# Supplementary material for: Genome-wide alterations of uracil distribution patterns in human DNA upon chemotherapeutic treatments
Source: eLife. 2020 Sep 21;9:e60498. doi: 10.7554/eLife.60498 (PMC7505663; doi:10.7554/eLife.60498)
Supplement: Appendix 1—figure 1—source data 1. [file elife-60498-app1-fig1-data1.xlsx]

## Sheet: 5FdUR_UGI
mid	counts		threshold:	0.18
-0.97	4
-0.95	30
-0.93	64
-0.91	114
-0.89	217
-0.87	333
-0.85	571
-0.83	934
-0.81	1482
-0.79	2289
-0.77	3442
-0.75	5350
-0.73	7801
-0.71	10599
-0.69	14288
-0.67	19406
-0.65	25213
-0.63	32941
-0.61	41870
-0.59	53265
-0.57	66556
-0.55	80874
-0.53	100333
-0.51	123682
-0.49	149676
-0.47	179265
-0.45	216348
-0.43	260480
-0.41	312048
-0.39	372456
-0.37	440252
-0.35	516301
-0.33	597140
-0.31	681014
-0.29	769295
-0.27	846444
-0.25	918120
-0.23	970500
-0.21	1008900
-0.19	1033858
-0.17	1041400
-0.15	1030568
-0.13	1009659
-0.11	970439
-0.09	927519
-0.07	876898
-0.05	823135
-0.03	774639
-0.01	739269
0.01	682979
0.03	624170
0.05	584301
0.07	546314
0.09	514717
0.11	489556
0.13	464674
0.15	444222
0.17	424848
0.19	406936
0.21	389588
0.23	372849
0.25	356762
0.27	340481
0.29	322992
0.31	305893
0.33	289581
0.35	272239
0.37	252749
0.39	234302
0.41	216789
0.43	198101
0.45	178401
0.47	160903
0.49	143298
0.51	125023
0.53	109320
0.55	95484
0.57	81597
0.59	69604
0.61	59192
0.63	49797
0.65	42248
0.67	34828
0.69	28234
0.71	22962
0.73	17800
0.75	14091
0.77	10828
0.79	7896
0.81	6271
0.83	4747
0.85	3297
0.87	2366
0.89	1590
0.91	1170
0.93	854
0.95	579
0.97	369
0.99	298
1.01	167
1.03	132
1.05	82
1.07	30
1.09	19
1.11	7
1.13	6
1.15	2

## Sheet: K562_Shu
mid	counts		threshold:	0.2
-1.07	2
-1.05	0
-1.03	0
-1.01	1
-0.99	1
-0.97	0
-0.95	0
-0.93	1
-0.91	0
-0.89	0
-0.87	0
-0.85	3
-0.83	2
-0.81	4
-0.79	8
-0.77	12
-0.75	18
-0.73	26
-0.71	44
-0.69	91
-0.67	163
-0.65	318
-0.63	525
-0.61	833
-0.59	1351
-0.57	2225
-0.55	3347
-0.53	4832
-0.51	7044
-0.49	10895
-0.47	16421
-0.45	23325
-0.43	33587
-0.41	46850
-0.39	64080
-0.37	87435
-0.35	115858
-0.33	151618
-0.31	198803
-0.29	251630
-0.27	314870
-0.25	387617
-0.23	470519
-0.21	561439
-0.19	659581
-0.17	763732
-0.15	867546
-0.13	969540
-0.11	1070095
-0.09	1167093
-0.07	1245270
-0.05	1316778
-0.03	1371029
-0.01	1420638
0.01	1424592
0.03	1390488
0.05	1348571
0.07	1294519
0.09	1218942
0.11	1132781
0.13	1038882
0.15	940631
0.17	836364
0.19	732148
0.21	628568
0.23	533804
0.25	447897
0.27	367384
0.29	299140
0.31	239133
0.33	187788
0.35	143988
0.37	110562
0.39	82125
0.41	60326
0.43	43591
0.45	31713
0.47	22326
0.49	15640
0.51	10828
0.53	7280
0.55	4911
0.57	3069
0.59	1975
0.61	1294
0.63	773
0.65	474
0.67	340
0.69	189
0.71	101
0.73	69
0.75	34
0.77	15
0.79	16
0.81	6
0.83	4
0.85	2
0.87	1
0.89	2
0.91	0
0.93	0
0.95	0
0.97	0
0.99	0
1.01	0
1.03	0
1.05	1

## Sheet: K562
mid	counts		threshold:	0.33
-2.47	1
-2.45	0
-2.43	0
-2.41	2
-2.39	0
-2.37	0
-2.35	0
-2.33	1
-2.31	0
-2.29	0
-2.27	1
-2.25	1
-2.23	1
-2.21	0
-2.19	2
-2.17	5
-2.15	14
-2.13	22
-2.11	37
-2.09	34
-2.07	40
-2.05	54
-2.03	59
-2.01	83
-1.99	92
-1.97	105
-1.95	112
-1.93	139
-1.91	149
-1.89	191
-1.87	228
-1.85	228
-1.83	270
-1.81	289
-1.79	342
-1.77	451
-1.75	490
-1.73	505
-1.71	533
-1.69	501
-1.67	572
-1.65	790
-1.63	822
-1.61	929
-1.59	1128
-1.57	1424
-1.55	1586
-1.53	1945
-1.51	2286
-1.49	2811
-1.47	3332
-1.45	3857
-1.43	4639
-1.41	5702
-1.39	6753
-1.37	8478
-1.35	9775
-1.33	11417
-1.31	13032
-1.29	15146
-1.27	17891
-1.25	20712
-1.23	23793
-1.21	27336
-1.19	30744
-1.17	34023
-1.15	37855
-1.13	41147
-1.11	45274
-1.09	49072
-1.07	54643
-1.05	58801
-1.03	63487
-1.01	69039
-0.99	74673
-0.97	80392
-0.95	86988
-0.93	92526
-0.91	98322
-0.89	104673
-0.87	112360
-0.85	118886
-0.83	125229
-0.81	132482
-0.79	140189
-0.77	146901
-0.75	154644
-0.73	163161
-0.71	169641
-0.69	180062
-0.67	189370
-0.65	199155
-0.63	209846
-0.61	219296
-0.59	231106
-0.57	243417
-0.55	255454
-0.53	269148
-0.51	279293
-0.49	297845
-0.47	309175
-0.45	324618
-0.43	337658
-0.41	352704
-0.39	366890
-0.37	382439
-0.35	399333
-0.33	415649
-0.31	431293
-0.29	447603
-0.27	463899
-0.25	479996
-0.23	493842
-0.21	508667
-0.19	520044
-0.17	533786
-0.15	545410
-0.13	555616
-0.11	564891
-0.09	576308
-0.07	586367
-0.05	594085
-0.03	599206
-0.01	616732
0.01	612356
0.03	598661
0.05	588353
0.07	583135
0.09	575983
0.11	564085
0.13	551775
0.15	538241
0.17	521959
0.19	505204
0.21	486806
0.23	466034
0.25	445935
0.27	424380
0.29	401874
0.31	377570
0.33	353852
0.35	330718
0.37	305887
0.39	280815
0.41	258391
0.43	235824
0.45	214748
0.47	194404
0.49	171907
0.51	154632
0.53	134639
0.55	119038
0.57	103593
0.59	89101
0.61	76829
0.63	65276
0.65	55476
0.67	46895
0.69	39122
0.71	32871
0.73	26777
0.75	22153
0.77	17316
0.79	14168
0.81	11466
0.83	9191
0.85	7258
0.87	5597
0.89	4362
0.91	3349
0.93	2701
0.95	2075
0.97	1497
0.99	1158
1.01	763
1.03	587
1.05	437
1.07	344
1.09	296
1.11	228
1.13	159
1.15	123
1.17	104
1.19	96
1.21	74
1.23	57
1.25	55
1.27	43
1.29	34
1.31	47
1.33	28
1.35	25
1.37	28
1.39	11
1.41	22
1.43	17
1.45	13
1.47	8
1.49	13
1.51	13
1.53	9
1.55	10
1.57	6
1.59	6
1.61	6
1.63	5
1.65	9
1.67	16
1.69	12
1.71	11
1.73	10
1.75	12
1.77	10
1.79	9
1.81	13
1.83	14
1.85	7
1.87	10
1.89	8
1.91	11
1.93	6
1.95	4
1.97	3
1.99	4
2.01	2
2.03	2
2.05	1
2.07	4
2.09	6
2.11	8
2.13	4
2.15	6
2.17	2
2.19	2
2.21	4
2.23	0
2.25	2
2.27	0
2.29	0
2.31	2
2.33	4
2.35	2
2.37	3
2.39	3
2.41	9
2.43	4
2.45	4
2.47	5
2.49	7
2.51	2
2.53	3
2.55	5
2.57	2
2.59	1
2.61	0
2.63	0
2.65	0
2.67	0
2.69	0
2.71	0
2.73	0
2.75	0
2.77	0
2.79	1

## Sheet: 5FdUR_UNGKO_Shu
mid	counts		threshold:	0.35
-3.49	1
-3.47	0
-3.45	0
-3.43	0
-3.41	0
-3.39	0
-3.37	0
-3.35	1
-3.33	0
-3.31	0
-3.29	2
-3.27	6
-3.25	8
-3.23	3
-3.21	4
-3.19	0
-3.17	0
-3.15	0
-3.13	0
-3.11	0
-3.09	0
-3.07	0
-3.05	1
-3.03	1
-3.01	0
-2.99	1
-2.97	0
-2.95	0
-2.93	0
-2.91	0
-2.89	0
-2.87	2
-2.85	0
-2.83	0
-2.81	0
-2.79	3
-2.77	6
-2.75	4
-2.73	13
-2.71	11
-2.69	5
-2.67	4
-2.65	4
-2.63	5
-2.61	2
-2.59	4
-2.57	5
-2.55	4
-2.53	3
-2.51	5
-2.49	5
-2.47	1
-2.45	3
-2.43	1
-2.41	0
-2.39	2
-2.37	1
-2.35	1
-2.33	4
-2.31	4
-2.29	11
-2.27	9
-2.25	10
-2.23	11
-2.21	16
-2.19	10
-2.17	10
-2.15	16
-2.13	19
-2.11	9
-2.09	9
-2.07	11
-2.05	7
-2.03	6
-2.01	9
-1.99	6
-1.97	7
-1.95	8
-1.93	6
-1.91	14
-1.89	14
-1.87	13
-1.85	17
-1.83	6
-1.81	12
-1.79	10
-1.77	6
-1.75	13
-1.73	12
-1.71	11
-1.69	21
-1.67	32
-1.65	38
-1.63	48
-1.61	64
-1.59	108
-1.57	120
-1.55	130
-1.53	177
-1.51	210
-1.49	257
-1.47	324
-1.45	423
-1.43	476
-1.41	577
-1.39	710
-1.37	940
-1.35	1133
-1.33	1421
-1.31	1769
-1.29	2301
-1.27	2891
-1.25	3529
-1.23	4487
-1.21	5501
-1.19	6938
-1.17	8597
-1.15	10773
-1.13	13125
-1.11	15829
-1.09	18924
-1.07	23122
-1.05	27709
-1.03	32448
-1.01	37883
-0.99	44985
-0.97	53227
-0.95	60211
-0.93	69284
-0.91	79169
-0.89	90092
-0.87	103330
-0.85	115347
-0.83	128755
-0.81	143290
-0.79	158021
-0.77	174697
-0.75	191327
-0.73	210297
-0.71	227028
-0.69	244061
-0.67	263377
-0.65	282412
-0.63	301594
-0.61	320783
-0.59	341871
-0.57	358998
-0.55	378066
-0.53	396854
-0.51	414257
-0.49	434083
-0.47	453152
-0.45	466716
-0.43	481559
-0.41	494975
-0.39	507636
-0.37	517650
-0.35	526894
-0.33	532657
-0.31	539675
-0.29	541300
-0.27	541575
-0.25	541332
-0.23	534591
-0.21	532758
-0.19	525044
-0.17	519670
-0.15	509664
-0.13	502890
-0.11	488302
-0.09	479260
-0.07	468409
-0.05	457523
-0.03	448834
-0.01	453433
0.01	424802
0.03	397431
0.05	375839
0.07	357301
0.09	342857
0.11	325910
0.13	313224
0.15	297585
0.17	282754
0.19	270138
0.21	258134
0.23	246482
0.25	235017
0.27	225154
0.29	216556
0.31	205474
0.33	196898
0.35	187733
0.37	180885
0.39	173577
0.41	166930
0.43	160851
0.45	154027
0.47	148519
0.49	142356
0.51	138083
0.53	132213
0.55	127370
0.57	123205
0.59	118958
0.61	114395
0.63	110525
0.65	107188
0.67	103411
0.69	99875
0.71	96633
0.73	93385
0.75	90529
0.77	86236
0.79	83113
0.81	80779
0.83	78486
0.85	75922
0.87	73349
0.89	70597
0.91	68457
0.93	66242
0.95	64688
0.97	62619
0.99	61057
1.01	58331
1.03	57420
1.05	54786
1.07	53670
1.09	52405
1.11	50564
1.13	48597
1.15	47168
1.17	46030
1.19	45075
1.21	43351
1.23	42021
1.25	40778
1.27	39528
1.29	37824
1.31	37055
1.33	35718
1.35	34821
1.37	34153
1.39	32770
1.41	31871
1.43	30744
1.45	29523
1.47	28507
1.49	27589
1.51	27318
1.53	25988
1.55	24853
1.57	24598
1.59	23561
1.61	22942
1.63	21777
1.65	20938
1.67	20057
1.69	19917
1.71	18766
1.73	18597
1.75	17623
1.77	16801
1.79	16419
1.81	15994
1.83	15351
1.85	14648
1.87	14308
1.89	13886
1.91	13452
1.93	13068
1.95	12788
1.97	12359
1.99	11744
2.01	11311
2.03	11098
2.05	10499
2.07	10315
2.09	9938
2.11	9600
2.13	9259
2.15	9096
2.17	8669
2.19	8320
2.21	7946
2.23	7617
2.25	7343
2.27	7029
2.29	6674
2.31	6294
2.33	6157
2.35	5897
2.37	5735
2.39	5600
2.41	5170
2.43	4862
2.45	4834
2.47	4714
2.49	4425
2.51	4151
2.53	4111
2.55	3866
2.57	3913
2.59	3690
2.61	3345
2.63	3478
2.65	3345
2.67	3241
2.69	2990
2.71	2878
2.73	2734
2.75	2582
2.77	2457
2.79	2361
2.81	2229
2.83	2202
2.85	2054
2.87	1990
2.89	1871
2.91	1807
2.93	1709
2.95	1665
2.97	1611
2.99	1621
3.01	1316
3.03	1260
3.05	1109
3.07	1109
3.09	998
3.11	1088
3.13	927
3.15	959
3.17	872
3.19	817
3.21	792
3.23	728
3.25	774
3.27	787
3.29	737
3.31	636
3.33	643
3.35	590
3.37	522
3.39	473
3.41	420
3.43	378
3.45	405
3.47	368
3.49	300
3.51	313
3.53	287
3.55	267
3.57	233
3.59	199
3.61	153
3.63	121
3.65	127
3.67	125
3.69	127
3.71	118
3.73	85
3.75	119
3.77	100
3.79	67
3.81	48
3.83	47
3.85	26
3.87	25
3.89	39
3.91	33
3.93	15
3.95	18
3.97	5
3.99	13
4.01	4
4.03	6
4.05	5
4.07	8
4.09	7
4.11	3
4.13	2
4.15	8
4.17	9
4.19	9
4.21	4
4.23	3
4.25	4
