# Supplementary material for: Genome-wide alterations of uracil distribution patterns in human DNA upon chemotherapeutic treatments
Source: eLife. 2020 Sep 21;9:e60498. doi: 10.7554/eLife.60498 (PMC7505663; doi:10.7554/eLife.60498)
Supplement: Appendix 1—figure 2—source data 1. [file elife-60498-app1-fig2-data1.xlsx]

## Sheet: WT
Replication timing group	log2 uracil enrichment
1	-0.000114787
1	-0.000144753
1	-0.000148242
1	-0.000163355
1	-0.00016343
1	-0.000187095
1	-0.00018864
1	-0.000192648
1	-0.000199005
1	-0.00020665
1	0.000216004
1	-0.000224223
1	0.000234601
1	-0.000235312
1	0.000251957
1	-0.000255499
1	-0.000259475
1	-0.000259955
1	-0.000263047
1	-0.000274359
1	-0.000275661
1	0.000287111
1	0.000309208
1	-0.000310719
1	0.000314639
1	-0.000314765
1	0.000316407
1	-0.000323265
1	0.000328061
1	0.00033466
1	-0.000334748
1	0.000341841
1	-0.00034718
1	-0.000347283
1	-0.000377639
1	-0.000384342
1	0.000398802
1	-0.000405712
1	0.000410724
1	0.000450997
1	0.00045837
1	-0.000459831
1	0.000463407
1	-0.000464452
1	-0.000485162
1	0.000486141
1	-0.000488142
1	-0.000489454
1	-0.000510598
1	-0.00051723
1	-0.000517961
1	0.000526523
1	-0.000529122
1	0.000539591
1	-0.000559104
1	-0.00058224
1	-0.000599069
1	-0.000601366
1	-0.00060573
1	-0.000607381
1	0.000615296
1	0.000618342
1	-0.000625105
1	0.000627876
1	0.000659054
1	-0.000662157
1	0.000665856
1	0.00067237
1	0.00067381
1	0.000676853
1	0.000683854
1	0.000685092
1	0.000694515
1	-0.000697892
1	0.00069993
1	-0.000705528
1	0.000720091
1	-0.000722824
1	-0.00073146
1	-0.000742109
1	0.000743239
1	0.000750467
1	-0.000751424
1	0.000753419
1	0.000757834
1	-0.000775153
1	0.00078491
1	-0.000786339
1	0.000801903
1	-0.000824114
1	-0.000831445
1	0.000842266
1	0.000874094
1	0.000883708
1	-0.000894402
1	0.000899677
1	0.000906996
1	-0.000909628
1	0.000910446
1	0.000917099
1	0.000921987
1	0.000929208
1	0.000946111
1	0.000953591
1	-0.00096558
1	0.000970762
1	-0.000975243
1	0.000980832
1	0.000982937
1	-0.000986941
1	-0.000999677
1	0.00100346
1	-0.00102315
1	-0.00102438
1	0.00102467
1	-0.0010248
1	0.00102969
1	0.00103964
1	-0.00104259
1	-0.00104811
1	-0.00104928
1	0.00105724
1	0.00106667
1	0.00107723
1	0.00107982
1	-0.00108118
1	0.00108245
1	-0.00109244
1	-0.00109909
1	-0.00109996
1	0.00110704
1	0.00110708
1	0.0011097
1	-0.00111509
1	0.00113819
1	0.00114418
1	-0.00118109
1	0.00118891
1	0.00119351
1	0.00119455
1	0.00120772
1	0.00120946
1	0.00121334
1	-0.0012138
1	-0.00121783
1	-0.00121926
1	-0.00122091
1	-0.00122862
1	0.00123027
1	0.00123613
1	-0.0012398
1	0.00125277
1	-0.00125509
1	0.00126098
1	-0.00126136
1	-0.00126335
1	0.00128523
1	-0.00129903
1	-0.00130616
1	-0.00132907
1	0.00133109
1	-0.00133795
1	0.00133889
1	-0.00134783
1	-0.00134889
1	0.00135468
1	-0.00136508
1	0.00136782
1	-0.00137134
1	-0.00137351
1	0.00137582
1	-0.0013775
1	0.00138587
1	-0.00138858
1	-0.00139165
1	-0.00139217
1	0.00139259
1	-0.00139795
1	0.00140201
1	0.00141465
1	0.00142218
1	0.0014383
1	-0.00144114
1	-0.00145846
1	0.00146017
1	0.00146843
1	-0.00146853
1	0.0014717
1	-0.00147209
1	0.00147664
1	0.00149506
1	-0.00149976
1	0.00151342
1	0.00152197
1	-0.00153372
1	0.00153566
1	-0.00153743
1	-0.00153911
1	-0.00153976
1	0.0015404
1	-0.00155319
1	-0.00155773
1	0.00155857
1	0.00157761
1	0.00158072
1	0.00159375
1	0.00160439
1	0.00160637
1	-0.00161506
1	0.00161786
1	0.00163095
1	0.00163225
1	-0.0016377
1	-0.00163909
1	-0.00164121
1	0.00164974
1	0.00165586
1	-0.00166197
1	-0.00167428
1	-0.00168461
1	0.00169687
1	0.00169703
1	0.00169739
1	0.00171614
1	0.00172147
1	0.00172194
1	-0.00172688
1	0.00173471
1	0.00174226
1	-0.0017423
1	-0.00176388
1	-0.00176589
1	0.00177136
1	0.00177875
1	-0.00180253
1	-0.00180426
1	0.0018124
1	0.0018136
1	0.00182301
1	-0.00182793
1	0.00182832
1	0.00183054
1	0.00183971
1	0.00184319
1	0.00184473
1	0.00185092
1	0.00185916
1	0.00186933
1	-0.00187145
1	0.0018723
1	0.00187319
1	0.00187594
1	0.00188554
1	-0.00188947
1	0.00189354
1	-0.00190807
1	0.00191687
1	-0.00191806
1	0.00192417
1	0.00192418
1	0.00193108
1	0.00193488
1	-0.00193585
1	-0.00193951
1	0.00195502
1	0.00196196
1	-0.00196495
1	0.00196561
1	-0.00196622
1	0.00196681
1	-0.0019681
1	0.00197561
1	-0.00198302
1	0.00199795
1	-0.00199931
1	0.00200833
1	-0.00201541
1	-0.00202698
1	-0.00202698
1	-0.00202698
1	-0.00202698
1	-0.00202698
1	-0.00203237
1	-0.00203964
1	-0.00204541
1	-0.00204703
1	-0.00206352
1	-0.00206621
1	0.00206661
1	0.00207853
1	-0.00208397
1	-0.00208835
1	-0.00209865
1	0.00210087
1	0.00211036
1	0.00213842
1	0.00214426
1	-0.00214432
1	0.00214793
1	0.00214855
1	-0.00215476
1	-0.0021581
1	-0.00215991
1	-0.00216344
1	0.00216909
1	-0.00216977
1	0.00218145
1	0.00218261
1	-0.00218669
1	-0.0021872
1	-0.00219551
1	-0.00219569
1	0.00219764
1	-0.00220149
1	0.00221865
1	0.00221981
1	-0.00222525
1	-0.00223626
1	-0.00223845
1	-0.00224104
1	-0.00224113
1	0.00225362
1	0.0022598
1	0.00226003
1	-0.00226113
1	-0.00227359
1	0.00227373
1	0.00228295
1	-0.00228548
1	-0.00229124
1	-0.00229274
1	0.00229534
1	0.00229715
1	-0.00229782
1	0.00230243
1	0.00231949
1	0.00232336
1	0.00233865
1	0.00233948
1	-0.00234698
1	0.00234862
1	-0.00236605
1	0.00236894
1	0.00237281
1	0.00237941
1	-0.00238511
1	0.00239016
1	0.00239497
1	-0.00241034
1	-0.00241255
1	0.00241349
1	-0.00242034
1	-0.00243326
1	-0.00243533
1	0.00244763
1	0.00246042
1	-0.00246701
1	0.00246787
1	-0.00247076
1	0.00247193
1	-0.00247694
1	-0.00248029
1	-0.00249249
1	0.0024948
1	-0.00249898
1	0.00250027
1	-0.00250886
1	0.00251032
1	0.0025137
1	0.00251783
1	0.0025268
1	-0.00253306
1	-0.00253649
1	0.00253756
1	-0.00254071
1	0.00254328
1	0.00254747
1	0.002552
1	-0.00258759
1	0.00259084
1	0.00259677
1	-0.00260196
1	-0.00260462
1	-0.00262282
1	0.00262591
1	-0.00263207
1	0.00263773
1	-0.00264116
1	-0.00264383
1	0.00264688
1	0.00265144
1	-0.00265447
1	-0.00266566
1	-0.00266656
1	-0.00267818
1	0.00267887
1	0.00268479
1	0.00269546
1	0.00269727
1	-0.00270137
1	-0.00270557
1	0.00271204
1	-0.00273351
1	-0.002743
1	0.0027443
1	-0.00275169
1	-0.00278109
1	0.00278452
1	0.00278805
1	0.00279386
1	-0.00279426
1	0.00280189
1	0.0028044
1	0.00280447
1	0.00281681
1	0.00284342
1	0.00285572
1	0.00285852
1	-0.00287904
1	-0.00288055
1	-0.00288467
1	-0.00289615
1	-0.00291534
1	0.00292309
1	0.00292746
1	0.00293347
1	0.00294315
1	-0.0029632
1	0.00296365
1	0.00297589
1	-0.00297606
1	-0.00297879
1	-0.00298838
1	0.00299236
1	-0.00299462
1	-0.00300593
1	0.00302199
1	-0.00302387
1	-0.00303255
1	-0.00303491
1	0.00303919
1	-0.00303987
1	-0.00304214
1	0.00305042
1	0.00305378
1	-0.00305814
1	-0.00306091
1	-0.00307285
1	0.00307482
1	-0.00307861
1	0.00309161
1	-0.00312077
1	-0.00313251
1	-0.00313558
1	0.00313797
1	-0.00314917
1	-0.00314978
1	0.00315715
1	-0.00315908
1	-0.00316577
1	0.003204
1	0.00320978
1	-0.00322318
1	-0.0032256
1	0.00323554
1	0.00324249
1	-0.00324365
1	-0.00325158
1	0.0032535
1	0.00325678
1	0.00326598
1	-0.00327464
1	-0.00327991
1	-0.00330554
1	-0.00331294
1	0.0033154
1	-0.0033262
1	0.00332744
1	-0.00333599
1	0.00334427
1	-0.00335934
1	-0.00336204
1	0.00336485
1	0.00336702
1	0.00337126
1	-0.00337198
1	-0.00338933
1	-0.00339297
1	-0.00340581
1	-0.00342279
1	-0.00342633
1	0.00344173
1	0.00345309
1	0.00346357
1	0.00347241
1	-0.00347306
1	-0.00348217
1	0.00348434
1	0.00350494
1	-0.00351116
1	0.00352423
1	-0.00354048
1	-0.00355464
1	-0.00355802
1	-0.00356807
1	0.00356836
1	-0.00357166
1	-0.00358495
1	-0.00359881
1	-0.00360232
1	-0.00360289
1	-0.00360428
1	0.0036104
1	-0.00361657
1	-0.00362197
1	-0.00362384
1	-0.00362946
1	-0.00365653
1	0.00366065
1	-0.00366133
1	0.00366561
1	0.00366568
1	-0.00367106
1	-0.00368507
1	0.00369091
1	0.003691
1	-0.00369187
1	-0.00369502
1	-0.00369752
1	-0.00371083
1	0.00371589
1	-0.00371653
1	0.00371944
1	-0.00372065
1	0.00372065
1	0.00372457
1	-0.00372943
1	0.00373399
1	-0.00373749
1	-0.00375621
1	-0.00375844
1	0.00376837
1	-0.00377548
1	0.00379732
1	0.0038044
1	0.0038047
1	0.00381376
1	0.00382009
1	-0.00383879
1	0.0038392
1	-0.00384442
1	0.00384711
1	-0.00385138
1	0.00385298
1	0.00385928
1	-0.00386959
1	0.00387121
1	-0.00388004
1	0.00388128
1	-0.00388734
1	-0.00388937
1	-0.00389579
1	0.00391803
1	-0.00392216
1	-0.00392276
1	-0.00392281
1	0.00392804
1	-0.0039385
1	0.00394024
1	0.00394044
1	-0.00394265
1	0.00395033
1	0.00395296
1	-0.00395577
1	0.00396154
1	0.00396786
1	-0.00396991
1	0.00397184
1	0.0039806
1	-0.00400651
1	-0.00401342
1	-0.00402215
1	0.00403516
1	-0.00403715
1	-0.0040379
1	0.00404278
1	0.00404652
1	-0.00404798
1	-0.00404954
1	-0.00404954
1	0.00405123
1	0.0040532
1	0.00405798
1	0.00406357
1	-0.00407092
1	-0.00407164
1	0.0040801
1	-0.00408204
1	-0.00409245
1	0.00409353
1	0.00409773
1	-0.00410437
1	-0.00410448
1	0.00410676
1	0.00410724
1	-0.00410997
1	0.00411042
1	0.00412876
1	-0.00413183
1	-0.00413758
1	0.00414059
1	-0.00414198
1	-0.00414326
1	-0.00414786
1	-0.00415026
1	0.00416261
1	0.00416749
1	0.00416822
1	0.00416959
1	0.00417361
1	-0.00418152
1	-0.0041816
1	0.00418996
1	-0.00419008
1	-0.00419009
1	-0.00419762
1	-0.00420928
1	0.00422836
1	-0.00424149
1	0.00424493
1	0.0042574
1	-0.0042586
1	0.00426013
1	0.0042688
1	0.0042729
1	0.00427824
1	-0.0042904
1	0.0043
1	0.00430198
1	-0.00431703
1	0.00431842
1	-0.00432148
1	-0.00432344
1	0.00433729
1	0.00435044
1	-0.00436028
1	-0.00437039
1	0.00438544
1	-0.00440349
1	0.00441176
1	0.0044125
1	0.00441299
1	0.0044218
1	0.00442724
1	0.00444323
1	0.00444564
1	0.00444858
1	-0.00445289
1	0.00445336
1	-0.00445933
1	-0.00446559
1	0.00446677
1	0.00446697
1	-0.00447755
1	-0.00448162
1	0.00448463
1	0.00448703
1	-0.00449181
1	0.00449459
1	0.00449677
1	-0.00449912
1	0.00450398
1	0.00450518
1	0.00450673
1	0.00450992
1	-0.0045149
1	0.00454068
1	-0.00454848
1	0.00454996
1	-0.00455113
1	0.00455686
1	0.00455729
1	0.00457601
1	-0.00458921
1	-0.00459151
1	-0.00459379
1	0.00460066
1	-0.00460755
1	-0.00461397
1	-0.00461686
1	0.0046205
1	-0.00464161
1	-0.00466215
1	-0.00466432
1	0.0046726
1	0.00467552
1	0.00470577
1	0.00470922
1	-0.00470939
1	0.00471344
1	0.00471674
1	-0.0047193
1	-0.00472069
1	-0.00472195
1	-0.00472584
1	-0.00472829
1	-0.0047289
1	-0.00475121
1	0.00476786
1	-0.00477165
1	0.00477309
1	-0.00477391
1	0.00477893
1	0.00478132
1	0.00478213
1	-0.00478472
1	0.00478563
1	-0.0047885
1	0.00478866
1	-0.00479581
1	0.0048032
1	0.00480691
1	-0.00480952
1	-0.00481185
1	0.00482013
1	-0.00482795
1	-0.00482854
1	0.00484615
1	0.00485143
1	0.00485287
1	-0.00485913
1	-0.00485931
1	0.00486181
1	0.00487975
1	-0.00488275
1	0.00489146
1	-0.00489929
1	-0.00489986
1	-0.00490481
1	0.00490969
1	0.00492414
1	0.00493418
1	-0.00493434
1	-0.00494742
1	0.00494754
1	-0.00495225
1	0.0049537
1	-0.00496587
1	0.00496661
1	-0.00497876
1	-0.00498013
1	-0.00498254
1	-0.004988
1	0.00499362
1	0.00500449
1	0.00500908
1	-0.00501151
1	0.00501154
1	-0.00501997
1	-0.00502523
1	0.00503335
1	0.00504152
1	-0.00504298
1	0.00504497
1	-0.00504522
1	0.00504659
1	-0.00505829
1	0.00506704
1	0.00506789
1	0.00507188
1	-0.00511282
1	0.00511829
1	0.00511948
1	-0.00512075
1	-0.00512217
1	0.00512831
1	-0.00513433
1	-0.00513713
1	0.00513842
1	0.00514213
1	-0.00516214
1	-0.00517312
1	-0.00519026
1	-0.00519056
1	0.00519499
1	-0.00519796
1	0.00520423
1	-0.00521814
1	-0.00522075
1	0.0052224
1	0.00522458
1	0.00522644
1	-0.00523429
1	-0.0052373
1	0.00524366
1	0.00524547
1	-0.00525115
1	-0.00525209
1	0.00525307
1	-0.00525333
1	-0.00525524
1	0.00527009
1	0.00528183
1	-0.00528307
1	-0.00530636
1	-0.00530838
1	-0.00531287
1	-0.00531771
1	-0.0053185
1	-0.00533219
1	0.00534997
1	0.00535161
1	0.00535294
1	-0.00536563
1	-0.00537138
1	0.00538114
1	0.00538669
1	-0.00538909
1	0.00539364
1	-0.00539638
1	-0.00539801
1	0.00540686
1	0.0054128
1	-0.00541786
1	-0.0054442
1	0.00546234
1	-0.00546599
1	0.00546847
1	-0.0054728
1	0.00547599
1	-0.00548431
1	-0.00548455
1	0.00549017
1	0.00549357
1	0.00549404
1	0.00550139
1	0.00551746
1	-0.00551934
1	0.00553419
1	-0.00553895
1	-0.00554861
1	-0.00555417
1	-0.00556654
1	-0.00558801
1	0.00559783
1	0.00559865
1	-0.00561057
1	-0.00561575
1	0.00562542
1	0.00563432
1	-0.00564178
1	-0.0056463
1	0.00565683
1	-0.0056634
1	0.00566365
1	-0.00567178
1	-0.00567827
1	0.00568021
1	0.00568803
1	-0.005698
1	-0.00572573
1	0.00572679
1	0.00575314
1	-0.00576244
1	0.00577063
1	-0.00577969
1	0.00578599
1	-0.00579185
1	0.00579251
1	-0.00579258
1	-0.00579616
1	0.0058017
1	0.00581493
1	0.00581613
1	0.00583765
1	-0.00583767
1	0.00584196
1	-0.00584466
1	0.00585509
1	-0.00586261
1	-0.00586813
1	-0.00586914
1	0.00587022
1	-0.00587076
1	0.00587689
1	0.00588014
1	-0.00589832
1	-0.00590438
1	-0.00591759
1	0.00593278
1	0.00593385
1	0.00593584
1	0.00593731
1	0.00595342
1	-0.00596265
1	0.00597914
1	-0.00598892
1	0.00599757
1	0.00600016
1	0.00601062
1	-0.00604399
1	0.00604582
1	-0.0060464
1	-0.00604723
1	0.00605038
1	0.00605151
1	0.00605686
1	-0.00606416
1	-0.00606562
1	0.00606981
1	0.00607194
1	-0.00607293
1	-0.00607389
1	0.00607698
1	0.00610468
1	-0.00610626
1	0.00610737
1	-0.00613484
1	0.00613691
1	0.00613823
1	0.00614247
1	0.00615101
1	0.00615509
1	-0.00616294
1	0.00617049
1	0.00617077
1	-0.00617104
1	-0.00617141
1	0.00617176
1	0.0061797
1	-0.00618187
1	0.00618956
1	0.00619584
1	0.0061987
1	-0.00621276
1	-0.00621697
1	0.00621887
1	-0.00622921
1	0.00623287
1	-0.00624037
1	0.00624775
1	-0.00625766
1	0.00625949
1	0.00626036
1	-0.00626419
1	-0.00626755
1	-0.00626983
1	-0.00627375
1	0.00628663
1	-0.00629583
1	-0.00630015
1	-0.00630717
1	-0.00630829
1	-0.00631412
1	0.00631642
1	-0.00633505
1	0.00633983
1	-0.00634383
1	0.00634478
1	-0.00634878
1	-0.00634971
1	0.00635775
1	0.0063579
1	0.00635814
1	-0.00637835
1	0.00637899
1	0.00638813
1	-0.00638882
1	0.00642149
1	-0.0064339
1	0.00643767
1	0.0064383
1	0.00645816
1	0.00646483
1	-0.00649718
1	-0.00650112
1	-0.00651097
1	-0.00651785
1	0.00652124
1	0.00652404
1	0.00652775
1	-0.00653233
1	-0.00654053
1	-0.00654297
1	0.00654438
1	0.00654496
1	-0.00654611
1	0.00655221
1	0.00655434
1	0.00655525
1	0.00655599
1	-0.00656696
1	0.00657902
1	-0.00658076
1	-0.00658606
1	-0.00659127
1	-0.00659981
1	0.00660708
1	0.00660758
1	-0.00661404
1	0.00663961
1	0.00664402
1	0.00664549
1	-0.00664582
1	-0.00666129
1	-0.00666142
1	-0.00666773
1	-0.00666927
1	0.00667501
1	-0.00667652
1	0.0066767
1	0.00667815
1	0.00668008
1	-0.00668509
1	-0.00668957
1	-0.00669573
1	-0.0066969
1	-0.00669703
1	-0.00670609
1	0.00671275
1	0.00671351
1	0.0067237
1	0.00672907
1	0.00673251
1	-0.00673984
1	0.00675088
1	0.00675682
1	0.00676069
1	0.00676478
1	-0.00677311
1	0.00677784
1	0.00678885
1	0.00679031
1	-0.00680321
1	0.00680611
1	-0.00680854
1	-0.00682887
1	-0.00682933
1	-0.00683111
1	0.00683562
1	-0.0068438
1	0.00684494
1	0.00684847
1	-0.0068496
1	-0.00686023
1	-0.00687387
1	-0.006876
1	-0.00688382
1	0.00690921
1	0.00690975
1	-0.00691366
1	-0.00693814
1	0.0069453
1	0.00694846
1	0.00695052
1	-0.00695469
1	-0.00695988
1	-0.00696123
1	-0.00696469
1	0.00696593
1	-0.00697865
1	-0.00698444
1	-0.00699211
1	-0.00702042
1	-0.00703042
1	-0.00703269
1	-0.00704788
1	-0.00705382
1	0.00705736
1	-0.00706607
1	0.00706998
1	-0.00708034
1	-0.00709238
1	-0.00709669
1	-0.0071066
1	-0.00710747
1	-0.00711706
1	-0.00711746
1	0.00712348
1	-0.00713878
1	0.00714083
1	0.00714214
1	0.0071445
1	0.00715471
1	0.00715581
1	0.0071635
1	-0.00716517
1	-0.00716561
1	-0.00717248
1	-0.00717827
1	-0.0071846
1	-0.00718651
1	0.00718711
1	0.00719987
1	0.00721958
1	0.00722335
1	-0.00723092
1	-0.00723469
1	0.00725224
1	-0.00726885
1	0.00727329
1	0.00728335
1	-0.00728439
1	-0.00729155
1	-0.00729217
1	-0.00730288
1	-0.00730559
1	0.00731025
1	-0.00731108
1	0.00731757
1	-0.0073267
1	0.00734111
1	0.00735123
1	-0.00735307
1	-0.00735566
1	-0.00735705
1	0.00736192
1	-0.00737464
1	-0.0073837
1	0.00738822
1	-0.00738828
1	0.00739139
1	-0.0073945
1	-0.00739992
1	-0.00741966
1	-0.00743069
1	0.00743096
1	0.0074329
1	-0.00743607
1	0.00743723
1	0.0074394
1	0.00744048
1	0.00744263
1	-0.00744372
1	-0.00744413
1	-0.00745053
1	-0.0074633
1	0.00746603
1	-0.0074724
1	0.00747859
1	0.00749333
1	0.0075027
1	-0.00750461
1	-0.00750996
1	0.00752222
1	-0.00752308
1	-0.00752454
1	-0.00752577
1	0.00752798
1	0.00752907
1	-0.00755079
1	0.00755223
1	0.00756868
1	-0.00757118
1	0.00758198
1	0.00762805
1	0.00762907
1	0.00763564
1	-0.00763588
1	0.00764224
1	0.00764789
1	0.00764832
1	-0.00765174
1	0.00765441
1	0.00765732
1	-0.00765943
1	0.00766969
1	-0.00767213
1	-0.00767461
1	-0.00767621
1	0.0076798
1	-0.00768552
1	-0.00768803
1	-0.00770798
1	-0.00771026
1	-0.00771693
1	-0.00772117
1	0.00773209
1	-0.00773771
1	-0.00774883
1	0.00774896
1	-0.00775448
1	0.00775794
1	-0.0077595
1	0.00776405
1	0.0077771
1	-0.00777916
1	0.00778073
1	-0.00779274
1	0.00779621
1	-0.00781338
1	-0.00781496
1	0.00781849
1	0.00782492
1	-0.00782747
1	0.00783323
1	0.00783906
1	0.00784427
1	-0.00784586
1	-0.00784667
1	0.00785467
1	0.00786154
1	-0.00789261
1	0.00790126
1	0.00790892
1	-0.00791818
1	-0.00792386
1	-0.0079241
1	-0.00793257
1	0.00793359
1	0.00793729
1	0.00793831
1	0.00793904
1	0.00794355
1	-0.00795394
1	-0.00795927
1	-0.00796119
1	0.00796149
1	0.00796349
1	-0.00797119
1	0.00797234
1	0.0079756
1	0.00798368
1	0.00798427
1	-0.00798528
1	-0.00798798
1	0.00799708
1	0.00800472
1	-0.00801197
1	-0.00802816
1	0.00802862
1	-0.00803397
1	-0.00803891
1	0.00806505
1	-0.00806509
1	0.0080934
1	-0.00809628
1	-0.00810105
1	0.00811568
1	0.00811599
1	-0.00811823
1	0.00811826
1	-0.00813324
1	0.00813576
1	-0.00813748
1	0.00813981
1	-0.00814646
1	-0.00816224
1	0.00816884
1	-0.00817149
1	-0.00817232
1	-0.00820461
1	-0.00820961
1	0.0082157
1	-0.00822587
1	0.00823057
1	0.00823142
1	0.00823563
1	0.00823683
1	0.0082397
1	-0.00824255
1	-0.00824442
1	0.00824912
1	-0.00826723
1	-0.0082674
1	0.00827481
1	0.0082781
1	-0.00828205
1	0.00828934
1	0.008293
1	-0.00830052
1	0.0083101
1	0.00831309
1	-0.00832006
1	-0.00832189
1	-0.00832523
1	-0.00833201
1	-0.00834339
1	0.00834763
1	-0.00836339
1	-0.00839696
1	-0.00841722
1	-0.00842067
1	0.00843285
1	-0.00843898
1	0.00844024
1	-0.00847144
1	-0.00847476
1	-0.00847633
1	-0.00848578
1	0.00849527
1	0.00850552
1	0.00851035
1	0.00851615
1	-0.00853755
1	-0.0085517
1	-0.0085554
1	-0.00856076
1	0.00856495
1	0.00856514
1	0.00857628
1	-0.00857758
1	0.00858613
1	0.00858894
1	-0.00860144
1	-0.00860204
1	-0.00860437
1	-0.00860628
1	-0.00861937
1	0.00862415
1	-0.00863712
1	0.00863722
1	0.00863848
1	0.00865191
1	-0.00865877
1	-0.00866302
1	-0.00866304
1	-0.00867068
1	-0.0086784
1	-0.00868541
1	0.00868891
1	-0.00870396
1	0.0087053
1	-0.00870686
1	-0.00872368
1	0.00872567
1	-0.00872698
1	0.00873671
1	0.00873777
1	-0.00875127
1	0.0087526
1	-0.00877442
1	0.00877676
1	0.00881053
1	-0.00881294
1	0.00881481
1	0.00882042
1	-0.00882706
1	0.00883192
1	-0.00883227
1	-0.00883647
1	-0.00884316
1	-0.00885375
1	0.00885404
1	0.00885512
1	0.00885608
1	0.00886212
1	-0.00886347
1	-0.00886364
1	0.00887394
1	-0.00889135
1	-0.00889434
1	0.00891402
1	-0.00892714
1	0.00893059
1	-0.00893105
1	0.00893322
1	0.00893724
1	-0.00895239
1	-0.00895359
1	0.00895936
1	-0.00896122
1	0.00896341
1	0.00896382
1	-0.00896549
1	-0.00897307
1	0.00897678
1	0.0089782
1	0.00900019
1	0.00900222
1	0.00900361
1	-0.00901008
1	-0.00901526
1	0.00901626
1	-0.00902195
1	0.00902229
1	0.00902232
1	-0.00902405
1	0.00903423
1	-0.00903481
1	-0.00903767
1	0.00905119
1	-0.00905949
1	-0.00906034
1	-0.00906468
1	-0.00908175
1	0.00908233
1	-0.00908552
1	-0.00909671
1	-0.00910641
1	0.00911112
1	-0.00911369
1	-0.00912245
1	0.00912716
1	0.00914394
1	-0.00914811
1	0.00914871
1	0.00914928
1	-0.00915377
1	0.00915865
1	-0.00917904
1	-0.00917956
1	-0.00918648
1	-0.00918738
1	0.00919388
1	-0.00919425
1	0.0091947
1	-0.00921848
1	0.00921858
1	0.00923258
1	-0.00923431
1	-0.00923797
1	-0.00924015
1	0.00924238
1	0.0092429
1	-0.00925468
1	-0.00926535
1	-0.00926655
1	0.00928409
1	-0.00928551
1	-0.00928657
1	-0.00930056
1	-0.00930785
1	-0.00931528
1	0.00931697
1	0.00931913
1	0.00932437
1	0.00933637
1	-0.00934393
1	-0.00935307
1	0.00935969
1	-0.0093797
1	-0.00938501
1	-0.00938638
1	0.00940213
1	-0.00940402
1	-0.00940885
1	0.00941136
1	0.00941174
1	0.00942163
1	-0.00943545
1	0.00943851
1	-0.00944511
1	-0.00944602
1	-0.00945066
1	-0.00946137
1	-0.0094663
1	0.00946766
1	0.0094765
1	-0.00948085
1	-0.00950371
1	-0.00950651
1	0.00951355
1	0.00952463
1	-0.00953697
1	0.00953831
1	-0.00953894
1	0.00954058
1	-0.00954625
1	0.00956329
1	-0.00956369
1	0.00958512
1	0.00959813
1	0.00960922
1	0.00961829
1	0.00963002
1	0.00963487
1	-0.00964251
1	0.00964456
1	-0.00964732
1	0.00965279
1	-0.00965517
1	-0.00966027
1	-0.00966869
1	-0.00966894
1	-0.00967276
1	0.00967811
1	-0.00967876
1	0.00968098
1	0.00968871
1	-0.00969054
1	0.00971
1	0.00971403
1	-0.00971592
1	0.00972599
1	0.00973353
1	-0.00973411
1	-0.00973712
1	-0.00975665
1	0.00975862
1	-0.00976006
1	-0.00976081
1	-0.00976373
1	0.00976589
1	0.00976633
1	0.00977809
1	0.00979978
1	0.00980653
1	0.00980803
1	-0.00980927
1	0.00981671
1	-0.00982565
1	-0.00983245
1	0.00983741
1	0.00983936
1	-0.00984281
1	-0.00984892
1	-0.00986959
1	0.00987229
1	-0.00987969
1	0.00989781
1	0.00989839
1	-0.00990682
1	0.00991054
1	0.00991926
1	-0.00992816
1	0.00994608
1	0.00995321
1	-0.00996531
1	-0.00997454
1	0.00998798
1	0.0100004
1	0.0100029
1	0.0100149
1	-0.0100183
1	0.0100358
1	-0.0100473
1	0.0100503
1	0.0100518
1	-0.0100558
1	0.0100567
1	0.010058
1	-0.0100581
1	0.0100698
1	-0.0100777
1	-0.0100821
1	0.0100866
1	0.0100878
1	-0.0100894
1	0.010096
1	-0.010124
1	0.0101256
1	-0.0101296
1	0.010143
1	-0.0101475
1	0.0101637
1	0.0101692
1	-0.0101748
1	0.0101774
1	0.0101798
1	-0.0101812
1	0.0101832
1	0.0101941
1	0.0101947
1	-0.0101981
1	0.0102004
1	0.0102046
1	-0.0102078
1	0.0102127
1	-0.0102196
1	-0.0102232
1	0.0102284
1	0.0102287
1	-0.0102329
1	-0.010235
1	-0.0102377
1	0.0102781
1	-0.0102844
1	-0.0102845
1	0.0103088
1	0.0103124
1	-0.0103289
1	-0.0103305
1	0.0103309
1	-0.01034
1	0.0103463
1	0.0103549
1	0.0103634
1	0.0103649
1	0.0103828
1	-0.0103838
1	-0.0103868
1	0.0103924
1	0.0103952
1	0.0103984
1	-0.0104009
1	-0.0104374
1	0.0104385
1	-0.0104402
1	0.0104413
1	-0.0104519
1	0.0104556
1	-0.0104611
1	0.0104622
1	0.0104673
1	-0.0104677
1	0.0104694
1	-0.0104711
1	-0.0104817
1	0.010509
1	0.0105133
1	0.0105239
1	0.010538
1	0.0105601
1	0.0105638
1	-0.0105669
1	0.0105682
1	-0.0106092
1	-0.0106121
1	-0.0106185
1	0.0106234
1	0.010633
1	0.0106334
1	-0.0106356
1	0.0106558
1	-0.0106575
1	-0.0106674
1	0.010671
1	0.0106718
1	0.010672
1	0.0106781
1	-0.0106781
1	-0.0106788
1	0.0106861
1	-0.0106865
1	-0.0106876
1	0.0106927
1	-0.010695
1	-0.0107057
1	-0.0107107
1	-0.0107137
1	0.0107169
1	0.0107195
1	0.0107225
1	-0.0107318
1	0.010736
1	-0.0107369
1	0.0107394
1	0.0107399
1	0.0107476
1	-0.010762
1	0.0107668
1	-0.010773
1	0.010775
1	-0.0107783
1	0.01078
1	0.0107942
1	-0.0108012
1	0.0108176
1	-0.0108187
1	-0.0108233
1	-0.0108291
1	-0.0108378
1	-0.0108398
1	-0.010842
1	-0.0108445
1	-0.0108542
1	-0.0108589
1	-0.0108793
1	-0.0108848
1	-0.010886
1	0.0108939
1	-0.0108976
1	0.0109143
1	-0.0109262
1	0.010938
1	0.0109417
1	-0.010946
1	-0.0109472
1	-0.0109478
1	0.0109498
1	0.0109548
1	0.0109563
1	-0.0109651
1	-0.0109937
1	0.0109968
1	-0.0110127
1	-0.0110137
1	-0.0110138
1	-0.0110205
1	-0.0110218
1	0.01103
1	-0.0110352
1	-0.011038
1	0.0110421
1	0.0110498
1	0.0110551
1	-0.0110589
1	-0.0110589
1	-0.0110608
1	-0.0110687
1	-0.0110694
1	-0.0110786
1	0.0110873
1	-0.0110922
1	0.0111059
1	-0.0111083
1	-0.0111117
1	0.0111183
1	-0.011135
1	0.0111458
1	-0.0111463
1	0.0111532
1	0.0111618
1	0.0111717
1	-0.0111773
1	0.0111895
1	0.0111913
1	0.0111915
1	-0.0111946
1	-0.0111976
1	-0.0111985
1	-0.0112045
1	-0.0112062
1	-0.0112068
1	0.0112131
1	-0.0112133
1	0.0112143
1	0.0112221
1	0.0112337
1	-0.011237
1	0.011239
1	-0.0112396
1	0.0112456
1	-0.0112609
1	-0.011261
1	0.0112684
1	0.011278
1	0.0112841
1	-0.0112847
1	-0.0112894
1	0.0112981
1	0.0113134
1	0.011315
1	-0.0113153
1	-0.011345
1	-0.0113452
1	0.0113564
1	0.0113663
1	-0.0113669
1	0.0113725
1	-0.0113745
1	-0.0113799
1	-0.0113849
1	-0.0113897
1	-0.0113907
1	0.011393
1	0.0114051
1	0.011447
1	0.0114476
1	-0.0114497
1	0.0114563
1	-0.0114761
1	0.0114765
1	-0.011482
1	0.0114845
1	-0.0114869
1	-0.011498
1	-0.0115086
1	-0.0115142
1	-0.0115177
1	-0.0115371
1	0.0115436
1	0.0115658
1	-0.0115743
1	0.0115756
1	0.0115769
1	0.0115805
1	0.0115965
1	-0.0116042
1	0.011614
1	0.0116225
1	-0.0116293
1	-0.0116347
1	0.0116365
1	0.0116383
1	0.0116444
1	0.0116502
1	-0.0116628
1	0.0116669
1	-0.0116743
1	-0.011675
1	0.0116756
1	0.0116758
1	0.0116815
1	0.0116861
1	-0.0116957
1	-0.0117035
1	-0.0117155
1	-0.0117243
1	-0.0117316
1	-0.0117422
1	-0.0117443
1	-0.0117444
1	-0.0117448
1	-0.0117631
1	0.0117638
1	-0.0117705
1	-0.0117738
1	0.0117867
1	0.0117886
1	0.0118008
1	-0.0118143
1	-0.0118188
1	-0.0118197
1	-0.0118204
1	0.0118285
1	-0.011842
1	0.0118439
1	-0.0118461
1	-0.0118519
1	0.0118547
1	0.0118562
1	0.0118593
1	0.0118711
1	0.0118733
1	0.0118892
1	0.0119308
1	-0.0119314
1	0.0119338
1	0.011937
1	0.0119666
1	0.011967
1	-0.0119703
1	-0.0119732
1	-0.0119789
1	-0.01198
1	0.0119807
1	-0.0119847
1	-0.0119855
1	-0.0119893
1	-0.0119952
1	0.0120065
1	-0.0120102
1	0.0120163
1	-0.0120208
1	0.0120265
1	0.0120345
1	-0.0120368
1	0.0120373
1	0.0120385
1	-0.0120413
1	0.0120415
1	0.0120582
1	-0.0120631
1	-0.0120701
1	0.0121011
1	-0.012105
1	-0.0121061
1	-0.0121103
1	0.0121129
1	-0.012116
1	0.0121234
1	-0.0121245
1	-0.0121346
1	-0.0121415
1	-0.0121453
1	-0.0121533
1	0.012156
1	-0.0121576
1	-0.0121671
1	-0.0121774
1	-0.0121811
1	0.012182
1	0.0121861
1	0.0121895
1	-0.0121903
1	-0.0121958
1	-0.0122166
1	0.0122253
1	0.0122393
1	-0.0122459
1	0.0122489
1	0.0122535
1	-0.0122538
1	0.0122544
1	-0.0122567
1	0.0122637
1	-0.0122729
1	0.0122792
1	-0.0122829
1	0.0122871
1	-0.0122934
1	-0.0122961
1	-0.0123053
1	-0.0123162
1	0.0123224
1	0.0123535
1	-0.0123699
1	0.0123772
1	0.0123891
1	0.0123966
1	0.0124028
1	-0.0124039
1	-0.0124062
1	0.0124245
1	-0.0124262
1	-0.0124321
1	0.0124426
1	-0.0124446
1	-0.0124516
1	-0.0124547
1	-0.0124568
1	0.0124584
1	0.0124605
1	-0.0124617
1	-0.0124619
1	0.0124637
1	0.0124739
1	-0.0124782
1	0.0124785
1	-0.0124795
1	0.0124796
1	0.0124887
1	0.0124992
1	-0.0125024
1	0.012504
1	-0.0125053
1	0.0125208
1	-0.0125281
1	-0.0125333
1	-0.0125365
1	-0.0125394
1	0.0125427
1	0.01255
1	-0.012551
1	-0.0125586
1	-0.0125638
1	0.0125765
1	0.0125867
1	-0.0125871
1	0.0125921
1	-0.0125922
1	-0.0125979
1	0.012603
1	0.0126032
1	-0.0126048
1	0.0126063
1	0.0126078
1	0.0126085
1	-0.012622
1	0.0126247
1	0.0126313
1	0.0126322
1	-0.0126373
1	-0.0126396
1	-0.0126408
1	-0.0126622
1	-0.0126767
1	0.0126791
1	0.0126901
1	0.012692
1	-0.0126927
1	0.0127
1	-0.0127039
1	0.0127134
1	0.0127137
1	0.0127203
1	-0.01273
1	-0.0127376
1	0.0127485
1	-0.012765
1	-0.01277
1	-0.0127794
1	0.012783
1	-0.0127878
1	0.0127883
1	0.0127895
1	0.0127954
1	0.0128015
1	0.0128039
1	0.0128102
1	-0.0128218
1	-0.0128226
1	0.0128256
1	0.0128266
1	-0.012835
1	-0.0128353
1	0.0128354
1	-0.0128529
1	0.0128562
1	-0.0128619
1	0.0128695
1	-0.0128696
1	0.0128706
1	-0.0128855
1	0.0128865
1	0.0128888
1	-0.0128915
1	0.0129005
1	0.0129005
1	0.0129079
1	0.0129109
1	0.0129111
1	0.0129113
1	-0.0129189
1	0.0129247
1	0.0129315
1	0.0129353
[truncated: 440,760+ more rows]

## Sheet: 5FdUR_UGI
Replication timing group	log2 uracil enrichment
1	-0.000100975
1	-0.000103333
1	0.000131836
1	-0.000195762
1	-0.00021976
1	0.000222697
1	0.000230741
1	0.00023305
1	0.00024751
1	0.00026364
1	-0.000277546
1	-0.000291776
1	-0.000292685
1	-0.000294932
1	0.000300568
1	0.000309303
1	0.000312381
1	-0.000341974
1	-0.000372694
1	0.000388628
1	-0.000405353
1	-0.000437654
1	0.000455662
1	-0.000459769
1	0.000469496
1	0.000471298
1	0.000491477
1	0.000495135
1	0.000497255
1	-0.00056381
1	-0.000572508
1	-0.000576888
1	-0.000607223
1	-0.000619852
1	-0.000635545
1	-0.000635545
1	0.000648599
1	-0.000655242
1	-0.000655545
1	0.000660426
1	0.000668326
1	0.000681275
1	0.000726165
1	-0.000735473
1	0.00075791
1	-0.000762215
1	0.000762885
1	0.000763368
1	-0.00076367
1	0.000769513
1	0.000779637
1	-0.000781059
1	0.000815546
1	-0.000835864
1	0.000871595
1	-0.000889347
1	-0.000903141
1	0.000910991
1	0.00092789
1	-0.000940947
1	0.000983626
1	0.000989261
1	0.000993
1	-0.00099551
1	-0.000998971
1	0.00100552
1	0.001013
1	0.00102194
1	0.00104271
1	0.00104687
1	0.00105286
1	0.00109588
1	0.00111914
1	-0.00112367
1	0.00112408
1	-0.00112962
1	0.0011413
1	-0.00119823
1	0.00120571
1	-0.00121612
1	0.0012191
1	-0.00122644
1	-0.00124397
1	-0.00125085
1	-0.00126585
1	-0.00127053
1	-0.00128843
1	0.00128941
1	0.00129496
1	-0.00129708
1	-0.00136657
1	-0.00136661
1	0.00137496
1	-0.00140004
1	-0.00143228
1	-0.00144133
1	-0.00144649
1	0.00145212
1	0.00145603
1	0.00146373
1	0.00146855
1	-0.00147306
1	0.00148112
1	-0.00148711
1	0.00153265
1	0.00154017
1	-0.00154296
1	0.00156086
1	0.00156113
1	-0.00156961
1	-0.00157912
1	-0.00162505
1	-0.00163125
1	0.00165451
1	-0.00165622
1	0.00166792
1	-0.00167154
1	0.0017037
1	-0.00170804
1	0.00171148
1	0.00171821
1	0.00172529
1	0.00175676
1	0.00177186
1	-0.00177214
1	-0.00177823
1	0.00177887
1	-0.00180235
1	-0.00180602
1	-0.00184382
1	-0.00186258
1	-0.00190552
1	-0.00190894
1	-0.00193288
1	-0.00195791
1	-0.00196031
1	-0.0019735
1	-0.00202672
1	-0.00202934
1	-0.00206439
1	0.00207531
1	-0.0021081
1	-0.00211624
1	0.00211878
1	0.00211878
1	0.00211878
1	0.00211878
1	0.00211878
1	0.00211878
1	0.00213136
1	0.00213237
1	0.00214213
1	-0.00214225
1	0.00215485
1	-0.00215882
1	-0.00218165
1	-0.00219655
1	0.00219724
1	-0.00223085
1	0.00225419
1	-0.00225481
1	0.00228595
1	0.00230283
1	-0.00233817
1	0.00234605
1	0.00234687
1	-0.00234696
1	-0.00234737
1	0.00235651
1	-0.00236284
1	-0.00237462
1	0.00237919
1	-0.00240276
1	0.00240626
1	-0.00240887
1	-0.0024418
1	0.0024558
1	-0.00246212
1	0.0024922
1	-0.00250946
1	-0.00253957
1	-0.00253957
1	-0.00254836
1	0.00256252
1	-0.00258528
1	0.00260594
1	0.00266484
1	-0.00267369
1	-0.00267532
1	-0.00267827
1	0.00268238
1	0.00269626
1	-0.00269946
1	0.0027256
1	0.00274116
1	0.00274654
1	0.00274717
1	0.00275663
1	-0.0027787
1	0.00282104
1	0.00282366
1	0.00282366
1	-0.00284004
1	-0.00284515
1	0.00284964
1	0.00287505
1	0.00289688
1	0.00289691
1	-0.00291114
1	0.0029128
1	0.00302631
1	-0.00303293
1	-0.00305793
1	-0.00306109
1	0.00306708
1	-0.00307636
1	-0.00308225
1	-0.0030887
1	0.00309213
1	-0.00309251
1	-0.0030985
1	-0.00310715
1	-0.00311422
1	-0.00311846
1	0.00312985
1	0.00313207
1	0.00317015
1	-0.00317136
1	-0.00318544
1	0.00318849
1	-0.00320591
1	-0.00324473
1	0.00325779
1	0.00326582
1	-0.00326809
1	0.00326886
1	-0.00327209
1	0.00328153
1	-0.00328568
1	-0.00334552
1	0.00334766
1	-0.00334836
1	0.003356
1	0.00337601
1	0.00338607
1	0.00339915
1	-0.00340537
1	0.00343767
1	0.00344866
1	0.00345796
1	-0.00346205
1	-0.0034872
1	-0.00349535
1	0.00350989
1	-0.00353645
1	-0.00355466
1	0.00355643
1	0.00356296
1	-0.0036145
1	0.00362189
1	-0.00364307
1	-0.00364992
1	0.00365827
1	0.00369216
1	0.00371832
1	0.00374667
1	0.00375691
1	-0.00376476
1	-0.00376477
1	0.00377278
1	0.00378349
1	0.00379295
1	-0.00380712
1	-0.00381956
1	-0.0038472
1	-0.00391602
1	-0.00391666
1	0.00391789
1	0.00392617
1	-0.00392741
1	-0.00393067
1	-0.00393551
1	-0.00395012
1	0.00395397
1	-0.00396189
1	-0.00396473
1	-0.00399327
1	-0.00401296
1	0.00401596
1	-0.00402048
1	-0.00402587
1	-0.00403056
1	0.00403073
1	0.00404695
1	-0.00405593
1	-0.00405736
1	-0.00405878
1	-0.0040606
1	-0.00406725
1	0.00406897
1	-0.00407657
1	-0.00409031
1	-0.00410007
1	0.00410592
1	0.00412868
1	-0.00414851
1	-0.00415896
1	-0.00416037
1	0.0041779
1	0.00417937
1	-0.00418132
1	-0.00422717
1	0.004248
1	-0.00426132
1	0.0042673
1	-0.00428532
1	-0.00431899
1	0.00436863
1	0.00438626
1	-0.00438782
1	-0.00439887
1	-0.00441154
1	0.00441219
1	-0.00442797
1	0.00445336
1	-0.00445489
1	-0.00446901
1	0.00449111
1	-0.00449917
1	-0.00450129
1	-0.00450444
1	-0.00450968
1	0.00452572
1	-0.00452891
1	-0.00454862
1	-0.00456016
1	-0.0045696
1	0.00462576
1	0.00462654
1	0.00466199
1	-0.00466891
1	0.0046823
1	0.00470239
1	-0.00470283
1	0.0047095
1	0.00471897
1	-0.00472683
1	0.00473297
1	0.00473732
1	0.00474508
1	0.00476816
1	-0.00476868
1	0.00478651
1	-0.00478846
1	0.00483325
1	0.00487095
1	0.00488086
1	-0.00488166
1	-0.00488227
1	-0.00489146
1	0.00493553
1	0.00494064
1	-0.00495665
1	0.00496366
1	0.00498534
1	-0.00499172
1	-0.00500968
1	0.00501309
1	0.00502612
1	-0.00502815
1	-0.00503334
1	-0.00505667
1	-0.00509488
1	-0.00510701
1	-0.00511888
1	-0.00512141
1	0.00513986
1	0.00514106
1	-0.0051536
1	-0.00516073
1	0.00516998
1	-0.0051893
1	0.00520378
1	-0.00520629
1	0.00521303
1	-0.00524753
1	-0.00525675
1	0.00527755
1	0.00528557
1	-0.00530484
1	-0.00531874
1	-0.00532852
1	-0.00532956
1	-0.00538139
1	-0.00538527
1	-0.00539852
1	-0.00541159
1	-0.00542652
1	0.00542763
1	0.00549819
1	0.00550577
1	-0.00551067
1	0.00555643
1	0.00556645
1	-0.0055696
1	0.00557161
1	0.0055725
1	0.00562975
1	0.00562983
1	0.00563405
1	0.00563997
1	0.00565481
1	-0.00570288
1	-0.00570413
1	-0.00571205
1	0.00575288
1	0.00575354
1	-0.00576968
1	-0.00577268
1	-0.00579023
1	-0.00579777
1	-0.00581709
1	-0.00584477
1	-0.00584586
1	0.00584643
1	0.00585774
1	-0.00587815
1	0.00590286
1	-0.00590908
1	-0.00591391
1	0.00594292
1	0.00596338
1	-0.00597393
1	-0.00598846
1	0.00599545
1	0.00599621
1	-0.00600129
1	-0.00602557
1	-0.00603414
1	-0.00604379
1	0.00604819
1	0.00605411
1	0.00605919
1	0.00606849
1	0.00607926
1	0.00608124
1	0.0061002
1	-0.00610756
1	0.00612026
1	0.00612625
1	-0.00614728
1	-0.00614809
1	-0.00615609
1	-0.00616775
1	-0.00617352
1	-0.00617964
1	-0.0061866
1	-0.00620118
1	-0.00620359
1	0.00621512
1	-0.00624234
1	0.00625057
1	-0.00632641
1	0.00634269
1	-0.00635527
1	-0.00636448
1	-0.00636836
1	-0.00637895
1	0.00640287
1	-0.00642538
1	-0.00642603
1	0.00645967
1	-0.00646151
1	-0.00647668
1	-0.006485
1	-0.00648626
1	-0.00649057
1	0.00649057
1	-0.00649802
1	0.00650958
1	-0.0065409
1	0.00657514
1	0.00657787
1	-0.00658487
1	-0.00658745
1	-0.00659017
1	0.00659095
1	-0.00659406
1	0.00659677
1	0.00659924
1	0.00660911
1	-0.00661619
1	-0.00663297
1	-0.00663688
1	-0.00667469
1	0.00668893
1	-0.00671901
1	0.00671965
1	0.00673068
1	-0.00673494
1	0.00673795
1	-0.0067489
1	0.00676225
1	-0.00677266
1	-0.00679715
1	0.00682765
1	0.00683521
1	0.00685461
1	-0.00686627
1	-0.00687493
1	-0.00693098
1	-0.00693538
1	0.00693758
1	0.00694779
1	-0.00694781
1	-0.00695269
1	0.0069595
1	0.00699325
1	0.00699668
1	-0.00701711
1	-0.00702866
1	-0.00706604
1	-0.00709821
1	0.00710005
1	-0.00710322
1	-0.00712124
1	0.00712547
1	0.00714147
1	-0.00715517
1	0.00718087
1	0.00719151
1	0.00719939
1	0.00722243
1	-0.00723804
1	0.0072449
1	-0.00724492
1	-0.00724926
1	-0.00726316
1	-0.00727819
1	-0.00729119
1	-0.00735413
1	-0.00735909
1	0.00736014
1	-0.00736113
1	0.0073612
1	-0.0073623
1	0.00738887
1	0.00739614
1	-0.0074086
1	0.00744008
1	0.00744944
1	-0.00746843
1	-0.00748231
1	-0.00749663
1	-0.00750862
1	-0.00752938
1	0.007542
1	-0.0075653
1	0.00756681
1	0.00759579
1	0.00759785
1	-0.00762304
1	0.00762536
1	0.00762593
1	-0.00766718
1	0.00770256
1	-0.00770446
1	-0.00771487
1	-0.00771916
1	0.00775586
1	-0.00777284
1	0.0077765
1	-0.00779387
1	0.00779436
1	-0.00780734
1	-0.00783295
1	0.00783453
1	0.00784916
1	-0.00787239
1	-0.0079066
1	-0.0079559
1	-0.00795857
1	-0.00796464
1	0.00798111
1	-0.00799604
1	-0.00799968
1	0.00801064
1	-0.00802061
1	0.00802515
1	0.00803298
1	-0.00803799
1	0.00808905
1	0.00809292
1	-0.00811593
1	-0.0081463
1	0.00815443
1	0.00815484
1	0.00816803
1	-0.00817922
1	0.00819227
1	0.00820092
1	0.00820685
1	0.00821063
1	-0.00823784
1	-0.0082696
1	0.00828923
1	-0.00829193
1	-0.00829457
1	0.00829651
1	0.00829996
1	0.00831871
1	0.00836063
1	0.00836225
1	-0.00836511
1	-0.00838698
1	-0.00838706
1	-0.00839721
1	-0.00839752
1	-0.00839758
1	-0.00840339
1	0.00841506
1	-0.00841621
1	-0.00843043
1	0.00844622
1	0.00847003
1	-0.00847216
1	-0.00848197
1	0.00849214
1	0.00856449
1	-0.00857177
1	-0.00861555
1	-0.00862181
1	-0.00862524
1	0.00862669
1	-0.00863209
1	0.00864132
1	-0.00864213
1	-0.00865112
1	0.00867131
1	-0.0086727
1	0.00867302
1	0.00869048
1	0.0087017
1	0.00871741
1	-0.00875563
1	-0.00876925
1	-0.00878852
1	-0.00879088
1	0.00881028
1	-0.00882531
1	-0.00882848
1	-0.00883501
1	-0.00884741
1	0.00885007
1	-0.00885389
1	-0.00885539
1	0.00889862
1	0.0089091
1	-0.00891021
1	0.00891796
1	-0.00892093
1	-0.00893536
1	0.00893607
1	0.00894179
1	-0.00896999
1	-0.00897302
1	-0.00898038
1	0.00898289
1	0.00899486
1	0.00902538
1	-0.00902859
1	0.00904416
1	0.00904512
1	-0.00904709
1	0.00906262
1	0.00907726
1	-0.00909148
1	0.00911661
1	-0.00913525
1	0.00915062
1	0.00915975
1	-0.00917776
1	-0.00918197
1	-0.00919321
1	0.00920715
1	0.0092202
1	-0.00922459
1	0.00923042
1	0.00928073
1	0.00929625
1	-0.0093039
1	-0.00933501
1	0.00934261
1	-0.0093525
1	-0.00935691
1	0.00937024
1	-0.00941215
1	0.00941649
1	0.00945358
1	0.00946986
1	-0.00951684
1	0.009534
1	0.00953629
1	-0.00956117
1	-0.00956333
1	0.00957091
1	0.00959789
1	-0.00959931
1	0.00964038
1	0.009686
1	-0.00968756
1	-0.00969544
1	0.0097226
1	-0.0097433
1	0.00975667
1	-0.00976071
1	-0.00976595
1	-0.00976697
1	-0.00977224
1	0.00978909
1	0.00981113
1	-0.00981982
1	0.00982356
1	-0.00982537
1	0.00986163
1	0.00987512
1	-0.00987719
1	0.00989636
1	-0.00990614
1	0.00992251
1	-0.00996818
1	-0.00997819
1	-0.00997953
1	-0.00998162
1	-0.010023
1	0.0100304
1	-0.0100338
1	-0.0100356
1	-0.0100388
1	0.0100948
1	0.010101
1	-0.0101162
1	0.0101391
1	0.0101976
1	0.0101999
1	0.0102091
1	0.0102279
1	0.0102386
1	-0.0102433
1	0.0102591
1	0.0102868
1	-0.010316
1	-0.010332
1	-0.0103461
1	-0.0103542
1	-0.0103629
1	0.0103691
1	-0.0103762
1	0.0104058
1	0.0104372
1	-0.0104839
1	-0.0105039
1	0.0105101
1	0.0105123
1	0.0105203
1	-0.0105218
1	-0.0105603
1	-0.0105623
1	0.0105654
1	-0.0105813
1	-0.0105929
1	0.0105967
1	-0.0106148
1	0.010623
1	0.0106317
1	0.0106385
1	-0.0106525
1	0.0106536
1	-0.0106622
1	-0.0106825
1	0.010698
1	-0.0107061
1	0.0107071
1	0.01071
1	0.0107118
1	-0.0107408
1	-0.0107465
1	0.0107466
1	-0.0107639
1	0.0107639
1	-0.0107873
1	-0.0107884
1	0.0108066
1	-0.0108204
1	0.0108312
1	-0.0108321
1	0.010844
1	-0.0108528
1	-0.01086
1	-0.0108775
1	-0.0108898
1	0.0109109
1	-0.0109248
1	0.0109485
1	0.0109509
1	-0.0109595
1	-0.0109897
1	0.0109963
1	0.011006
1	0.0110128
1	-0.0110201
1	0.0110541
1	0.0110777
1	0.0110853
1	-0.0110984
1	0.0111237
1	-0.0111379
1	0.0111381
1	-0.0111497
1	-0.0111679
1	-0.0111704
1	-0.0111798
1	0.0111979
1	0.0112249
1	-0.0112354
1	0.0112603
1	-0.0112658
1	-0.0112697
1	0.011282
1	-0.0112919
1	-0.0112991
1	0.0113373
1	-0.0113531
1	0.01136
1	0.0113671
1	-0.0113824
1	-0.0114071
1	-0.0114078
1	0.0114417
1	0.0114548
1	-0.0115256
1	-0.011527
1	-0.0115295
1	-0.0115376
1	-0.0115485
1	-0.0115692
1	0.0115771
1	-0.0115799
1	-0.0115821
1	-0.0115853
1	-0.0116072
1	0.0116306
1	-0.0116397
1	0.0116444
1	-0.0116548
1	-0.0116691
1	-0.0116894
1	-0.0116971
1	-0.0117214
1	0.011727
1	0.0117277
1	0.0117362
1	-0.0117432
1	-0.0117445
1	-0.0117518
1	-0.0117556
1	-0.0117825
1	-0.0118033
1	-0.011804
1	0.0118186
1	0.0118203
1	-0.0118237
1	-0.0118249
1	0.0118314
1	-0.0118394
1	-0.0118394
1	-0.0118413
1	0.0118446
1	0.0118467
1	-0.0118707
1	-0.0118708
1	0.0119076
1	-0.0119102
1	-0.0119798
1	-0.0119799
1	0.0119814
1	0.0120072
1	-0.0120073
1	-0.012013
1	-0.0120231
1	0.012036
1	-0.0120542
1	-0.0120747
1	-0.0120957
1	-0.0121016
1	-0.0121088
1	-0.0121373
1	-0.0121603
1	0.0121763
1	-0.0121764
1	0.0122023
1	-0.0122219
1	-0.0122357
1	-0.0122426
1	-0.012248
1	0.0122498
1	-0.0123157
1	-0.0123252
1	-0.0123496
1	-0.012363
1	0.0123678
1	0.0123756
1	-0.0123835
1	0.0123988
1	0.0124131
1	0.0124369
1	0.0124512
1	-0.0124636
1	-0.0124677
1	0.012478
1	-0.0124808
1	-0.0124871
1	0.0124959
1	-0.0125107
1	-0.0125112
1	0.0125117
1	-0.0125121
1	0.0125171
1	0.0125286
1	0.0125709
1	0.01258
1	-0.0125908
1	0.0126243
1	0.0126421
1	-0.0126429
1	-0.0126614
1	-0.0126873
1	-0.0127136
1	-0.0127149
1	-0.0127389
1	0.0127473
1	0.0127576
1	-0.0127792
1	0.0127841
1	-0.012806
1	0.0128415
1	0.0128486
1	0.0128561
1	0.0128628
1	-0.0128862
1	0.012932
1	-0.0129383
1	-0.0129425
1	-0.0129425
1	-0.0129513
1	-0.0130247
1	-0.0130401
1	0.0130406
1	-0.0130418
1	-0.0130603
1	-0.0130628
1	-0.0130861
1	-0.013115
1	-0.0131159
1	-0.0131223
1	-0.0131404
1	-0.0131604
1	0.0132077
1	-0.0132415
1	-0.0132469
1	0.0132494
1	-0.0132649
1	-0.0132775
1	0.0132903
1	-0.0133022
1	0.0133184
1	0.013325
1	-0.0133261
1	0.0133383
1	0.0133445
1	0.0134099
1	-0.0134527
1	-0.013457
1	-0.0134703
1	-0.013484
1	0.0134948
1	-0.0135356
1	-0.013541
1	0.0135556
1	0.013558
1	-0.0135641
1	0.0135734
1	-0.0135755
1	-0.0135786
1	0.013584
1	-0.013597
1	0.0135972
1	0.013614
1	0.0136224
1	-0.0136393
1	0.0136491
1	0.0136506
1	-0.0136629
1	0.013663
1	0.0136708
1	-0.0136791
1	-0.013688
1	-0.013689
1	0.0136906
1	0.0136929
1	-0.0137122
1	-0.0137133
1	0.0137166
1	0.0137203
1	-0.0137412
1	0.0137781
1	-0.0137786
1	-0.0137901
1	0.0138011
1	-0.0138129
1	0.0138398
1	-0.0138433
1	-0.0138643
1	0.0138732
1	0.0138786
1	-0.0138852
1	-0.0138908
1	0.0138935
1	-0.0138967
1	0.0138968
1	0.0138973
1	-0.0138977
1	-0.0139065
1	-0.0139065
1	-0.0139106
1	-0.0139123
1	0.0139191
1	-0.0139434
1	-0.0139607
1	-0.0139683
1	0.0139733
1	-0.0139975
1	-0.0140095
1	0.0140179
1	-0.0140179
1	0.0140374
1	-0.0140384
1	0.0140401
1	-0.0140675
1	0.0140687
1	-0.0140697
1	0.0140725
1	-0.0140864
1	-0.0141395
1	0.0141436
1	-0.0141621
1	0.0141694
1	-0.0141772
1	0.0141807
1	-0.0141975
1	0.0142515
1	0.0142538
1	0.0142618
1	0.0142736
1	-0.0143481
1	-0.014366
1	-0.0143666
1	-0.0143794
1	0.0144003
1	-0.0144045
1	-0.0144115
1	-0.0144216
1	-0.0144404
1	-0.0144546
1	-0.0145049
1	-0.0145277
1	0.014528
1	0.0145472
1	-0.0145503
1	-0.0145816
1	-0.0146063
1	0.0146179
1	-0.0146271
1	0.0146341
1	0.0146344
1	-0.014649
1	0.0146493
1	-0.0146559
1	-0.0146824
1	0.0146939
1	-0.0147029
1	0.0147144
1	0.0147421
1	0.0147474
1	0.0147497
1	0.0147519
1	0.0147651
1	-0.0148
1	-0.0148148
1	-0.0148172
1	0.0148241
1	-0.0148246
1	0.0148348
1	0.0148432
1	0.0148512
1	-0.0148567
1	0.0148593
1	-0.0148874
1	0.0148889
1	0.0149097
1	0.0149115
1	0.0149144
1	-0.0149214
1	-0.014946
1	-0.0149763
1	0.014984
1	-0.0150004
1	-0.0150156
1	0.0150278
1	-0.015047
1	-0.0150531
1	-0.0150677
1	-0.0150914
1	-0.0151352
1	0.0151446
1	-0.015197
1	-0.0151995
1	-0.015211
1	0.0152196
1	-0.01522
1	-0.0152222
1	0.0152325
1	-0.015276
1	-0.0152803
1	-0.0152805
1	-0.0153214
1	0.0153248
1	-0.0153344
1	0.0153405
1	-0.015344
1	-0.0153685
1	-0.0154081
1	-0.0154101
1	0.0154278
1	-0.0154291
1	-0.0154291
1	0.0154421
1	0.0154532
1	-0.0154584
1	-0.015459
1	-0.0154593
1	-0.0154679
1	-0.015477
1	0.0155087
1	0.0155167
1	-0.0155201
1	-0.0155244
1	-0.0155506
1	-0.0155532
1	-0.0155724
1	0.0155758
1	-0.0155766
1	0.0156195
1	0.0156462
1	0.0156685
1	0.0156689
1	0.0157101
1	-0.0157335
1	-0.0157481
1	0.0157509
1	-0.0157706
1	0.0157834
1	-0.015812
1	0.0158306
1	-0.0158323
1	-0.0158356
1	0.015933
1	-0.0159435
1	-0.0159663
1	0.0160028
1	0.0160033
1	0.0160144
1	0.0160353
1	0.0160436
1	-0.0160444
1	-0.0160495
1	0.0160501
1	-0.0160507
1	0.0160803
1	-0.0160895
1	0.016091
1	-0.0160978
1	-0.0161266
1	-0.0161269
1	-0.0161605
1	-0.0161805
1	-0.0162104
1	-0.0162202
1	-0.0162373
1	0.0162439
1	-0.0162505
1	-0.01626
1	-0.0162785
1	0.0162863
1	-0.016287
1	0.0162905
1	0.0163078
1	-0.0163244
1	-0.0163297
1	-0.0163392
1	-0.0163729
1	0.0163942
1	-0.016411
1	0.016428
1	0.016432
1	-0.0164326
1	-0.0164396
1	-0.0164462
1	-0.0164564
1	0.016479
1	-0.0164852
1	0.0164854
1	0.0165082
1	0.0165182
1	-0.0165183
1	-0.0165221
1	-0.0165299
1	-0.0165324
1	0.0165879
1	-0.016589
1	-0.0166096
1	0.0166217
1	0.0166306
1	-0.016639
1	-0.0166678
1	-0.0166747
1	-0.0166806
1	0.0166948
1	-0.0167396
1	-0.0167437
1	-0.0167698
1	0.0167787
1	-0.0168088
1	-0.0168184
1	-0.0168252
1	-0.0168272
1	-0.0168466
1	0.0168592
1	-0.0168714
1	-0.0168734
1	-0.0168827
1	0.0168923
1	0.0169019
1	-0.0169196
1	0.0169206
1	0.016953
1	-0.01699
1	-0.0170013
1	-0.0170158
1	-0.0170658
1	-0.0170854
1	0.0170999
1	-0.0171144
1	0.0171391
1	0.017146
1	-0.0171488
1	0.0171531
1	-0.0172273
1	0.0173268
1	-0.0173298
1	-0.0173338
1	0.017337
1	-0.0173407
1	-0.0173557
1	-0.0173962
1	-0.0174116
1	0.017415
1	0.0174177
1	0.0174335
1	0.017443
1	-0.017453
1	0.0174531
1	-0.0174592
1	-0.0174684
1	0.0174782
1	0.0174824
1	-0.0174994
1	0.0175165
1	-0.0175227
1	0.0175255
1	0.0175347
1	-0.0175458
1	0.0175478
1	0.0175733
1	-0.0175798
1	-0.0175875
1	0.0175886
1	-0.0175892
1	0.017592
1	0.0176156
1	-0.0176248
1	0.0176317
1	-0.0176453
1	0.0176747
1	-0.0176753
1	-0.0176846
1	0.0176957
1	0.0177013
1	0.0177018
1	0.0177192
1	-0.0177365
1	0.0177478
1	0.0177731
1	-0.0178051
1	-0.0178085
1	0.0178191
1	-0.0178227
1	-0.0178281
1	-0.0178346
1	-0.0178384
1	0.0178616
1	0.0178621
1	-0.0178757
1	-0.0178844
1	-0.0178864
1	-0.0179037
1	0.0179088
1	-0.0179419
1	-0.017955
1	-0.0179642
1	-0.0179642
1	-0.0179814
1	0.0179844
1	-0.0180273
1	-0.0180314
1	0.0180397
1	-0.0180401
1	-0.0180417
1	-0.0180682
1	-0.01808
1	-0.01809
1	-0.0180925
1	-0.0181241
1	0.0181279
1	0.0181324
1	-0.0181548
1	-0.0181859
1	-0.0182088
1	0.0182132
1	-0.0182171
1	-0.0182331
1	-0.0182627
1	0.0182669
1	0.0182772
1	-0.018282
1	-0.0182872
1	-0.0183017
1	-0.0183046
1	-0.0183314
1	0.0183376
1	0.0183441
1	0.0183475
1	-0.0183546
1	-0.0183551
1	0.0183616
1	-0.0184113
1	0.0184142
1	0.0184368
1	-0.0184449
1	0.0184546
1	-0.0184556
1	-0.0184597
1	0.0184724
1	-0.0184805
1	0.0184966
1	-0.0184985
1	-0.0185111
1	-0.0185162
1	-0.0185278
1	0.0185335
1	-0.0185558
1	-0.0185606
1	-0.0185611
1	-0.0185773
1	-0.0185912
1	0.0186026
1	0.0186323
1	-0.0186549
1	-0.0186605
1	-0.0187064
1	-0.0187105
1	-0.0187163
1	-0.0187227
1	0.018733
1	-0.0187601
1	-0.0187736
1	-0.0187847
1	0.0187935
1	0.0188027
1	0.0188168
1	-0.0188184
1	0.018822
1	0.0188261
1	-0.0188266
1	-0.0188422
1	0.018849
1	-0.0188684
1	0.0188872
1	-0.0188903
1	-0.0189062
1	-0.0189179
1	-0.0189202
1	-0.0189474
1	-0.0189638
1	-0.0189687
1	-0.018984
1	0.0190224
1	-0.0190616
1	-0.0190623
1	-0.0191248
1	0.0191349
1	0.0191608
1	0.0191765
1	0.0192209
1	0.0192227
1	0.0192352
1	0.0192356
1	0.0192459
1	0.0192731
1	0.0192763
1	-0.0192824
1	-0.0192913
1	-0.0193087
1	-0.0193392
1	-0.0193394
1	-0.0193436
1	-0.0193445
1	0.0193513
1	-0.0193595
1	-0.0193612
1	-0.0193775
1	0.0193914
1	0.0194011
1	-0.0194108
1	-0.0194426
1	0.0194463
1	-0.0194465
1	-0.0194545
1	-0.0194587
1	0.0195062
1	-0.019531
1	-0.0195447
1	-0.0195605
1	-0.0195932
1	-0.0196041
1	-0.0196172
1	-0.0196239
1	0.0196876
1	-0.0197197
1	-0.0197201
1	-0.0197231
1	0.019727
1	0.0197455
1	0.0197897
1	-0.0197902
1	0.0198438
1	0.0198697
1	-0.0198766
1	-0.0198846
1	-0.0198894
1	0.0199034
1	-0.0199039
1	-0.0199078
1	0.0199488
1	0.0199688
1	-0.0199717
1	0.0199867
1	-0.0199902
1	0.020019
1	0.0200326
1	0.0200675
1	-0.0200793
1	0.0200824
1	0.0201044
1	-0.0201079
1	0.0201154
1	-0.0201223
1	-0.0201582
1	-0.0201708
1	-0.0201793
1	-0.0202062
1	-0.0202074
1	-0.0202177
1	0.0202224
1	0.0202472
1	-0.0202645
1	-0.0203283
1	0.0203333
1	-0.0203367
1	-0.0203661
1	-0.0203732
1	-0.0203787
1	-0.0203833
1	0.0203951
1	0.0204097
1	0.0204142
1	-0.0204333
1	0.0204549
1	0.0204736
1	0.0204806
1	0.0204897
1	0.0204994
1	-0.0205328
1	-0.0205398
1	-0.0205593
1	-0.0205681
1	-0.0206062
1	-0.0206094
1	-0.0206763
1	0.0206925
1	-0.0206987
1	-0.0207121
1	-0.0207159
1	-0.0207229
1	0.0207279
1	0.0207313
1	-0.0207342
1	0.020744
1	-0.0207511
1	-0.0207706
1	0.0207905
1	0.0207934
1	-0.0208059
1	-0.0208278
1	0.0208298
1	-0.0208366
1	-0.0208399
1	-0.0208478
1	-0.0208643
1	-0.0208704
1	-0.0208867
1	0.0209335
1	-0.0209368
1	-0.0209814
1	0.020998
1	-0.0210488
1	-0.0210511
1	-0.0210614
1	-0.0210777
1	-0.0211049
1	0.0211214
1	-0.0211448
1	-0.0211638
1	0.0211807
1	0.0211815
1	0.0211869
1	0.021188
1	-0.0211894
1	0.0211907
1	0.0211998
1	-0.0212059
1	-0.0212171
1	-0.0212284
1	-0.0212573
1	0.0212769
1	-0.0212792
1	0.0213063
1	-0.0213413
1	-0.0213454
1	-0.0213628
1	0.0213671
1	-0.0213715
1	-0.0213739
1	-0.0213851
1	-0.02139
1	0.0214003
1	-0.021439
1	-0.0214485
1	0.0214548
1	0.0214549
1	-0.0214616
1	0.0214744
1	-0.0214785
1	-0.0214874
1	-0.0214927
1	-0.0215363
1	-0.0215419
1	-0.0215772
1	0.0215777
1	0.0215993
1	-0.0216294
1	0.0216624
1	-0.0216904
1	0.0216979
1	-0.0217048
1	-0.0217119
1	0.021716
1	-0.0217173
1	0.0217245
1	-0.0217368
1	-0.0217449
1	-0.0217592
1	-0.0217602
1	-0.0217684
1	-0.0217806
1	-0.021791
1	-0.0217971
1	-0.0218016
1	0.0218143
1	0.0218204
1	-0.0218206
1	-0.0218236
1	0.0218271
1	0.0218399
1	-0.0218507
1	0.0218615
1	-0.021867
1	-0.0218821
1	0.0218949
1	-0.0218979
1	0.0219133
1	-0.0219138
1	-0.0219242
1	-0.021927
1	-0.0219304
1	0.0219408
1	-0.021954
1	-0.021966
1	0.022015
1	-0.0220184
1	-0.0220699
1	0.0220808
1	-0.0220821
1	-0.0220888
1	0.0220951
1	0.022099
1	0.0221461
1	-0.0221721
1	-0.0221839
1	-0.0221877
1	0.0221954
1	0.0221978
1	-0.0222169
1	-0.0222276
1	-0.0222279
1	-0.022247
1	-0.0222512
1	-0.0222619
1	-0.022272
1	0.0222799
1	0.0222806
1	0.0223282
1	-0.0223328
1	0.0223403
1	-0.0223904
1	0.022406
1	-0.0224096
1	-0.0224175
1	-0.0224176
1	-0.0224264
1	-0.0224415
1	0.02246
1	0.0224644
1	0.0224699
1	0.0224805
1	0.0224833
1	0.0224852
1	0.0225048
1	-0.0225078
1	-0.0225091
1	0.022514
1	-0.02254
1	-0.022563
1	-0.0225711
1	-0.0226125
1	-0.0226168
1	-0.0226442
1	0.0226454
1	-0.0226596
1	0.0226656
1	0.0226685
1	-0.0226743
1	0.0226766
1	0.0226909
1	-0.0226966
1	-0.0227064
1	0.0227116
1	-0.0227181
1	0.022719
1	-0.0227204
1	-0.0227218
1	-0.0227245
1	-0.0227326
1	-0.0227453
1	0.0227679
1	-0.0227698
1	-0.0227773
1	0.0227804
1	-0.022789
1	-0.0228029
1	-0.0228098
1	-0.0228319
1	-0.0228384
1	-0.0228539
1	0.0228869
1	0.0228968
1	0.0228987
1	0.0229095
1	-0.0229355
1	0.0229378
1	0.0229562
1	-0.0229874
1	-0.023024
1	0.0230316
1	-0.0230373
1	-0.0230378
1	-0.0230407
1	-0.0230539
1	-0.0230749
1	-0.0230809
1	-0.0230902
1	-0.0231013
1	-0.0231141
1	-0.0231188
1	-0.0231367
1	0.0231384
1	0.023169
1	-0.0231741
1	-0.0231751
1	-0.0231945
1	0.0232014
1	-0.0232255
1	-0.0232333
1	-0.0232535
1	-0.0232576
1	-0.0232721
1	-0.0232805
1	-0.0232891
1	-0.0232983
1	0.0233033
1	-0.0233143
1	0.02334
1	0.0233425
1	-0.0233629
1	0.0233884
1	0.0233927
1	0.0234092
1	0.0234122
1	0.0234137
1	0.0234175
1	0.0234272
1	-0.0234273
1	0.023435
1	-0.0234609
1	0.0234736
1	0.0234771
1	-0.0234784
1	0.0235007
1	0.0235131
1	-0.0235222
1	-0.0235263
1	-0.0235359
1	-0.0235456
1	-0.0235784
1	-0.0235932
1	-0.0235962
1	-0.0235967
1	0.0236048
1	-0.0236097
1	-0.0236104
1	0.0236202
1	-0.0236272
1	0.0236304
1	-0.0236688
1	0.0237205
1	0.0237351
1	0.0237652
1	0.0237654
1	-0.0237751
1	0.0237798
1	0.0237868
1	-0.0238077
1	0.0238186
1	-0.0238279
1	-0.0238292
1	-0.0238307
1	-0.0238328
1	0.0238486
1	-0.0238496
1	0.0238572
1	0.023859
1	-0.0238968
1	-0.0239007
1	0.0239267
1	0.0239447
1	-0.0239625
1	-0.0239737
1	0.0239935
1	-0.0240028
1	0.0240066
1	0.0240213
1	0.0240272
1	-0.024031
1	0.0240359
1	-0.024069
1	-0.0240983
1	-0.0240994
1	-0.0241208
1	-0.0241265
1	-0.0241467
1	-0.0241673
1	-0.0241711
1	0.0242239
1	-0.0242285
1	-0.0242392
1	-0.0242423
1	-0.0242536
1	-0.0242537
1	-0.0242616
1	-0.0242662
1	-0.0242684
1	-0.0242747
1	-0.0242789
1	0.0242927
1	-0.0243193
1	-0.0243416
1	-0.0243472
1	-0.0243478
1	-0.0243578
1	-0.0243601
1	-0.0243652
1	0.0243755
1	-0.0244058
1	-0.0244075
1	-0.0244133
1	0.0244149
1	-0.0244494
1	-0.0244498
1	-0.0244505
1	0.0244577
1	0.0244642
1	-0.024466
1	0.0244709
1	-0.0244861
1	0.0245037
1	-0.0245173
1	-0.0245219
1	-0.0245394
1	0.0245643
1	0.0245655
1	-0.0246206
1	0.0246274
1	-0.0246382
1	-0.0246701
1	0.0247011
1	0.0247068
1	-0.0247156
1	-0.0247163
1	0.0247213
1	0.0247253
1	0.0247425
1	-0.0247468
1	0.0247473
1	-0.0247486
1	-0.0247557
1	-0.0247718
1	-0.0247845
1	-0.0247973
1	0.0248429
1	-0.0248767
1	-0.0248997
1	-0.0249275
1	-0.0249487
1	-0.0249489
1	0.0249533
1	0.024957
1	0.0249727
1	-0.0250004
1	-0.0250201
1	-0.0250279
1	-0.0250892
1	-0.025159
1	-0.0251739
1	-0.0251801
1	-0.0251991
1	-0.025202
1	-0.0252211
1	-0.0252285
1	-0.0252309
1	0.0252475
1	0.0252528
1	-0.0252548
1	0.0252643
1	-0.0252963
1	0.0253033
1	-0.0253174
1	0.0253257
1	0.0253336
1	0.0253396
1	-0.0253416
1	-0.0253533
1	-0.0253718
1	-0.0253846
1	0.0254351
1	0.0254369
1	0.0254627
1	0.0254628
1	0.0254809
1	-0.0254825
1	-0.0254846
1	-0.0254911
1	0.025494
1	-0.0255047
1	-0.0255268
1	-0.0255395
1	-0.0255639
1	-0.0255848
1	-0.0255955
1	0.0256228
1	-0.0256248
1	-0.0256433
1	0.0256505
1	0.0256583
1	-0.0256705
1	-0.0256862
1	-0.0256868
1	-0.0256907
1	-0.0257386
1	-0.0257444
1	0.0257667
1	-0.0257915
1	-0.0258046
1	-0.0258111
1	-0.0258117
1	0.0258329
1	-0.0258339
1	0.0258794
1	0.0258938
1	0.0258971
1	-0.025902
1	0.0259202
1	0.0259254
1	-0.0259419
1	-0.0259493
1	0.0259541
1	0.0259566
1	0.0259851
1	-0.0259877
1	-0.0259975
1	0.026005
1	-0.026006
1	0.0260234
1	-0.0260355
1	-0.0260537
1	-0.0260571
1	-0.0260761
1	-0.0260833
1	0.0260869
1	-0.0260872
1	-0.0260887
1	-0.02609
1	0.0261236
1	-0.0261346
1	-0.0261356
1	-0.0261392
1	0.0261469
1	-0.0261932
1	-0.0261933
1	-0.0261935
1	-0.0262096
1	0.0262454
1	-0.0262623
1	-0.0263116
1	0.0263166
1	-0.0263397
1	-0.0263414
1	-0.0263481
1	-0.0263546
1	-0.0263562
1	-0.0263581
1	-0.0263634
1	-0.0263711
1	-0.0263795
1	0.0263848
1	-0.0263995
1	0.0264047
1	0.0264279
1	0.0264317
1	-0.0264867
1	-0.0265746
1	-0.0265748
1	-0.026579
1	-0.0265802
1	0.0265991
1	0.0266294
1	0.02663
1	0.026635
1	-0.0266416
1	-0.0266491
[truncated: 440,584+ more rows]

## Sheet: K562_Shu
Replication timing group	log2 uracil enrichment
1	0.000114106
1	0.000119578
1	0.000120607
1	-0.000120973
1	-0.000129473
1	0.000130506
1	0.000137226
1	0.000141466
1	-0.000143364
1	0.000146656
1	0.00014981
1	-0.000163544
1	-0.000165725
1	0.000170696
1	0.000171431
1	-0.000173046
1	0.000180917
1	-0.000181753
1	0.000182083
1	-0.000194955
1	-0.000195877
1	0.000203585
1	-0.000205555
1	-0.000208431
1	0.000208919
1	-0.000209375
1	-0.000209831
1	-0.000210542
1	0.000221692
1	0.000224119
1	-0.000224418
1	-0.000230341
1	-0.000230836
1	-0.000231481
1	0.000233399
1	-0.000233699
1	-0.000234556
1	0.000240157
1	0.000242446
1	0.000245771
1	-0.000246079
1	-0.000246279
1	-0.0002486
1	0.00025206
1	-0.000252953
1	-0.000253574
1	-0.000258777
1	-0.00026019
1	0.000264319
1	0.000266939
1	-0.000268825
1	-0.000270992
1	-0.00027311
1	0.000278059
1	0.000280339
1	-0.000286391
1	0.000286891
1	-0.000290785
1	-0.000295784
1	0.000306452
1	0.000312345
1	0.000313308
1	-0.000316934
1	0.000320523
1	0.000327284
1	-0.000329516
1	-0.000330842
1	0.00034225
1	-0.000347829
1	0.000352986
1	0.000357947
1	0.000362166
1	-0.000362196
1	-0.000362643
1	-0.000366042
1	-0.00036782
1	-0.000370722
1	-0.000377523
1	-0.000380803
1	-0.000381131
1	0.00038133
1	0.000384075
1	-0.000385135
1	0.000387705
1	0.000387806
1	-0.000388549
1	0.000394066
1	0.00039928
1	0.000400754
1	-0.000400796
1	0.000403653
1	-0.000404881
1	-0.000405853
1	0.000413787
1	0.000416169
1	-0.000419491
1	-0.000419716
1	-0.000426211
1	0.000431357
1	0.000433582
1	-0.000436945
1	-0.000439746
1	0.00044008
1	-0.000440182
1	0.000441748
1	0.000442294
1	-0.000444119
1	-0.000445448
1	0.000446278
1	0.000446549
1	0.000449019
1	0.000457421
1	-0.000462191
1	0.000464592
1	-0.000468774
1	-0.000479499
1	0.000481854
1	-0.000483373
1	-0.00049502
1	-0.000497511
1	0.000501167
1	0.000504973
1	0.000505806
1	0.000516318
1	0.00052038
1	-0.000526278
1	0.000529519
1	-0.000530755
1	-0.000531638
1	-0.000536728
1	-0.000555106
1	0.000555382
1	0.000564081
1	0.000586184
1	0.000588622
1	0.000591231
1	-0.000593092
1	0.000595541
1	-0.000596079
1	0.000599214
1	0.000604886
1	0.000609972
1	0.000611016
1	-0.000611578
1	0.000616987
1	0.000617233
1	-0.000618285
1	-0.00062052
1	-0.00062177
1	0.000630577
1	-0.000635988
1	0.000637484
1	-0.000640041
1	0.000641474
1	-0.000643385
1	0.000643928
1	0.000645456
1	-0.000645837
1	0.000651681
1	-0.000657347
1	0.000657644
1	0.00066057
1	0.000665167
1	-0.000669348
1	-0.000669876
1	0.000672522
1	0.000672664
1	-0.00067269
1	0.00067371
1	-0.000679029
1	-0.000683435
1	-0.000690913
1	-0.000693443
1	-0.000696267
1	-0.000699055
1	0.000704224
1	-0.000714688
1	0.000720609
1	-0.000722435
1	0.000723918
1	-0.000730493
1	-0.000731205
1	0.000735783
1	0.000737121
1	0.000737566
1	-0.000742609
1	0.000744582
1	-0.000746501
1	-0.000751577
1	-0.000756952
1	-0.000758775
1	-0.000758971
1	-0.00076143
1	0.000762585
1	-0.000762699
1	-0.000764765
1	0.000772774
1	-0.000773484
1	-0.000777182
1	0.00077812
1	0.000779063
1	0.000779451
1	-0.000781328
1	-0.000783566
1	-0.00078778
1	-0.000790896
1	0.000802406
1	0.000802449
1	-0.000804325
1	-0.000805376
1	-0.000805437
1	-0.000805514
1	0.000805908
1	0.000807032
1	0.000808455
1	0.000809184
1	0.000811433
1	-0.000814398
1	0.000815713
1	-0.000820943
1	-0.000824173
1	-0.000828367
1	-0.000831709
1	-0.000831864
1	-0.000833166
1	0.000839313
1	0.000842184
1	0.000845955
1	-0.000847093
1	0.000847545
1	-0.000849579
1	-0.000854545
1	0.000857216
1	0.000857538
1	-0.000858432
1	0.00086006
1	-0.000860882
1	0.000864701
1	0.000870843
1	0.00087341
1	0.000873545
1	-0.000881677
1	-0.000884228
1	-0.00088475
1	0.000885966
1	0.000887838
1	0.00088921
1	-0.000889538
1	0.000892922
1	0.000905322
1	0.000907948
1	0.000912026
1	-0.000914519
1	-0.000915273
1	-0.000934919
1	-0.000939849
1	-0.000942784
1	0.000943031
1	0.000944485
1	0.000949541
1	-0.000953133
1	0.000960277
1	0.000960471
1	-0.000979102
1	-0.000984148
1	-0.000985313
1	0.000986976
1	-0.000991046
1	-0.00099125
1	-0.000992482
1	0.000994641
1	0.000996049
1	0.00100039
1	0.00100517
1	0.00100525
1	-0.0010093
1	-0.00101142
1	-0.00102479
1	0.00102895
1	-0.00103421
1	-0.00103828
1	0.00103847
1	-0.00103881
1	0.00104083
1	-0.00104602
1	-0.00104738
1	0.00105111
1	-0.00105355
1	-0.00105528
1	-0.00105615
1	-0.0010615
1	-0.00106455
1	0.00106475
1	-0.00106554
1	-0.00107274
1	0.00107293
1	0.00107991
1	0.00109017
1	-0.00109407
1	-0.00109434
1	0.00109619
1	0.00109833
1	0.00110063
1	-0.00110488
1	0.00110709
1	-0.00113117
1	0.00113207
1	0.00114103
1	-0.00114351
1	-0.00114362
1	0.00114667
1	0.00115534
1	-0.00116057
1	-0.00118289
1	0.00119061
1	-0.00119377
1	-0.00119624
1	0.00119805
1	0.00120096
1	0.00120196
1	-0.00120248
1	-0.00120572
1	0.00120721
1	-0.00120724
1	-0.00121464
1	-0.00121756
1	0.00121814
1	0.00122191
1	-0.00122763
1	0.00122838
1	0.00122937
1	0.00123211
1	-0.00123371
1	-0.00123958
1	-0.00124066
1	-0.00124268
1	0.00124493
1	-0.00124518
1	-0.00124796
1	-0.00125014
1	0.00125223
1	0.0012525
1	-0.00126053
1	0.00126185
1	0.00127397
1	-0.00127649
1	0.00127685
1	-0.00127951
1	-0.00128154
1	0.00128229
1	0.00128321
1	-0.00128738
1	0.00129651
1	-0.00129743
1	0.00129973
1	0.00130028
1	-0.0013007
1	-0.0013017
1	0.00130479
1	0.00130847
1	0.00131157
1	-0.00131248
1	-0.00131621
1	-0.00131642
1	-0.00132649
1	0.00133296
1	-0.00133315
1	0.00133475
1	0.00133805
1	0.00134609
1	0.00134794
1	-0.00134953
1	0.00135075
1	-0.00135134
1	-0.00135834
1	0.00136069
1	-0.00136423
1	-0.00136643
1	-0.00136661
1	-0.00136706
1	-0.00137756
1	0.001382
1	0.0013912
1	0.00139517
1	-0.00139817
1	-0.00139922
1	-0.00140001
1	-0.00140075
1	-0.00140499
1	-0.00141422
1	-0.00141686
1	0.00142303
1	0.00142527
1	-0.00142883
1	-0.00143088
1	-0.00143149
1	0.00143675
1	0.00143703
1	-0.0014408
1	0.00144087
1	0.0014438
1	0.00144667
1	0.00145166
1	0.00145416
1	0.00145883
1	-0.00145933
1	-0.00147835
1	0.0014871
1	-0.0014941
1	-0.00149517
1	0.00149706
1	-0.00150082
1	0.00150094
1	0.00150477
1	0.00150477
1	-0.00150586
1	-0.0015085
1	-0.0015097
1	0.00151075
1	0.00151395
1	-0.00151404
1	-0.0015142
1	-0.00151528
1	-0.00151973
1	-0.00152097
1	0.0015253
1	-0.00153067
1	0.00153419
1	0.00154043
1	0.00154119
1	-0.00154506
1	0.00154589
1	-0.00154751
1	0.00154814
1	0.00155545
1	-0.00155663
1	0.00155764
1	-0.00155853
1	-0.00156064
1	-0.00156072
1	-0.00156076
1	0.00157128
1	0.00157328
1	-0.00157882
1	0.00158049
1	-0.0015819
1	0.00158376
1	-0.00158846
1	-0.0015923
1	0.00159314
1	0.00160084
1	-0.00160319
1	-0.00160366
1	0.00160522
1	0.00160555
1	0.00160813
1	-0.00162272
1	-0.00162312
1	0.00162717
1	-0.00162738
1	0.00162769
1	0.00162821
1	-0.00163326
1	-0.00163489
1	0.00163722
1	-0.00164358
1	-0.00164954
1	-0.00165335
1	-0.00165784
1	-0.00166102
1	-0.0016615
1	0.00167185
1	-0.00167465
1	0.00167602
1	0.00167883
1	0.00169176
1	0.00169994
1	-0.00171099
1	0.00171388
1	-0.00171944
1	-0.00172159
1	-0.00172296
1	-0.00172308
1	-0.00172464
1	0.00172602
1	0.00173033
1	0.00173124
1	0.00173159
1	0.00173208
1	-0.00173216
1	-0.00173252
1	0.00173352
1	0.00174
1	-0.00174116
1	0.001743
1	0.0017445
1	-0.0017446
1	-0.00175217
1	0.00175416
1	-0.00175619
1	0.00175729
1	-0.00175996
1	0.00176012
1	0.00176061
1	-0.00176232
1	0.00176502
1	-0.00176785
1	-0.00176847
1	-0.00176933
1	-0.00177315
1	0.00177717
1	-0.00178158
1	-0.00178526
1	-0.00178629
1	0.00178696
1	-0.00179315
1	-0.00179635
1	0.0018031
1	0.00180664
1	0.00180676
1	-0.00180724
1	0.00181614
1	-0.00183036
1	-0.00183098
1	0.00183207
1	0.00183547
1	-0.00184138
1	0.00184315
1	0.00185674
1	-0.00185829
1	0.00185983
1	0.00185983
1	0.00186394
1	0.00186531
1	0.00186591
1	0.00186658
1	-0.00186662
1	0.00186786
1	-0.00186948
1	-0.00187395
1	0.00187888
1	-0.00187905
1	-0.00188876
1	0.00188885
1	-0.00189193
1	-0.00189399
1	-0.00189514
1	0.00189685
1	-0.0019014
1	-0.00191087
1	0.0019114
1	-0.00191822
1	0.00192167
1	0.0019235
1	-0.00192476
1	0.00192494
1	0.00192531
1	-0.00193477
1	-0.00193515
1	-0.00193569
1	0.00194418
1	0.00194521
1	-0.0019481
1	0.00195104
1	-0.00195195
1	0.00195522
1	0.0019575
1	0.00195857
1	-0.00196284
1	-0.00196481
1	0.00196698
1	-0.00197071
1	-0.00197075
1	-0.00197426
1	-0.00197584
1	0.00197807
1	0.00198503
1	-0.00198862
1	-0.00199246
1	0.00199261
1	0.00199354
1	-0.00199562
1	0.0019977
1	0.00199858
1	-0.00199896
1	-0.00201156
1	0.0020131
1	0.00201605
1	-0.00202439
1	-0.00202454
1	-0.00202497
1	0.00202615
1	-0.00203102
1	-0.0020323
1	0.00203316
1	-0.00203583
1	-0.00204081
1	-0.00204262
1	-0.00204271
1	0.0020568
1	0.00205744
1	-0.00206044
1	0.00206349
1	-0.00206421
1	0.00207228
1	-0.00207392
1	-0.00207495
1	0.00208065
1	-0.00208474
1	0.00208805
1	0.00208861
1	-0.00208875
1	0.00209347
1	0.00209405
1	0.00210503
1	0.00210637
1	0.00210663
1	0.00210799
1	-0.00211056
1	-0.00211119
1	0.00211469
1	-0.00212173
1	-0.00212535
1	0.00212733
1	-0.00212767
1	-0.00212904
1	-0.00213845
1	0.00213886
1	0.00214005
1	0.00214094
1	0.00214125
1	0.00215407
1	0.00215441
1	-0.00215841
1	0.0021625
1	0.00216508
1	0.00217451
1	0.00218178
1	-0.00218335
1	0.00218578
1	0.00218875
1	-0.00218906
1	-0.002191
1	-0.00219107
1	0.00219677
1	0.00219975
1	-0.00220146
1	0.00220301
1	-0.00220899
1	0.00221372
1	-0.00221678
1	-0.00222184
1	-0.00222868
1	-0.00222912
1	0.00222922
1	-0.00223175
1	-0.00223729
1	0.002245
1	-0.00224912
1	-0.00225465
1	-0.00225624
1	0.00225635
1	-0.00225917
1	-0.00226305
1	0.00226549
1	-0.00226668
1	-0.00226881
1	-0.00227308
1	0.00227609
1	0.00228273
1	-0.00228856
1	-0.00228917
1	-0.00229112
1	0.00229821
1	-0.00230204
1	0.00230823
1	0.00230907
1	0.00231736
1	-0.00232089
1	0.00232676
1	0.00233714
1	-0.00234061
1	0.00234257
1	0.00234689
1	-0.0023474
1	0.00235562
1	-0.00235814
1	-0.00235927
1	0.00236598
1	0.00236915
1	-0.00237125
1	-0.00238103
1	-0.0023863
1	0.00238796
1	-0.00238894
1	-0.00239234
1	-0.00239617
1	-0.00240007
1	-0.0024046
1	-0.00241204
1	0.0024147
1	0.00241503
1	0.00241612
1	0.00241764
1	0.00242144
1	-0.00242519
1	-0.00242704
1	-0.00243322
1	0.00243661
1	-0.00243932
1	-0.00244025
1	-0.00244436
1	-0.00244633
1	0.00244722
1	-0.00244793
1	0.00245235
1	-0.00245528
1	0.00245759
1	0.00246098
1	0.00246114
1	0.00248046
1	-0.00248175
1	-0.00248387
1	0.00248483
1	-0.00248784
1	0.00249586
1	0.00251123
1	0.00251169
1	-0.00251554
1	0.00251572
1	0.00251722
1	0.00252278
1	0.00253043
1	0.00254032
1	-0.00254849
1	0.00254898
1	0.0025511
1	-0.00255433
1	-0.00255633
1	0.00255806
1	-0.00256161
1	-0.00257677
1	-0.00257908
1	-0.00258436
1	-0.00258753
1	-0.00258753
1	-0.00259779
1	-0.00259924
1	-0.00260253
1	0.00260526
1	0.00260779
1	0.0026124
1	0.00262307
1	-0.00262405
1	-0.00262777
1	0.0026292
1	0.00263282
1	-0.00264049
1	-0.00264169
1	-0.00264203
1	0.00264234
1	-0.00264748
1	0.00264942
1	-0.00265065
1	-0.00265356
1	-0.00265599
1	0.00265693
1	0.00265881
1	-0.00267181
1	0.00267191
1	0.00267337
1	0.00267444
1	0.00267579
1	-0.00268171
1	0.0026851
1	-0.00268869
1	0.00268982
1	0.00269428
1	0.00269746
1	0.002698
1	0.00270415
1	-0.00270594
1	0.00271013
1	-0.0027153
1	0.00272092
1	0.00272201
1	0.00272682
1	0.0027311
1	-0.00273805
1	-0.00273807
1	0.00274804
1	0.0027507
1	0.00275083
1	-0.00275232
1	-0.00275386
1	-0.00275557
1	0.00275883
1	-0.00276062
1	-0.00276097
1	-0.0027655
1	0.00276988
1	-0.00277127
1	0.0027733
1	0.00277726
1	-0.00278121
1	-0.00279037
1	0.00279201
1	-0.0027964
1	-0.0027964
1	0.00279898
1	0.00280019
1	-0.00280144
1	-0.00280252
1	0.00280266
1	-0.00280381
1	-0.0028048
1	0.00280798
1	-0.00281081
1	0.00281166
1	-0.00281174
1	0.00281413
1	0.00281765
1	0.00282001
1	0.00282236
1	-0.00282358
1	0.00282605
1	0.00282713
1	0.00282862
1	-0.00282914
1	-0.00283016
1	-0.00283113
1	0.00284043
1	-0.0028562
1	-0.00285845
1	0.00285994
1	0.00286136
1	-0.0028649
1	-0.0028653
1	-0.00286606
1	-0.00287229
1	-0.00287923
1	-0.00288497
1	0.0028856
1	0.00288919
1	-0.00289591
1	-0.00289759
1	-0.00289913
1	0.00290601
1	0.00290815
1	0.00290871
1	-0.00291496
1	-0.00291622
1	-0.00291987
1	-0.00292167
1	0.00292331
1	0.00292334
1	0.00292417
1	-0.00292469
1	0.00292632
1	-0.00293099
1	0.00293693
1	-0.00293727
1	0.00293809
1	-0.00294344
1	0.00294478
1	0.00294502
1	-0.00294696
1	-0.00295577
1	0.00295647
1	0.00295704
1	0.002958
1	-0.00296132
1	-0.00296772
1	0.00296885
1	-0.00296943
1	-0.00297212
1	0.00297838
1	0.00297967
1	0.00297994
1	-0.00298041
1	0.00298159
1	0.00298576
1	0.00298804
1	-0.00298905
1	0.002994
1	0.00299435
1	0.00299664
1	-0.00299917
1	0.00300794
1	-0.00301028
1	-0.00301257
1	0.00302471
1	0.003028
1	-0.00303702
1	-0.00303812
1	0.00304258
1	0.00304551
1	-0.00304826
1	-0.00305177
1	-0.00305731
1	-0.00305845
1	-0.0030651
1	0.00306594
1	-0.00307291
1	0.00307836
1	-0.00307893
1	0.00307989
1	-0.00308158
1	-0.00308876
1	0.0030945
1	-0.00309693
1	-0.00309797
1	-0.00309904
1	0.00310048
1	-0.00310515
1	0.00310618
1	0.00310966
1	-0.00311026
1	0.00311463
1	-0.00311619
1	-0.00311711
1	-0.00312133
1	0.0031222
1	0.00312504
1	0.00312719
1	0.00313398
1	-0.00313449
1	0.00313671
1	-0.00314288
1	-0.00314328
1	0.0031435
1	0.00314374
1	-0.00314424
1	-0.00314807
1	0.00315434
1	0.00315463
1	-0.00315517
1	0.00315914
1	0.00316068
1	-0.00316101
1	-0.00316293
1	0.00316322
1	-0.00316423
1	-0.00316715
1	0.00316864
1	0.00318489
1	-0.00318503
1	0.00318649
1	0.00318651
1	0.00319341
1	-0.00319628
1	0.00319883
1	-0.00319921
1	-0.00322345
1	0.00322457
1	0.0032271
1	-0.00323634
1	-0.00324029
1	-0.00324068
1	-0.00324073
1	0.00324112
1	-0.00324703
1	-0.00325554
1	-0.00325636
1	0.0032568
1	0.00325828
1	0.003263
1	-0.00326879
1	0.00326903
1	0.00327056
1	0.00327197
1	0.00327197
1	0.00327197
1	-0.00327316
1	0.00327612
1	0.00327703
1	-0.00327861
1	0.00328067
1	0.00328168
1	-0.00328841
1	-0.00329237
1	-0.00330357
1	-0.00330571
1	0.00330601
1	0.00330717
1	-0.00330777
1	-0.00331691
1	0.00332412
1	-0.00332522
1	0.00332673
1	0.00332694
1	-0.0033428
1	-0.00334419
1	-0.00335171
1	-0.00335341
1	-0.0033545
1	0.0033552
1	0.00335966
1	-0.00336081
1	0.00336356
1	0.00336935
1	0.00337067
1	0.00337546
1	0.00337655
1	-0.00337752
1	-0.00337821
1	-0.00338075
1	0.00338357
1	-0.00338365
1	0.00338546
1	-0.00338878
1	0.0033894
1	0.00339012
1	-0.00339299
1	0.00339792
1	-0.00340224
1	0.00340251
1	0.00340596
1	-0.00340768
1	-0.00341408
1	-0.00341795
1	-0.00341921
1	-0.00342038
1	0.00342372
1	0.00343372
1	0.00343514
1	-0.00344153
1	0.00344357
1	-0.00344468
1	0.00344517
1	0.00344657
1	0.00344695
1	0.00344755
1	-0.00344792
1	0.00345469
1	-0.00345564
1	-0.00345761
1	-0.00346116
1	0.00346207
1	-0.00346344
1	-0.00346399
1	-0.00346824
1	-0.00347297
1	0.00347298
1	0.00347458
1	0.00348204
1	0.00348261
1	-0.00348781
1	-0.00348892
1	-0.00349433
1	-0.00350493
1	-0.00350542
1	0.00350711
1	-0.00350864
1	-0.00350898
1	0.00351186
1	-0.00351432
1	-0.00351436
1	0.00351786
1	-0.00352255
1	0.00352418
1	-0.00352439
1	0.00352623
1	0.00352924
1	0.00353023
1	-0.00354015
1	-0.00354015
1	0.00354771
1	-0.00355489
1	0.00355628
1	0.00355681
1	-0.00356065
1	-0.00356489
1	-0.00356494
1	-0.00356739
1	-0.00356822
1	0.00356882
1	-0.00357308
1	-0.00357639
1	-0.00358066
1	0.00358162
1	0.00358232
1	-0.00358338
1	-0.00359278
1	0.00359598
1	0.00359923
1	0.00360061
1	-0.00360372
1	0.00360402
1	-0.00360814
1	0.00361132
1	0.00361505
1	-0.00361653
1	0.00361962
1	-0.00362109
1	0.00362416
1	0.00362573
1	0.00362682
1	-0.00363338
1	-0.00363913
1	0.00363939
1	0.00364064
1	0.00364703
1	0.0036528
1	0.00365503
1	0.00365575
1	0.00365665
1	0.00366274
1	-0.0036634
1	-0.00366638
1	0.00366985
1	-0.00367534
1	-0.00367594
1	-0.00367594
1	0.00367815
1	-0.00368202
1	0.00368536
1	0.0036931
1	0.00369833
1	-0.00369941
1	-0.00370453
1	0.00370774
1	0.00370921
1	0.00371027
1	0.00371115
1	0.00371316
1	0.00371481
1	0.00371769
1	-0.00372181
1	0.00372238
1	-0.00372244
1	-0.00372557
1	-0.00372903
1	-0.00372908
1	0.00373292
1	-0.00373347
1	-0.00374063
1	0.00374251
1	-0.00374606
1	-0.00374618
1	0.00375536
1	0.0037583
1	-0.00376217
1	-0.00376895
1	0.00377288
1	0.00377837
1	-0.00377879
1	-0.00378236
1	-0.00378397
1	-0.0037853
1	0.0037889
1	-0.00379448
1	0.0037957
1	-0.00379976
1	0.00380166
1	0.00380448
1	0.00380999
1	-0.0038134
1	-0.00381584
1	0.0038166
1	-0.00381817
1	-0.00382156
1	0.00382435
1	0.00383607
1	0.0038383
1	-0.00384664
1	-0.00384767
1	-0.00384908
1	0.00385079
1	0.00385959
1	-0.00386124
1	0.0038684
1	-0.00387278
1	-0.0038769
1	-0.00388405
1	0.00389178
1	-0.00390509
1	0.0039059
1	-0.00390665
1	0.00390675
1	0.00391186
1	-0.00391628
1	-0.00391843
1	0.0039241
1	0.00392632
1	0.00392803
1	0.00392936
1	0.00392986
1	-0.00393507
1	-0.00394649
1	0.00394791
1	-0.00395056
1	0.00395279
1	-0.00395801
1	-0.00396389
1	0.00397301
1	-0.00398007
1	-0.00398335
1	0.00398807
1	0.00399291
1	0.00399377
1	-0.00399421
1	0.00400067
1	0.00401443
1	0.00401832
1	-0.00402044
1	-0.00403738
1	-0.00403929
1	0.00404361
1	-0.00404755
1	0.00404786
1	0.0040495
1	-0.00405105
1	0.00405703
1	0.00405793
1	0.00405955
1	-0.00407353
1	-0.00407439
1	0.00407471
1	0.00407754
1	0.00407958
1	0.0040805
1	-0.00408137
1	-0.00408757
1	-0.00408858
1	-0.00409191
1	0.00409289
1	0.00409303
1	0.00410033
1	-0.00410582
1	-0.00410932
1	0.00410948
1	-0.00411348
1	-0.00411778
1	0.00412241
1	-0.00412462
1	-0.00412618
1	-0.00412648
1	0.00412983
1	-0.00413151
1	-0.00413158
1	-0.00413569
1	0.00413644
1	0.00413757
1	-0.00413914
1	0.00414151
1	-0.00414347
1	0.00414366
1	0.00415325
1	0.0041577
1	0.00415893
1	-0.0041609
1	-0.0041641
1	-0.00416416
1	0.00416459
1	0.00417002
1	0.00417145
1	0.00417464
1	0.00418164
1	0.00419171
1	-0.0041953
1	-0.00420567
1	0.00420678
1	-0.00420901
1	0.00421426
1	0.00421433
1	-0.004217
1	0.00421784
1	0.00421868
1	0.00422067
1	0.00422176
1	-0.00422285
1	-0.00422684
1	-0.00422955
1	0.00423397
1	-0.00423651
1	0.00423868
1	-0.00424187
1	-0.00424197
1	-0.00424512
1	0.00424531
1	0.00424577
1	-0.0042464
1	0.00424971
1	-0.00425252
1	0.00425377
1	0.00425822
1	0.00426119
1	0.0042634
1	0.00426381
1	-0.00426502
1	0.00426975
1	-0.00427297
1	-0.00427673
1	-0.00428104
1	0.00428241
1	-0.00429098
1	-0.00429099
1	0.00429434
1	0.00429868
1	-0.00430721
1	0.00430722
1	0.00430795
1	-0.00430796
1	-0.0043111
1	0.00431692
1	-0.00431956
1	0.00432368
1	-0.00432672
1	0.0043275
1	-0.0043289
1	-0.00433329
1	0.00433536
1	0.00433552
1	0.00433658
1	-0.00433885
1	0.00433941
1	-0.00434091
1	-0.00434109
1	0.00434803
1	0.0043527
1	0.00436006
1	-0.00436009
1	-0.00436025
1	0.0043623
1	0.00436273
1	0.00437103
1	0.00437157
1	-0.0043764
1	0.00437655
1	0.00438747
1	0.0043896
1	-0.00439156
1	-0.00439217
1	0.0043976
1	0.00440863
1	-0.00441228
1	-0.00441476
1	-0.00441747
1	0.00442232
1	-0.00442263
1	0.00443857
1	-0.00444333
1	-0.00444358
1	0.00445013
1	-0.00445151
1	-0.00445309
1	-0.00445467
1	-0.0044569
1	0.00446527
1	-0.00446539
1	-0.00446573
1	-0.00446658
1	-0.00446668
1	-0.00446984
1	0.00447031
1	0.00447111
1	0.00447513
1	0.00447629
1	0.00447964
1	0.00447978
1	0.0044812
1	0.00448837
1	-0.00449319
1	-0.00450049
1	0.00450055
1	-0.00450097
1	-0.00450462
1	0.00450701
1	0.00451426
1	-0.00451449
1	0.00451792
1	0.00452424
1	0.00452989
1	-0.00453986
1	0.00454083
1	0.00454758
1	-0.00454848
1	0.00455043
1	-0.00455248
1	0.00455877
1	-0.00455986
1	-0.00456071
1	-0.00456116
1	0.00456275
1	0.00456807
1	0.00457066
1	-0.00457169
1	0.00457173
1	0.00457764
1	-0.00458418
1	0.00458794
1	0.00460182
1	0.00460731
1	-0.00460798
1	0.00460966
1	0.00461042
1	0.0046116
1	0.00461171
1	-0.00461495
1	-0.00461536
1	0.00461972
1	-0.00461991
1	0.00462384
1	0.00462461
1	0.00462749
1	-0.00462966
1	0.00463158
1	0.00463848
1	-0.00464665
1	0.00464777
1	0.00465098
1	-0.00465289
1	-0.00465801
1	0.00466118
1	0.00466926
1	-0.00467009
1	-0.00467392
1	0.00467599
1	0.00467879
1	-0.00467884
1	0.00468504
1	0.00469337
1	-0.00469776
1	0.00470346
1	0.00470611
1	0.00470662
1	-0.0047074
1	-0.00471225
1	-0.00471689
1	0.00471875
1	0.00472395
1	-0.00472675
1	-0.00474339
1	-0.00474637
1	0.00474879
1	-0.00474927
1	0.00475153
1	0.00475244
1	0.00475384
1	0.00475416
1	0.00475482
1	-0.0047549
1	-0.00476017
1	-0.00476362
1	-0.00476785
1	-0.00476832
1	0.00476885
1	0.00477077
1	0.00477442
1	0.0047823
1	-0.00478832
1	0.00479179
1	0.00479361
1	0.00479509
1	-0.00479695
1	-0.00480643
1	0.00481141
1	0.00481326
1	-0.00481405
1	0.00483612
1	0.00483617
1	0.00483756
1	0.00484363
1	-0.00484373
1	0.00484814
1	0.00484958
1	-0.00484968
1	-0.00485351
1	-0.00485355
1	-0.00485836
1	0.00485985
1	-0.00486002
1	-0.00486875
1	-0.00486955
1	-0.00487748
1	0.00487932
1	-0.00488313
1	-0.00488336
1	-0.00488386
1	-0.00488891
1	-0.00489737
1	-0.00489943
1	-0.00490479
1	0.00490554
1	0.00490575
1	-0.00490716
1	-0.00490896
1	0.00490929
1	-0.00491161
1	-0.0049142
1	-0.00491493
1	0.00491757
1	-0.00492434
1	0.00492492
1	-0.00493646
1	-0.00494152
1	0.004942
1	-0.00494294
1	-0.00494693
1	0.00494713
1	0.00494956
1	-0.00496044
1	0.00496389
1	0.00497216
1	0.0049728
1	-0.0049737
1	-0.00497816
1	-0.00497901
1	0.00497943
1	0.00498138
1	0.00498225
1	-0.00498464
1	-0.00498797
1	-0.00498855
1	-0.00499125
1	-0.00499227
1	0.00500475
1	0.0050059
1	-0.00500717
1	0.0050115
1	0.00501168
1	0.00501511
1	0.00501661
1	0.00502224
1	0.00502754
1	-0.00502804
1	0.00504641
1	-0.00504666
1	-0.00504736
1	-0.00505198
1	-0.00505277
1	-0.00506072
1	0.00507562
1	-0.0050786
1	0.00508169
1	0.00508378
1	0.00508704
1	-0.00508957
1	0.00509146
1	0.00509267
1	-0.00509285
1	0.00510157
1	-0.00511236
1	0.00511267
1	0.00511605
1	0.00512432
1	0.00512697
1	-0.00512792
1	0.00513187
1	-0.00514147
1	-0.00515309
1	-0.00516239
1	0.00517116
1	-0.00517261
1	-0.00517533
1	-0.00517682
1	0.0051777
1	-0.00518362
1	-0.00518753
1	0.00519176
1	-0.0051979
1	0.00520018
1	-0.00520318
1	-0.0052037
1	-0.00520423
1	0.00520771
1	-0.00521258
1	0.00521296
1	-0.0052162
1	-0.0052165
1	-0.00521923
1	0.005221
1	0.00522505
1	0.00522872
1	0.00523501
1	-0.00524196
1	0.00524344
1	-0.00524561
1	-0.00525159
1	0.00525374
1	-0.00525509
1	0.00525888
1	-0.00525994
1	0.00526283
1	0.00526322
1	0.00526331
1	0.0052634
1	-0.00526908
1	0.00527271
1	-0.00527388
1	-0.00527983
1	-0.00527999
1	-0.00528096
1	-0.00528295
1	0.00528499
1	0.00528857
1	0.0052925
1	-0.00529363
1	-0.00530094
1	0.00530422
1	-0.00530649
1	0.00530665
1	0.00530796
1	-0.00530937
1	0.00531008
1	0.00531153
1	0.00531173
1	0.00531257
1	-0.00531319
1	-0.00531424
1	0.00531697
1	0.00531992
1	-0.00532214
1	-0.00532504
1	-0.00532992
1	0.00532995
1	-0.00533268
1	0.00533277
1	0.00533389
1	0.00533407
1	0.00533627
1	0.00533631
1	-0.00533761
1	-0.00533784
1	0.00533813
1	-0.00533875
1	0.00533876
1	-0.00535174
1	-0.00536041
1	0.00536111
1	0.00536207
1	0.00537796
1	0.00537873
1	-0.00537925
1	0.00538231
1	-0.00538363
1	-0.00538372
1	-0.00538883
1	0.00539131
1	-0.00539144
1	-0.00539188
1	-0.00540078
1	0.00540727
1	0.00541716
1	-0.00541846
1	-0.00542342
1	-0.0054241
1	-0.00542524
1	-0.00542583
1	0.00543077
1	-0.00543629
1	-0.00543686
1	-0.00543866
1	-0.00544032
1	0.00545689
1	-0.00545745
1	0.00545778
1	0.00546451
1	-0.00546823
1	0.00547412
1	0.00547644
1	0.00547898
1	0.00548322
1	0.00548541
1	0.00548661
1	-0.00548964
1	-0.00549155
1	0.00549981
1	0.00550746
1	-0.00551471
1	0.00551573
1	-0.00551579
1	-0.00551718
1	-0.00551752
1	0.00551918
1	-0.00551965
1	0.0055215
1	-0.00552193
1	0.00552202
1	0.00552361
1	0.00553048
1	0.00553179
1	-0.00553913
1	-0.00553989
1	-0.00554126
1	-0.00554714
1	0.00554744
1	0.00554982
1	-0.00555261
1	-0.00555519
1	-0.00555638
1	-0.00556091
1	0.005562
1	0.0055684
1	0.00556903
1	-0.00557029
1	0.00557663
1	-0.00557669
1	0.00559151
1	0.00559262
1	-0.00559775
1	-0.00559822
1	0.00560053
1	-0.00560474
1	-0.00560736
1	-0.00560863
1	-0.00560905
1	0.00561578
1	-0.00562155
1	-0.0056244
1	-0.00562764
1	-0.00562944
1	-0.00563323
1	0.00563537
1	-0.00563544
1	0.00563758
1	0.00563962
1	0.00564145
1	-0.0056442
1	0.00564522
1	0.00564604
1	0.00564612
1	-0.00564838
1	0.00564948
1	0.00565138
1	0.00565166
1	0.00565198
1	-0.00565213
1	-0.00565462
1	-0.0056603
1	-0.00566251
1	-0.00566338
1	0.00566393
1	-0.00566498
1	0.0056664
1	0.00567078
1	-0.00567144
1	-0.00567298
1	0.00567804
1	-0.00567874
1	0.00569332
1	-0.00569608
1	-0.0056962
1	-0.00569984
1	0.00570019
1	0.00570105
1	0.00571175
1	0.00571809
1	-0.00572159
1	-0.00572384
1	-0.00572542
1	-0.00572616
1	-0.00573199
1	0.00574089
1	-0.00574617
1	0.00575132
1	0.00575776
1	-0.00576125
1	-0.00576159
1	0.00576448
1	0.0057645
1	-0.00576473
1	-0.00576719
1	0.00576922
1	0.00577598
1	0.00578286
1	0.00578393
1	-0.00578483
1	0.00578546
1	-0.0057861
1	-0.00579299
1	-0.00579432
1	0.00579447
1	0.00579701
1	-0.00580299
1	0.00580396
1	0.00580747
1	0.0058095
1	0.00581137
1	-0.00581402
1	-0.00581465
1	0.00581558
1	-0.00581863
1	0.00581909
1	-0.00582311
1	0.00582328
1	-0.00582526
1	-0.00582694
1	-0.00582828
1	-0.00582866
1	-0.00582924
1	0.00583277
1	-0.00583923
1	-0.00584155
1	-0.00584196
1	-0.00584457
1	0.00584499
1	-0.005848
1	0.00585031
1	-0.00585583
1	-0.00585612
1	0.00585793
1	-0.00586291
1	0.00586612
1	-0.00586624
1	-0.00586765
1	0.00586869
1	0.00587636
1	0.00587932
1	0.00588103
1	0.0058852
1	-0.00589563
1	-0.00589834
1	-0.00590303
1	-0.00590369
1	-0.00590659
1	0.00590682
1	-0.00590818
1	0.00590887
1	0.00590972
1	0.00591481
1	-0.00591913
1	-0.00592745
1	-0.00592934
1	-0.00593259
1	0.00593509
1	-0.00593787
1	-0.00593901
1	0.00593983
1	-0.00595107
1	-0.00595115
1	-0.00595528
1	-0.00596176
1	0.00596841
1	-0.00596945
1	0.00597203
1	0.00597287
1	0.00598322
1	0.00598385
1	-0.00598756
1	0.00598763
1	-0.00598764
1	0.00598767
1	0.00598937
1	-0.00599278
1	-0.00599519
1	-0.00600078
1	-0.00600357
1	0.00601882
1	-0.00602351
1	0.00602578
1	-0.0060258
1	0.00602612
1	-0.0060293
1	-0.00603195
1	-0.00603232
1	-0.00603488
1	0.00603801
1	0.00603885
1	0.006043
1	0.00604704
1	-0.00605025
1	0.00605106
1	0.00605737
1	-0.00606218
1	-0.00606244
1	-0.00606395
1	0.00606578
1	-0.00607207
1	0.00607639
1	0.00608004
1	-0.00609379
1	0.00609419
1	-0.0060978
1	0.00610012
1	-0.00611324
1	0.00611433
1	0.00611655
1	0.00611702
1	0.00611947
1	0.00612204
1	0.00612644
1	-0.00612971
1	-0.00613064
1	-0.00613536
1	0.00614209
1	0.00614648
1	-0.00615243
1	0.00615449
1	0.00615704
1	-0.00615719
1	0.00616
1	-0.00616209
1	-0.00616361
1	0.00616831
1	-0.00616949
1	0.00617584
1	0.00617803
1	0.00617908
1	0.0061804
1	0.00618757
1	-0.00619195
1	0.00619574
1	0.00619798
1	-0.00619925
1	0.0062022
1	-0.00620259
1	-0.00620349
1	0.00620494
1	0.00620678
1	0.00620964
1	-0.00621593
1	0.00621721
1	0.00621762
1	0.00621836
1	0.00622048
1	-0.00622313
1	-0.00622961
1	0.0062298
1	0.00623212
1	-0.00623219
1	-0.00623733
1	-0.00623888
1	-0.00624135
1	-0.00625057
1	-0.00625173
1	0.0062538
1	0.00626574
1	-0.00626591
1	0.00626761
1	-0.00626891
1	0.0062797
1	-0.00627974
1	0.00629164
1	-0.00629239
1	-0.00629614
1	-0.00629704
1	-0.00629973
1	-0.00630372
1	0.00630621
1	0.00631174
1	0.0063123
1	-0.00631261
1	0.00631609
1	-0.00631739
1	0.00632514
1	0.00632584
1	-0.00632869
1	0.00633142
1	0.00633303
1	0.00633438
1	0.00633884
1	-0.00634152
1	0.00634264
1	-0.00634732
1	-0.00634821
1	0.00634908
1	0.00634918
1	-0.00634996
1	0.00635158
1	0.00635221
1	0.00635559
1	0.00635571
1	-0.00635614
1	0.00635842
1	0.00635961
1	0.00636007
1	-0.00636823
1	0.00637045
1	0.00637049
1	-0.00637072
1	0.00637087
1	-0.00637183
1	0.006372
1	-0.00638348
1	-0.00638351
1	-0.00638815
1	0.00638837
1	0.00639028
1	0.00639276
1	-0.00639438
1	0.00639639
1	0.00639736
1	-0.0063989
1	0.00640016
1	-0.00640181
1	0.00640433
1	0.00640497
1	0.00640623
1	-0.00640682
1	0.00640787
1	0.00641452
1	0.00641493
1	-0.00641708
1	0.00641958
1	-0.00642048
1	-0.00642269
1	-0.00642661
[truncated: 577,573+ more rows]

## Sheet: K562
Replication timing group	log2 uracil enrichment
1	0.000106647
1	0.000112341
1	0.000114138
1	-0.000120485
1	0.000120592
1	0.000123571
1	0.0001445
1	0.000146831
1	-0.000156109
1	-0.00016082
1	0.000175156
1	-0.000180623
1	0.000185702
1	0.00019032
1	0.000190828
1	-0.000192298
1	-0.000194717
1	-0.000198575
1	-0.000202362
1	-0.000223205
1	-0.000230498
1	0.000251138
1	0.000257539
1	0.000262662
1	0.000265571
1	-0.000269959
1	-0.00028011
1	0.000286599
1	0.000318845
1	-0.000320505
1	-0.000320828
1	0.00032226
1	0.000322477
1	-0.000325371
1	-0.000334228
1	0.00034372
1	-0.000344346
1	0.000380992
1	0.000392455
1	-0.000395375
1	0.000396586
1	-0.000406619
1	0.000408557
1	-0.000418229
1	-0.0004291
1	-0.000438971
1	-0.000454483
1	0.00045573
1	0.000455985
1	-0.000470932
1	0.000481229
1	0.000485849
1	0.000492842
1	-0.000500226
1	0.000501625
1	-0.00050985
1	-0.00052758
1	0.000529839
1	0.000547915
1	-0.000563066
1	-0.000572432
1	-0.000574468
1	-0.000574707
1	-0.000580285
1	-0.000598879
1	0.000605327
1	0.000616406
1	0.000626873
1	0.000627286
1	-0.000631752
1	0.000636118
1	0.000642126
1	-0.000649634
1	0.000653662
1	-0.000657224
1	0.00065843
1	-0.00065995
1	0.000666249
1	0.000672289
1	-0.000677657
1	-0.000680768
1	-0.000691651
1	-0.000701027
1	0.0007071
1	0.000711469
1	0.000715124
1	0.000729902
1	-0.000732885
1	0.000735713
1	0.000740039
1	0.000743591
1	0.000744549
1	-0.000744809
1	-0.000749896
1	0.000752123
1	0.000756716
1	-0.000764467
1	-0.000769043
1	-0.000773258
1	-0.00077381
1	0.000776638
1	-0.000777646
1	0.000779536
1	-0.00079404
1	0.000794611
1	0.000795126
1	-0.000795277
1	-0.000811421
1	0.000814161
1	0.000814182
1	-0.000816094
1	0.000817858
1	-0.000819104
1	-0.000825983
1	-0.000830962
1	-0.000839125
1	0.00084454
1	-0.000846874
1	0.000852724
1	0.000854431
1	0.000857384
1	-0.000868638
1	-0.000922808
1	0.000927634
1	-0.000935879
1	0.000950268
1	-0.000957971
1	0.000958063
1	0.000963373
1	-0.000976324
1	-0.000977544
1	-0.000986906
1	-0.000992992
1	-0.00100938
1	-0.00101381
1	0.00101995
1	-0.00102643
1	0.00105215
1	-0.00106627
1	-0.00106742
1	-0.00107922
1	0.00108198
1	0.00108593
1	0.00108713
1	-0.00108779
1	-0.00109395
1	0.00109804
1	-0.00110585
1	-0.00110869
1	-0.00110927
1	-0.0011109
1	-0.00111132
1	-0.00111907
1	0.00112827
1	0.00112951
1	-0.00113325
1	0.00113334
1	0.00114737
1	-0.00115917
1	0.00116606
1	0.00117683
1	0.00117919
1	0.00118843
1	-0.00118994
1	-0.00119212
1	0.00120066
1	-0.00120245
1	-0.00120411
1	-0.00122958
1	0.00124089
1	0.00126678
1	-0.00126737
1	0.00127112
1	0.00127191
1	0.00127749
1	0.00130575
1	-0.00131369
1	-0.00131589
1	0.00131606
1	0.00131606
1	-0.00132683
1	0.00132935
1	0.00133184
1	0.00133885
1	0.00134636
1	-0.00135735
1	0.00136073
1	-0.00137122
1	-0.0013853
1	-0.00139229
1	0.00140041
1	-0.00140317
1	-0.00140555
1	0.00141612
1	0.00142446
1	0.00143208
1	0.0014503
1	-0.00145276
1	-0.0014615
1	0.00146627
1	0.00147752
1	0.00148455
1	0.00149287
1	-0.00150256
1	-0.00151764
1	-0.00152528
1	-0.00153422
1	0.00154666
1	-0.00155851
1	-0.00156393
1	-0.00156571
1	-0.00157629
1	-0.00157723
1	0.0016069
1	0.00160882
1	-0.00161344
1	0.00161531
1	-0.00161679
1	0.00162369
1	0.001631
1	-0.00163168
1	0.00163218
1	-0.00163621
1	0.00165492
1	0.00166316
1	-0.00166979
1	-0.00167374
1	0.00168592
1	-0.00168792
1	-0.00171057
1	0.00172421
1	0.00173811
1	0.00174122
1	-0.00174496
1	-0.00174719
1	-0.00176145
1	-0.00179301
1	0.00181383
1	-0.00181469
1	0.00182239
1	-0.00185181
1	0.00185643
1	-0.00186155
1	0.00186254
1	-0.00187602
1	0.00187642
1	-0.0018808
1	0.00189107
1	0.00189249
1	-0.00189308
1	0.00189502
1	-0.00189509
1	0.00190898
1	0.00190932
1	0.00191547
1	0.00191986
1	0.00192471
1	-0.00192853
1	0.00193073
1	0.00193263
1	-0.00193267
1	-0.00196675
1	0.00197817
1	-0.00197985
1	0.0019886
1	0.00199175
1	0.00199486
1	-0.00199639
1	0.00199839
1	-0.00200347
1	-0.002014
1	-0.00201422
1	0.00202079
1	-0.00202544
1	0.00203051
1	0.00205424
1	-0.00205776
1	0.0020581
1	0.00206167
1	-0.00206546
1	0.00207034
1	-0.00207149
1	-0.00207495
1	0.00207647
1	0.00209132
1	0.00209153
1	0.00210032
1	-0.00210805
1	-0.00210967
1	-0.00211255
1	-0.00211382
1	0.00211539
1	-0.00211592
1	0.00212122
1	-0.00213869
1	-0.00213993
1	-0.00214317
1	0.00215247
1	0.00215285
1	-0.00215636
1	-0.00217087
1	-0.00218566
1	-0.00219671
1	0.00220646
1	-0.00222288
1	0.00223808
1	-0.00224038
1	-0.00225079
1	0.00226859
1	-0.00226926
1	0.00227534
1	0.00229225
1	0.0023055
1	-0.0023111
1	-0.00231636
1	0.00231683
1	0.00232056
1	0.00232223
1	0.00232736
1	-0.00232933
1	-0.00233249
1	-0.00233532
1	0.00235025
1	0.00235065
1	-0.00236034
1	-0.00236745
1	0.00237939
1	0.00239387
1	-0.00239871
1	0.00240141
1	-0.00240225
1	0.00241214
1	0.00242636
1	0.00243003
1	-0.00243178
1	-0.00243359
1	0.00243417
1	-0.0024563
1	0.00245828
1	-0.00247456
1	0.00247625
1	-0.00250154
1	0.00251116
1	-0.00252268
1	0.00252538
1	0.00254062
1	-0.00255288
1	0.00255991
1	-0.00256488
1	-0.00257218
1	0.00257345
1	-0.00257783
1	0.00257821
1	-0.00258739
1	0.00260125
1	-0.00260229
1	0.0026051
1	-0.00261128
1	-0.00261747
1	0.00261781
1	-0.00262475
1	0.00263076
1	0.00263305
1	-0.00264386
1	0.00264514
1	-0.0026484
1	-0.00265885
1	0.0026721
1	0.00269083
1	0.00270507
1	0.00270636
1	-0.00271522
1	-0.00272026
1	0.00272876
1	0.00273071
1	0.00273386
1	-0.00273505
1	0.00274397
1	-0.00275982
1	-0.00277222
1	-0.00278611
1	0.00279967
1	-0.00280404
1	-0.0028268
1	0.00284446
1	0.00284528
1	0.00284629
1	0.00285242
1	0.00285287
1	0.00285879
1	0.00286439
1	0.00287001
1	-0.00287132
1	0.00287963
1	-0.00289098
1	-0.0028917
1	0.00292541
1	-0.00293272
1	-0.00293661
1	-0.00294761
1	0.00295158
1	0.00295852
1	-0.00295928
1	-0.00296703
1	0.00298728
1	-0.00299907
1	-0.00300864
1	0.00301105
1	-0.00302095
1	0.00302351
1	0.00302484
1	-0.00302907
1	0.00303175
1	-0.00303235
1	0.00303329
1	0.003051
1	0.00306475
1	-0.00307071
1	0.00307445
1	0.00308181
1	-0.00308912
1	-0.00309281
1	-0.00309662
1	-0.003108
1	-0.00311416
1	0.00311824
1	0.00312269
1	0.00312745
1	-0.0031338
1	-0.00313595
1	-0.00313651
1	-0.00313842
1	-0.0031388
1	-0.00314339
1	-0.00314906
1	-0.00315967
1	-0.00316537
1	-0.00316562
1	-0.00318984
1	0.00320008
1	0.00320472
1	-0.0032159
1	0.00321832
1	-0.00322069
1	0.00322154
1	-0.00323544
1	0.00324121
1	-0.0032433
1	-0.00325624
1	-0.00326212
1	-0.00326761
1	0.00327618
1	0.00328357
1	0.00329162
1	0.00329319
1	0.00329441
1	-0.00330536
1	0.00333074
1	-0.00333248
1	0.00334168
1	0.00334459
1	-0.00335984
1	0.00336479
1	-0.00336718
1	-0.00337968
1	-0.00338608
1	0.00340132
1	0.0034178
1	-0.00342423
1	-0.00342583
1	0.00342614
1	0.00343167
1	-0.00343793
1	-0.00345881
1	0.00347355
1	-0.00347975
1	0.00348833
1	0.00349729
1	0.00350634
1	-0.00351671
1	-0.00351875
1	-0.0035202
1	-0.00352462
1	-0.00352922
1	-0.00353907
1	-0.00354641
1	0.00356212
1	0.00356613
1	-0.00357097
1	-0.00358265
1	0.00358712
1	0.00360488
1	0.00361353
1	-0.00361514
1	0.00362511
1	0.00363191
1	0.0036383
1	0.00363989
1	-0.00364334
1	0.00364365
1	-0.00365177
1	0.00366861
1	-0.00367213
1	-0.00367332
1	-0.00367671
1	-0.0036961
1	0.00372638
1	0.00375102
1	-0.00375297
1	0.00376282
1	0.00376593
1	-0.00376654
1	0.00376744
1	0.00376847
1	-0.00377153
1	0.00378479
1	-0.0037919
1	-0.00379535
1	-0.00379954
1	0.00381101
1	0.00381245
1	-0.0038204
1	0.00382476
1	-0.00383131
1	0.00383852
1	-0.0038438
1	0.003851
1	-0.0038543
1	0.00386676
1	-0.00388521
1	-0.00391294
1	0.00392467
1	0.00393503
1	-0.00393763
1	0.00394488
1	-0.00396317
1	-0.00396868
1	0.00396968
1	-0.00397416
1	-0.00397789
1	0.00397792
1	-0.00398145
1	-0.00398646
1	-0.00398714
1	-0.00399733
1	-0.00400407
1	0.00404732
1	0.00405277
1	0.00407264
1	-0.00407727
1	-0.00407829
1	0.0040952
1	0.00409908
1	-0.00410267
1	0.00410453
1	-0.00410977
1	0.0041099
1	-0.00413292
1	-0.00413349
1	0.00413362
1	-0.00414056
1	-0.00414492
1	-0.00416568
1	-0.00418175
1	0.00418213
1	-0.00419569
1	-0.00420192
1	0.00421467
1	0.00422986
1	0.0042339
1	-0.0042513
1	0.00425638
1	0.00425669
1	-0.00425912
1	0.00425991
1	-0.00427398
1	0.00427529
1	0.00428444
1	0.00429645
1	0.00430719
1	-0.00431023
1	0.00432029
1	0.00432578
1	0.00433566
1	0.00434795
1	0.00435166
1	0.00435839
1	-0.00436336
1	0.00436813
1	-0.00437163
1	0.00438022
1	-0.0043905
1	0.00440784
1	0.00441582
1	0.00445494
1	0.00446855
1	-0.00447421
1	0.00447448
1	-0.00447651
1	-0.00447858
1	-0.00449771
1	-0.0044982
1	0.00450102
1	-0.0045052
1	-0.00450971
1	-0.00451439
1	0.00451565
1	-0.00452201
1	-0.00452767
1	-0.0045306
1	0.00454303
1	0.00455609
1	0.00455664
1	0.00455722
1	0.00456317
1	0.00458781
1	0.00458985
1	0.00461116
1	0.0046124
1	0.0046192
1	-0.00462034
1	-0.00462346
1	0.00462706
1	-0.00463751
1	-0.00464014
1	0.00464398
1	0.00464475
1	0.00465514
1	0.0046655
1	-0.00467151
1	0.0046894
1	-0.00469702
1	0.00469882
1	0.00469916
1	0.00470122
1	0.00471367
1	0.00473388
1	0.00474152
1	0.00474194
1	-0.00474261
1	-0.00474452
1	-0.00474707
1	-0.00478346
1	0.00478385
1	-0.00478395
1	0.00481008
1	-0.00481808
1	0.0048191
1	0.00482349
1	-0.00483505
1	-0.00483967
1	-0.004843
1	0.00484912
1	-0.00485734
1	-0.00486871
1	-0.00487147
1	-0.00488353
1	0.00488768
1	-0.00489719
1	0.0049148
1	-0.00491684
1	0.00491902
1	0.00494261
1	-0.00495712
1	0.0049623
1	-0.00496394
1	0.00496894
1	-0.00498125
1	-0.00501046
1	0.00503602
1	-0.00503653
1	0.00504513
1	0.00504863
1	0.00505538
1	0.00505677
1	-0.0050634
1	0.00506353
1	0.00508807
1	-0.00508833
1	-0.00509792
1	-0.00510452
1	0.00511309
1	-0.00511917
1	-0.00514728
1	0.00515323
1	0.00515425
1	-0.0051637
1	0.00516558
1	0.00517413
1	0.00517525
1	-0.00519323
1	0.00520312
1	0.00521084
1	-0.00521866
1	0.00525123
1	0.00525308
1	0.00525347
1	-0.00525442
1	0.00525467
1	0.00525467
1	0.00525467
1	0.00525694
1	-0.0052716
1	0.00527399
1	-0.00528586
1	0.00528751
1	-0.00528977
1	0.00529538
1	0.00529923
1	0.0053061
1	-0.0053179
1	0.00531807
1	0.00532495
1	-0.00532529
1	-0.00532957
1	0.00533328
1	0.00533562
1	0.00534002
1	-0.00535148
1	0.00537944
1	-0.0053888
1	0.00540093
1	0.0054038
1	0.00541621
1	0.0054261
1	-0.00542669
1	-0.00542911
1	-0.00542919
1	-0.00543184
1	0.00544342
1	-0.00544472
1	-0.00544629
1	-0.00545144
1	-0.00545559
1	-0.00545681
1	0.00545741
1	0.00546273
1	0.00546627
1	0.00547258
1	0.0054856
1	0.0054966
1	-0.00551766
1	0.00552552
1	0.00552962
1	0.00553086
1	0.00553354
1	-0.00555021
1	-0.00555164
1	0.00555512
1	0.00556695
1	-0.00557507
1	-0.00557507
1	-0.00557507
1	-0.00557507
1	-0.00558041
1	0.00558066
1	-0.00558209
1	-0.00559302
1	0.00559932
1	0.00560081
1	-0.00563924
1	0.00566309
1	0.00566494
1	0.00567356
1	-0.00567667
1	-0.005684
1	-0.00572036
1	-0.00574037
1	-0.00576373
1	-0.00577452
1	-0.00577739
1	-0.00580686
1	-0.0058335
1	0.0058363
1	0.00583873
1	-0.00584971
1	-0.00586105
1	-0.00586608
1	0.0058736
1	-0.00588302
1	0.00588325
1	0.00589453
1	0.00591384
1	-0.00591392
1	-0.00592218
1	-0.00592432
1	0.00592826
1	-0.00593276
1	-0.00593703
1	0.00594832
1	0.00594858
1	-0.00595621
1	0.00595791
1	-0.00597992
1	-0.00598971
1	0.00599413
1	-0.00600382
1	-0.00600532
1	0.00601236
1	-0.00601639
1	0.00601665
1	-0.00601894
1	-0.00603795
1	0.00604038
1	-0.00604466
1	0.00604629
1	-0.006049
1	0.00604911
1	-0.00605363
1	-0.00606575
1	-0.00607099
1	0.00607108
1	-0.0060758
1	0.00608295
1	0.00609717
1	-0.0060995
1	-0.00610221
1	0.00610399
1	-0.00610545
1	-0.00612808
1	-0.00613276
1	0.0061427
1	0.00615259
1	0.006156
1	0.00616473
1	0.00619695
1	-0.00619762
1	-0.00620208
1	-0.00621798
1	-0.00621931
1	-0.00622592
1	0.00623
1	0.00624077
1	-0.00624735
1	-0.00625497
1	0.00626921
1	-0.00627083
1	-0.00628316
1	0.00629113
1	-0.00629303
1	0.00629535
1	-0.0063175
1	-0.00632141
1	0.00633657
1	0.00633697
1	0.00634207
1	-0.00635505
1	-0.00636571
1	-0.00636597
1	0.0063776
1	0.00638122
1	0.00638962
1	-0.00639356
1	-0.00639506
1	-0.0063964
1	0.00640177
1	-0.00640756
1	0.00641142
1	0.00641315
1	0.00641716
1	0.00643781
1	0.00644716
1	0.00645543
1	-0.00645968
1	-0.00646271
1	0.00646338
1	0.00646412
1	-0.00647291
1	-0.00650145
1	-0.00651333
1	-0.00651389
1	0.00652255
1	-0.00652557
1	0.00653422
1	0.00654123
1	0.00656436
1	0.00656436
1	0.00656436
1	0.00656837
1	0.00657688
1	-0.00658684
1	0.00660349
1	-0.0066043
1	-0.00662461
1	0.00663998
1	-0.0066417
1	-0.00664376
1	-0.00664421
1	-0.00665246
1	0.00665814
1	-0.00668185
1	0.00670565
1	0.00670871
1	0.00671799
1	-0.00673185
1	-0.00673337
1	-0.00673583
1	0.00674622
1	-0.00676459
1	-0.00676992
1	0.00678107
1	-0.0067817
1	-0.00678611
1	0.00679152
1	-0.00679616
1	0.00679777
1	-0.00680633
1	0.00680699
1	-0.00680768
1	0.00682534
1	0.00682682
1	0.00683375
1	-0.00683986
1	0.0068448
1	0.00685463
1	-0.00686519
1	0.00686611
1	0.00687129
1	0.00687469
1	0.00688247
1	0.00689328
1	-0.00689476
1	-0.00691302
1	-0.00692005
1	0.00692125
1	0.0069224
1	0.00692408
1	0.00692772
1	0.00693214
1	0.00694178
1	-0.00695002
1	0.00695709
1	-0.00695799
1	0.00696543
1	0.00697396
1	0.00698823
1	0.00698884
1	-0.0070008
1	-0.00700528
1	0.00700797
1	0.00703274
1	0.00704144
1	-0.00704724
1	-0.00706489
1	-0.00707062
1	0.00707346
1	-0.00707548
1	-0.00707975
1	0.00708939
1	0.0071027
1	0.0071168
1	-0.00713517
1	0.00714989
1	0.00716115
1	-0.00716119
1	-0.00716791
1	-0.00717928
1	0.00718702
1	-0.00718775
1	-0.0071937
1	-0.0071956
1	-0.00720045
1	0.00720218
1	0.00720968
1	-0.00722148
1	-0.00722953
1	0.00723355
1	-0.00723529
1	0.00723681
1	-0.00724693
1	-0.00726347
1	0.00726606
1	-0.00726647
1	0.00727118
1	-0.00728153
1	-0.00728985
1	-0.0072945
1	0.00729576
1	-0.00731818
1	-0.00732237
1	0.00732295
1	-0.007334
1	-0.00733985
1	-0.00734015
1	-0.00734171
1	-0.00734225
1	-0.00734495
1	0.00734843
1	0.00736714
1	0.00736724
1	0.00736919
1	0.0073862
1	0.00738675
1	-0.00738836
1	-0.00739996
1	-0.00740897
1	-0.00742387
1	-0.00742387
1	-0.00742387
1	-0.00742387
1	-0.00742601
1	-0.00742706
1	-0.00742706
1	0.00742766
1	-0.00743585
1	0.00743827
1	-0.00744861
1	-0.00744867
1	0.00744955
1	0.00745329
1	-0.00746446
1	-0.00747248
1	-0.00747823
1	-0.00748279
1	-0.00748304
1	0.00750099
1	-0.00750772
1	0.00752477
1	0.00752694
1	-0.0075344
1	-0.00753503
1	0.00754899
1	0.00756134
1	0.00756494
1	-0.00756778
1	0.00756778
1	-0.00757096
1	0.00757239
1	0.00757654
1	-0.00760147
1	-0.00760953
1	-0.00761262
1	0.00761763
1	0.00762172
1	0.00762717
1	-0.0076345
1	-0.00763781
1	0.00764223
1	0.00765748
1	-0.0076759
1	0.00767815
1	0.00768499
1	-0.00769797
1	0.00770339
1	0.00772535
1	-0.00773304
1	0.00773376
1	0.00775038
1	0.00775526
1	-0.00776336
1	-0.00776352
1	0.00778721
1	0.00778972
1	-0.0077928
1	0.00781135
1	-0.00782275
1	0.00782647
1	0.0078272
1	0.0078292
1	-0.00783687
1	-0.00784957
1	0.0078497
1	0.0078509
1	0.00785799
1	0.00785827
1	-0.007861
1	-0.00786608
1	-0.00787592
1	-0.00787945
1	-0.00788863
1	-0.0078944
1	-0.0078958
1	-0.00790389
1	0.00791693
1	0.00791824
1	0.00792215
1	0.00793145
1	0.00794404
1	0.00794911
1	-0.00796013
1	-0.00796537
1	0.00797134
1	0.00797248
1	-0.0079727
1	0.00799038
1	0.00802349
1	-0.0080237
1	0.00803061
1	0.00803254
1	-0.00804696
1	0.00805495
1	-0.0080705
1	0.00807389
1	0.00807763
1	-0.00808284
1	-0.00808865
1	-0.00810079
1	0.00810826
1	0.00811193
1	0.00811394
1	0.00813021
1	-0.00814984
1	-0.00815269
1	-0.00817245
1	0.0081734
1	0.00819352
1	0.00819482
1	-0.00820331
1	0.00822849
1	0.00823741
1	0.00824096
1	0.00824369
1	-0.00824547
1	-0.00824699
1	-0.00824887
1	0.00825961
1	-0.00828351
1	0.00828749
1	-0.0082988
1	-0.00830752
1	0.00831432
1	0.00831881
1	0.00832094
1	-0.00833965
1	0.0083486
1	-0.00838975
1	-0.00840314
1	-0.00840598
1	0.00841322
1	0.00841365
1	0.00843165
1	0.00843906
1	0.00844111
1	0.00844224
1	0.00844778
1	0.00845287
1	-0.0084634
1	-0.00847108
1	0.00847719
1	0.00847762
1	0.00849785
1	0.00851112
1	0.00851226
1	0.00852241
1	0.00852448
1	0.00853006
1	0.0085365
1	0.00853831
1	0.00854164
1	-0.00855273
1	-0.00856577
1	-0.00858582
1	-0.00858757
1	0.00858877
1	-0.00859345
1	-0.00859843
1	-0.00861232
1	0.00862352
1	-0.00862373
1	0.00862714
1	-0.00863127
1	0.008633
1	-0.00863839
1	0.00864256
1	0.00866604
1	0.00866736
1	0.00867622
1	-0.00868048
1	-0.00869243
1	-0.00869714
1	-0.00870203
1	-0.00870299
1	-0.00870358
1	0.00870389
1	-0.0087068
1	0.008717
1	-0.00871955
1	-0.00872017
1	-0.00873106
1	-0.00873295
1	0.00873666
1	-0.00873695
1	-0.00874284
1	-0.00874323
1	-0.00874331
1	0.00875159
1	-0.00875497
1	0.00876526
1	0.00877302
1	0.00878556
1	-0.00878683
1	-0.00879279
1	0.00879322
1	-0.00880102
1	0.00880505
1	0.00880721
1	-0.00881519
1	0.00881911
1	-0.00883486
1	-0.00884266
1	0.00884974
1	0.00885213
1	0.00885926
1	-0.00886356
1	-0.00886852
1	-0.00887747
1	-0.00889158
1	0.00891036
1	0.00891562
1	0.00891762
1	0.00892106
1	-0.00892599
1	-0.00893186
1	0.00893624
1	0.00894135
1	0.00894676
1	-0.00896674
1	-0.00897756
1	0.00898305
1	-0.00898623
1	0.00898986
1	-0.00901719
1	0.0090211
1	-0.00902261
1	0.00903274
1	-0.0090419
1	0.00904281
1	-0.00904755
1	0.0090677
1	-0.00908038
1	0.00908338
1	0.00908925
1	-0.00909001
1	0.00909905
1	0.00910333
1	-0.00910995
1	0.00911496
1	0.00912083
1	0.00912118
1	0.0091299
1	0.00913199
1	0.00913683
1	0.00914414
1	-0.00915529
1	-0.009162
1	0.00916478
1	0.0091893
1	-0.00919182
1	-0.00920816
1	0.00921869
1	-0.00922548
1	0.00923067
1	-0.00923245
1	0.00923686
1	-0.00925341
1	0.00925892
1	0.00926706
1	-0.00926933
1	0.00927203
1	-0.0092759
1	-0.0092759
1	-0.0092759
1	-0.00927815
1	0.00928366
1	0.00929148
1	0.00929268
1	-0.00929477
1	-0.00929506
1	0.0092951
1	0.0092953
1	-0.00929967
1	0.00931116
1	0.00931254
1	0.00933118
1	0.00933511
1	0.00933745
1	-0.00934386
1	-0.00934628
1	0.00935173
1	-0.00936407
1	0.00936862
1	-0.00937006
1	0.00937242
1	0.00937409
1	0.00938962
1	0.00940119
1	-0.00940286
1	0.00940366
1	0.00944142
1	0.00945477
1	0.00948647
1	0.00950484
1	0.00950808
1	0.00951218
1	0.00952276
1	0.00952488
1	-0.00953584
1	0.00954644
1	0.00955192
1	0.0095538
1	-0.00955882
1	-0.00956726
1	-0.00956784
1	0.00956786
1	0.00957134
1	0.0095809
1	0.00958103
1	0.00960109
1	0.00961632
1	-0.00962823
1	0.00962863
1	-0.00963595
1	-0.00964477
1	0.00964765
1	0.00965012
1	0.00965821
1	0.00966019
1	0.0096683
1	0.00966934
1	-0.00967252
1	-0.00967345
1	0.00967481
1	0.00967838
1	0.00968509
1	-0.00969582
1	-0.00969873
1	-0.00971336
1	0.00972032
1	0.00972302
1	0.00972786
1	0.00973031
1	-0.00973228
1	0.00974946
1	0.0097509
1	-0.00975197
1	-0.00976657
1	-0.00977859
1	0.00977933
1	-0.00978798
1	-0.00979077
1	0.00979501
1	0.00983834
1	0.00984636
1	0.00984817
1	-0.00986447
1	0.00988048
1	0.00988195
1	0.00989203
1	-0.00990103
1	0.00990728
1	0.00991113
1	0.00991145
1	0.00991264
1	0.00992171
1	0.00992406
1	0.00993005
1	0.00993353
1	0.00993577
1	0.00993814
1	-0.0099536
1	-0.00995446
1	-0.00995917
1	0.00995951
1	0.00996848
1	0.00997746
1	-0.00997827
1	-0.00997962
1	0.00998039
1	0.00999175
1	0.00999488
1	0.0100103
1	-0.0100138
1	-0.0100226
1	-0.0100312
1	0.0100336
1	-0.0100354
1	0.0100434
1	-0.010048
1	0.0100588
1	-0.0100729
1	0.0100946
1	0.0101101
1	-0.010117
1	-0.0101218
1	-0.0101221
1	-0.0101253
1	-0.0101372
1	0.0101451
1	0.0101465
1	0.0101489
1	-0.010152
1	0.0101543
1	0.0101788
1	0.010189
1	-0.0101961
1	-0.0102064
1	0.0102067
1	-0.0102115
1	-0.0102172
1	0.0102221
1	-0.0102236
1	-0.0102384
1	-0.0102394
1	-0.0102439
1	-0.0102447
1	0.0102467
1	0.0102637
1	-0.010264
1	0.0102644
1	-0.0102653
1	0.0102677
1	-0.0102809
1	-0.0102832
1	-0.0102989
1	0.010306
1	-0.0103086
1	0.0103201
1	-0.0103226
1	0.0103294
1	-0.0103304
1	0.0103652
1	0.0103849
1	-0.0103893
1	0.0103927
1	-0.0103945
1	0.0103957
1	0.0103982
1	-0.0103985
1	-0.0104065
1	-0.0104091
1	0.0104218
1	0.0104313
1	0.0104402
1	-0.0104535
1	-0.0104671
1	-0.0104683
1	-0.0104704
1	0.0104725
1	0.0104728
1	0.0104792
1	0.0104808
1	0.0104808
1	0.0104808
1	0.0104808
1	0.0105062
1	-0.0105091
1	-0.01053
1	0.0105355
1	0.0105388
1	-0.0105488
1	0.0105822
1	0.0105879
1	0.010597
1	0.0106148
1	-0.0106194
1	0.010623
1	0.0106269
1	0.0106279
1	-0.0106408
1	-0.0106638
1	0.0106678
1	0.0106793
1	0.0106804
1	0.0106855
1	0.0106889
1	-0.0106918
1	0.010693
1	0.0107023
1	-0.010707
1	-0.0107074
1	-0.0107321
1	-0.0107332
1	0.0107408
1	-0.0107527
1	0.0107574
1	0.0107602
1	0.0107762
1	-0.0107762
1	-0.0107767
1	-0.0107794
1	-0.0107868
1	-0.0108054
1	0.0108085
1	0.010815
1	0.0108168
1	-0.0108173
1	-0.0108174
1	0.0108213
1	0.0108255
1	0.0108311
1	-0.010838
1	-0.0108479
1	-0.0108584
1	-0.0108588
1	-0.0108607
1	0.0108764
1	-0.0108785
1	0.0108899
1	0.0108984
1	0.0109084
1	0.0109162
1	-0.0109183
1	-0.0109239
1	0.0109303
1	-0.0109304
1	0.0109467
1	0.0109511
1	0.0109569
1	0.0109605
1	-0.0109638
1	0.0109722
1	0.0109814
1	-0.010991
1	0.0109916
1	0.0110064
1	0.0110147
1	0.0110148
1	-0.0110295
1	0.0110362
1	-0.0110453
1	-0.0110478
1	-0.0110528
1	-0.0110728
1	0.0110735
1	0.0110986
1	-0.0111033
1	0.0111137
1	0.0111152
1	-0.0111157
1	0.011119
1	-0.0111195
1	0.0111236
1	-0.0111409
1	0.0111417
1	-0.0111428
1	0.0111448
1	-0.0111582
1	0.0111594
1	0.0111656
1	-0.0111672
1	0.0112051
1	0.0112101
1	-0.0112202
1	0.011226
1	-0.0112377
1	-0.0112378
1	0.0112379
1	-0.0112423
1	-0.0112433
1	-0.0112528
1	-0.0112645
1	0.0112734
1	-0.0112843
1	0.0113045
1	0.0113186
1	-0.0113205
1	-0.0113368
1	0.0113396
1	-0.011347
1	-0.0113488
1	-0.0113581
1	-0.0113595
1	-0.0113809
1	-0.011384
1	0.0113852
1	0.0113943
1	0.0114049
1	-0.0114056
1	0.0114241
1	-0.0114282
1	0.0114315
1	-0.0114351
1	0.0114429
1	-0.0114478
1	0.0114488
1	0.0114508
1	0.0114621
1	0.0114653
1	-0.0114665
1	0.0114683
1	0.0114742
1	-0.011478
1	-0.0114851
1	0.0114866
1	-0.0114871
1	0.01149
1	0.0114923
1	0.0114996
1	-0.0115002
1	0.0115011
1	-0.011502
1	0.0115447
1	0.0115491
1	0.0115498
1	0.0115502
1	0.0115517
1	-0.0115618
1	-0.0115739
1	-0.0115812
1	0.0115917
1	-0.0116016
1	-0.0116036
1	0.0116041
1	0.0116059
1	-0.0116106
1	0.0116127
1	-0.0116241
1	0.011625
1	0.0116285
1	0.0116319
1	-0.0116444
1	-0.0116543
1	-0.0116566
1	-0.0116609
1	0.0116648
1	-0.0116733
1	-0.0116887
1	-0.0116888
1	0.0116903
1	0.011696
1	0.0117322
1	-0.0117644
1	0.0117666
1	-0.0117681
1	-0.0117716
1	-0.0117874
1	0.0117885
1	-0.0117948
1	-0.011801
1	0.0118108
1	0.011815
1	0.0118157
1	0.0118241
1	0.0118471
1	-0.0118495
1	0.0118502
1	0.0118564
1	-0.0118585
1	-0.0118607
1	0.0118686
1	0.0118702
1	0.0118756
1	0.0118894
1	0.0118915
1	0.0119009
1	-0.0119031
1	0.0119053
1	0.0119132
1	0.0119156
1	0.0119158
1	-0.011918
1	0.0119193
1	-0.0119237
1	-0.0119241
1	0.0119305
1	0.011931
1	0.0119446
1	0.0119477
1	0.0119759
1	-0.0119904
1	-0.0119909
1	-0.0120158
1	-0.0120271
1	-0.0120429
1	0.0120623
1	-0.0120654
1	-0.0120686
1	-0.0120787
1	0.0120832
1	-0.0120872
1	0.0120876
1	0.0121119
1	-0.012112
1	-0.012112
1	-0.0121203
1	0.012121
1	-0.0121227
1	0.0121422
1	-0.0121452
1	0.0121498
1	0.0121499
1	0.0121536
1	-0.0121546
1	-0.0121583
1	0.0121781
1	-0.012228
1	-0.0122312
1	0.0122476
1	0.0122496
1	0.012257
1	-0.0122748
1	-0.0122801
1	0.0122863
1	-0.0122976
1	-0.0123088
1	0.0123088
1	-0.0123106
1	0.012321
1	0.0123281
1	0.0123379
1	-0.0123469
1	0.0123487
1	-0.01235
1	-0.0123581
1	-0.0123769
1	0.0123794
1	0.0124125
1	-0.0124187
1	-0.0124477
1	0.0124497
1	-0.012453
1	-0.0124609
1	0.0124726
1	-0.0124749
1	0.0124763
1	-0.0124812
1	0.0124879
1	-0.0124922
1	0.0124985
1	0.0125095
1	0.0125131
1	-0.012517
1	-0.0125282
1	-0.0125291
1	-0.0125456
1	0.0125479
1	-0.012549
1	0.0125525
1	0.0125631
1	-0.0125802
1	0.0125829
1	0.0125852
1	0.0125864
1	0.0125959
1	-0.0126041
1	-0.0126041
1	0.0126061
1	-0.0126106
1	-0.0126149
1	0.0126196
1	0.0126343
1	-0.0126352
1	0.0126397
1	0.0126425
1	0.0126459
1	0.0126484
1	0.0126499
1	0.0126654
1	-0.012674
1	0.012681
1	-0.012687
1	0.0126925
1	-0.0126944
1	-0.0126945
1	-0.0127046
1	0.0127053
1	0.0127119
1	-0.0127159
1	0.0127173
1	-0.0127177
1	-0.0127181
1	0.0127235
1	-0.0127254
1	-0.0127328
1	0.0127333
1	-0.0127373
1	0.0127397
1	-0.0127445
1	0.0127481
1	-0.0127553
1	-0.0127689
1	-0.0127841
1	-0.0127851
1	0.0128105
1	-0.0128121
1	-0.0128132
1	-0.012815
1	0.0128212
1	0.0128408
1	0.0128448
1	0.0128483
1	-0.0128572
1	0.0128641
1	0.0128856
1	-0.012909
1	-0.0129127
1	0.012919
1	-0.0129228
1	-0.0129234
1	-0.0129276
1	0.0129356
1	-0.0129463
1	0.0129474
1	-0.0129544
1	0.0129558
1	0.0129649
1	0.0129679
1	0.0129705
1	0.012988
1	0.0129894
1	-0.0129931
1	-0.0130133
1	-0.0130251
1	-0.0130267
1	-0.0130281
1	0.0130312
1	0.0130393
1	-0.0130466
1	0.0130497
1	0.0130533
1	-0.0130605
1	-0.0130606
1	0.0130665
1	0.0130853
1	0.0130853
1	-0.0130967
1	0.0130997
1	0.0131088
1	-0.0131182
1	-0.0131271
1	0.0131404
1	-0.0131472
1	-0.0131554
1	0.0131756
1	0.0131765
1	0.013186
1	0.0131868
1	-0.0131899
1	-0.0132018
1	-0.0132085
1	-0.0132226
1	0.0132369
1	0.0132545
1	0.0132566
1	0.0132583
1	-0.0132656
1	-0.0132697
1	-0.0132856
1	0.0132881
1	-0.0132985
1	-0.0133096
1	0.0133119
1	0.0133132
1	-0.0133405
1	0.013365
1	0.0133818
1	0.0133944
1	-0.0133996
1	0.0134282
1	0.0134509
1	-0.0134529
1	0.0134653
1	0.0134672
1	0.0134788
1	0.0134827
1	-0.0134834
1	-0.0134843
1	0.0134945
1	0.013495
1	-0.0134999
1	0.0135059
1	-0.013507
1	0.0135273
1	0.0135285
1	-0.0135349
1	0.0135358
1	0.0135533
1	-0.013559
1	0.0135635
1	0.013565
1	-0.0135689
1	-0.0135839
1	-0.0135907
1	0.0136112
1	0.0136121
1	0.0136244
1	0.0136312
1	0.0136385
1	-0.0136492
1	-0.0136548
1	0.0136581
1	0.0136607
1	-0.0136624
1	0.0136701
1	-0.0136723
1	0.0136784
1	-0.0136977
1	0.0137029
1	-0.013716
1	-0.0137236
1	0.0137259
1	0.0137298
1	0.013731
1	-0.0137325
1	-0.0137327
1	0.0137351
1	-0.0137442
1	-0.0137477
1	0.0137482
1	-0.0137664
1	0.0137718
1	0.013772
1	0.0137797
1	0.0137837
1	-0.0137916
1	-0.0137949
1	-0.0138064
1	0.0138178
1	0.0138517
1	-0.0138584
1	-0.013862
1	-0.0138712
1	-0.0138752
1	-0.0138916
1	0.013893
1	-0.0138962
1	0.0139117
1	-0.0139141
1	0.0139203
1	0.0139537
1	0.013959
1	0.0139645
1	0.0139949
1	0.0140007
1	0.0140156
1	-0.0140202
1	0.0140244
1	0.0140323
1	-0.0140371
1	-0.014044
1	0.014049
1	-0.0140502
1	-0.0140515
1	0.0140622
1	-0.0140659
1	-0.0140661
1	0.0140751
1	0.0140797
1	0.0140965
1	-0.0141128
1	-0.0141323
1	0.0141474
1	-0.0141523
1	0.0141617
1	0.0141755
1	0.0141851
1	-0.0141916
1	-0.0141937
1	0.0141954
1	-0.0142014
1	-0.0142102
1	-0.0142175
1	-0.0142219
1	0.0142404
1	0.0142434
1	-0.0142687
1	-0.01428
1	0.0142824
1	-0.014288
1	-0.0142953
1	-0.0143216
1	-0.0143233
1	-0.0143235
1	-0.0143266
1	0.0143271
1	-0.0143345
1	0.0143385
1	0.0143407
1	0.0143501
1	0.0143542
1	-0.014361
1	0.0143675
1	-0.0143741
1	-0.0143782
1	0.0144107
1	-0.0144186
1	0.0144219
1	-0.0144348
1	-0.0144429
1	-0.014445
1	-0.0144455
1	-0.0144471
1	0.0144517
1	0.0144548
1	0.0144561
1	0.0144584
1	0.0144642
1	-0.0144669
1	0.0144691
1	0.0144913
1	0.0144959
1	0.014503
1	-0.0145088
1	-0.0145176
1	-0.0145186
1	-0.0145201
1	0.0145235
1	0.0145255
1	-0.0145266
[truncated: 577,549+ more rows]

## Sheet: 5FdUR_UNGKO_Shu
Replication timing group	log2 uracil enrichment
1	0.00012166
1	-0.000133312
1	-0.000142681
1	0.000155431
1	-0.000174539
1	0.000178454
1	0.000193682
1	-0.000203392
1	0.000206952
1	-0.00020858
1	0.000212351
1	-0.000216741
1	-0.000221186
1	0.000229937
1	-0.000230643
1	-0.000233276
1	-0.000242691
1	-0.000258479
1	0.000269978
1	0.000272489
1	-0.000273233
1	-0.000277871
1	0.000283438
1	0.000291847
1	-0.000302303
1	0.000311023
1	-0.00031275
1	-0.000313214
1	-0.000314025
1	0.000321352
1	-0.000327387
1	0.000328994
1	0.000335319
1	-0.00033804
1	-0.000343999
1	0.000344723
1	0.000347392
1	-0.000350376
1	-0.000366525
1	-0.000390586
1	0.000400501
1	-0.000404985
1	0.00041227
1	0.000415636
1	-0.000415844
1	-0.000422904
1	0.000423498
1	0.000431328
1	0.000433439
1	0.000441559
1	0.00045367
1	0.000457694
1	-0.000469206
1	-0.00047283
1	0.000489065
1	0.000489749
1	0.000492044
1	0.000492953
1	-0.00049587
1	-0.000509283
1	-0.00051465
1	0.000518145
1	-0.000526246
1	0.000533087
1	-0.00053838
1	0.000552419
1	0.000556352
1	-0.000559951
1	-0.000570047
1	-0.000574844
1	-0.000592656
1	0.000603361
1	-0.000612363
1	-0.000617598
1	-0.000628166
1	0.000639584
1	-0.000646042
1	0.000661983
1	0.000664289
1	0.000664888
1	0.000667851
1	0.000673735
1	0.000674203
1	0.000678245
1	0.000685936
1	0.000688793
1	-0.000690633
1	-0.00069635
1	-0.000707893
1	0.000710247
1	0.000711933
1	0.000715766
1	0.00071589
1	0.000720658
1	-0.000738756
1	-0.000739324
1	0.000743346
1	0.000743942
1	0.000761581
1	-0.000770663
1	-0.000774135
1	-0.000776311
1	-0.00078022
1	0.000781132
1	-0.000787592
1	-0.00078988
1	0.000795887
1	0.000797028
1	-0.000799513
1	0.000805222
1	0.000822094
1	-0.000828292
1	-0.000832281
1	0.000855983
1	-0.000865883
1	0.000874477
1	-0.000888438
1	-0.000892552
1	-0.000894377
1	-0.000897058
1	-0.000906471
1	0.000919486
1	-0.000926916
1	0.000931342
1	-0.000933918
1	-0.000937165
1	0.000961183
1	0.000967918
1	0.000984721
1	0.000992832
1	-0.000999668
1	0.00100582
1	-0.00100714
1	-0.00101056
1	0.00102465
1	0.00103289
1	-0.00103318
1	-0.00103739
1	-0.00103809
1	-0.00103841
1	0.00104254
1	-0.00104369
1	-0.00105848
1	-0.00107822
1	-0.00108006
1	-0.00112153
1	-0.0011523
1	0.00118317
1	-0.00119269
1	-0.00119856
1	-0.00120009
1	-0.001203
1	0.00120759
1	0.0012145
1	0.0012158
1	-0.00122727
1	0.00123495
1	0.00123815
1	0.00125533
1	-0.00125566
1	0.00126549
1	0.0012699
1	0.00127184
1	0.0012736
1	0.00127511
1	0.00127547
1	-0.00127723
1	-0.00127866
1	-0.00129514
1	-0.001305
1	0.00130685
1	0.00134516
1	-0.00135108
1	0.00136892
1	-0.0013923
1	0.00139522
1	0.00139764
1	-0.00139888
1	-0.00139985
1	-0.00140061
1	0.00140079
1	0.00140472
1	0.0014053
1	0.00141188
1	-0.00141561
1	-0.00143012
1	0.00143486
1	-0.00143544
1	-0.00143654
1	-0.00145125
1	-0.00146093
1	-0.00146328
1	0.0014636
1	0.00149007
1	0.00150708
1	-0.00150824
1	-0.00152089
1	-0.00152833
1	0.00153331
1	0.00153837
1	-0.00155844
1	-0.00156203
1	0.00157172
1	0.00157309
1	0.00157583
1	0.00158413
1	-0.00159416
1	-0.00159516
1	-0.00161102
1	-0.00161108
1	-0.00161464
1	0.00161923
1	-0.00162201
1	0.00164807
1	-0.00165573
1	-0.00166035
1	-0.00166334
1	-0.00166469
1	-0.00166988
1	-0.00168355
1	0.00169109
1	0.00169295
1	-0.00170727
1	-0.0017154
1	-0.00171631
1	0.00171793
1	-0.0017291
1	-0.00174883
1	-0.00175999
1	0.00176214
1	-0.00176433
1	-0.0017647
1	-0.00176755
1	-0.0017843
1	0.00178619
1	0.00178833
1	-0.00179566
1	0.00180185
1	-0.00180445
1	-0.00181584
1	-0.00184442
1	-0.00184881
1	0.00185528
1	-0.00185826
1	-0.0018638
1	-0.00186838
1	-0.00186893
1	-0.00187889
1	0.00188089
1	-0.00188915
1	-0.00188915
1	0.00190425
1	-0.00190499
1	-0.00191807
1	0.00192066
1	0.00195578
1	0.00197135
1	-0.00197247
1	0.00199661
1	-0.00200312
1	-0.00200848
1	0.00205628
1	0.00206442
1	-0.00207101
1	-0.00207128
1	0.00207944
1	0.00209651
1	-0.00210045
1	0.00211649
1	0.00213392
1	-0.00213805
1	0.00214137
1	-0.00214484
1	0.00214837
1	0.00214932
1	0.00215794
1	0.00215851
1	0.0021694
1	-0.00217759
1	0.00218505
1	-0.00218585
1	-0.0022002
1	-0.00220652
1	-0.0022076
1	-0.00221174
1	0.00221625
1	0.00222073
1	0.00223015
1	0.00225031
1	-0.00226062
1	0.00226303
1	-0.00226582
1	0.00226693
1	-0.00226895
1	-0.00227069
1	-0.00228006
1	-0.00228246
1	-0.00228393
1	-0.0022908
1	0.00229553
1	0.00230512
1	0.00230673
1	0.0023114
1	0.00231374
1	-0.00231661
1	-0.00231814
1	0.00231858
1	0.00232328
1	0.00233368
1	-0.00236026
1	-0.00236629
1	-0.00238953
1	-0.00240319
1	-0.00241955
1	0.00243631
1	0.00245377
1	-0.00246385
1	-0.00247053
1	0.00247453
1	0.00247566
1	-0.00247941
1	-0.00248193
1	-0.00248563
1	-0.00249203
1	0.00254386
1	0.00255168
1	0.00255327
1	0.00255552
1	-0.00256093
1	0.00256514
1	0.00257015
1	0.00258521
1	-0.00258678
1	0.0025934
1	0.00259812
1	-0.00260806
1	-0.00262325
1	0.00263222
1	0.00263348
1	-0.00264807
1	0.00265779
1	-0.00267037
1	0.00268694
1	0.00269032
1	-0.00269956
1	-0.0027078
1	-0.00270914
1	0.00271751
1	-0.00271884
1	-0.00273673
1	0.00276176
1	-0.0027707
1	-0.00277753
1	0.00277874
1	-0.00278341
1	0.00278386
1	-0.00278987
1	-0.00280102
1	0.00281221
1	-0.00281326
1	0.00281447
1	0.0028365
1	0.0028463
1	0.00286232
1	0.00286336
1	0.00286836
1	-0.00287558
1	-0.00288251
1	0.00288613
1	-0.00288614
1	0.00288631
1	-0.00290621
1	0.00292506
1	0.00292781
1	-0.00293599
1	0.00294147
1	0.00294969
1	-0.00295279
1	0.00297638
1	0.00297639
1	0.00298243
1	0.00298783
1	-0.00299546
1	-0.00300006
1	-0.0030062
1	-0.00302167
1	0.00302719
1	0.00303187
1	-0.00303774
1	0.00304688
1	-0.00304689
1	0.00304746
1	-0.00305657
1	0.00305877
1	-0.00306962
1	0.00307369
1	0.00307502
1	0.00308171
1	-0.00308511
1	0.00308755
1	0.00309372
1	-0.00309984
1	-0.00310276
1	-0.00311307
1	-0.00311918
1	0.00312239
1	0.00312605
1	0.0031351
1	0.00313874
1	0.00316081
1	0.00318891
1	-0.00319809
1	0.00321695
1	-0.00322623
1	0.00323316
1	0.00325487
1	-0.00325676
1	-0.00325944
1	-0.00327261
1	-0.00327361
1	0.00328742
1	0.00328771
1	-0.00329248
1	-0.00329575
1	0.00330284
1	0.00330403
1	0.00330778
1	-0.00332261
1	0.00332637
1	-0.00333859
1	-0.00333903
1	-0.0033398
1	-0.00335313
1	0.00337233
1	-0.00337264
1	0.00337266
1	0.00337883
1	0.00339212
1	-0.00339541
1	0.00340399
1	-0.00340895
1	-0.00341009
1	0.00343352
1	0.00343932
1	-0.00347625
1	-0.00350949
1	0.00351697
1	0.00351948
1	0.00352459
1	-0.00352693
1	0.00353955
1	0.00354146
1	-0.00355118
1	-0.00355252
1	-0.003567
1	-0.00356854
1	-0.00357271
1	0.00358018
1	-0.00359005
1	0.00361166
1	0.00362815
1	0.00363268
1	0.00364729
1	0.00366393
1	-0.00367247
1	-0.00367481
1	-0.00368067
1	-0.00368206
1	-0.00369309
1	-0.00370803
1	-0.00371029
1	-0.0037148
1	-0.00371483
1	-0.00371848
1	-0.00372757
1	-0.00373753
1	-0.00373942
1	-0.00373943
1	-0.00373943
1	0.00376192
1	0.00376834
1	0.00378222
1	-0.00378852
1	0.00378919
1	0.00379072
1	0.00380425
1	-0.00381625
1	-0.00382341
1	-0.0038245
1	0.00382989
1	-0.0038427
1	-0.0038559
1	-0.00389438
1	-0.00389569
1	-0.00389612
1	0.00390536
1	0.00390911
1	0.00391456
1	-0.00392431
1	0.00394489
1	-0.00394491
1	0.00395119
1	0.00396673
1	-0.0039718
1	0.00399027
1	-0.00399477
1	0.00400038
1	-0.00401874
1	0.004026
1	0.00402675
1	0.00404319
1	0.00404704
1	0.00407448
1	-0.00407883
1	0.00409021
1	-0.00409839
1	-0.00410362
1	-0.00410641
1	0.00410671
1	0.00410865
1	-0.00411402
1	-0.0041266
1	-0.00412717
1	-0.00412858
1	0.00414148
1	0.00415881
1	0.00416211
1	-0.00417483
1	-0.00419434
1	-0.00419595
1	-0.00420598
1	-0.00421901
1	0.00423574
1	-0.00423885
1	0.00427149
1	0.00429638
1	-0.00432184
1	0.00434506
1	0.00434836
1	0.00435392
1	-0.00436551
1	0.00437485
1	-0.00440716
1	-0.00440717
1	-0.0044087
1	-0.00441402
1	-0.00441619
1	0.00441929
1	0.00442196
1	-0.00442814
1	-0.00443562
1	0.00443715
1	-0.00444018
1	0.00444398
1	-0.00444905
1	-0.00446903
1	0.00447975
1	-0.00448546
1	-0.00449689
1	0.0045028
1	0.00451936
1	0.00453014
1	-0.00453661
1	-0.00454123
1	-0.00455332
1	-0.00455889
1	0.00456169
1	0.00456686
1	0.00456921
1	0.00459607
1	0.00460833
1	0.00461605
1	0.00462574
1	0.00463003
1	-0.00463742
1	-0.00463951
1	-0.00464929
1	-0.00466838
1	0.00468961
1	0.00469039
1	0.0047027
1	-0.00471057
1	-0.00473964
1	-0.00474285
1	0.00474309
1	-0.00475154
1	0.00476853
1	-0.00476992
1	0.00477429
1	0.00477496
1	0.00477687
1	0.0047775
1	0.00478512
1	0.00480186
1	0.00480926
1	0.00481444
1	-0.0048341
1	0.00483432
1	-0.00483561
1	0.00484871
1	0.00484958
1	-0.00485325
1	0.00485913
1	-0.00488999
1	0.00490142
1	-0.00490273
1	-0.00490402
1	0.00491063
1	-0.00491292
1	0.00492035
1	0.00492324
1	0.00492544
1	0.00492988
1	0.00493605
1	0.0049464
1	0.00495809
1	-0.00499694
1	0.00502225
1	-0.00502239
1	0.00502328
1	-0.00502787
1	0.00503254
1	0.00504348
1	0.00505159
1	0.00505444
1	0.00507081
1	0.00507145
1	0.00507264
1	-0.00510954
1	0.0051167
1	-0.00512383
1	-0.00513248
1	-0.00513248
1	-0.00513316
1	0.00513865
1	0.00515381
1	0.00515774
1	-0.00515898
1	0.00516185
1	-0.0051756
1	0.00518004
1	0.00518297
1	-0.00518309
1	-0.00518339
1	-0.00519088
1	-0.00519961
1	0.00520093
1	0.00520105
1	0.00520365
1	-0.00524879
1	0.00525139
1	-0.0052651
1	0.00527374
1	0.00527864
1	-0.00528091
1	-0.00529348
1	-0.00529486
1	-0.00529539
1	-0.00530784
1	0.00530798
1	0.00531001
1	-0.0053101
1	-0.00531128
1	-0.00532126
1	-0.0053218
1	-0.00533908
1	0.00534115
1	0.0053465
1	-0.0053497
1	-0.00535138
1	-0.00536068
1	-0.00538428
1	-0.0053908
1	0.00539494
1	0.00541132
1	-0.00542186
1	0.00542751
1	-0.00543251
1	-0.00543968
1	0.00544141
1	-0.00546007
1	-0.00546586
1	-0.00549219
1	-0.00549644
1	0.00551647
1	-0.00552466
1	-0.0055272
1	-0.00552866
1	0.00555111
1	-0.00556472
1	-0.00556824
1	0.00557079
1	-0.00557955
1	0.00558583
1	-0.00559193
1	-0.00559262
1	-0.00560741
1	0.00561143
1	0.00562725
1	-0.00563032
1	-0.00563542
1	0.0056381
1	-0.00565758
1	-0.00565758
1	-0.00565758
1	-0.00565758
1	-0.00565758
1	-0.00565758
1	-0.00565758
1	-0.00565758
1	-0.00565758
1	-0.00565758
1	-0.00565758
1	-0.00565758
1	-0.00565758
1	-0.00565758
1	-0.00565758
1	-0.00565758
1	-0.00565758
1	-0.00565758
1	-0.00565758
1	-0.00565758
1	-0.00565758
1	-0.00565758
1	-0.00565758
1	-0.00565758
1	0.00566841
1	-0.00567158
1	0.0056919
1	0.00569451
1	-0.00570234
1	0.0057092
1	-0.00571084
1	0.00571534
1	0.00571696
1	0.00572435
1	-0.00573079
1	0.00573438
1	-0.00574136
1	0.00574255
1	0.00574531
1	0.00576108
1	0.0057715
1	-0.00577172
1	0.00577671
1	-0.0057825
1	-0.00578953
1	-0.00579155
1	0.00579391
1	-0.00580328
1	0.00583466
1	0.00583783
1	-0.00584223
1	-0.00584745
1	-0.00585958
1	0.00586271
1	-0.00586628
1	0.0058807
1	-0.00590778
1	-0.00591586
1	-0.00591674
1	-0.00591997
1	0.00592388
1	-0.00592934
1	0.00593041
1	0.00593279
1	0.00593545
1	-0.00594367
1	0.00594797
1	0.00596644
1	-0.00597109
1	0.00597575
1	0.00597576
1	-0.00597797
1	-0.00597936
1	-0.00598191
1	0.00599087
1	0.00600082
1	-0.00600388
1	0.00601146
1	-0.00601539
1	-0.00602001
1	0.00602788
1	0.00603676
1	0.00603887
1	-0.00605896
1	-0.00606035
1	0.00607074
1	0.00607308
1	0.00610906
1	0.0061151
1	0.00612024
1	0.00614015
1	0.00615053
1	0.00615714
1	-0.00615877
1	0.00616429
1	0.00617206
1	0.00618806
1	0.00623839
1	-0.0062436
1	-0.00624729
1	0.00625144
1	-0.00625554
1	0.00627005
1	-0.00627092
1	-0.00627272
1	0.00627726
1	-0.0062775
1	0.00628324
1	0.00630083
1	-0.00630534
1	-0.00631602
1	-0.00631868
1	-0.00633237
1	0.00633435
1	0.00633541
1	-0.00637832
1	0.00641029
1	-0.0064131
1	0.00643794
1	-0.00643964
1	-0.0064534
1	-0.00645687
1	0.00647258
1	-0.00647919
1	0.00648342
1	0.00649186
1	0.00649626
1	0.00650173
1	-0.0065036
1	0.00650758
1	-0.00651599
1	0.00651839
1	-0.00654093
1	0.00654317
1	0.00654639
1	0.00655064
1	0.00657031
1	0.00658134
1	-0.00659218
1	0.00659385
1	-0.0065948
1	0.00660222
1	-0.00662301
1	-0.00662481
1	0.00662854
1	0.00665301
1	-0.00665899
1	0.00666046
1	-0.00667026
1	0.0066758
1	0.00668475
1	0.0066914
1	0.00670946
1	0.00673268
1	-0.00673567
1	0.00674162
1	0.00675257
1	0.0067671
1	-0.0067675
1	0.00679776
1	-0.00680519
1	0.00682255
1	0.0068278
1	0.00685877
1	0.00686079
1	-0.00686605
1	0.00686768
1	0.00687019
1	-0.00687497
1	-0.00687918
1	0.00689497
1	-0.00690553
1	0.00692554
1	-0.00692891
1	0.00693158
1	0.00694484
1	0.00696269
1	-0.00697075
1	0.00697265
1	0.0069824
1	-0.00698326
1	-0.00699542
1	0.00701854
1	0.007019
1	-0.00702157
1	-0.007052
1	0.00705964
1	0.00706357
1	0.00707825
1	-0.00708283
1	0.00709492
1	-0.0071056
1	-0.00710686
1	0.00710995
1	0.00713099
1	-0.0071344
1	0.00713467
1	-0.00713468
1	0.00713994
1	0.0071465
1	-0.00718001
1	0.00718684
1	-0.00720259
1	-0.00720298
1	0.00720996
1	0.00721254
1	0.00721896
1	0.00722298
1	-0.00723387
1	-0.00723987
1	-0.00725589
1	0.00727807
1	0.00727942
1	0.00728818
1	-0.00729463
1	-0.00730187
1	-0.00730702
1	0.00730962
1	0.00732439
1	-0.00733804
1	-0.0073498
1	-0.00735661
1	0.00736404
1	0.00737387
1	-0.00738974
1	0.00740545
1	-0.00741344
1	-0.00741829
1	0.00742016
1	-0.00742099
1	0.00743235
1	0.00743256
1	0.00743679
1	0.00743851
1	-0.00743901
1	0.00744068
1	-0.0074509
1	-0.00745207
1	0.00745392
1	-0.0074544
1	-0.0074907
1	-0.00749567
1	-0.00749647
1	0.00750314
1	-0.00750337
1	0.00751612
1	0.00753235
1	-0.00753364
1	-0.00753364
1	-0.0075369
1	-0.0075369
1	-0.0075369
1	-0.0075369
1	-0.00756149
1	0.00756225
1	-0.00756268
1	-0.0075661
1	0.00756856
1	0.00757772
1	0.00758298
1	-0.00759383
1	0.00759974
1	0.00761197
1	-0.00761271
1	-0.00761527
1	0.00761698
1	0.00763074
1	-0.00764331
1	-0.00764539
1	-0.00764704
1	0.00765194
1	-0.00768188
1	-0.00768433
1	0.00768818
1	-0.00769533
1	0.00769739
1	-0.007705
1	0.00771148
1	-0.00772653
1	0.00772813
1	0.00773122
1	0.00773566
1	0.00773623
1	0.00775583
1	-0.00777525
1	-0.00779426
1	-0.00781285
1	-0.00783672
1	0.00786427
1	-0.00787879
1	0.00788195
1	-0.00788833
1	-0.00788858
1	-0.0079057
1	0.0079087
1	-0.00791245
1	0.00791389
1	0.00793509
1	0.00794388
1	-0.00794872
1	-0.00795237
1	0.00795421
1	-0.00796593
1	-0.00798216
1	-0.00798661
1	-0.00799858
1	-0.00801624
1	-0.00802407
1	-0.00803635
1	-0.00804257
1	0.00805135
1	0.0080634
1	-0.00807661
1	-0.00808289
1	-0.00810011
1	-0.00810607
1	-0.00812791
1	0.00816788
1	0.00819794
1	0.00819794
1	0.00819794
1	0.00819794
1	0.00819794
1	0.00819794
1	0.00819807
1	-0.00820104
1	0.00820165
1	0.00820179
1	0.00820179
1	0.00820179
1	0.00820179
1	0.00820179
1	0.00820179
1	-0.00820269
1	0.00821294
1	0.00821379
1	-0.00822022
1	0.00822439
1	0.00822491
1	0.00822858
1	0.00822902
1	0.00824293
1	-0.00824546
1	0.00825218
1	0.00825586
1	0.00827097
1	-0.00827672
1	-0.00827958
1	0.00828774
1	0.00830824
1	0.0083157
1	-0.00831836
1	-0.00832217
1	0.00834481
1	-0.00834702
1	-0.00835044
1	0.00835045
1	0.00836963
1	0.00837834
1	0.00839458
1	0.00839741
1	0.00840557
1	-0.00840802
1	0.00841994
1	-0.00844495
1	0.00845571
1	0.00847493
1	0.00848803
1	0.00849129
1	0.00849295
1	-0.0084945
1	0.00850854
1	0.00851634
1	0.00852148
1	-0.00853707
1	0.00854596
1	0.0085479
1	-0.00855432
1	0.00856004
1	0.00856084
1	0.00860333
1	-0.00861433
1	-0.00861713
1	-0.00862495
1	-0.00862827
1	0.00863063
1	-0.00864877
1	-0.00865081
1	-0.00865851
1	-0.00868084
1	-0.00868461
1	0.0086948
1	-0.00869657
1	0.00869734
1	-0.00869838
1	-0.00870034
1	0.00870563
1	0.0087113
1	-0.00871964
1	-0.00873509
1	0.00874588
1	-0.00877857
1	0.00877862
1	0.00880275
1	-0.00882363
1	-0.00884436
1	-0.0088472
1	-0.00884858
1	-0.00884969
1	-0.00885124
1	-0.00888416
1	-0.00889638
1	-0.00891154
1	0.00891453
1	-0.00891468
1	0.00891847
1	-0.00892291
1	-0.00894757
1	0.00895353
1	-0.00895605
1	-0.00896194
1	-0.00896447
1	-0.00898042
1	-0.00899371
1	-0.00901639
1	-0.00903837
1	0.00904704
1	-0.00905074
1	-0.00906963
1	-0.00907051
1	-0.00907896
1	-0.00908938
1	-0.00910787
1	-0.00911187
1	-0.00912798
1	0.00913018
1	-0.00913297
1	-0.00913401
1	0.00914147
1	0.00916306
1	-0.00916594
1	0.00917192
1	-0.00918068
1	0.00918145
1	0.00919264
1	0.00920946
1	0.00922807
1	0.00922854
1	-0.00924544
1	0.00924935
1	0.00925064
1	0.00925621
1	-0.0092682
1	0.00928608
1	-0.00928642
1	-0.00929028
1	0.009298
1	0.00929802
1	0.00929961
1	-0.00931376
1	-0.00931498
1	-0.00931931
1	0.00931971
1	0.00932081
1	0.00932537
1	0.00932923
1	-0.00933297
1	-0.00933617
1	0.0093492
1	-0.00935191
1	-0.00936077
1	0.00936459
1	0.00936698
1	-0.00936823
1	0.0093731
1	0.00937339
1	0.00937565
1	-0.00937698
1	0.00938261
1	-0.00938735
1	-0.00941295
1	-0.00941295
1	-0.00941295
1	-0.00941295
1	-0.00941295
1	-0.00941295
1	-0.00941987
1	-0.00942137
1	-0.00942405
1	0.00943604
1	-0.00943901
1	0.00944585
1	0.00944585
1	-0.00945711
1	-0.00945728
1	0.00946378
1	0.00950451
1	0.00950994
1	-0.00951159
1	-0.00951551
1	-0.00954015
1	0.00954094
1	-0.0095452
1	-0.00955534
1	0.00957017
1	-0.00957018
1	-0.0095757
1	0.00957745
1	-0.00958011
1	0.00958328
1	-0.00958508
1	0.00959001
1	-0.00959215
1	-0.00959356
1	-0.00959544
1	0.00959558
1	-0.00959793
1	0.00960838
1	0.00961675
1	0.00961963
1	-0.00964635
1	0.00965196
1	0.00965551
1	-0.00968897
1	0.00969971
1	0.00971884
1	-0.00972488
1	-0.00973188
1	-0.00974127
1	-0.00974628
1	0.00974799
1	-0.00975035
1	0.00976171
1	0.00976705
1	0.00977484
1	0.00977863
1	-0.00978092
1	0.00980672
1	0.0098077
1	-0.0098105
1	-0.00981306
1	-0.00981391
1	-0.0098151
1	-0.00981552
1	0.00982526
1	0.00982588
1	-0.00982665
1	-0.00984295
1	-0.00985015
1	-0.00985144
1	0.00986959
1	-0.0098885
1	0.00989885
1	-0.00991879
1	0.00991922
1	0.00992714
1	-0.00993552
1	0.00994259
1	0.00994357
1	-0.00994598
1	-0.00994705
1	-0.00996378
1	0.00998348
1	-0.00999151
1	-0.00999593
1	-0.00999644
1	0.0100207
1	-0.0100295
1	0.0100327
1	-0.0100374
1	0.0100499
1	0.0100525
1	0.0100594
1	-0.0100601
1	-0.010061
1	0.0100624
1	0.0100668
1	-0.0100755
1	-0.0100809
1	-0.0100809
1	-0.0100896
1	0.01009
1	0.0100983
1	-0.0101048
1	0.0101109
1	0.0101157
1	-0.0101186
1	0.0101408
1	0.0101416
1	0.0101447
1	-0.01016
1	-0.0101814
1	0.0101832
1	0.0101932
1	0.0102015
1	-0.010215
1	-0.0102246
1	-0.010227
1	-0.0102343
1	0.0102426
1	0.0102426
1	0.0102577
1	-0.0102694
1	-0.0102818
1	0.010289
1	-0.0102905
1	-0.0102908
1	-0.0103116
1	-0.0103333
1	0.010346
1	-0.0103591
1	0.0103785
1	-0.0104051
1	-0.010406
1	0.0104302
1	-0.010444
1	0.0104687
1	-0.0104697
1	0.0104931
1	0.0105246
1	0.010557
1	0.010558
1	0.0105897
1	0.0105979
1	0.0106019
1	0.0106058
1	0.0106119
1	0.0106138
1	-0.0106263
1	0.0106278
1	0.0106466
1	-0.0106636
1	0.0106705
1	0.010672
1	-0.0106732
1	0.0106736
1	-0.0106779
1	-0.0106914
1	0.0106966
1	0.010698
1	-0.0107021
1	0.0107239
1	0.0107262
1	-0.0107362
1	-0.0107495
1	-0.0107516
1	-0.0107595
1	-0.0107736
1	0.0107917
1	-0.0107964
1	-0.0107975
1	-0.0107984
1	0.0107991
1	-0.0108203
1	0.010823
1	-0.0108261
1	-0.0108273
1	0.0108324
1	0.0108347
1	0.0108509
1	0.010872
1	0.0108745
1	0.0108825
1	-0.0108874
1	-0.0108892
1	0.0108893
1	-0.0108923
1	-0.0109108
1	-0.0109391
1	-0.0109447
1	0.0109674
1	-0.01097
1	-0.0109708
1	-0.0109733
1	-0.0109785
1	0.0109844
1	0.0109908
1	-0.0110102
1	0.0110202
1	0.0110294
1	0.0110299
1	-0.0110474
1	-0.0110494
1	-0.0110573
1	-0.0110923
1	-0.0110929
1	-0.011105
1	0.0111132
1	0.0111175
1	0.0111188
1	-0.0111203
1	-0.0111209
1	0.0111457
1	-0.0111492
1	-0.0111635
1	-0.0111795
1	-0.0111883
1	0.011197
1	0.0112159
1	0.0112241
1	0.011228
1	0.0112464
1	0.0112483
1	-0.0112489
1	-0.0112494
1	0.0112512
1	0.011255
1	0.0112595
1	-0.0112707
1	-0.0112809
1	-0.0112809
1	-0.0112825
1	-0.0112825
1	-0.0112825
1	-0.0112858
1	-0.0112858
1	-0.0112858
1	-0.0112858
1	-0.011294
1	0.0112952
1	-0.011308
1	0.0113211
1	-0.0113273
1	0.0113285
1	-0.0113359
1	-0.0113761
1	-0.011385
1	-0.0113913
1	-0.0114076
1	-0.0114115
1	-0.0114316
1	-0.0114321
1	-0.0114369
1	-0.0114515
1	-0.0114721
1	-0.0114722
1	0.0114741
1	0.0114768
1	-0.0114803
1	0.0114805
1	0.0114859
1	0.0114913
1	-0.0114917
1	0.0114964
1	0.011502
1	0.0115295
1	-0.0115362
1	-0.0115373
1	-0.0115439
1	-0.0115534
1	0.0115711
1	0.0115847
1	-0.0115867
1	0.0115992
1	0.0116007
1	0.0116094
1	-0.0116126
1	-0.0116199
1	-0.0116289
1	-0.0116333
1	-0.0116437
1	0.0116487
1	-0.0116507
1	0.0116568
1	-0.0116853
1	-0.0117024
1	0.0117061
1	0.0117195
1	0.0117227
1	0.011724
1	-0.0117362
1	0.0117409
1	0.0117424
1	-0.0117471
1	-0.0117523
1	-0.0117523
1	-0.0117537
1	0.0117564
1	-0.0117582
1	-0.0117597
1	0.0117619
1	-0.0117783
1	-0.0117826
1	0.0117845
1	0.0117956
1	-0.0117993
1	0.0118034
1	0.011837
1	0.0118388
1	0.011839
1	0.0118446
1	-0.0118634
1	-0.011881
1	0.0118817
1	0.0118872
1	-0.0118904
1	0.0118976
1	-0.011898
1	0.0119074
1	-0.0119085
1	0.0119093
1	0.0119155
1	0.0119248
1	-0.0119254
1	0.0119332
1	-0.0119339
1	-0.0119516
1	-0.0119556
1	-0.0119558
1	-0.0119743
1	-0.0119831
1	-0.0119847
1	0.0119985
1	-0.0120239
1	-0.0120326
1	0.0120357
1	-0.0120474
1	0.0120733
1	-0.0120796
1	0.0120844
1	-0.0120861
1	0.0121114
1	0.0121223
1	-0.0121227
1	-0.0121493
1	0.0121497
1	0.012155
1	-0.0121584
1	0.0121631
1	0.0121784
1	0.0121785
1	0.0121816
1	-0.0121844
1	-0.0121892
1	0.0121989
1	-0.0122102
1	-0.0122134
1	0.0122197
1	-0.0122249
1	-0.0122262
1	0.0122359
1	-0.0122479
1	0.0122651
1	0.0122726
1	0.0122726
1	0.0122738
1	0.0122738
1	0.0122738
1	0.0122738
1	0.0122738
1	0.0122738
1	0.0122738
1	0.0122738
1	0.0122738
1	0.0122738
1	0.0122738
1	0.0122738
1	0.0122738
1	0.0122738
1	0.0122738
1	0.0122739
1	-0.0122754
1	0.0122834
1	-0.0122973
1	-0.0123027
1	0.0123082
1	-0.0123083
1	0.0123139
1	-0.0123166
1	0.0123226
1	-0.0123265
1	0.0123405
1	-0.0123428
1	-0.0123462
1	0.0123571
1	0.0123581
1	-0.0123602
1	-0.0123663
1	0.0123674
1	0.0123697
1	-0.0123784
1	-0.0123795
1	-0.0123872
1	0.0123931
1	0.0123934
1	-0.0124004
1	-0.0124047
1	-0.0124269
1	-0.0124383
1	0.0124531
1	0.0124583
1	0.0124596
1	-0.0124635
1	0.0124707
1	-0.012482
1	0.0124841
1	0.0124922
1	-0.0124943
1	0.0124974
1	-0.0125003
1	0.0125009
1	0.0125023
1	-0.0125241
1	0.0125272
1	-0.0125324
1	-0.0125328
1	0.0125337
1	0.0125757
1	-0.0125874
1	0.0125921
1	-0.0125973
1	0.0126134
1	-0.0126379
1	0.0126486
1	0.012653
1	0.0126666
1	-0.0126677
1	0.0126846
1	-0.0126872
1	0.0127029
1	-0.012703
1	0.0127033
1	0.012704
1	-0.0127204
1	0.0127205
1	-0.0127285
1	0.0127375
1	-0.0127379
1	0.0127401
1	-0.0127421
1	-0.012747
1	-0.0127617
1	0.012778
1	-0.0127846
1	-0.0127941
1	0.0127949
1	0.012798
1	-0.0128095
1	0.0128229
1	-0.012832
1	0.0128355
1	0.0128418
1	-0.0128596
1	0.0128619
1	0.0128663
1	0.0128792
1	-0.0128841
1	-0.0128842
1	-0.0128942
1	-0.0128968
1	-0.0128975
1	-0.0129022
1	-0.0129391
1	-0.0129569
1	-0.0129581
1	0.0129706
1	0.0129751
1	-0.0129774
1	0.012979
1	-0.013004
1	-0.0130139
1	0.0130144
1	0.0130148
1	0.0130213
1	0.013025
1	-0.0130326
1	0.0130369
1	0.0130608
1	-0.0130662
1	0.0130736
1	0.0130772
1	-0.0130886
1	0.0131059
1	0.0131187
1	-0.0131201
1	-0.0131226
1	-0.0131362
1	0.0131475
1	-0.0131508
1	0.0131534
1	-0.0131632
1	-0.0131732
1	0.0131872
1	-0.0131901
1	-0.0131992
1	-0.0132021
1	-0.0132041
1	0.0132208
1	-0.0132216
1	-0.0132304
1	-0.0132336
1	0.0132381
1	-0.0132582
1	0.0132612
1	-0.0132693
1	-0.0132842
1	0.0132942
1	-0.0133181
1	0.0133191
1	0.0133287
1	-0.0133312
1	-0.0133392
1	-0.01336
1	0.0133612
1	0.0133718
1	0.0133733
1	0.0133784
1	-0.0133802
1	-0.0133829
1	-0.0133839
1	-0.0133919
1	-0.0134034
1	-0.0134066
1	0.0134108
1	0.0134239
1	0.0134265
1	-0.0134385
1	0.0134441
1	0.0134553
1	0.0134676
1	0.0134757
1	-0.0134769
1	-0.0134774
1	0.0134846
1	-0.0134983
1	-0.013504
1	-0.0135114
1	-0.0135139
1	0.0135144
1	0.0135168
1	0.0135171
1	-0.0135193
1	0.0135401
1	0.0135403
1	0.0135437
1	-0.0135438
1	-0.0135622
1	-0.0135722
1	0.0135969
1	-0.0136046
1	-0.0136046
1	0.013605
1	0.0136143
1	-0.0136222
1	-0.0136246
1	-0.0136249
1	-0.0136313
1	0.0136373
1	-0.0136466
1	-0.0136467
1	0.0136475
1	0.0136619
1	-0.013663
1	-0.013667
1	-0.0136712
1	0.0136769
1	0.0136791
1	-0.0136801
1	0.0136811
1	0.0136826
1	-0.0136888
1	-0.0136996
1	-0.0137026
1	-0.013706
1	0.0137123
1	-0.0137164
1	-0.0137188
1	0.0137262
1	-0.0137361
1	-0.0137367
1	-0.0137369
1	-0.0137401
1	-0.0137476
1	-0.0137532
1	0.0137674
1	-0.0137712
1	-0.0137734
1	-0.0137737
1	-0.0137799
1	0.0137894
1	0.0137988
1	0.0138051
1	0.0138228
1	-0.0138305
1	-0.0138373
1	0.0138513
1	-0.0138842
1	0.0139029
1	-0.0139118
1	0.0139177
1	0.0139378
1	-0.0139396
1	-0.0139488
1	-0.0139525
1	-0.013956
1	-0.0139601
1	-0.013964
1	0.0139678
1	0.0139835
1	-0.0139899
1	-0.0139998
1	-0.0140194
1	0.0140301
1	-0.0140525
1	0.0140644
1	0.0140774
1	-0.0140829
1	0.0141196
1	-0.0141208
1	-0.0141298
1	0.0141426
1	0.0141444
1	-0.0141513
1	-0.0141543
1	0.0141645
1	-0.0141713
1	0.0141759
1	-0.014176
1	0.0141856
1	0.0141862
1	0.0141939
1	0.0141981
1	0.014209
1	-0.0142113
1	0.0142184
1	0.0142186
1	-0.0142204
1	0.0142216
1	0.0142231
1	-0.0142273
1	-0.0142307
1	0.0142409
1	0.0142436
1	0.0142663
1	-0.0142676
1	-0.0142703
1	-0.0142721
1	0.0142725
1	-0.0142733
1	0.0142786
1	-0.0142946
1	-0.0142983
1	-0.0143019
1	-0.0143034
1	-0.0143226
1	0.0143257
1	0.0143297
1	0.014331
1	-0.0143413
1	-0.0143614
1	-0.0143788
1	0.0143841
1	-0.0143893
1	-0.0143895
1	-0.0144087
1	0.0144109
1	-0.0144186
1	-0.0144324
1	0.0144349
1	0.0144546
1	0.0144557
1	-0.0144562
1	-0.0144773
1	0.0144848
1	0.0144907
1	-0.0144943
1	-0.0144956
1	-0.0144956
1	-0.0145059
1	0.014508
1	-0.0145084
1	-0.0145106
1	-0.0145757
1	0.0145787
1	-0.014626
1	-0.0146463
1	0.0146467
1	0.0146469
1	0.0146513
1	0.0146634
1	0.0146758
1	-0.0146979
1	0.0146996
1	-0.0147033
1	-0.0147258
1	-0.014747
1	-0.0147928
1	0.0147936
1	-0.0147958
1	-0.0148016
1	-0.0148088
1	0.0148167
1	-0.0148235
1	-0.0148282
1	0.0148416
1	-0.0148433
1	0.0148525
1	-0.0148596
1	-0.0148689
1	0.0148781
1	0.0148899
1	-0.0148972
1	0.0148975
1	0.0148998
1	0.014904
1	-0.0149077
1	-0.0149111
1	-0.0149133
1	0.0149167
1	-0.0149176
1	-0.014924
1	0.0149317
1	0.0149363
1	0.0149378
1	0.0149462
1	0.0149499
1	-0.0149506
1	-0.0149561
1	-0.0149595
1	-0.0149818
1	-0.0149873
1	0.0150023
1	-0.0150024
1	-0.0150058
1	0.0150104
1	-0.0150153
1	-0.0150153
1	-0.0150153
1	-0.0150153
1	0.0150396
1	0.0150468
1	-0.0150489
1	0.0150513
1	-0.0150517
1	0.0150534
1	-0.0150647
1	-0.0150668
1	0.0150753
1	-0.0150893
1	0.0150962
1	-0.0151
1	0.0151027
1	0.0151043
1	-0.0151055
1	-0.0151157
1	0.0151189
1	-0.0151205
1	-0.015127
1	0.0151283
1	-0.0151307
1	0.0151308
1	-0.0151351
1	0.015136
1	0.0151459
1	0.015164
1	-0.0151721
1	0.0151808
1	0.0151911
1	-0.0151975
1	-0.0152215
1	0.0152279
1	-0.0152279
1	0.0152292
1	0.0152726
1	0.0152744
1	-0.0152869
1	-0.0153059
1	-0.0153101
1	0.0153151
1	0.0153178
1	-0.0153207
1	0.0153287
1	0.0153393
1	-0.0153443
1	0.0153497
1	0.0153543
1	-0.0153653
1	-0.0153685
1	0.0153776
1	0.0153933
1	-0.0153957
1	0.0154014
1	-0.0154026
1	0.0154094
1	-0.0154111
1	0.0154221
1	-0.0154222
1	-0.0154254
1	-0.0154301
1	-0.0154485
1	-0.0154485
1	-0.0154494
1	-0.0154704
1	-0.0154723
1	-0.0154863
1	0.0154956
1	0.0154961
[truncated: 576,753+ more rows]
