# Supplementary material for: Genome-wide alterations of uracil distribution patterns in human DNA upon chemotherapeutic treatments
Source: PubMed Central journal article supplement (PMC7505663; doi:10.7554/elife.60498), 2020-09-21

1  
2  
3

## Supplementary file 2

### IGV views of log2 ratio and regions of uracil enrichment on all the chromosomes

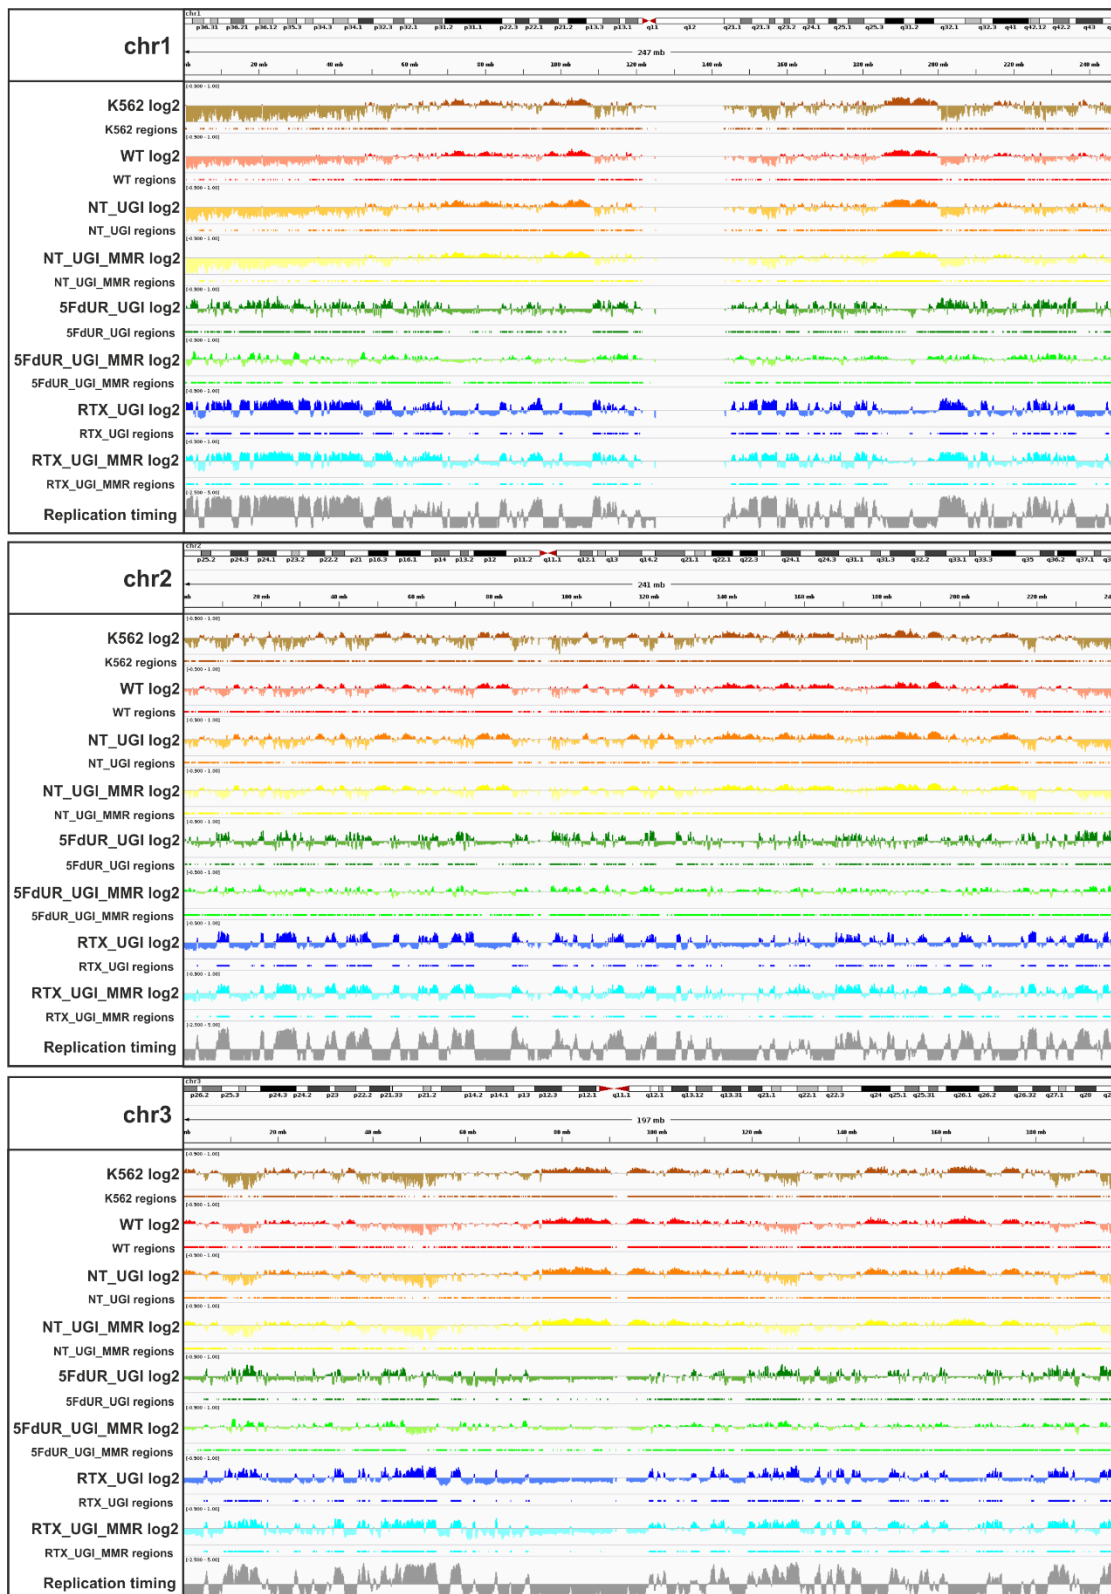

4

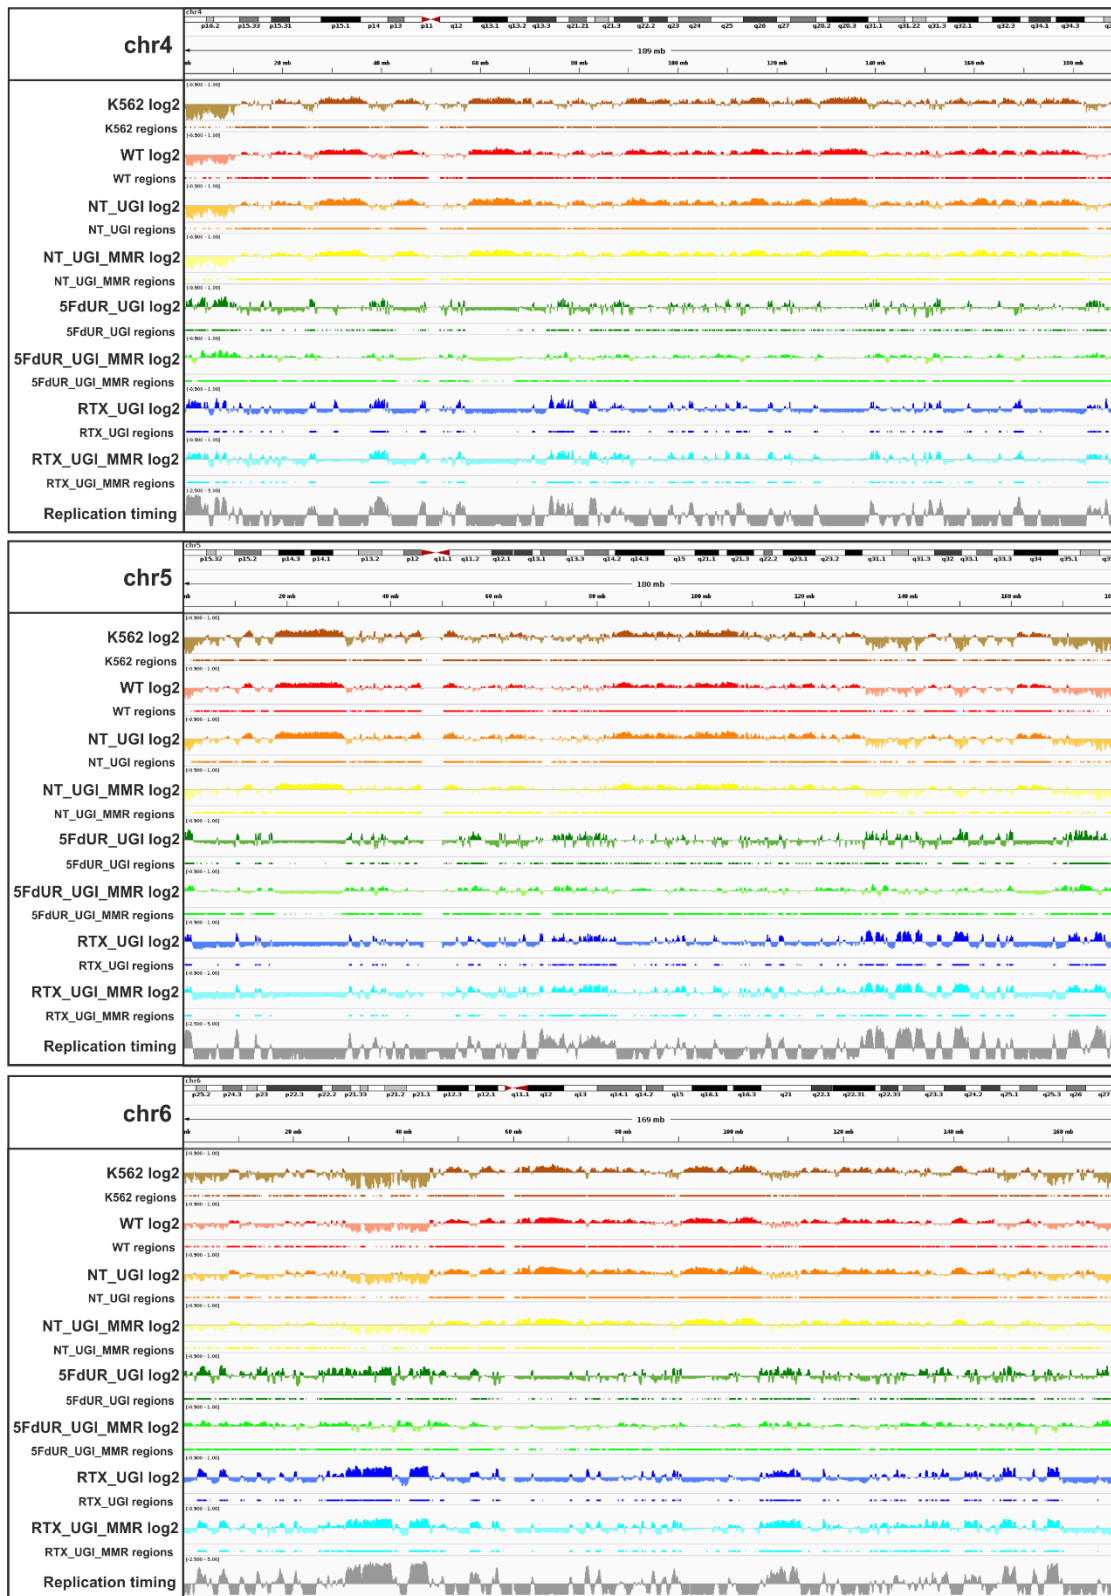

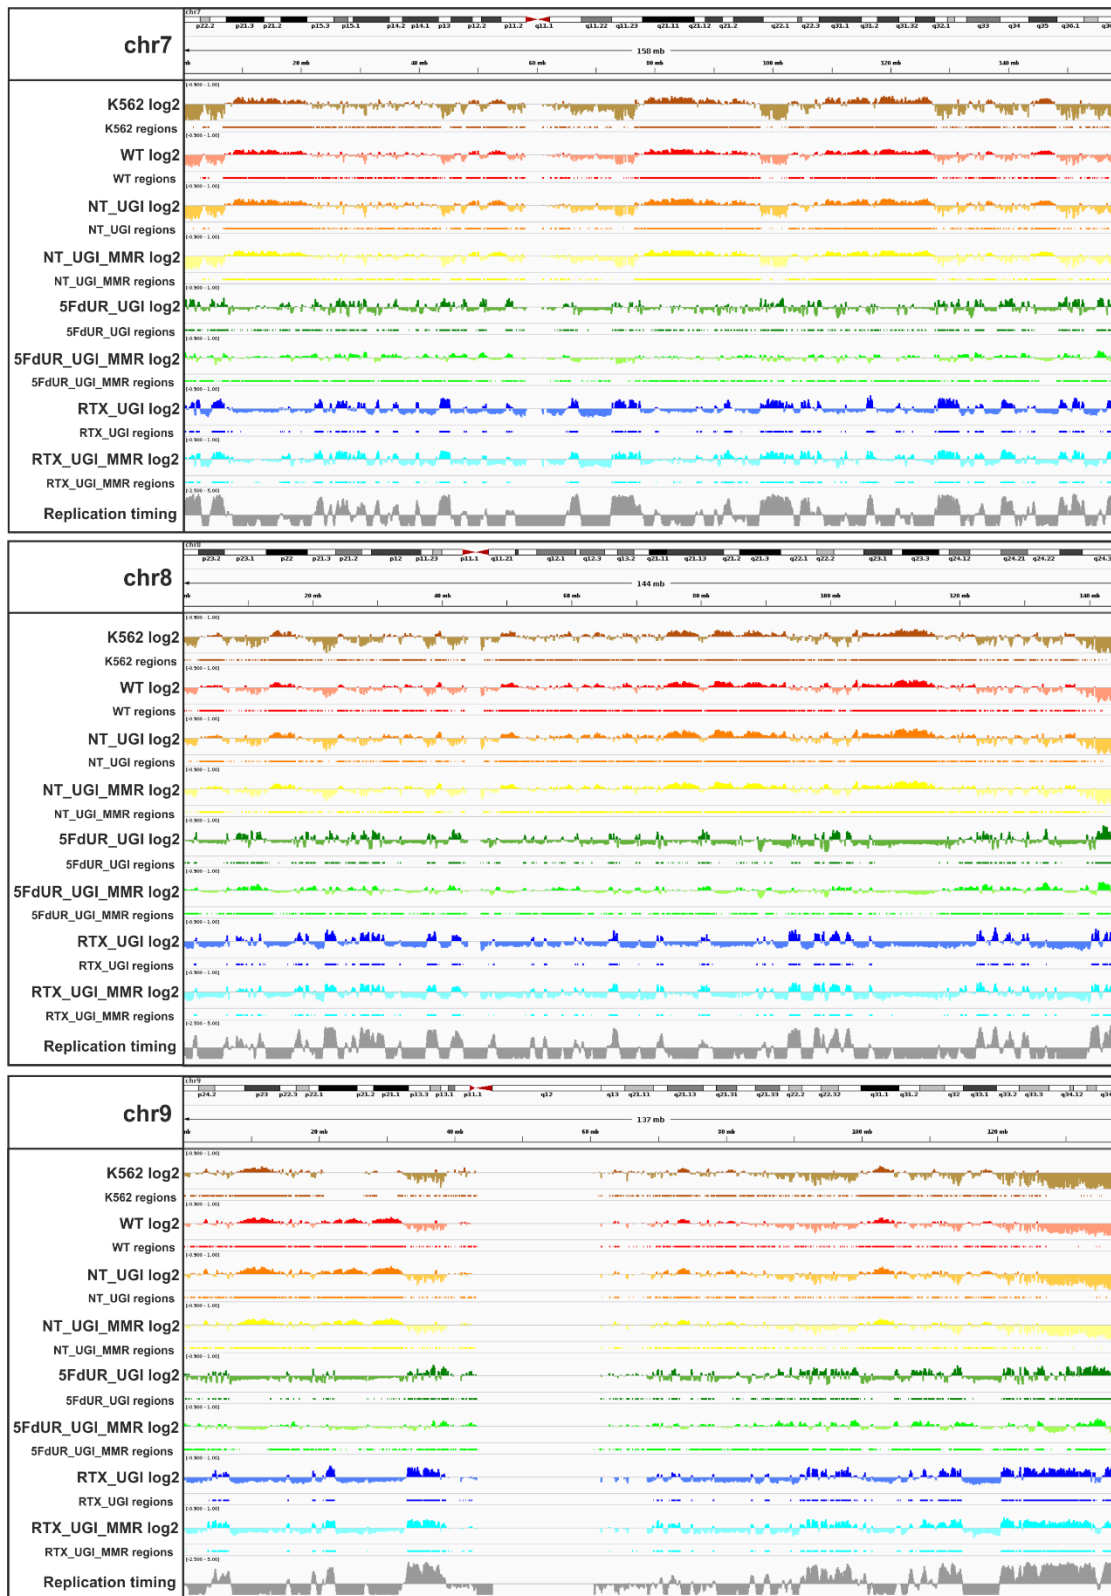

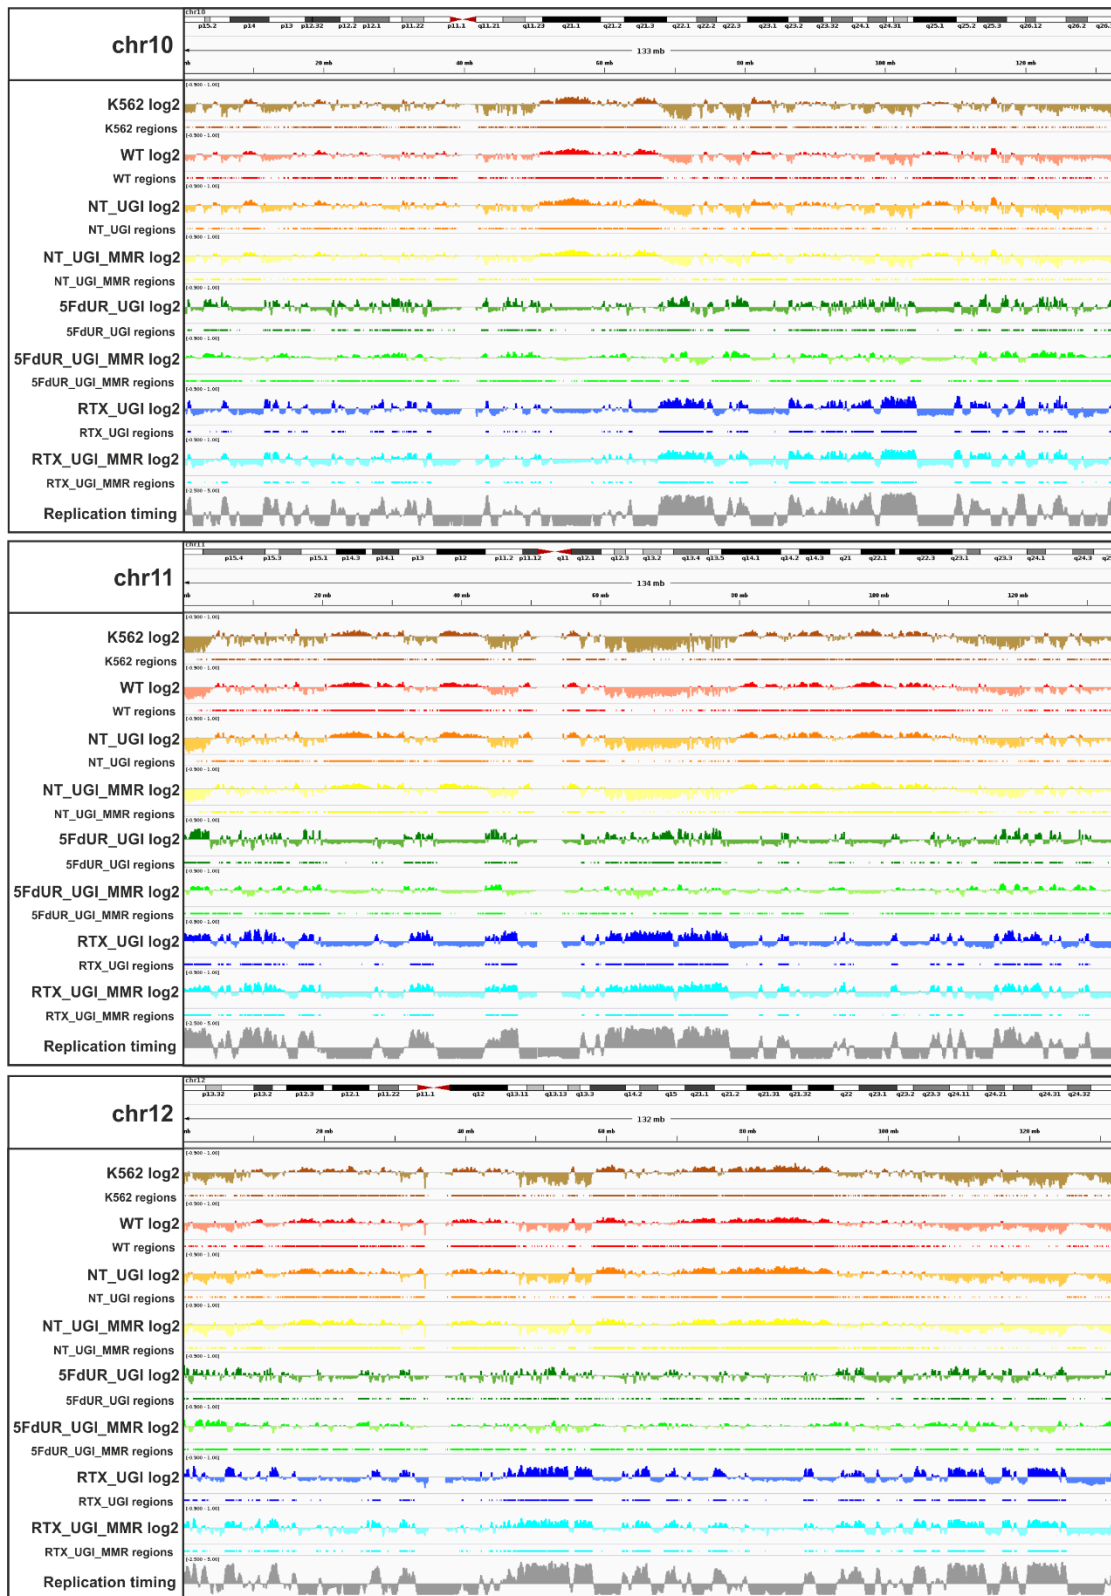

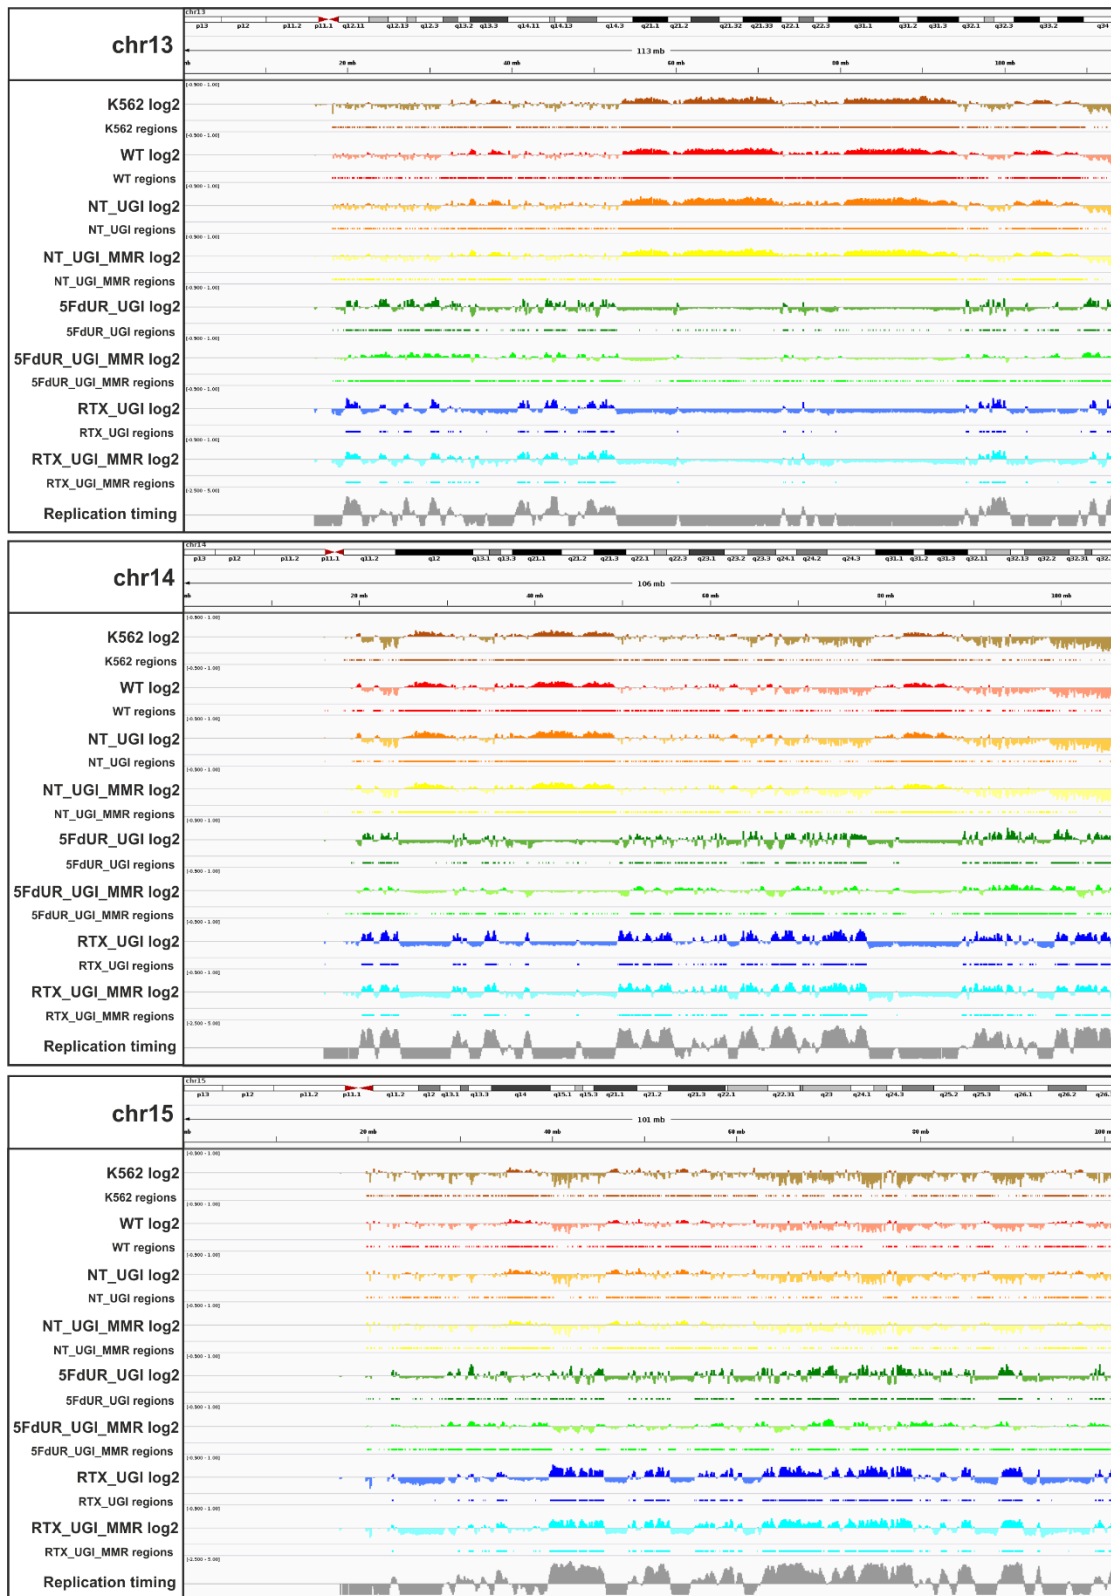

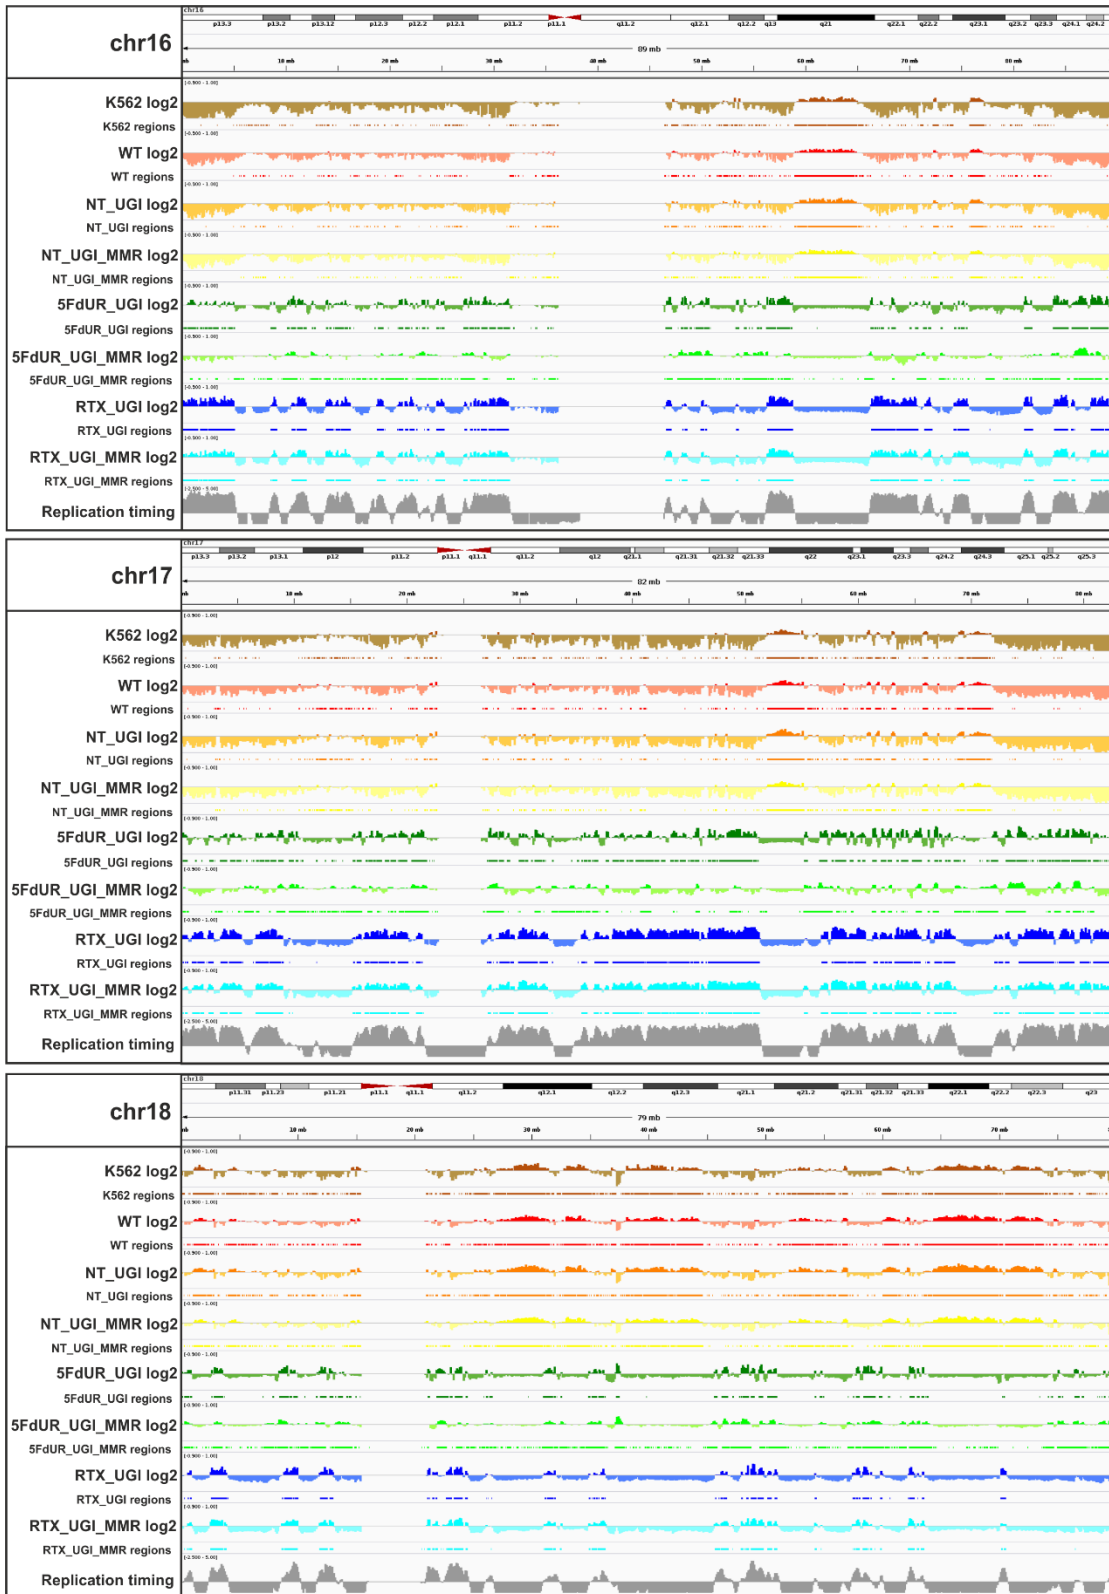

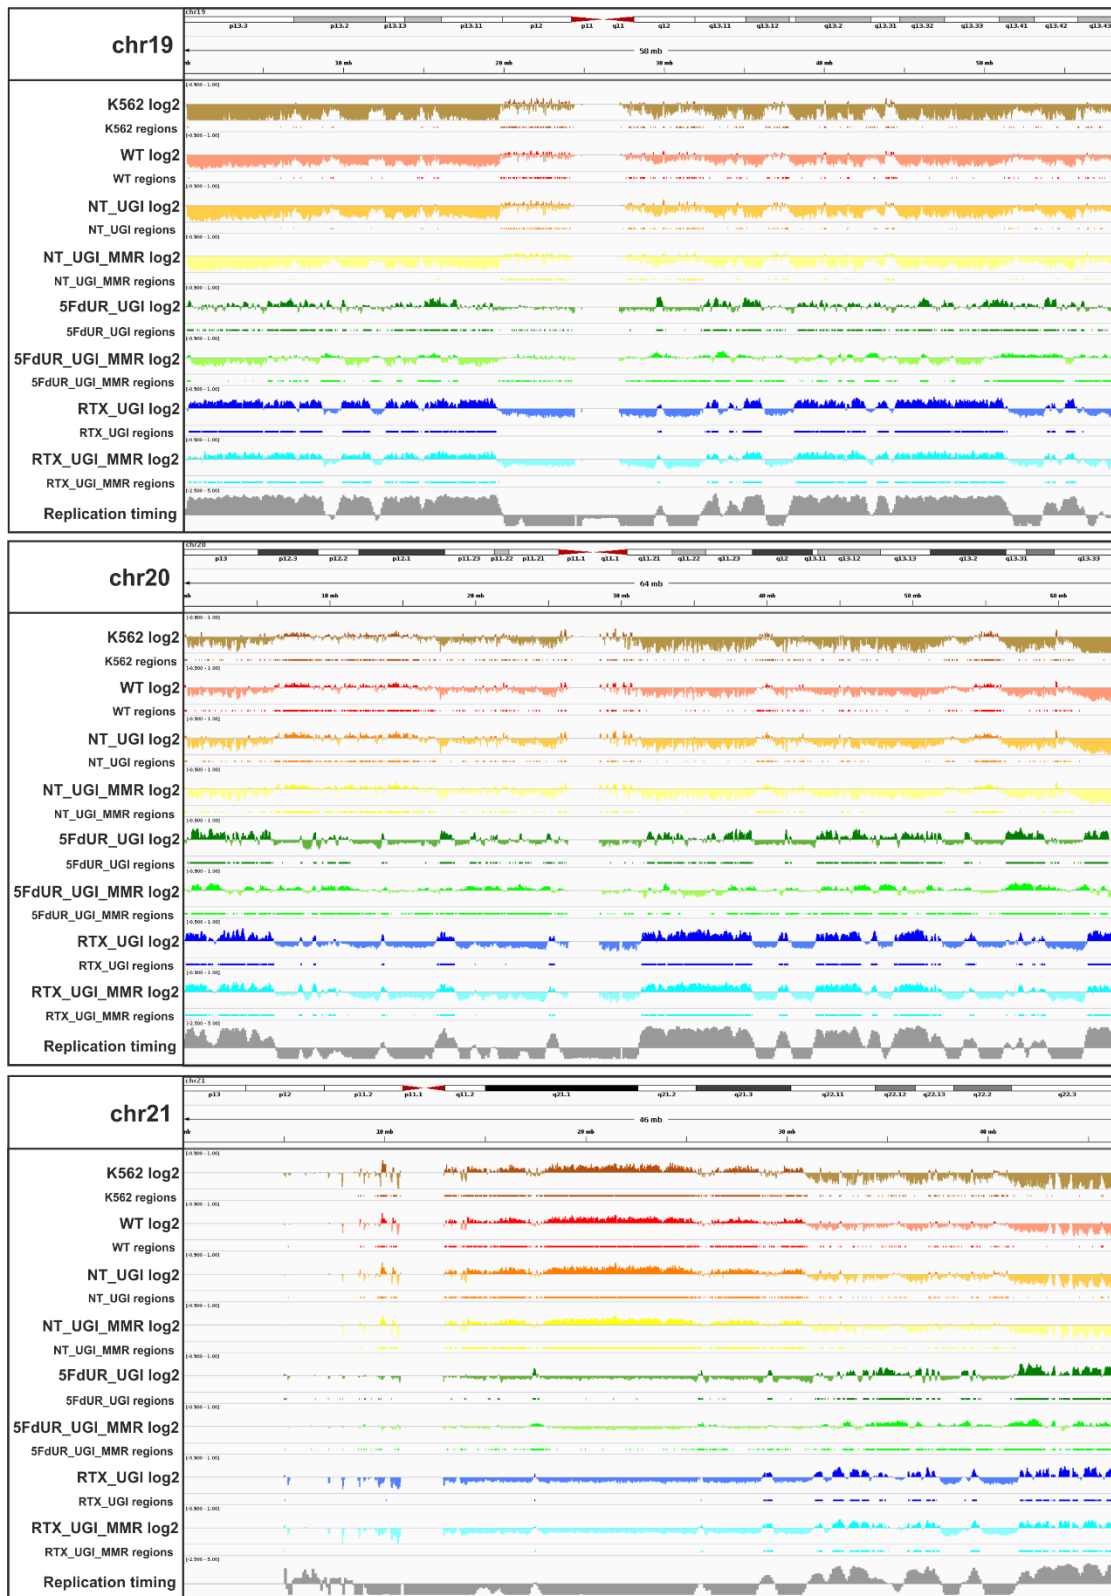

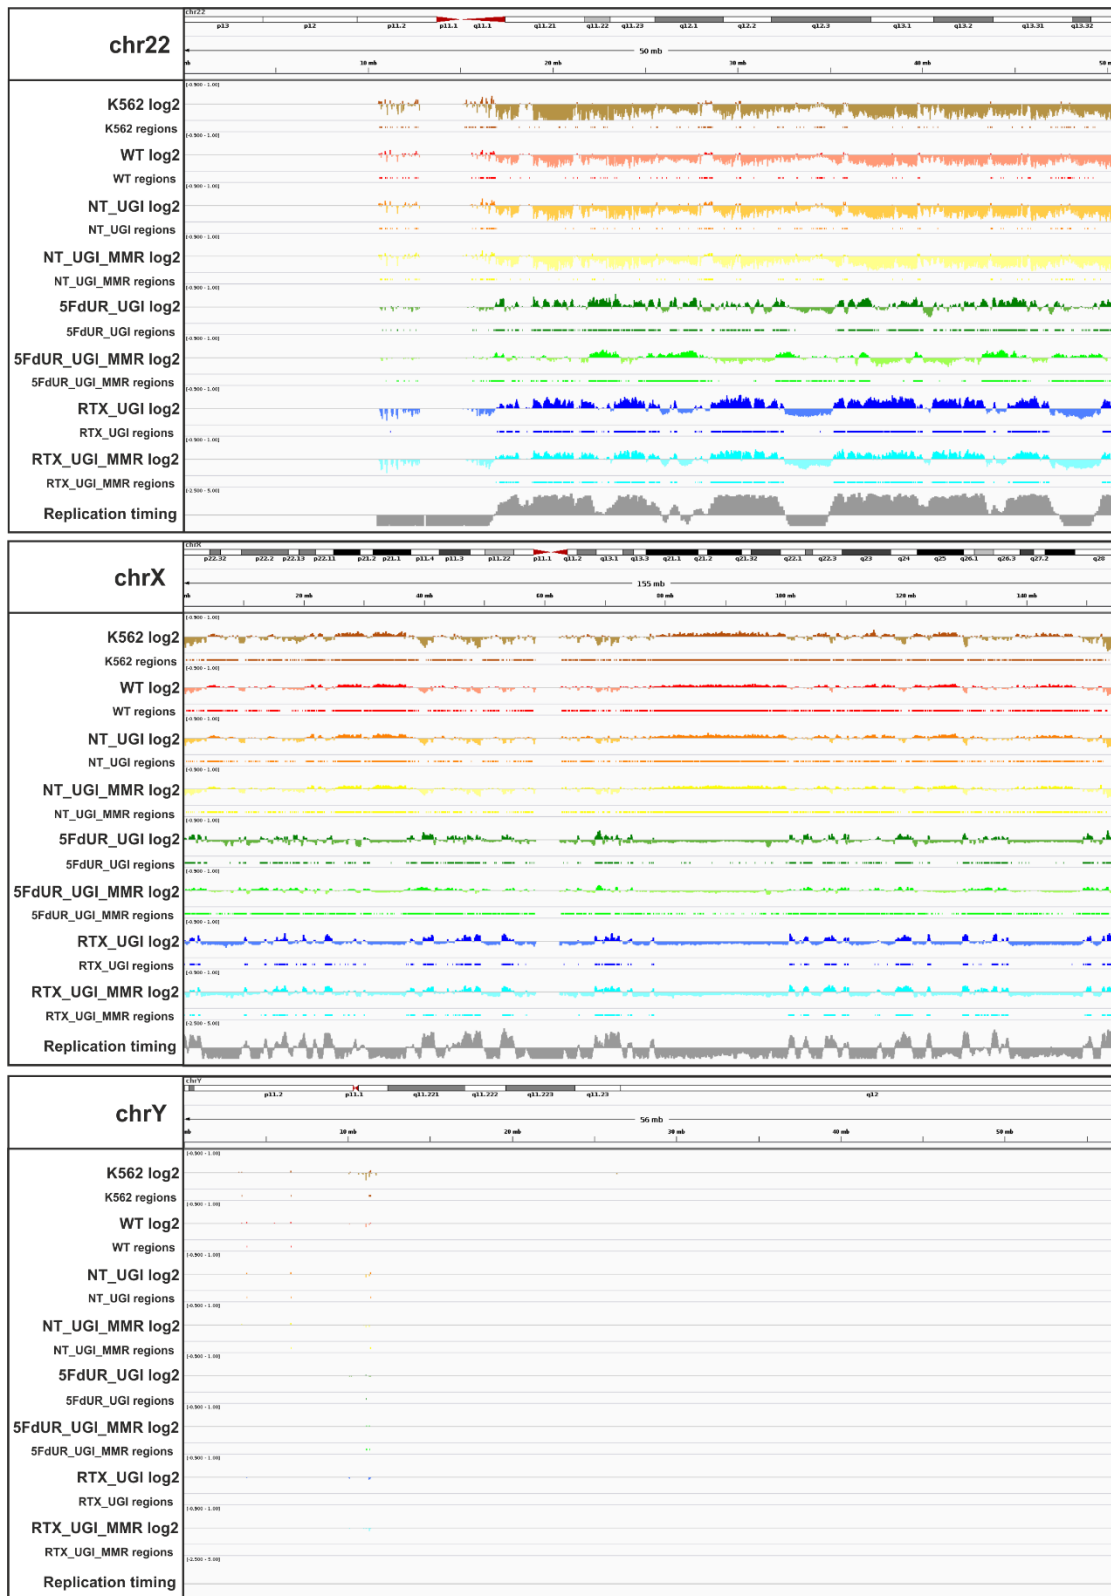

Supplement: elife-60498-supp2.pdf [file elife-60498-supp2.pdf]
