# Supplementary material for: Genome-wide alterations of uracil distribution patterns in human DNA upon chemotherapeutic treatments
Source: PubMed Central journal article supplement (PMC7505663; doi:10.7554/elife.60498), 2020-09-21
Supplement: elife-60498-supp3.pdf [file elife-60498-supp3.pdf]

### Supplementary file 3

#### Genome-wide analysis of uracil-DNA pattern comparing to ChIP-seq and DNA accessibility data using either GIGGLE search or the Segway genome segmentation tool.

##### Collection of HCT116 related ChIP-seq and DNA accessibility data.

To find colocalizing binding factors and other genomic features, first a HCT116 specific or relevant set of data were collected. On the one hand, from Cistrome database (<http://cistrome.org/db/#/>, (Mei et al., 2017), data reflect the state of 17 July 2019), overall, 542 ChIP-seq data made in HCT116 for transcription factors or histone markers were downloaded as interval (bed) files. Although, these data are still heterogeneous regarding quality and the applied treatments, it is definitely more reasonable than searching in the whole Cistrome database without any restriction for cell types. Only those data were comprised that contained more than 400 intervals (471 files remained). It also has to be noted that no controls (such as input samples in our case) are considered in the evaluation pipeline of Cistrome. To strengthen this dataset, further HCT116-specific ChIP-seq data (36 bed files) were downloaded from ENCODE

([https://www.encodeproject.org/search/?type=Experiment&status=released&replicates.library.biosample.donor.organism.scientific\\_name=Homo+sapiens&assembly=GRCh38&biosample\\_ontology.classification=cell+line&biosample\\_ontology.term\\_name=HCT116](https://www.encodeproject.org/search/?type=Experiment&status=released&replicates.library.biosample.donor.organism.scientific_name=Homo+sapiens&assembly=GRCh38&biosample_ontology.classification=cell+line&biosample_ontology.term_name=HCT116) (ENCODE Project Consortium, 2012)), where evaluation pipeline (<https://www.encodeproject.org/pages/pipelines/>) considers controls and includes many quality measures, and the resulted “replicated peaks” reflect only the consensus peaks of replicates and pseudo-replicates. Further 27 bed files were downloaded from the Ensembl database ((Zerbino et al., 2018), release 97, July 2019, [ftp://ftp.ensembl.org/pub/release-97/regulation/homo\\_sapiens/Peaks/HCT116/](ftp://ftp.ensembl.org/pub/release-97/regulation/homo_sapiens/Peaks/HCT116/)). Moreover, for colorectal tissues, comprehensive epigenomic data focusing on five core histone marks (H3K4me3, H3K4me1, H3K27me3, H3K9me3, and H3K36me3) were constructed by Roadmap Epigenomics ([https://egg2.wustl.edu/roadmap/web\\_portal/processed\\_data.html](https://egg2.wustl.edu/roadmap/web_portal/processed_data.html), (Kundaje et al., 2015)). From these data, overall 40 bed files (broad- and gappedPeaks) corresponding to E075 Colonic Mucosa (7 experiments); E076: Colon Smooth Muscle (7 experiments); and E106: Sigmoid Colon (6 experiments)) were also integrated to our dataset for comparison with U-DNA-Seq data. These files were originally aligned to the hg19 reference genome, therefore liftOver (<https://github.com/ucscGenomeBrowser/kent>) was applied to convert the coordinates to hg38 as follows.

```
$ liftOver NAME_of_DB_intervals.bed hg19ToHg38.over.chain  
NAME_ofDB_intervals_hg38.bed unMapped
```

# The file *hg19ToHg38.over.chain* can be downloaded from the UCSC  
(<http://hgdownload.soe.ucsc.edu/goldenPath/hg19/liftOver/hg19ToHg38.over.chain.gz>).

36 Finally, to address the published centromeric localization of uracil (Shu et al., 2018), ChIP-seq data on  
37 CENPA in HuRef cells were also downloaded (GSM1105684, bw file (Hayden et al., 2013)). Note that  
38 CENPA data are not available for HCT116 cells. In this study, reads were aligned to human reference  
39 genome hg19, and enrichment was given in bedgraph format containing only the alpha satellite  
40 segments. Following the paper (Hayden et al., 2013), those data bins were selected that showed at least  
41 two-fold enrichment, and then bed files were generated (using the same procedure that we used for  
42 derivation of region interval files from the log2 coverage tracks). Then liftOver was applied to convert  
43 hg19 coordinates to hg38 (GSM1105684\_2fold\_enriched\_merged\_hg38.bed). Data from the same  
44 experiment appear also in the Cistrome database (40153), where data were simply realigned to hg38  
45 reference genome, although the original paper reported much more careful procedure on mapping reads  
46 in the highly repetitive centromeres (Hayden et al., 2013). Other CENPA data in Cistrome database  
47 represent results on ectopically expressed CENPA, outside of the centromeres.

48

#### 49 **GIGGLE search with U-DNA-Seq regions in the established HCT116 related ChIP-seq dataset.**

50 After neglecting files that contain less than 400 intervals, overall, 576 bed files remained in the dataset.  
51 Because of the limitation of the applied GIGGLE search tool ((Layer et al., 2018) version 1.0, cf. issue  
52 #46 <https://github.com/ryanlayer/GIGGLE/issues/46>), top 100,000 intervals were selected from those  
53 interval (bed) files that contained more than 100,000 intervals (overall 50 bed files were cut in this way).

54 Then GIGGLE search was performed on this set of relevant and good quality data with all the U-DNA-  
55 Seq samples corresponding to HCT116 cells. A digestion of the results is shown in Figure 4A, while the  
56 whole set of the combo scores is provided in Supplementary file 3-table 1. The GIGGLE search was done  
57 as follows:

58 *# The database interval files as well as the query interval files have to be sorted and gzipped using a*  
59 *script belongs to the GIGGLE package using also bgzip tool that has to be installed in advance*  
60 *(<https://github.com/samtools/htslib/releases/>, [htslib-1.9.tar.bz2](#)).*

```
61 $ {PATH}/GIGGLE/scripts/sort_bed "{PATH}/*.bed" bed_sorted 4  
62 $ {PATH}/GIGGLE/scripts/sort_bed "{PATH}/*.region.bed" own_bed_sorted 4
```

63 *# Indexing the database*

```
64 $ GIGGLE index -i "bed_sorted/*gz" -o bed_sorted_b -f -s
```

65 *# Running GIGGLE search in this indexed library*

```
66 $ GIGGLE search -i bed_sorted_b -q
67 own_bed_sorted/NAME.filtered_blacklisted.bin100bp.smooth5k.RPGC.log2.0p2.region.bed.
68 gz -s > NAME.log2.0p2.regions.GIGGLE_results.csv
```

69 Note: In some cases, GIGGLE search might end in an error message “too many open files”. To solve this  
70 problem, a soft limit (-Sn) of the possible open files has to be checked and changed on the linux operating  
71 system (it is possible to do up to the hard limit (-Hn)).

72 *# Checking:*

```
73 $ ulimit -Sn
```

```
74 $ ulimit -Hn
```

75 *# Changing:*

```
76 $ ulimit -Sn 4096
```

77 ChIP-seq factors corresponding to the 10 best correlating hits for each U-DNA-Seq sample were  
78 selected. GIGGLE scores between all seven samples and all experiments corresponding to these factors  
79 were plotted excluding those, where data were found not informative (CNOT3, H2B, H3K27me1/2, SKP2,  
80 SIRT1, MCM2, and H4K20me1). All data are provided here in Supplementary file 3-table 1.

## Supplementary file 3-table 1. Combo scores from GIGGLE search on the full dataset.

| factor          | WT regions | NT_UGI regions | NT_UGI MMR regions | 5FdUR_UGI regions | 5FdUR_UGI MMR regions | RTX_UGI regions | RTX_UGI MMR regions | number of intervals | primary DB  | primary_DB ID                                                         |
|-----------------|------------|----------------|--------------------|-------------------|-----------------------|-----------------|---------------------|---------------------|-------------|-----------------------------------------------------------------------|
| histone markers |            |                |                    |                   |                       |                 |                     |                     |             |                                                                       |
| H2A             | -662.4     | -681.8         | -663.3             | 386.1             | 0.0                   | 338.6           | 6.8                 | 16198               | Cistrome    | 51143                                                                 |
| H2A             | -805.1     | -855.3         | -866.5             | 342.7             | -11.3                 | 316.8           | 0.0                 | 7396                | Cistrome    | 51159                                                                 |
| H2AFZ           | -411.8     | -422.5         | -414.6             | 443.7             | 105.7                 | 375.9           | 226.6               | 16633               | Cistrome    | 100929                                                                |
| H2AFZ           | -463.5     | -475.5         | -484.8             | 469.1             | 199.3                 | 341.5           | 201.6               | 12876               | Cistrome    | 100930                                                                |
| H2AFZ           | 151.7      | 162.2          | 150.9              | 407.3             | -5.2                  | 329.8           | 182.5               | 70941               | ENCODE      | ENCFF549VEQ.bed.gz                                                    |
| H2AZ            | -569.3     | -589.3         | -576.5             | 418.2             | 66.0                  | 423.6           | 150.1               | 56439               | Cistrome    | 84716                                                                 |
| H2AZ            | -523.2     | -541.9         | -534.2             | 414.8             | 82.3                  | 417.0           | 140.8               | 59933               | Cistrome    | 84715                                                                 |
| H2AZ            | -72.3      | -83.5          | -81.9              | 411.4             | 149.5                 | 352.1           | 143.2               | 100000              | Cistrome    | 83065                                                                 |
| H2AZ            | -735.2     | -819.4         | -799.8             | 460.5             | 81.2                  | 352.4           | 91.6                | 16374               | Cistrome    | 84720                                                                 |
| H2AZ            | -923.8     | -943.5         | -954.4             | 437.0             | 1.3                   | 318.1           | 2.5                 | 3440                | Cistrome    | 84719                                                                 |
| H2AZ            | -915.8     | -931.1         | -997.6             | 457.5             | 23.1                  | 322.7           | 17.8                | 9478                | Cistrome    | 84717                                                                 |
| H2AZ            | 3.4        | 5.0            | 2.3                | 374.7             | 143.8                 | 294.7           | 120.5               | 100000              | Cistrome    | 88446                                                                 |
| H2B             | -12.5      | -19.7          | -14.6              | 10.3              | 3.6                   | 1.9             | 0.0                 | 1007                | Cistrome    | 40190                                                                 |
| H2B             | 0.1        | 0.1            | 0.1                | 0.0               | 0.0                   | 0.0             | -10.0               | 571                 | Cistrome    | 40192                                                                 |
| H2Bub           | -37.1      | -38.9          | -40.3              | 85.0              | 3.0                   | 202.3           | 105.4               | 5475                | Cistrome    | 40191                                                                 |
| H3.3            | -557.8     | -572.0         | -578.4             | 278.7             | 0.0                   | 298.5           | 0.2                 | 12756               | Cistrome    | 77204                                                                 |
| H3.3            | -47.8      | -51.8          | -46.9              | 45.0              | 0.0                   | 14.4            | -0.2                | 1016                | Cistrome    | 74191                                                                 |
| H3K18ac         | -1057.4    | -1029.4        | -975.9             | 311.6             | -48.7                 | 346.7           | -0.1                | 15021               | Cistrome    | 81141                                                                 |
| H3K18ac         | -232.5     | -237.2         | -184.3             | 15.4              | -17.9                 | 49.7            | -0.3                | 673                 | Cistrome    | 84122                                                                 |
| H3K18cr         | -760.2     | -781.0         | -751.3             | 359.1             | -0.1                  | 372.9           | 6.6                 | 27293               | Cistrome    | 88253                                                                 |
| H3K18cr         | -1026.8    | -1007.8        | -944.9             | 307.7             | -50.4                 | 335.0           | -0.6                | 12848               | Cistrome    | 88250                                                                 |
| H3K18cr         | -1204.4    | -1189.0        | -1113.9            | 322.3             | -38.3                 | 319.3           | -1.3                | 6848                | Cistrome    | 88251                                                                 |
| H3K27ac         | -775.5     | -815.0         | -777.1             | 467.8             | 154.0                 | 587.3           | 309.7               | 100000              | Roadm. Epi. | E075-H3K27ac.narrowPeak.bed.gz                                        |
| H3K27ac         | -819.8     | -856.9         | -821.8             | 436.3             | 109.5                 | 575.0           | 314.2               | 100000              | Roadm. Epi. | E106-H3K27ac.narrowPeak.bed.gz                                        |
| H3K27ac         | -464.0     | -473.2         | -474.6             | 278.9             | -497.8                | 580.6           | 209.9               | 45508               | ENCODE      | ENCFF349LKU.bed.gz                                                    |
| H3K27ac         | -530.0     | -544.7         | -540.8             | 322.6             | -7.5                  | 528.8           | 129.8               | 40985               | ENCODE      | ENCFF083ADY.bed.gz                                                    |
| H3K27ac         | -470.1     | -474.3         | -465.8             | 364.6             | 164.5                 | 521.8           | 382.9               | 100000              | Roadm. Epi. | E075-H3K27ac.broadPeak.bed.gz                                         |
| H3K27ac         | -535.0     | -553.0         | -536.7             | 344.1             | 103.8                 | 515.9           | 374.6               | 100000              | Roadm. Epi. | E106-H3K27ac.broadPeak.bed.gz                                         |
| H3K27ac         | -558.2     | -583.1         | -551.4             | 370.5             | 109.7                 | 482.6           | 267.1               | 100000              | Roadm. Epi. | E076-H3K27ac.narrowPeak.bed.gz                                        |
| H3K27ac         | -610.4     | -615.6         | -617.6             | 361.7             | -3.9                  | 450.5           | 53.7                | 57085               | Cistrome    | 61965                                                                 |
| H3K27ac         | -569.6     | -570.2         | -576.5             | 281.1             | -4.3                  | 460.8           | 2.9                 | 14808               | Ensemble    | homo_sapiens.GRCh38.HCT116.H3K27ac.SWEmbl_R0005.peaks.20190329.bed.gz |
| H3K27ac         | -472.4     | -476.7         | -466.7             | 396.7             | 28.3                  | 450.1           | 135.8               | 67892               | Cistrome    | 66813                                                                 |
| H3K27ac         | -499.3     | -505.1         | -508.4             | 318.1             | -5.7                  | 437.3           | 89.2                | 50049               | Cistrome    | 66991                                                                 |
| H3K27ac         | -478.8     | -488.6         | -483.0             | 294.1             | -18.6                 | 429.3           | 116.2               | 36552               | Cistrome    | 101737                                                                |
| H3K27ac         | -564.6     | -564.2         | -566.8             | 362.4             | -0.2                  | 417.4           | 26.3                | 51101               | Cistrome    | 83014                                                                 |
| H3K27ac         | -546.5     | -553.0         | -560.2             | 315.4             | -12.8                 | 413.1           | 13.9                | 45759               | Cistrome    | 45272                                                                 |
| H3K27ac         | -447.0     | -450.7         | -453.9             | 310.0             | -3.5                  | 414.2           | 79.3                | 49495               | Cistrome    | 66992                                                                 |
| H3K27ac         | -480.1     | -486.5         | -484.5             | 306.6             | -8.3                  | 411.2           | 44.5                | 42374               | Cistrome    | 66993                                                                 |
| H3K27ac         | -450.7     | -454.2         | -449.9             | 299.3             | -2.5                  | 402.4           | 41.8                | 41740               | Cistrome    | 85866                                                                 |
| H3K27ac         | -291.8     | -295.5         | -283.0             | 267.8             | 120.1                 | 422.2           | 333.9               | 100000              | Roadm. Epi. | E076-H3K27ac.broadPeak.bed.gz                                         |
| H3K27ac         | -587.6     | -623.9         | -611.5             | 280.8             | -18.9                 | 392.1           | 3.4                 | 35902               | Cistrome    | 61942                                                                 |
| H3K27ac         | -558.1     | -557.6         | -573.1             | 256.2             | -82.1                 | 390.6           | 0.5                 | 22363               | Cistrome    | 101739                                                                |
| H3K27ac         | -496.9     | -504.2         | -503.8             | 326.4             | -0.8                  | 388.6           | 41.0                | 39573               | Cistrome    | 83018                                                                 |
| H3K27ac         | -661.2     | -667.2         | -675.9             | 298.8             | -25.9                 | 380.4           | 0.3                 | 36874               | Cistrome    | 62110                                                                 |
| H3K27ac         | -671.0     | -674.9         | -678.3             | 247.1             | -154.8                | 378.7           | -0.7                | 23506               | Cistrome    | 61940                                                                 |
| H3K27ac         | -631.7     | -641.3         | -636.2             | 289.7             | -22.6                 | 376.5           | 0.9                 | 35218               | Cistrome    | 62112                                                                 |
| H3K27ac         | -466.9     | -479.3         | -463.8             | 340.2             | 0.4                   | 384.7           | 57.8                | 45825               | Cistrome    | 85293                                                                 |
| H3K27ac         | -703.9     | -693.4         | -765.9             | 200.8             | -40.5                 | 379.0           | 2.1                 | 4400                | Cistrome    | 85867                                                                 |
| H3K27ac         | -558.9     | -532.3         | -571.3             | 240.3             | -108.6                | 379.2           | 0.0                 | 24442               | Cistrome    | 61939                                                                 |
| H3K27ac         | -689.6     | -695.2         | -694.2             | 300.6             | -40.1                 | 376.0           | 0.1                 | 32883               | Cistrome    | 62109                                                                 |
| H3K27ac         | -499.7     | -509.6         | -511.3             | 336.3             | 0.0                   | 380.7           | 33.4                | 38279               | Cistrome    | 85283                                                                 |
| H3K27ac         | -390.9     | -398.3         | -395.2             | 271.3             | -0.2                  | 379.8           | 62.6                | 44200               | Cistrome    | 82335                                                                 |
| H3K27ac         | -723.4     | -702.9         | -724.7             | 334.6             | -35.5                 | 367.6           | 0.0                 | 25172               | Cistrome    | 66757                                                                 |
| H3K27ac         | -753.2     | -747.0         | -756.8             | 254.0             | -132.7                | 365.2           | 0.0                 | 11136               | Cistrome    | 66393                                                                 |
| H3K27ac         | -600.3     | -582.4         | -599.3             | 265.1             | -100.1                | 365.2           | -0.4                | 20517               | Cistrome    | 42163                                                                 |
| H3K27ac         | -373.2     | -377.1         | -377.5             | 285.0             | 0.2                   | 372.4           | 105.9               | 50279               | Cistrome    | 82334                                                                 |
| H3K27ac         | -637.2     | -656.4         | -650.8             | 279.4             | -42.5                 | 363.4           | 0.0                 | 30630               | Cistrome    | 62111                                                                 |
| H3K27ac         | -530.6     | -536.9         | -529.0             | 343.6             | -0.5                  | 371.6           | 5.8                 | 5418                | Cistrome    | 51146                                                                 |
| H3K27ac         | -859.8     | -819.2         | -830.4             | 302.9             | -93.3                 | 359.8           | 0.0                 | 15455               | Cistrome    | 81343                                                                 |
| H3K27ac         | -660.4     | -652.0         | -667.9             | 297.5             | -75.9                 | 360.4           | 0.2                 | 16665               | Cistrome    | 81342                                                                 |
| H3K27ac         | -499.7     | -496.7         | -501.4             | 275.2             | -8.4                  | 365.7           | 3.4                 | 34708               | Cistrome    | 84767                                                                 |
| H3K27ac         | -438.4     | -434.9         | -441.3             | 266.0             | -1.1                  | 362.3           | 25.4                | 42466               | Cistrome    | 88909                                                                 |
| H3K27ac         | -542.9     | -531.0         | -560.3             | 300.4             | -33.4                 | 359.6           | 0.1                 | 22842               | Cistrome    | 81344                                                                 |
| H3K27ac         | -787.2     | -797.3         | -785.2             | 285.0             | -81.1                 | 356.7           | 0.0                 | 13243               | Cistrome    | 81345                                                                 |
| H3K27ac         | -592.3     | -577.3         | -610.2             | 269.1             | -93.4                 | 351.2           | 0.0                 | 21201               | Cistrome    | 66394                                                                 |
| H3K27ac         | -615.0     | -632.6         | -623.2             | 294.5             | -1.9                  | 359.9           | 3.3                 | 35090               | Cistrome    | 49529                                                                 |
| H3K27ac         | -756.6     | -740.3         | -727.8             | 251.8             | -47.8                 | 354.5           | 0.0                 | 7375                | Cistrome    | 84766                                                                 |
| H3K27ac         | -494.7     | -481.8         | -498.7             | 241.7             | -37.4                 | 351.2           | -1.1                | 24024               | Cistrome    | 61941                                                                 |
| H3K27ac         | -555.1     | -558.2         | -574.1             | 257.2             | -66.6                 | 345.0           | -0.1                | 21349               | Cistrome    | 66395                                                                 |
| H3K27ac         | -485.1     | -472.3         | -495.8             | 265.8             | -8.5                  | 354.3           | 16.0                | 16412               | Cistrome    | 83017                                                                 |
| H3K27ac         | -763.7     | -728.0         | -746.1             | 273.3             | -62.9                 | 349.3           | -0.1                | 12964               | Cistrome    | 81347                                                                 |
| H3K27ac         | -526.3     | -560.1         | -571.3             | 292.7             | -26.1                 | 346.5           | 2.5                 | 22907               | Cistrome    | 57096                                                                 |
| H3K27ac         | -499.5     | -511.5         | -502.3             | 277.3             | -2.9                  | 347.4           | 19.7                | 20922               | Cistrome    | 87277                                                                 |
| H3K27ac         | -510.7     | -504.5         | -508.6             | 296.6             | -0.2                  | 346.3           | 0.4                 | 33159               | Cistrome    | 42164                                                                 |

|          |         |         |         |       |        |        |        |        |             |                                                                                    |
|----------|---------|---------|---------|-------|--------|--------|--------|--------|-------------|------------------------------------------------------------------------------------|
| H3K27ac  | -570.8  | -566.9  | -566.4  | 274.4 | -3.0   | 351.0  | 15.5   | 12793  | Cistrome    | 87276                                                                              |
| H3K27ac  | -736.3  | -729.9  | -732.7  | 259.3 | -50.6  | 336.8  | -0.2   | 13255  | Cistrome    | 85454                                                                              |
| H3K27ac  | -624.3  | -621.5  | -624.8  | 260.6 | -31.7  | 335.7  | 0.0    | 13528  | Cistrome    | 81346                                                                              |
| H3K27ac  | -716.3  | -763.0  | -748.0  | 291.3 | -4.1   | 335.8  | 0.0    | 23025  | Cistrome    | 49530                                                                              |
| H3K27ac  | -494.1  | -501.5  | -499.7  | 278.0 | -6.0   | 336.6  | 0.5    | 25411  | Cistrome    | 85455                                                                              |
| H3K27ac  | -351.9  | -361.4  | -395.2  | 230.4 | -3.2   | 319.6  | 6.5    | 6904   | Cistrome    | 87275                                                                              |
| H3K27ac  | -611.2  | -621.6  | -615.8  | 258.6 | -3.9   | 282.1  | 1.9    | 7309   | Cistrome    | 87281                                                                              |
| H3K27ac  | -112.6  | -80.9   | -88.9   | -3.4  | -0.3   | -21.7  | -79.9  | 876    | Cistrome    | 67551                                                                              |
| H3K27me1 | 10.4    | 10.2    | 6.2     | -9.7  | -59.7  | 6.2    | 3.9    | 3757   | Cistrome    | 69463                                                                              |
| H3K27me1 | -3.3    | -10.7   | -6.2    | -2.4  | -10.7  | 0.1    | -0.3   | 431    | Cistrome    | 69460                                                                              |
| H3K27me1 | -2.6    | -1.2    | -4.3    | -1.9  | -13.9  | 0.0    | -0.2   | 574    | Cistrome    | 69466                                                                              |
| H3K27me2 | 3.0     | 1.5     | 1.2     | -0.1  | -0.1   | 0.0    | 0.0    | 1246   | Cistrome    | 69459                                                                              |
| H3K27me3 | -779.3  | -818.1  | -799.5  | 730.4 | 116.1  | 484.4  | 267.5  | 100000 | Roadm. Epi. | E075-H3K27me3.narrowPeak.bed.gz                                                    |
| H3K27me3 | -580.5  | -607.8  | -590.1  | 507.2 | 106.9  | 313.7  | 199.6  | 65497  | Roadm. Epi. | E076-H3K27me3.narrowPeak.bed.gz                                                    |
| H3K27me3 | -395.1  | -452.7  | -388.1  | 57.1  | -0.1   | 227.7  | 12.2   | 2705   | Cistrome    | 51162                                                                              |
| H3K27me3 | -405.3  | -410.2  | -403.1  | 367.6 | 135.1  | 272.8  | 218.2  | 100000 | Roadm. Epi. | E075-H3K27me3.broadPeak.bed.gz                                                     |
| H3K27me3 | -485.6  | -509.7  | -497.8  | 469.0 | 3.9    | 229.6  | 171.9  | 100000 | Roadm. Epi. | E106-H3K27me3.narrowPeak.bed.gz                                                    |
| H3K27me3 | -281.1  | -293.5  | -283.9  | 281.0 | 115.3  | 174.7  | 148.8  | 100000 | Roadm. Epi. | E076-H3K27me3.broadPeak.bed.gz                                                     |
| H3K27me3 | -232.9  | -234.8  | -231.7  | 194.5 | 11.0   | 66.9   | 96.5   | 100000 | Roadm. Epi. | E106-H3K27me3.broadPeak.bed.gz                                                     |
| H3K27me3 | -65.5   | -57.5   | -64.2   | 42.5  | 0.3    | 30.4   | 1.6    | 699    | Cistrome    | 51147                                                                              |
| H3K27me3 | -159.1  | -155.8  | -154.0  | 103.1 | ND     | -168.7 | -76.1  | 199001 | Ensemble    | homo_sapiens.GRCh38.HCT116.H3K27me3.ccat_histone.peaks.20190329.mergedd1000.bed.gz |
| H3K27me3 | -279.5  | -289.5  | -281.1  | -31.4 | 104.2  | -341.4 | -244.9 | 100000 | ENCODE      | ENCF806AYM.bed.gz                                                                  |
| H3K36me3 | -499.5  | -519.2  | -502.5  | 208.7 | 105.8  | 837.8  | 634.1  | 100000 | Roadm. Epi. | E075-H3K36me3.narrowPeak.bed.gz                                                    |
| H3K36me3 | -397.7  | -414.4  | -409.2  | 97.1  | -23.5  | 771.3  | 645.1  | 100000 | Roadm. Epi. | E106-H3K36me3.narrowPeak.bed.gz                                                    |
| H3K36me3 | -329.0  | -341.3  | -339.2  | 122.7 | 6.3    | 740.9  | 615.4  | 100000 | Roadm. Epi. | E076-H3K36me3.narrowPeak.bed.gz                                                    |
| H3K36me3 | -261.3  | -269.3  | -272.3  | 48.6  | 8.7    | 717.1  | 599.4  | 72341  | ENCODE      | ENCF029GGD.bed.gz                                                                  |
| H3K36me3 | -186.6  | -188.5  | -190.7  | 44.8  | -164.0 | 530.2  | 502.2  | 43916  | Ensemble    | homo_sapiens.GRCh38.HCT116.H3K36me3.ccat_histone.peaks.20190329.mergedd1000.bed.gz |
| H3K36me3 | -202.0  | -207.3  | -206.0  | 182.7 | 32.8   | 491.3  | 419.9  | 100000 | Roadm. Epi. | E076-H3K36me3.broadPeak.bed.gz                                                     |
| H3K36me3 | -246.2  | -251.3  | -250.5  | 191.1 | 106.7  | 492.8  | 416.4  | 100000 | Roadm. Epi. | E075-H3K36me3.broadPeak.bed.gz                                                     |
| H3K36me3 | -194.0  | -198.7  | -203.2  | 77.7  | -0.3   | 462.1  | 439.6  | 100000 | Roadm. Epi. | E106-H3K36me3.broadPeak.bed.gz                                                     |
| H3K36me3 | -35.1   | -44.2   | -37.0   | 2.7   | -22.3  | 137.8  | 32.1   | 563    | Cistrome    | 51149, 51164                                                                       |
| H3K4me1  | -1067.6 | -1119.8 | -1058.1 | 573.3 | 28.6   | 718.4  | 331.8  | 100000 | Roadm. Epi. | E075-H3K4me1.narrowPeak.bed.gz                                                     |
| H3K4me1  | -457.7  | -477.3  | -463.7  | 438.2 | ND     | 712.2  | 290.8  | 100000 | ENCODE      | ENCF986BGX.bed.gz                                                                  |
| H3K4me1  | -446.2  | -456.4  | -449.3  | 331.5 | 6.7    | 629.8  | 185.5  | 99735  | Ensemble    | homo_sapiens.GRCh38.HCT116.H3K4me1.ccat_histone.peaks.20190329.bed.gz              |
| H3K4me1  | -418.0  | -426.3  | -419.4  | 445.5 | 90.2   | 590.5  | 246.2  | 100000 | Cistrome    | 83177                                                                              |
| H3K4me1  | -588.2  | -613.8  | -602.6  | 442.3 | 119.9  | 578.7  | 263.2  | 100000 | Cistrome    | 70068                                                                              |
| H3K4me1  | -442.6  | -463.1  | -448.4  | 333.8 | ND     | 575.7  | 186.6  | 82838  | ENCODE      | ENCF963BLP.bed.gz                                                                  |
| H3K4me1  | -421.0  | -435.7  | -421.1  | 417.8 | 93.7   | 553.9  | 232.9  | 100000 | Cistrome    | 101556                                                                             |
| H3K4me1  | -458.5  | -479.1  | -464.4  | 401.2 | 52.5   | 550.3  | 180.5  | 97772  | Cistrome    | 74630                                                                              |
| H3K4me1  | -399.7  | -412.6  | -399.4  | 431.8 | 98.8   | 553.2  | 229.9  | 100000 | Cistrome    | 85458                                                                              |
| H3K4me1  | -494.2  | -504.1  | -493.0  | 470.2 | 133.6  | 543.8  | 214.4  | 97947  | Cistrome    | 51161                                                                              |
| H3K4me1  | -597.6  | -621.3  | -608.2  | 433.2 | 81.0   | 538.4  | 210.0  | 87601  | Cistrome    | 82750                                                                              |
| H3K4me1  | -543.4  | -548.6  | -531.4  | 428.5 | 62.2   | 571.1  | 416.8  | 100000 | Roadm. Epi. | E075-H3K4me1.broadPeak.bed.gz                                                      |
| H3K4me1  | -464.1  | -479.0  | -465.9  | 424.4 | 105.6  | 519.2  | 207.0  | 100000 | Cistrome    | 82751                                                                              |
| H3K4me1  | -445.5  | -467.6  | -448.5  | 428.7 | 116.3  | 514.0  | 226.9  | 100000 | Cistrome    | 82748                                                                              |
| H3K4me1  | -570.0  | -600.9  | -591.1  | 430.1 | 116.9  | 525.1  | 238.6  | 86089  | Cistrome    | 70076                                                                              |
| H3K4me1  | -611.9  | -639.4  | -621.0  | 353.5 | -202.5 | 516.5  | 306.0  | 100000 | Roadm. Epi. | E106-H3K4me1.narrowPeak.bed.gz                                                     |
| H3K4me1  | -451.4  | -468.9  | -458.9  | 414.6 | 99.4   | 518.3  | 230.8  | 88273  | Cistrome    | 70075                                                                              |
| H3K4me1  | -449.8  | -467.4  | -453.4  | 393.0 | 91.8   | 504.4  | 219.6  | 91410  | Cistrome    | 70067                                                                              |
| H3K4me1  | -360.2  | -371.4  | -360.5  | 400.7 | 110.6  | 496.1  | 215.9  | 100000 | Cistrome    | 88015                                                                              |
| H3K4me1  | -344.7  | -358.5  | -349.1  | 403.3 | 112.5  | 488.6  | 226.5  | 100000 | Cistrome    | 88811                                                                              |
| H3K4me1  | -465.9  | -485.4  | -474.6  | 383.7 | 66.7   | 494.5  | 196.1  | 78930  | Cistrome    | 9246                                                                               |
| H3K4me1  | -432.9  | -448.9  | -433.6  | 321.2 | 0.0    | 485.1  | 337.1  | 100000 | Roadm. Epi. | E106-H3K4me1.broadPeak.bed.gz                                                      |
| H3K4me1  | -409.1  | -418.8  | -415.9  | 389.0 | 103.8  | 476.7  | 198.3  | 86738  | Cistrome    | 84634                                                                              |
| H3K4me1  | -334.8  | -367.7  | -356.6  | 270.2 | -0.9   | 482.3  | 257.1  | 79205  | Cistrome    | 57095                                                                              |
| H3K4me1  | -557.7  | -576.3  | -565.6  | 454.8 | 123.9  | 474.9  | 194.3  | 48818  | Cistrome    | 51145                                                                              |
| H3K4me1  | -917.8  | -919.0  | -902.7  | 467.5 | 63.2   | 442.3  | 145.3  | 37547  | Cistrome    | 42909                                                                              |
| H3K4me1  | -509.3  | -516.7  | -516.5  | 365.3 | 64.8   | 435.0  | 194.6  | 41288  | Cistrome    | 101557                                                                             |
| H3K4me1  | -673.3  | -714.7  | -691.2  | 431.7 | 164.2  | 422.8  | 199.3  | 29827  | Cistrome    | 42908                                                                              |
| H3K4me1  | -351.9  | -335.7  | -334.3  | 395.7 | 20.0   | 418.6  | 74.0   | 4238   | Cistrome    | 72104                                                                              |
| H3K4me1  | -407.6  | -423.6  | -398.3  | 268.8 | 6.5    | 391.8  | 256.3  | 100000 | Roadm. Epi. | E076-H3K4me1.narrowPeak.bed.gz                                                     |
| H3K4me1  | -464.4  | -526.0  | -466.0  | 398.3 | 26.3   | 406.6  | 90.0   | 4839   | Cistrome    | 72106                                                                              |
| H3K4me1  | -469.0  | -485.7  | -486.5  | 370.5 | 112.4  | 402.0  | 172.6  | 47917  | Cistrome    | 88979                                                                              |
| H3K4me1  | -622.3  | -647.3  | -643.1  | 403.7 | 1.7    | 380.1  | 76.2   | 35174  | Cistrome    | 86455                                                                              |
| H3K4me1  | -264.0  | -271.0  | -255.9  | 270.3 | 65.7   | 375.7  | 276.4  | 100000 | Roadm. Epi. | E076-H3K4me1.broadPeak.bed.gz                                                      |
| H3K4me1  | -282.1  | -291.7  | -287.3  | 265.9 | 12.0   | 350.0  | 174.3  | 34853  | Cistrome    | 101558                                                                             |
| H3K4me1  | -31.1   | -45.8   | -36.4   | 87.4  | 3.5    | 86.6   | 11.1   | 567    | Cistrome    | 84587                                                                              |
| H3K4me1  | -63.1   | -55.1   | -53.3   | 16.5  | -0.3   | 54.3   | 2.3    | 422    | Cistrome    | 45270                                                                              |
| H3K4me2  | -449.7  | -459.2  | -447.7  | 403.0 | 59.0   | 536.0  | 229.9  | 69442  | ENCODE      | ENCF915XUY.bed.gz                                                                  |
| H3K4me2  | -417.2  | -426.3  | -414.3  | 389.9 | 78.8   | 464.5  | 192.3  | 79557  | Cistrome    | 101374                                                                             |
| H3K4me2  | -784.9  | -809.3  | -813.7  | 396.2 | 0.2    | 459.7  | 135.5  | 45297  | Cistrome    | 82749                                                                              |
| H3K4me2  | -478.0  | -484.2  | -481.4  | 380.5 | 39.4   | 423.2  | 139.1  | 62083  | Cistrome    | 101375                                                                             |
| H3K4me2  | -913.1  | -928.0  | -906.4  | 427.5 | 0.2    | 417.0  | 73.6   | 40745  | Cistrome    | 42911                                                                              |
| H3K4me2  | -461.0  | -462.9  | -452.1  | 400.8 | 31.5   | 411.7  | 113.3  | 64397  | Cistrome    | 42910                                                                              |
| H3K4me2  | -530.7  | -539.2  | -534.8  | 364.8 | 1.2    | 408.0  | 104.6  | 52922  | Cistrome    | 70073                                                                              |
| H3K4me2  | -462.1  | -469.6  | -456.4  | 370.4 | 89.9   | 404.8  | 143.1  | 69348  | Cistrome    | 83378                                                                              |
| H3K4me2  | -792.5  | -820.5  | -810.3  | 345.9 | -0.6   | 401.4  | 47.7   | 39615  | Cistrome    | 70066                                                                              |
| H3K4me2  | -640.8  | -652.7  | -653.6  | 361.4 | 0.0    | 396.1  | 35.9   | 47492  | Cistrome    | 83353                                                                              |
| H3K4me2  | -638.5  | -667.8  | -645.6  | 367.7 | 0.0    | 393.7  | 35.4   | 42419  | Cistrome    | 70074                                                                              |
| H3K4me2  | -634.2  | -650.1  | -647.1  | 338.4 | -0.2   | 387.1  | 41.1   | 40335  | Cistrome    | 70065                                                                              |

|          |         |         |         |       |        |       |       |        |             |                                                                       |
|----------|---------|---------|---------|-------|--------|-------|-------|--------|-------------|-----------------------------------------------------------------------|
| H3K4me2  | -866.8  | -880.0  | -845.2  | 395.5 | -0.2   | 375.0 | 11.5  | 23301  | Cistrome    | 83307                                                                 |
| H3K4me2  | -955.8  | -968.7  | -952.1  | 384.0 | -3.6   | 368.5 | 1.7   | 29310  | Cistrome    | 70079                                                                 |
| H3K4me2  | -897.0  | -929.1  | -926.1  | 405.9 | 0.0    | 365.7 | 7.5   | 17134  | Cistrome    | 88737                                                                 |
| H3K4me2  | -1277.3 | -1242.0 | -1202.8 | 355.7 | -41.5  | 357.1 | 0.0   | 21206  | Cistrome    | 70081                                                                 |
| H3K4me2  | -1708.3 | -1711.7 | -1707.6 | 452.3 | -0.1   | 329.8 | -1.9  | 7869   | Cistrome    | 83376                                                                 |
| H3K4me3  | -762.4  | -792.4  | -772.3  | 481.1 | 111.7  | 509.2 | 212.2 | 84678  | Roadm. Epi. | E075-H3K4me3.narrowPeak.bed.gz                                        |
| H3K4me3  | -607.3  | -628.3  | -618.9  | 384.9 | 159.6  | 437.0 | 96.8  | 31924  | ENCODE      | ENCF023MGT.bed.gz                                                     |
| H3K4me3  | -861.7  | -900.1  | -870.1  | 406.5 | 335.5  | 422.7 | 15.7  | 26743  | ENCODE      | ENCF575AUU.bed.gz                                                     |
| H3K4me3  | -454.8  | -463.1  | -452.9  | 368.7 | 98.7   | 443.1 | 275.1 | 100000 | Roadm. Epi. | E075-H3K4me3.broadPeak.bed.gz                                         |
| H3K4me3  | -1000.1 | -1107.1 | -1034.0 | 392.5 | ND     | 403.8 | 17.1  | 17658  | Ensemble    | homo_sapiens.GRCh38.HCT116.H3K4me3.SWEmbl_R0005.peaks.20190329.bed.gz |
| H3K4me3  | -929.4  | -946.7  | -898.2  | 396.7 | -1.5   | 384.1 | 10.8  | 26517  | Cistrome    | 51144                                                                 |
| H3K4me3  | -793.3  | -813.5  | -794.2  | 397.4 | -0.8   | 379.9 | 2.7   | 34446  | Cistrome    | 45271                                                                 |
| H3K4me3  | -877.5  | -892.1  | -887.4  | 391.2 | 3.3    | 372.2 | 2.2   | 31205  | Cistrome    | 92369                                                                 |
| H3K4me3  | -476.9  | -485.1  | -476.9  | 365.1 | 5.2    | 373.8 | 62.2  | 48602  | Cistrome    | 85292                                                                 |
| H3K4me3  | -663.8  | -686.3  | -672.7  | 378.1 | 0.2    | 377.2 | 18.0  | 33338  | Cistrome    | 102153                                                                |
| H3K4me3  | -854.8  | -831.0  | -816.8  | 381.7 | -4.3   | 369.9 | 1.8   | 29334  | Cistrome    | 42912                                                                 |
| H3K4me3  | -590.4  | -600.5  | -596.3  | 361.0 | 0.0    | 374.5 | 28.0  | 31737  | Cistrome    | 102154                                                                |
| H3K4me3  | -890.3  | -906.2  | -871.3  | 397.2 | -4.8   | 366.7 | 0.8   | 30486  | Cistrome    | 42161                                                                 |
| H3K4me3  | -951.8  | -974.8  | -943.6  | 390.3 | -5.8   | 368.9 | 0.7   | 28373  | Cistrome    | 89284                                                                 |
| H3K4me3  | -876.5  | -903.5  | -866.9  | 387.6 | -1.5   | 367.9 | 2.3   | 29898  | Cistrome    | 92368                                                                 |
| H3K4me3  | -976.1  | -997.0  | -973.7  | 386.6 | -5.8   | 368.1 | 0.8   | 27614  | Cistrome    | 89285                                                                 |
| H3K4me3  | -1105.8 | -1139.3 | -1089.0 | 386.2 | -8.6   | 367.7 | 0.7   | 25156  | Cistrome    | 42913                                                                 |
| H3K4me3  | -841.8  | -868.2  | -848.7  | 391.8 | -1.1   | 371.5 | 3.0   | 26578  | Cistrome    | 81264                                                                 |
| H3K4me3  | -966.0  | -1123.7 | -1388.2 | 246.6 | -17.3  | 370.4 | 7.4   | 2983   | Cistrome    | 81266                                                                 |
| H3K4me3  | -840.6  | -854.4  | -827.1  | 378.9 | -3.2   | 366.2 | 3.4   | 24080  | Cistrome    | 88713                                                                 |
| H3K4me3  | -1124.9 | -1201.8 | -1134.9 | 376.7 | -10.9  | 362.6 | 2.2   | 19739  | Cistrome    | 88725                                                                 |
| H3K4me3  | -1027.5 | -1086.1 | -1039.8 | 378.2 | -8.5   | 358.3 | 2.6   | 20453  | Cistrome    | 88698                                                                 |
| H3K4me3  | -987.5  | -1024.7 | -989.7  | 388.2 | -10.2  | 352.6 | 0.1   | 27726  | Cistrome    | 42160                                                                 |
| H3K4me3  | -1004.3 | -1066.4 | -1018.9 | 397.1 | -5.0   | 353.8 | 0.2   | 27346  | Cistrome    | 81633                                                                 |
| H3K4me3  | -611.6  | -640.5  | -656.2  | 385.6 | 2.9    | 368.8 | 50.7  | 39820  | Cistrome    | 51160                                                                 |
| H3K4me3  | -998.4  | -1042.3 | -1009.5 | 396.8 | -7.0   | 351.1 | 0.2   | 26055  | Cistrome    | 56017                                                                 |
| H3K4me3  | -1169.5 | -1234.0 | -1236.0 | 391.8 | -6.4   | 353.4 | 0.1   | 22478  | Cistrome    | 57094                                                                 |
| H3K4me3  | -1059.0 | -1076.0 | -1081.2 | 391.5 | -4.5   | 353.9 | 0.1   | 25236  | Cistrome    | 81265                                                                 |
| H3K4me3  | -1014.3 | -1060.9 | -1033.0 | 415.8 | 0.8    | 360.4 | 15.8  | 27993  | Cistrome    | 42162                                                                 |
| H3K4me3  | -959.6  | -1009.1 | -958.0  | 388.8 | -7.8   | 350.7 | 0.4   | 25988  | Cistrome    | 56016                                                                 |
| H3K4me3  | -768.8  | -779.9  | -771.1  | 374.0 | -3.3   | 352.9 | 3.5   | 22224  | Cistrome    | 88697                                                                 |
| H3K4me3  | -1188.4 | -1247.6 | -1184.9 | 334.9 | -43.4  | 350.5 | 0.4   | 16524  | Cistrome    | 70064                                                                 |
| H3K4me3  | -1053.6 | -1081.8 | -1083.2 | 392.2 | -7.3   | 343.0 | 0.0   | 24912  | Cistrome    | 81625                                                                 |
| H3K4me3  | -876.9  | -915.9  | -893.6  | 398.2 | -1.1   | 345.6 | 0.3   | 25654  | Cistrome    | 56019                                                                 |
| H3K4me3  | -1073.8 | -1174.4 | -1082.7 | 357.5 | -18.9  | 347.5 | 0.5   | 18426  | Cistrome    | 70071                                                                 |
| H3K4me3  | -1174.0 | -1239.4 | -1157.5 | 334.2 | -40.8  | 341.3 | 0.2   | 16204  | Cistrome    | 70063                                                                 |
| H3K4me3  | -1078.5 | -1140.5 | -1079.7 | 366.0 | -18.6  | 344.8 | 0.2   | 17739  | Cistrome    | 85447                                                                 |
| H3K4me3  | -1054.1 | -1148.6 | -1046.3 | 376.7 | -15.6  | 344.9 | 0.3   | 19186  | Cistrome    | 85451                                                                 |
| H3K4me3  | -907.4  | -889.7  | -859.0  | 327.6 | -80.5  | 336.0 | 1.9   | 19549  | Cistrome    | 38319                                                                 |
| H3K4me3  | -907.4  | -889.7  | -859.0  | 327.6 | -80.5  | 336.0 | 1.9   | 19549  | Cistrome    | 8440                                                                  |
| H3K4me3  | -1176.4 | -1234.7 | -1155.6 | 363.8 | -21.5  | 338.6 | 0.3   | 19113  | Cistrome    | 81635                                                                 |
| H3K4me3  | -1143.4 | -1180.0 | -1129.9 | 355.2 | -19.3  | 342.4 | 0.2   | 19410  | Cistrome    | 70072                                                                 |
| H3K4me3  | -1176.5 | -1219.3 | -1136.7 | 357.4 | -26.2  | 341.9 | 0.2   | 16561  | Cistrome    | 85449                                                                 |
| H3K4me3  | -530.8  | -546.0  | -530.1  | 359.6 | 138.8  | 356.5 | 168.1 | 72243  | Roadm. Epi. | E076-H3K4me3.narrowPeak.bed.gz                                        |
| H3K4me3  | -1234.7 | -1254.3 | -1188.5 | 340.7 | -56.7  | 333.2 | 0.0   | 18978  | Cistrome    | 72103                                                                 |
| H3K4me3  | -1248.3 | -1268.7 | -1274.5 | 346.3 | -38.3  | 336.6 | 0.1   | 15522  | Cistrome    | 85446                                                                 |
| H3K4me3  | -1196.1 | -1226.9 | -1185.6 | 350.6 | -31.0  | 334.5 | 0.0   | 16408  | Cistrome    | 85452                                                                 |
| H3K4me3  | -1137.1 | -1223.9 | -1128.2 | 361.2 | -24.3  | 334.6 | 0.0   | 17932  | Cistrome    | 85453                                                                 |
| H3K4me3  | -1053.0 | -1067.9 | -1035.8 | 335.9 | -55.9  | 329.0 | 0.0   | 15627  | Cistrome    | 72105                                                                 |
| H3K4me3  | -1229.8 | -1222.5 | -1201.3 | 342.0 | -39.5  | 333.5 | 0.1   | 15943  | Cistrome    | 85448                                                                 |
| H3K4me3  | -1249.0 | -1267.8 | -1236.7 | 354.5 | -29.1  | 332.3 | 0.0   | 16383  | Cistrome    | 85450                                                                 |
| H3K4me3  | -975.9  | -1000.3 | -946.7  | 379.7 | -9.0   | 324.4 | 0.0   | 23519  | Cistrome    | 56018                                                                 |
| H3K4me3  | -863.5  | -860.9  | -853.8  | 346.1 | -12.6  | 322.3 | 2.1   | 21480  | Cistrome    | 38321                                                                 |
| H3K4me3  | -660.4  | -688.0  | -693.7  | 317.2 | -28.8  | 317.4 | 2.5   | 17967  | Cistrome    | 49532                                                                 |
| H3K4me3  | -409.0  | -425.8  | -411.3  | 245.4 | 172.5  | 280.3 | 114.7 | 68861  | Roadm. Epi. | E106-H3K4me3.narrowPeak.bed.gz                                        |
| H3K4me3  | -271.5  | -277.3  | -267.1  | 237.3 | 130.6  | 285.9 | 201.1 | 100000 | Roadm. Epi. | E076-H3K4me3.broadPeak.bed.gz                                         |
| H3K4me3  | -147.2  | -149.2  | -142.5  | 132.5 | 1.1    | 223.6 | 151.2 | 100000 | Roadm. Epi. | E106-H3K4me3.broadPeak.bed.gz                                         |
| H3K79me2 | -852.1  | -903.2  | -890.3  | 259.1 | -155.6 | 440.9 | 137.8 | 10541  | Cistrome    | 101708                                                                |
| H3K79me2 | -630.1  | -700.2  | -644.3  | 225.8 | -144.0 | 418.7 | 214.8 | 8655   | Cistrome    | 101707                                                                |
| H3K79me2 | -46.9   | -45.9   | -45.3   | 25.2  | -19.3  | 245.6 | 6.6   | 2368   | Cistrome    | 83603                                                                 |
| H3K79me2 | 0.0     | 0.0     | -0.1    | 160.0 | 1.9    | 195.0 | 40.0  | 20855  | Cistrome    | 88455                                                                 |
| H3K9ac   | -781.0  | -791.5  | -785.6  | 539.8 | 330.6  | 674.8 | 282.0 | 100000 | Roadm. Epi. | E075-H3K9ac.narrowPeak.bed.gz                                         |
| H3K9ac   | -416.4  | -424.9  | -422.6  | 372.4 | 270.2  | 540.1 | 360.8 | 100000 | Roadm. Epi. | E075-H3K9ac.broadPeak.bed.gz                                          |
| H3K9ac   | -596.9  | -613.3  | -604.6  | 349.0 | 157.9  | 510.0 | 125.0 | 36097  | ENCODE      | ENCF724XS.bed.gz                                                      |
| H3K9ac   | -546.1  | -544.9  | -553.2  | 367.3 | -0.6   | 417.9 | 25.9  | 49287  | Cistrome    | 87280                                                                 |
| H3K9ac   | -501.4  | -516.8  | -492.6  | 349.9 | 363.8  | 426.2 | 227.4 | 60918  | Roadm. Epi. | E076-H3K9ac.narrowPeak.bed.gz                                         |
| H3K9ac   | -722.5  | -733.0  | -726.1  | 353.8 | -11.2  | 408.8 | 14.9  | 32466  | Cistrome    | 100642                                                                |
| H3K9ac   | -566.9  | -567.6  | -580.4  | 362.4 | -1.7   | 393.6 | 12.7  | 44150  | Cistrome    | 87279                                                                 |
| H3K9ac   | -687.9  | -687.5  | -697.4  | 334.2 | -22.4  | 392.5 | 4.2   | 29925  | Cistrome    | 100641                                                                |
| H3K9ac   | -515.3  | -520.4  | -522.5  | 356.6 | 0.0    | 391.3 | 52.2  | 40603  | Cistrome    | 87278                                                                 |
| H3K9ac   | -568.7  | -581.4  | -577.8  | 369.2 | 0.2    | 376.7 | 42.0  | 40039  | Cistrome    | 87273                                                                 |
| H3K9ac   | -510.3  | -511.1  | -523.4  | 328.9 | 0.1    | 337.4 | 41.2  | 24383  | Cistrome    | 82746                                                                 |
| H3K9ac   | -535.5  | -529.2  | -539.2  | 313.0 | 0.0    | 335.6 | 37.2  | 18541  | Cistrome    | 87272                                                                 |
| H3K9ac   | -156.2  | -152.2  | -148.1  | 199.1 | 219.4  | 354.7 | 285.3 | 100000 | Roadm. Epi. | E076-H3K9ac.broadPeak.bed.gz                                          |
| H3K9ac   | -621.7  | -643.6  | -623.8  | 315.6 | -0.5   | 318.0 | 13.2  | 20226  | Cistrome    | 82747                                                                 |
| H3K9ac   | -835.8  | -857.0  | -847.6  | 337.7 | -0.8   | 298.0 | 3.0   | 13135  | Cistrome    | 82745                                                                 |

|                                             |         |         |         |        |         |        |        |        |             |                                                                                       |
|---------------------------------------------|---------|---------|---------|--------|---------|--------|--------|--------|-------------|---------------------------------------------------------------------------------------|
| H3K9ac                                      | -649.1  | -677.5  | -657.7  | 278.0  | -1.3    | 284.8  | 5.1    | 5854   | Cistrome    | 82744                                                                                 |
| H3K9me2                                     | -646.1  | -707.2  | -690.4  | 522.2  | 273.2   | 332.6  | 211.9  | 16338  | Cistrome    | 85108                                                                                 |
| H3K9me2                                     | -0.6    | -0.3    | -0.2    | 0.6    | 7.5     | 0.0    | 0.0    | 1493   | Cistrome    | 54504                                                                                 |
| H3K9me2                                     | 290.7   | 334.9   | 323.0   | -1.0   | -10.9   | -3.7   | 0.0    | 4735   | ENCODE      | ENCF045ELD.bed.gz                                                                     |
| H3K9me2                                     | -107.3  | -96.9   | -66.4   | -97.4  | -46.4   | -132.3 | -142.8 | 612    | Cistrome    | 93700                                                                                 |
| H3K9me2                                     | -109.6  | -84.8   | -68.2   | -108.3 | -50.6   | -200.0 | -215.5 | 726    | Cistrome    | 93701                                                                                 |
| H3K9me3                                     | -11.0   | -14.9   | -7.6    | -43.1  | -27.2   | -25.0  | -38.8  | 471    | Cistrome    | 51148                                                                                 |
| H3K9me3                                     | -32.1   | -26.8   | -25.2   | -57.7  | -34.5   | -55.6  | -119.5 | 715    | Cistrome    | 51163                                                                                 |
| H3K9me3                                     | -17.1   | -14.8   | -15.1   | 4.5    | -10.4   | -45.7  | -63.0  | 100000 | Roadm. Epi. | E075-H3K9me3.broadPeak.bed.gz                                                         |
| H3K9me3                                     | 2.2     | 8.5     | 1.9     | -0.3   | -93.2   | -103.1 | -83.7  | 100000 | Roadm. Epi. | E076-H3K9me3.broadPeak.bed.gz                                                         |
| H3K9me3                                     | -50.2   | -20.6   | -42.4   | -17.9  | -113.2  | -122.4 | -56.0  | 64003  | Roadm. Epi. | E076-H3K9me3.narrowPeak.bed.gz                                                        |
| H3K9me3                                     | -169.0  | -180.4  | -180.1  | -4.8   | -81.8   | -185.6 | -162.8 | 100000 | Roadm. Epi. | E075-H3K9me3.narrowPeak.bed.gz                                                        |
| H3K9me3                                     | 85.2    | 95.0    | 87.0    | -146.1 | -63.4   | -248.3 | -204.0 | 100000 | Roadm. Epi. | E106-H3K9me3.broadPeak.bed.gz                                                         |
| H3K9me3                                     | -31.2   | -38.6   | -44.6   | -233.9 | 0.0     | -329.2 | -245.5 | 100000 | Roadm. Epi. | E106-H3K9me3.narrowPeak.bed.gz                                                        |
| H3K9me3                                     | 198.1   | 208.8   | 199.8   | -407.1 | ND      | -420.4 | -383.1 | 116955 | Ensemble    | homo_sapiens.GRCh38.HCT116.H3K9me3.ccat_hist<br>one.peaks.20190329.mergedd1000.bed.gz |
| H3K9me3                                     | 312.5   | 327.6   | 329.7   | -664.1 | 121.0   | -645.0 | -611.4 | 100000 | ENCODE      | ENCF580MMU.bed.gz                                                                     |
| H4K16ac                                     | -595.3  | -607.4  | -624.7  | 457.0  | 48.4    | 503.2  | 390.2  | 2290   | Cistrome    | 83887                                                                                 |
| H4K16ac                                     | -842.0  | -847.7  | -899.3  | 383.7  | 0.4     | 382.0  | 62.8   | 25148  | Cistrome    | 83526                                                                                 |
| H4K20me1                                    | -27.0   | -34.5   | -37.7   | 0.0    | -1933.6 | 481.4  | 425.1  | 20508  | ENCODE      | ENCF937WLG.bed.gz                                                                     |
| H4K20me3                                    | -219.9  | -227.2  | -223.6  | 237.6  | 6.3     | 222.4  | 66.1   | 39942  | Cistrome    | 88457                                                                                 |
| <b>polymerase II - active transcription</b> |         |         |         |        |         |        |        |        |             |                                                                                       |
| POLR2A                                      | -809.5  | -684.6  | -670.6  | 143.4  | -53.5   | 568.1  | 155.3  | 3029   | Cistrome    | 82412                                                                                 |
| POLR2A                                      | -515.1  | -535.9  | -534.7  | 276.6  | -27.5   | 507.2  | 306.1  | 66413  | Cistrome    | 34398                                                                                 |
| POLR2A                                      | -760.5  | -775.3  | -763.7  | 389.4  | -1.7    | 463.8  | 147.1  | 31718  | Cistrome    | 82333                                                                                 |
| POLR2A                                      | -542.0  | -549.1  | -543.1  | 392.0  | 14.6    | 452.9  | 166.0  | 55528  | Cistrome    | 46201                                                                                 |
| POLR2A                                      | -951.7  | -857.4  | -767.0  | 94.8   | -123.0  | 469.0  | 60.5   | 4543   | Cistrome    | 55679                                                                                 |
| POLR2A                                      | -452.0  | -388.3  | -421.3  | 34.8   | -65.2   | 461.3  | 12.5   | 1700   | Cistrome    | 86621                                                                                 |
| POLR2A                                      | -924.7  | -929.8  | -919.8  | 366.9  | -21.4   | 443.1  | 74.8   | 24151  | Cistrome    | 92091                                                                                 |
| POLR2A                                      | -652.8  | -656.2  | -652.2  | 400.9  | 1.3     | 438.1  | 121.8  | 40923  | Cistrome    | 39917                                                                                 |
| POLR2A                                      | -819.1  | -807.4  | -804.5  | 351.8  | -27.9   | 439.6  | 118.3  | 23335  | Cistrome    | 88903                                                                                 |
| POLR2A                                      | -644.3  | -649.4  | -652.1  | 395.9  | 1.1     | 438.9  | 121.9  | 41125  | Cistrome    | 39921                                                                                 |
| POLR2A                                      | -963.2  | -962.3  | -955.4  | 360.7  | -28.4   | 436.8  | 50.4   | 23301  | Cistrome    | 89219                                                                                 |
| POLR2A                                      | -940.5  | -950.6  | -954.2  | 399.7  | -4.1    | 434.6  | 49.2   | 24689  | Cistrome    | 93206                                                                                 |
| POLR2A                                      | -1014.6 | -1051.9 | -1017.0 | 362.7  | -32.0   | 429.4  | 27.6   | 20360  | Cistrome    | 89218                                                                                 |
| POLR2A                                      | -903.8  | -909.0  | -904.4  | 350.1  | -40.8   | 429.6  | 101.3  | 20196  | Cistrome    | 83958                                                                                 |
| POLR2A                                      | -841.8  | -849.6  | -844.5  | 380.7  | -7.4    | 419.2  | 25.1   | 25213  | Cistrome    | 88093                                                                                 |
| POLR2A                                      | -874.5  | -864.5  | -859.4  | 338.6  | -57.3   | 420.7  | 70.2   | 19821  | Cistrome    | 83956                                                                                 |
| POLR2A                                      | -857.3  | -845.8  | -844.8  | 348.6  | -31.3   | 415.3  | 36.4   | 20421  | Cistrome    | 83953                                                                                 |
| POLR2A                                      | -919.5  | -918.3  | -918.0  | 380.1  | -9.1    | 414.1  | 18.4   | 21544  | Cistrome    | 93205                                                                                 |
| POLR2A                                      | -843.9  | -922.3  | -921.9  | 429.4  | 15.8    | 417.8  | 160.2  | 45426  | Cistrome    | 57088                                                                                 |
| POLR2A                                      | -601.9  | -573.6  | -402.9  | 26.7   | -156.7  | 417.0  | 9.2    | 2749   | Cistrome    | 55677                                                                                 |
| POLR2A                                      | -936.3  | -945.2  | -938.1  | 330.0  | -45.3   | 409.7  | 30.6   | 17288  | Cistrome    | 83950                                                                                 |
| POLR2A                                      | -949.2  | -1010.8 | -1020.3 | 395.7  | -0.5    | 402.0  | 20.0   | 27176  | Cistrome    | 5661                                                                                  |
| POLR2A                                      | -793.7  | -794.4  | -781.8  | 350.6  | -15.7   | 404.8  | 14.6   | 21269  | Cistrome    | 83959                                                                                 |
| POLR2A                                      | -742.6  | -731.6  | -732.2  | 341.6  | -9.0    | 404.3  | 20.6   | 23176  | Cistrome    | 88100                                                                                 |
| POLR2A                                      | -743.5  | -732.8  | -735.3  | 352.1  | -7.5    | 401.4  | 12.9   | 24764  | Cistrome    | 82337                                                                                 |
| POLR2A                                      | -724.8  | -701.9  | -708.1  | 341.4  | -5.9    | 399.5  | 27.9   | 23854  | Cistrome    | 88099                                                                                 |
| POLR2A                                      | -911.1  | -945.4  | -953.4  | 373.6  | -7.9    | 394.0  | 13.8   | 20284  | Cistrome    | 83342                                                                                 |
| POLR2A                                      | -1097.7 | -1135.9 | -1100.4 | 341.8  | 151.5   | 389.1  | 1.5    | 16764  | ENCODE      | ENCF271RGE.bed.gz                                                                     |
| POLR2A                                      | -865.7  | -869.2  | -879.6  | 345.1  | -32.3   | 391.7  | 9.8    | 18859  | Cistrome    | 83957                                                                                 |
| POLR2A                                      | -1180.4 | -1255.8 | -1171.2 | 339.8  | -20.7   | 387.4  | 1.5    | 15512  | ENCODE      | ENCF786BQV.bed.gz                                                                     |
| POLR2A                                      | -710.6  | -701.0  | -697.4  | 340.5  | -5.1    | 396.0  | 24.2   | 22757  | Cistrome    | 83951                                                                                 |
| POLR2A                                      | -1014.6 | -1007.6 | -1005.5 | 371.0  | -14.9   | 387.3  | 9.4    | 18540  | Cistrome    | 88094                                                                                 |
| POLR2A                                      | -835.7  | -820.7  | -838.2  | 364.4  | -5.5    | 387.7  | 6.6    | 21013  | Cistrome    | 88096                                                                                 |
| POLR2A                                      | -670.8  | -647.1  | -665.2  | 329.2  | -6.6    | 385.3  | 9.4    | 22512  | Cistrome    | 88091                                                                                 |
| POLR2A                                      | -608.6  | -617.7  | -617.4  | 352.9  | -1.0    | 389.1  | 38.9   | 22283  | Cistrome    | 86928                                                                                 |
| POLR2A                                      | -999.5  | -1042.7 | -1001.5 | 364.9  | -15.0   | 374.5  | 5.0    | 17656  | Cistrome    | 45715                                                                                 |
| POLR2A                                      | -853.3  | -851.4  | -841.3  | 375.3  | -2.3    | 372.0  | 1.8    | 27623  | Cistrome    | 68779                                                                                 |
| POLR2A                                      | -736.6  | -719.4  | -728.9  | 313.2  | -27.5   | 379.1  | 5.2    | 18860  | Cistrome    | 83955                                                                                 |
| POLR2A                                      | -909.4  | -892.4  | -917.5  | 378.8  | -2.7    | 375.7  | 0.8    | 19702  | Cistrome    | 49535                                                                                 |
| POLR2A                                      | -654.6  | -663.4  | -662.4  | 370.6  | 0.9     | 375.4  | 16.8   | 30595  | Cistrome    | 88095                                                                                 |
| POLR2A                                      | -1188.1 | -1177.4 | -1225.7 | 338.6  | -43.6   | 371.9  | 3.1    | 9895   | Cistrome    | 88098                                                                                 |
| POLR2A                                      | -758.9  | -742.9  | -747.1  | 362.6  | -1.5    | 368.4  | 1.5    | 26413  | Cistrome    | 68785                                                                                 |
| POLR2A                                      | -583.6  | -584.6  | -598.5  | 391.0  | 1.7     | 377.5  | 36.2   | 25215  | Cistrome    | 86927                                                                                 |
| POLR2A                                      | -768.8  | -742.1  | -754.4  | 336.8  | -14.7   | 373.1  | 1.5    | 19072  | Cistrome    | 84236                                                                                 |
| POLR2A                                      | -967.8  | -1107.6 | -1049.3 | 275.6  | -24.3   | 371.3  | 9.9    | 5224   | Cistrome    | 82395                                                                                 |
| POLR2A                                      | -1539.8 | -1491.4 | -1684.9 | 341.1  | -55.4   | 356.7  | 0.4    | 7560   | Cistrome    | 92088                                                                                 |
| POLR2A                                      | -837.5  | -882.5  | -848.4  | 347.9  | -12.8   | 365.0  | 5.3    | 21087  | Cistrome    | 55671                                                                                 |
| POLR2A                                      | -765.7  | -777.9  | -776.0  | 354.3  | -0.3    | 367.4  | 14.8   | 22292  | Cistrome    | 82336                                                                                 |
| POLR2A                                      | -891.2  | -904.0  | -896.4  | 383.9  | -0.2    | 360.5  | 2.1    | 26872  | Cistrome    | 1152                                                                                  |
| POLR2A                                      | -996.3  | -1034.1 | -1038.7 | 349.9  | -10.9   | 363.9  | 6.4    | 15181  | Cistrome    | 83344                                                                                 |
| POLR2A                                      | -957.7  | -979.2  | -1002.3 | 358.0  | -12.9   | 359.2  | 0.1    | 17619  | Cistrome    | 83343                                                                                 |
| POLR2A                                      | -907.3  | -869.2  | -852.6  | 357.8  | -4.4    | 357.3  | 0.3    | 23166  | Cistrome    | 68784                                                                                 |
| POLR2A                                      | -1013.0 | -1026.5 | -987.0  | 338.0  | -18.4   | 362.3  | 1.5    | 11472  | Cistrome    | 84237                                                                                 |
| POLR2A                                      | -1165.9 | -1226.7 | -1200.2 | 356.5  | -20.6   | 355.0  | 0.6    | 14701  | Cistrome    | 55662                                                                                 |
| POLR2A                                      | -881.5  | -862.9  | -887.3  | 369.8  | -5.5    | 355.3  | 2.5    | 19125  | Cistrome    | 57089                                                                                 |
| POLR2A                                      | -1232.7 | -1249.3 | -1242.7 | 352.9  | -26.7   | 351.3  | 0.1    | 14697  | Cistrome    | 55672                                                                                 |
| POLR2A                                      | -1252.6 | -1323.7 | -1270.2 | 323.8  | -34.7   | 345.3  | 1.5    | 9002   | Cistrome    | 55663                                                                                 |
| POLR2A                                      | -1012.4 | -1065.7 | -1091.5 | 351.1  | -13.3   | 356.1  | 2.4    | 14058  | Cistrome    | 83349                                                                                 |
| POLR2A                                      | -706.6  | -774.6  | -826.3  | 119.4  | -20.3   | 353.7  | 4.8    | 2841   | Cistrome    | 82396                                                                                 |
| POLR2A                                      | -560.4  | -577.3  | -585.2  | 386.9  | 2.5     | 361.4  | 35.4   | 24672  | Cistrome    | 86929                                                                                 |

|                              |         |         |         |       |        |        |        |       |          |                                                                    |
|------------------------------|---------|---------|---------|-------|--------|--------|--------|-------|----------|--------------------------------------------------------------------|
| POLR2A                       | -890.8  | -919.3  | -897.0  | 343.6 | -11.5  | 345.9  | 0.3    | 19957 | Cistrome | 68778                                                              |
| POLR2A                       | -1254.4 | -1243.7 | -1222.6 | 314.6 | -57.9  | 340.0  | 0.2    | 10710 | Cistrome | 55673                                                              |
| POLR2A                       | -670.3  | -685.3  | -679.0  | 347.7 | 0.0    | 349.6  | 6.8    | 24837 | Cistrome | 84239                                                              |
| POLR2A                       | -1085.5 | -1124.3 | -1076.7 | 331.0 | -37.0  | 343.1  | 0.4    | 14541 | Cistrome | 55675                                                              |
| POLR2A                       | -1020.0 | -1018.4 | -1004.7 | 303.2 | -56.7  | 339.3  | 0.5    | 10930 | Cistrome | 55674                                                              |
| POLR2A                       | -1108.2 | -1112.5 | -1170.2 | 276.7 | -23.4  | 342.3  | 15.0   | 5158  | Cistrome | 82394                                                              |
| POLR2A                       | -1113.9 | -1170.5 | -1228.2 | 271.3 | -34.9  | 341.8  | 8.6    | 6486  | Cistrome | 83350                                                              |
| POLR2A                       | -1118.6 | -1173.1 | -1210.7 | 314.8 | -16.0  | 323.0  | 1.7    | 9147  | Cistrome | 49533                                                              |
| POLR2A                       | -1182.7 | -1215.6 | -1241.3 | 323.8 | -17.3  | 311.9  | 0.4    | 9599  | Cistrome | 49534                                                              |
| POLR2A                       | -735.2  | -742.2  | -742.7  | 346.2 | 3.5    | 321.7  | 94.8   | 21629 | Cistrome | 89206                                                              |
| POLR2A                       | -740.6  | -780.3  | -773.5  | 307.3 | -7.0   | 303.9  | 0.1    | 21388 | Cistrome | 1151                                                               |
| POLR2A                       | -149.5  | -115.9  | -112.8  | 9.6   | -47.4  | 275.3  | 13.2   | 587   | Cistrome | 86619                                                              |
| POLR2A                       | -242.7  | -267.5  | -240.6  | 39.3  | -16.9  | 189.0  | 6.4    | 1241  | Cistrome | 86354                                                              |
| POLR2A                       | -133.5  | -135.0  | -132.1  | 34.6  | -7.5   | 127.5  | 2.0    | 429   | Cistrome | 82332                                                              |
| POLR2A                       | -324.0  | -331.7  | -321.6  | 51.9  | -17.4  | 105.3  | 0.1    | 1387  | Cistrome | 55670                                                              |
| POLR2A                       | -117.4  | -131.7  | -181.0  | 27.2  | -8.1   | 79.9   | 4.0    | 746   | Cistrome | 92642                                                              |
| POLR2A                       | -256.4  | -209.0  | -254.7  | 48.4  | -18.7  | 75.1   | 0.0    | 705   | Cistrome | 88092                                                              |
| POLR2A                       | -143.3  | -129.3  | -126.1  | 33.0  | -2.8   | 83.9   | 2.0    | 681   | Cistrome | 92641                                                              |
| POLR2A                       | -257.3  | -211.4  | -187.7  | 0.4   | -108.9 | 90.6   | 0.1    | 967   | Cistrome | 55678                                                              |
| POLR2A                       | -148.5  | -150.0  | -147.0  | 32.1  | -2.4   | 42.5   | 0.0    | 455   | Cistrome | 76192                                                              |
| POLR2A                       | -109.1  | -91.9   | -109.0  | 14.7  | -4.7   | 16.2   | -0.9   | 485   | Cistrome | 76190                                                              |
| POLR2A                       | -130.0  | -132.6  | -70.1   | -0.2  | -78.6  | 11.8   | -0.7   | 525   | Cistrome | 55680                                                              |
| POLR2A-5Sp                   | -720.0  | -699.2  | -703.5  | 347.4 | 44.1   | 478.3  | 122.5  | 40045 | ENCODE   | ENCF910KOG.bed.gz                                                  |
| POLR2A-5Sp                   | -759.6  | -741.0  | -750.8  | 345.8 | ND     | 474.6  | 92.1   | 36786 | ENCODE   | ENCF934KIL.bed.gz                                                  |
| <b>DNA accessibility</b>     |         |         |         |       |        |        |        |       |          |                                                                    |
| ATAC-seq                     | -462.3  | -474.3  | -463.6  | 398.5 | 134.5  | 384.5  | 161.3  | 61825 | Cistrome | 105339                                                             |
| ATAC-seq                     | -486.0  | -488.5  | -472.4  | 397.5 | 107.2  | 381.0  | 159.1  | 47323 | Cistrome | 105341                                                             |
| ATAC-seq                     | -441.0  | -443.5  | -436.9  | 384.2 | 110.0  | 368.7  | 149.8  | 51038 | Cistrome | 105340                                                             |
| ATAC-seq                     | -488.2  | -493.3  | -481.9  | 377.2 | 112.4  | 358.0  | 138.9  | 43777 | Cistrome | 105338                                                             |
| ATAC-seq                     | -513.5  | -488.8  | -495.1  | 305.3 | 0.0    | 337.7  | 11.9   | 4594  | Cistrome | 105336                                                             |
| ATAC-seq                     | -380.7  | -386.0  | -380.0  | 331.3 | 129.8  | 262.2  | 33.3   | 52706 | Cistrome | 66174                                                              |
| ATAC-seq                     | -347.1  | -351.8  | -347.4  | 284.6 | 121.0  | 187.1  | 0.2    | 38536 | Cistrome | 78866                                                              |
| ATAC-seq                     | -367.6  | -376.4  | -366.8  | 288.2 | 53.7   | 181.2  | 0.0    | 27142 | Cistrome | 81122                                                              |
| ATAC-seq                     | -315.4  | -321.2  | -312.9  | 273.2 | 94.2   | 165.5  | -0.4   | 36453 | Cistrome | 81121                                                              |
| ATAC-seq                     | -298.1  | -308.0  | -300.3  | 266.2 | 116.7  | 151.5  | -0.3   | 40498 | Cistrome | 78867                                                              |
| ATAC-seq                     | -355.2  | -363.0  | -350.8  | 267.8 | 129.3  | 144.5  | -1.1   | 38154 | Cistrome | 80026                                                              |
| ATAC-seq                     | -384.5  | -394.7  | -386.2  | 275.3 | 128.9  | 137.0  | -3.4   | 34053 | Cistrome | 80027                                                              |
| ATAC-seq                     | -346.3  | -352.9  | -345.5  | 264.0 | 123.9  | 135.3  | -2.9   | 34750 | Cistrome | 80024                                                              |
| ATAC-seq                     | -151.3  | -143.2  | -186.2  | 67.0  | 0.1    | 80.9   | 0.1    | 1432  | Cistrome | 105335                                                             |
| ATAC-seq                     | -110.6  | -103.7  | -146.3  | 56.4  | 0.6    | 61.4   | 0.1    | 1148  | Cistrome | 105337                                                             |
| ATAC-seq                     | -90.8   | -93.1   | -120.3  | 18.8  | 0.4    | 18.6   | -0.4   | 844   | Cistrome | 105334                                                             |
| ATAC-seq                     | -485.2  | -483.4  | -469.8  | 279.5 | 15.6   | 4.5    | -15.9  | 7797  | Cistrome | 80025                                                              |
| DNase                        | -353.6  | -361.7  | -349.3  | 356.9 | 104.8  | 390.2  | 152.8  | 80101 | Cistrome | 44956                                                              |
| DNase                        | -347.8  | -356.7  | -343.1  | 359.0 | 114.1  | 384.3  | 155.7  | 78833 | Cistrome | 42166                                                              |
| DNase                        | -344.8  | -352.8  | -339.5  | 352.4 | 107.3  | 384.0  | 156.3  | 76277 | Cistrome | 42165                                                              |
| DNase                        | -383.0  | -388.3  | -377.4  | 356.2 | 101.9  | 372.7  | 139.3  | 67217 | Cistrome | 44955                                                              |
| DNase                        | -395.6  | -406.8  | -387.9  | 384.5 | 113.3  | 375.1  | 158.6  | 59718 | Cistrome | 42167                                                              |
| DNase                        | -441.3  | -448.1  | -435.9  | 369.6 | 130.7  | 353.1  | 144.4  | 56316 | Cistrome | 42168                                                              |
| DNaseI                       | -449.9  | -452.3  | -443.5  | 339.4 | -0.1   | 376.3  | 129.9  | 50504 | Ensemble |                                                                    |
| <b>Transcription factors</b> |         |         |         |       |        |        |        |       |          |                                                                    |
| AFF4                         | -143.7  | -147.9  | -102.7  | 14.5  | -19.5  | 65.3   | 0.0    | 1126  | Cistrome | 55639                                                              |
| AFF4                         | -30.0   | -25.0   | -29.9   | 0.0   | -9.6   | 50.1   | -0.1   | 483   | Cistrome | 39916                                                              |
| AFF4                         | -147.3  | -174.6  | -111.4  | 4.0   | -17.5  | 22.5   | -0.5   | 1331  | Cistrome | 55641                                                              |
| AFF4                         | -44.9   | -76.3   | -69.6   | 12.3  | 2.0    | 5.8    | 0.4    | 3112  | Cistrome | 1140                                                               |
| AFF4                         | -83.9   | -78.3   | -57.8   | 1.5   | -14.5  | 5.8    | -6.1   | 658   | Cistrome | 55640                                                              |
| AFF4                         | -29.8   | -45.9   | -54.3   | 4.4   | 0.0    | 3.4    | 0.0    | 969   | Cistrome | 1141                                                               |
| ARID1A                       | -588.2  | -614.6  | -605.0  | 430.2 | 56.5   | 455.0  | 185.9  | 46436 | Cistrome | 88976                                                              |
| ARID1A                       | -603.8  | -616.6  | -612.4  | 404.6 | 46.4   | 410.5  | 176.9  | 21805 | Cistrome | 88981                                                              |
| ARID1A                       | -35.6   | -34.5   | -30.0   | -0.1  | 0.9    | -3.2   | -1.4   | 1872  | Cistrome | 85741                                                              |
| ARID1A                       | -46.1   | -41.7   | -39.6   | -23.8 | -5.7   | -52.1  | -68.3  | 768   | Cistrome | 85740                                                              |
| ATF3                         | -490.4  | -491.7  | -477.9  | 371.1 | 72.9   | 390.7  | 151.5  | 49476 | Cistrome | 46217                                                              |
| ATF3                         | -513.6  | -509.0  | -500.9  | 304.0 | ND     | 366.3  | 63.2   | 25474 | Ensemble | homo_sapiens.GRCh38.HCT116.ATF3.SWEmbl_R0005.peaks.20190329.bed.gz |
| ATF3                         | -332.9  | -341.7  | -332.1  | 309.8 | 108.8  | 357.3  | 161.0  | 60225 | Cistrome | 68464                                                              |
| ATF3                         | -357.8  | -359.5  | -360.7  | 278.0 | 20.1   | 306.7  | 55.1   | 25930 | Cistrome | 68460                                                              |
| ATF3                         | -190.4  | -196.7  | -166.7  | 21.0  | -7.1   | 44.0   | 0.6    | 827   | Cistrome | 68463                                                              |
| BANP                         | -18.4   | -18.9   | -23.4   | 54.2  | 24.3   | 3.3    | -0.7   | 4666  | Cistrome | 71951                                                              |
| BANP                         | -25.3   | -22.9   | -39.4   | 40.7  | 13.4   | 1.3    | -5.2   | 6183  | Cistrome | 71950                                                              |
| BRD4                         | -613.6  | -583.6  | -603.9  | 268.0 | -1.4   | 339.4  | 0.1    | 7401  | Cistrome | 68777                                                              |
| BRD4                         | -578.6  | -561.6  | -578.6  | 296.1 | -0.2   | 331.6  | 2.1    | 10531 | Cistrome | 68783                                                              |
| BRD4                         | -760.6  | -694.2  | -719.4  | 309.1 | -5.4   | 267.3  | 0.0    | 3725  | Cistrome | 67539                                                              |
| BRD4                         | -387.5  | -420.2  | -383.8  | 145.9 | -0.6   | 245.9  | 0.1    | 3745  | Cistrome | 68782                                                              |
| BRD4                         | -86.2   | -79.3   | -80.1   | 8.1   | -2.8   | 61.3   | -0.1   | 975   | Cistrome | 68776                                                              |
| BRDU                         | -138.2  | -126.6  | -81.5   | -94.3 | -24.1  | -124.7 | -177.3 | 734   | Cistrome | 91681                                                              |
| CBX3                         | -356.8  | -356.0  | -352.2  | 394.0 | 122.8  | 445.4  | 200.4  | 97142 | Cistrome | 46209                                                              |
| CBX3                         | -279.7  | -293.0  | -285.5  | 10.1  | -51.5  | 378.7  | 265.9  | 16531 | Cistrome | 9228                                                               |
| CBX3                         | -290.2  | -316.2  | -309.2  | 3.1   | -137.4 | 369.2  | 286.4  | 41056 | Cistrome | 9230                                                               |
| CBX3                         | -30.3   | -34.9   | -23.8   | 78.9  | 37.3   | 23.2   | 0.0    | 1278  | Cistrome | 9237                                                               |
| CBX3                         | -12.9   | -7.5    | -6.3    | 2.3   | 2.2    | 1.7    | 0.0    | 1491  | Cistrome | 9231                                                               |
| CBX3                         | 0.0     | 0.0     | -0.5    | 0.3   | 0.0    | 0.6    | 0.0    | 2594  | Cistrome | 9232                                                               |



|                 |         |         |         |        |        |        |        |       |          |                                                                     |
|-----------------|---------|---------|---------|--------|--------|--------|--------|-------|----------|---------------------------------------------------------------------|
| CBX3            | -19.8   | -27.4   | -19.4   | 5.0    | -27.6  | 0.6    | -2.6   | 574   | Cistrome | 9236                                                                |
| CDK9            | -850.4  | -937.0  | -939.0  | 408.6  | 25.4   | 264.1  | 6.8    | 12576 | Cistrome | 57093                                                               |
| CEBPB           | -391.6  | -396.3  | -385.2  | 359.2  | 98.2   | 400.2  | 174.4  | 66557 | Cistrome | 46206                                                               |
| CEBPB           | -418.3  | -424.2  | -410.3  | 289.8  | ND     | 375.1  | 125.0  | 30413 | Ensemble | homo_sapiens.GRCh38.HCT116.CEBPB.SWEmbl_R0005.peaks.20190329.bed.gz |
| CENPA_lift Over | -352.5  | -362.7  | -351.1  | -666.9 | -674.6 | -657.0 | -656.3 | 1056  |          | CENPA_GSM1105684_2fold_enriched_merged_hg38.bed.gz                  |
| CENPA-HuRef*    | -432.3  | -442.1  | -324.0  | -889.4 | -658.1 | -866.3 | -755.5 | 1598  | Cistrome | 40153                                                               |
| CNOT3           | -775.1  | -786.6  | -812.2  | 475.4  | 152.3  | 320.1  | 49.7   | 47784 | Cistrome | 76964                                                               |
| CTCF            | -312.7  | -327.0  | -306.4  | 332.9  | 141.9  | 330.5  | 199.2  | 54768 | Cistrome | 46218                                                               |
| CTCF            | -328.8  | -345.7  | -323.7  | 326.9  | 150.9  | 312.4  | 199.9  | 54059 | Cistrome | 85285                                                               |
| CTCF            | -288.7  | -304.2  | -283.9  | 320.6  | -290.8 | 302.2  | 190.7  | 49581 | ENCODE   | ENCF850PKJ.bed.gz                                                   |
| CTCF            | -321.1  | -339.5  | -316.9  | 316.6  | 146.7  | 300.8  | 195.5  | 41280 | Cistrome | 85284                                                               |
| CTCF            | -250.6  | -263.6  | -242.5  | 307.5  | 3.7    | 300.2  | 196.0  | 58981 | ENCODE   | ENCF518MQA.bed.gz                                                   |
| CTCF            | -286.0  | -297.8  | -274.8  | 324.1  | 144.6  | 303.6  | 195.7  | 36079 | Cistrome | 42151                                                               |
| CTCF            | -278.8  | -292.7  | -272.4  | 319.9  | 56.3   | 300.5  | 188.2  | 52155 | ENCODE   | ENCF171SNH.bed.gz                                                   |
| CTCF            | -293.2  | -308.2  | -288.4  | 316.9  | 143.7  | 300.2  | 201.8  | 29057 | Cistrome | 72779                                                               |
| CTCF            | -330.7  | -332.7  | -326.3  | 314.9  | 143.4  | 300.0  | 189.7  | 23805 | Cistrome | 85286                                                               |
| CTCF            | -249.6  | -259.3  | -238.0  | 314.7  | 154.2  | 292.3  | 185.6  | 51750 | Cistrome | 42152                                                               |
| CTCF            | -294.1  | -308.1  | -285.7  | 307.9  | 153.5  | 294.1  | 193.9  | 42363 | Cistrome | 45717                                                               |
| CTCF            | -294.1  | -307.8  | -285.4  | 307.7  | 153.3  | 294.0  | 193.9  | 42385 | Cistrome | 42148                                                               |
| CTCF            | -255.2  | -273.0  | -247.5  | 323.5  | -54.7  | 293.0  | 232.1  | 30116 | ENCODE   | ENCF056ESE.bed.gz                                                   |
| CTCF            | -269.1  | -284.5  | -264.4  | 303.6  | 152.5  | 285.8  | 183.6  | 52042 | Cistrome | 42149                                                               |
| CTCF            | -268.9  | -284.1  | -264.2  | 303.5  | 152.4  | 285.7  | 183.4  | 52021 | Cistrome | 45716                                                               |
| CTCF            | -273.9  | -287.0  | -268.2  | 316.6  | 156.9  | 283.8  | 180.6  | 45381 | Cistrome | 42154                                                               |
| CTCF            | -242.8  | -255.4  | -235.7  | 306.0  | 149.5  | 283.0  | 186.0  | 45369 | Cistrome | 42150                                                               |
| CTCF            | -239.7  | -250.6  | -235.0  | 315.9  | -59.0  | 284.4  | 227.3  | 35571 | ENCODE   | ENCF549PGC.bed.gz                                                   |
| CTCF            | -269.5  | -285.7  | -264.8  | 317.5  | 155.7  | 283.0  | 176.6  | 49084 | Cistrome | 42153                                                               |
| CTCF            | -274.6  | -291.0  | -268.5  | 277.8  | ND     | 264.4  | 176.5  | 50595 | Ensemble | homo_sapiens.GRCh38.HCT116.CTCF.SWEmbl_R0005.peaks.20190329.bed.gz  |
| EGR1            | -584.6  | -587.7  | -578.0  | 403.0  | 46.8   | 409.9  | 151.1  | 47145 | Cistrome | 46214                                                               |
| Egr1            | -800.6  | -780.5  | -799.7  | 341.8  | 0.0    | 393.0  | 6.1    | 17084 | Ensemble | homo_sapiens.GRCh38.HCT116.Egr1.SWEmbl_R0005.peaks.20190329.bed.gz  |
| ELF1            | -554.5  | -563.6  | -554.3  | 393.0  | 66.9   | 400.8  | 146.2  | 45158 | Cistrome | 46202                                                               |
| ELF1            | -679.7  | -685.1  | -669.2  | 323.6  | ND     | 385.4  | 33.6   | 24133 | Ensemble | homo_sapiens.GRCh38.HCT116.ELF1.SWEmbl_R0005.peaks.20190329.bed.gz  |
| ELL2            | -599.4  | -606.4  | -546.7  | 230.5  | -3.7   | 356.5  | 7.5    | 4198  | Cistrome | 55645                                                               |
| ELL2            | -261.2  | -250.9  | -241.6  | 61.6   | -2.9   | 139.3  | 0.3    | 1977  | Cistrome | 55647                                                               |
| ELL2            | -157.2  | -170.0  | -163.5  | 46.3   | -0.8   | 89.6   | 0.5    | 1387  | Cistrome | 55646                                                               |
| ELL2            | -152.7  | -191.3  | -151.1  | 39.3   | -0.6   | 69.0   | 0.5    | 1098  | Cistrome | 55648                                                               |
| ELL2            | -133.0  | -153.0  | -131.8  | 28.9   | 0.1    | 26.5   | 0.3    | 1683  | Cistrome | 1143                                                                |
| ELL2            | -30.5   | -23.5   | -31.9   | 1.1    | -0.1   | 8.2    | 0.1    | 1036  | Cistrome | 1144                                                                |
| EP300           | -259.9  | -250.9  | -257.9  | 250.5  | 28.5   | 273.8  | 17.6   | 19798 | Cistrome | 42907                                                               |
| EZH2            | -69.4   | -60.1   | -42.9   | 0.1    | 2.7    | -1.8   | -14.4  | 672   | Cistrome | 101554                                                              |
| EZH2            | -25.1   | -22.1   | -19.4   | 2.8    | -33.3  | -5.1   | -7.0   | 660   | ENCODE   | ENCF806ESQ.bed.gz                                                   |
| EZH2            | -18.9   | -9.4    | -9.9    | 0.9    | ND     | -7.1   | -7.5   | 867   | ENCODE   | ENCF926EZW.bed.gz                                                   |
| EZH2            | -94.9   | -87.3   | -37.9   | -21.5  | -8.4   | -53.6  | -63.9  | 616   | Cistrome | 101555                                                              |
| EZH2            | -265.8  | -315.2  | -231.5  | -11.0  | ND     | -240.6 | -163.6 | 5222  | Ensemble | homo_sapiens.GRCh38.HCT116.EZH2.SWEmbl_R0005.peaks.20190329.bed.gz  |
| EZH2-T487p      | -71.9   | -84.8   | -40.9   | -36.8  | -13.8  | -91.4  | -106.0 | 560   | Cistrome | 100246                                                              |
| EZH2-T487p      | -4.6    | -4.1    | -4.4    | 7.5    | 125.9  | -0.5   | -0.1   | 425   | ENCODE   | ENCF325ZGB.bed.gz                                                   |
| FOSL1           | -388.8  | -397.4  | -386.8  | 366.3  | 109.4  | 401.9  | 174.0  | 70141 | Cistrome | 46212                                                               |
| FOSL1           | -376.0  | -376.1  | -383.3  | 279.6  | -615.0 | 352.2  | 87.0   | 31315 | Ensemble | homo_sapiens.GRCh38.HCT116.FOSL1.SWEmbl_R0005.peaks.20190329.bed.gz |
| HEXIM1          | -593.4  | -631.4  | -620.8  | 460.5  | 161.7  | 325.7  | 138.0  | 55397 | Cistrome | 57092                                                               |
| HNF4A           | -214.7  | -193.7  | -197.2  | 227.0  | 2.1    | 348.6  | 35.7   | 3800  | Cistrome | 54666                                                               |
| HNF4A           | -390.9  | -391.6  | -376.9  | 275.2  | 45.5   | 340.9  | 184.7  | 25783 | Cistrome | 54673                                                               |
| HNF4A           | -311.9  | -269.2  | -246.3  | 294.5  | 2.2    | 336.6  | 29.7   | 4471  | Cistrome | 54665                                                               |
| HNF4A           | -396.1  | -416.5  | -388.0  | 272.3  | 29.7   | 331.0  | 177.8  | 15595 | Cistrome | 54674                                                               |
| HNF4A           | -132.9  | -109.2  | -119.1  | 137.3  | 1.3    | 241.2  | 20.2   | 2286  | Cistrome | 54660                                                               |
| HSF1            | -115.8  | -119.3  | -91.6   | 2.6    | -1.0   | 9.0    | 0.0    | 851   | Cistrome | 51108                                                               |
| HSF1            | -128.9  | -109.9  | -82.8   | 2.6    | -1.1   | 6.9    | -0.4   | 772   | Cistrome | 51110                                                               |
| HSF1            | -80.6   | -117.7  | -69.3   | -0.4   | -9.8   | 0.1    | -2.9   | 486   | Cistrome | 51107                                                               |
| ICE1            | -473.8  | -469.4  | -464.1  | 356.2  | 103.1  | 365.1  | 159.2  | 41898 | Cistrome | 39920                                                               |
| ICE1            | -443.4  | -451.1  | -444.4  | 349.3  | 91.0   | 356.7  | 155.0  | 39819 | Cistrome | 39914                                                               |
| ICE1            | -59.9   | -49.5   | -66.0   | 10.1   | -1.2   | 50.1   | 1.2    | 548   | Cistrome | 39919                                                               |
| ICE2            | -123.2  | -92.9   | -98.5   | 173.9  | 5.6    | 204.1  | 18.9   | 2316  | Cistrome | 39924                                                               |
| JUND            | -420.8  | -427.6  | -416.1  | 377.0  | 108.6  | 412.3  | 172.0  | 69908 | Cistrome | 46213                                                               |
| Jund            | -440.3  | -437.6  | -442.5  | 291.0  | ND     | 375.5  | 79.2   | 31993 | Ensemble | homo_sapiens.GRCh38.HCT116.Jund.SWEmbl_R0005.peaks.20190329.bed.gz  |
| JUND            | -260.8  | -254.5  | -255.1  | 222.5  | ND     | 275.0  | 74.1   | 23965 | ENCODE   | ENCF998KQO.bed.gz                                                   |
| JUND            | -261.3  | -261.6  | -268.8  | 221.2  | -2.4   | 269.5  | 54.9   | 21907 | ENCODE   | ENCF333VCK.bed.gz                                                   |
| KAT2B           | -153.6  | -109.7  | -117.6  | -21.5  | -12.1  | -57.4  | -88.8  | 728   | Cistrome | 85025                                                               |
| KDM3B           | -412.9  | -401.7  | -395.0  | 313.6  | 57.5   | 310.7  | 173.9  | 15346 | Cistrome | 82127                                                               |
| KDM3B           | -289.4  | -262.0  | -240.6  | 337.5  | 32.6   | 312.9  | 125.6  | 5043  | Cistrome | 82126                                                               |
| KDM5A           | -1055.0 | -1298.9 | -1138.1 | 146.8  | -26.2  | 363.5  | 32.8   | 4675  | Cistrome | 92366                                                               |
| KDM5A           | -1036.4 | -1241.3 | -1118.4 | 173.6  | -2.1   | 358.0  | 28.4   | 5429  | Cistrome | 92367                                                               |
| KMT2B           | -260.0  | -255.2  | -259.1  | 262.6  | 25.1   | 299.3  | 27.7   | 21353 | Cistrome | 42906                                                               |
| LARP7           | -530.1  | -568.0  | -571.3  | 422.3  | 181.8  | 255.8  | 122.0  | 39326 | Cistrome | 57091                                                               |
| LEO1            | -331.4  | -244.1  | -261.0  | 16.0   | -19.1  | 242.7  | 13.1   | 1500  | Cistrome | 55661                                                               |

|         |         |         |         |       |        |       |       |        |          |                                                                      |
|---------|---------|---------|---------|-------|--------|-------|-------|--------|----------|----------------------------------------------------------------------|
| MAX     | -504.0  | -512.3  | -499.0  | 417.9 | 118.8  | 446.1 | 176.8 | 74266  | Cistrome | 46216                                                                |
| Max     | -719.8  | -735.1  | -720.0  | 380.4 | ND     | 438.6 | 118.9 | 33616  | Ensemble | homo_sapiens.GRCh38.HCT116.Max.SWEmbl_R0005.peaks.20190329.bed.gz    |
| MCM2    | -322.6  | -334.4  | -326.6  | 242.2 | 234.7  | 148.3 | 137.4 | 65110  | Cistrome | 83886                                                                |
| MECP2   | -458.7  | -465.9  | -462.9  | 316.3 | 39.8   | 322.7 | 163.8 | 34007  | Cistrome | 34399                                                                |
| MECP2   | -310.3  | -342.2  | -261.8  | 255.3 | 20.4   | 239.1 | 51.5  | 8828   | Cistrome | 34400                                                                |
| MTA2    | -59.9   | -47.3   | -45.2   | -37.4 | -21.8  | -77.1 | -77.1 | 474    | Cistrome | 87604                                                                |
| MYC     | -1065.3 | -1051.0 | -1083.3 | 358.0 | -7.6   | 361.9 | 1.0   | 13446  | Cistrome | 70809                                                                |
| MYC     | -1008.2 | -1035.8 | -1016.0 | 371.7 | -1.9   | 343.1 | 2.8   | 15844  | Cistrome | 70807                                                                |
| MYC     | -888.2  | -879.5  | -893.3  | 404.6 | 0.0    | 328.1 | 1.5   | 17904  | Cistrome | 70806                                                                |
| MYC     | -1150.6 | -1141.9 | -1195.5 | 381.5 | -6.7   | 318.3 | 0.0   | 8287   | Cistrome | 70805                                                                |
| MYC     | -966.3  | -940.6  | -954.0  | 426.7 | 0.0    | 301.3 | -0.5  | 11599  | Cistrome | 70810                                                                |
| MYC     | -501.7  | -538.9  | -540.1  | 357.7 | 116.5  | 301.3 | 127.9 | 48637  | Cistrome | 70808                                                                |
| MYC     | -407.9  | -412.4  | -403.5  | 163.6 | -0.3   | 107.5 | 0.5   | 1306   | Cistrome | 76186                                                                |
| NIPBL   | -578.5  | -575.8  | -568.9  | 357.0 | 0.8    | 355.4 | 18.0  | 29832  | Cistrome | 84953                                                                |
| NIPBL   | -570.7  | -562.9  | -555.6  | 346.5 | 0.3    | 349.8 | 17.7  | 28604  | Cistrome | 88450                                                                |
| NROB2   | -133.1  | -118.3  | -101.0  | 4.6   | -4.0   | 33.5  | 0.0   | 603    | Cistrome | 55660                                                                |
| PAF1    | -713.0  | -671.5  | -658.2  | 279.0 | -12.3  | 411.6 | 28.0  | 9761   | Cistrome | 88906                                                                |
| PAF1    | -716.2  | -735.7  | -720.3  | 365.6 | -2.7   | 389.7 | 10.0  | 26835  | Cistrome | 55667                                                                |
| PAF1    | -738.2  | -733.7  | -719.3  | 334.2 | -1.0   | 365.9 | 17.7  | 20824  | Cistrome | 84915                                                                |
| PAF1    | -1236.5 | -1214.6 | -1235.9 | 182.7 | -73.3  | 347.1 | 6.3   | 5762   | Cistrome | 55666                                                                |
| PAF1    | -1061.6 | -1066.0 | -1043.8 | 339.7 | -41.9  | 348.1 | 0.2   | 15947  | Cistrome | 55668                                                                |
| PAF1    | -1017.9 | -1019.0 | -1016.2 | 328.0 | -50.6  | 341.5 | 0.0   | 16156  | Cistrome | 55664                                                                |
| PAF1    | -1261.5 | -1233.2 | -1184.1 | 311.9 | -46.3  | 335.7 | 0.4   | 10352  | Cistrome | 55669                                                                |
| PAF1    | -1180.3 | -1262.1 | -1233.7 | 278.7 | -62.6  | 327.8 | 2.1   | 7895   | Cistrome | 55665                                                                |
| PHIP    | -487.5  | -491.6  | -496.2  | 400.5 | 39.5   | 386.7 | 128.3 | 41242  | Cistrome | 85463                                                                |
| PHIP    | -500.7  | -507.5  | -519.6  | 380.4 | 34.0   | 355.8 | 97.9  | 36060  | Cistrome | 85459                                                                |
| PHIP    | -591.6  | -612.5  | -612.7  | 396.1 | 12.2   | 344.7 | 34.8  | 15366  | Cistrome | 85462                                                                |
| PHIP    | -489.6  | -585.1  | -437.4  | 391.1 | 1.1    | 326.7 | 6.9   | 3676   | Cistrome | 87886                                                                |
| PHIP    | -911.1  | -977.0  | -929.8  | 388.1 | 0.0    | 326.1 | 0.8   | 7263   | Cistrome | 87884                                                                |
| PHIP    | -849.7  | -885.9  | -900.2  | 386.2 | 0.0    | 317.4 | 0.3   | 4636   | Cistrome | 85464                                                                |
| PHIP    | -191.3  | -176.5  | -141.4  | 11.3  | -23.5  | 67.8  | -0.1  | 891    | Cistrome | 85465                                                                |
| RAD21   | -333.5  | -343.7  | -329.8  | 365.2 | 138.3  | 380.4 | 172.6 | 91714  | Cistrome | 46207                                                                |
| RAD21   | -709.2  | -760.2  | -743.3  | 430.4 | 174.4  | 384.7 | 208.0 | 67731  | Cistrome | 71320                                                                |
| RAD21   | -669.5  | -713.1  | -709.9  | 439.5 | 202.9  | 373.6 | 217.8 | 98855  | Cistrome | 71322                                                                |
| RAD21   | -439.8  | -379.1  | -342.8  | 380.1 | 58.8   | 365.7 | 264.1 | 6718   | Cistrome | 85290                                                                |
| RAD21   | -644.1  | -698.2  | -685.1  | 419.1 | 201.4  | 348.2 | 197.7 | 90949  | Cistrome | 71321                                                                |
| Rad21   | -314.6  | -326.4  | -303.6  | 316.7 | ND     | 329.1 | 183.8 | 49942  | Ensemble | homo_sapiens.GRCh38.HCT116.Rad21.SWEmbl_R0005.peaks.20190329.bed.gz  |
| RAD21   | -615.9  | -664.5  | -649.3  | 384.9 | 194.1  | 307.1 | 169.7 | 84470  | Cistrome | 71319                                                                |
| RAD21   | -302.7  | -313.5  | -293.2  | 306.2 | 141.7  | 295.6 | 188.3 | 36976  | Cistrome | 81366                                                                |
| REST    | -500.8  | -511.1  | -529.0  | 313.2 | 17.7   | 323.1 | 56.3  | 14210  | Cistrome | 46203                                                                |
| REST    | -126.0  | -132.9  | -117.3  | 124.9 | 69.5   | 55.6  | 17.8  | 3483   | Ensemble | homo_sapiens.GRCh38.HCT116.REST.SWEmbl_R0005.peaks.20190329.bed.gz   |
| SIN3A   | -710.8  | -704.0  | -695.4  | 337.4 | -10.0  | 413.0 | 31.2  | 27435  | Ensemble | homo_sapiens.GRCh38.HCT116.SIN3A.SWEmbl_R0005.peaks.20190329.bed.gz  |
| SIN3A   | -637.4  | -636.8  | -635.4  | 370.8 | 3.5    | 380.2 | 72.4  | 33224  | Cistrome | 46208                                                                |
| SIRT1   | -684.0  | -706.3  | -707.2  | 334.6 | 252.0  | 252.3 | 163.9 | 39329  | Cistrome | 83885                                                                |
| SKP2    | -636.7  | -641.8  | -669.3  | 348.0 | 282.9  | 277.2 | 162.3 | 100000 | Cistrome | 93781                                                                |
| SMARCA4 | -152.2  | -114.3  | -127.6  | 107.0 | 2.8    | 242.1 | 1.0   | 7586   | Cistrome | 72102                                                                |
| SMARCA4 | -22.5   | -19.3   | -12.4   | 0.1   | -1.1   | 9.2   | -0.5  | 767    | Cistrome | 72100                                                                |
| SMARCC1 | -87.6   | -74.9   | -74.8   | 49.7  | 1.6    | 149.3 | 0.2   | 6118   | Cistrome | 72101                                                                |
| SMARCC1 | -2.2    | -0.8    | -0.9    | 0.4   | -0.5   | 13.9  | -0.8  | 1081   | Cistrome | 72099                                                                |
| SMC1A   | -454.4  | -433.1  | -396.4  | 331.4 | 17.3   | 324.4 | 39.9  | 7426   | Cistrome | 85288                                                                |
| SMC1A   | -273.8  | -286.0  | -270.7  | 305.1 | 132.7  | 285.3 | 161.6 | 43636  | Cistrome | 85289                                                                |
| SP1     | -1040.6 | -1141.5 | -1112.3 | 597.6 | 225.7  | 500.9 | 232.5 | 82625  | Cistrome | 5395                                                                 |
| SP1     | -441.7  | -443.3  | -438.7  | 391.5 | 110.2  | 427.3 | 173.0 | 72471  | Cistrome | 46215                                                                |
| SP1     | -525.7  | -524.2  | -532.0  | 324.3 | 10.9   | 401.0 | 66.8  | 34242  | Ensemble | homo_sapiens.GRCh38.HCT116.SP1.SWEmbl_R0005.peaks.20190329.bed.gz    |
| SP1     | -1147.5 | -1179.0 | -1125.4 | 420.6 | 0.1    | 387.6 | 23.3  | 21322  | Cistrome | 70813                                                                |
| SP1     | -1078.5 | -1143.4 | -1125.6 | 452.5 | 11.9   | 386.6 | 44.3  | 24694  | Cistrome | 70811                                                                |
| SP1     | -1255.1 | -1387.0 | -1295.7 | 438.2 | 0.2    | 382.0 | 10.1  | 19784  | Cistrome | 70812                                                                |
| SP1     | -433.7  | -462.8  | -467.2  | 415.5 | 172.8  | 376.0 | 218.0 | 100000 | Cistrome | 70814                                                                |
| SP1     | -557.1  | -581.9  | -592.5  | 421.5 | 39.3   | 304.1 | 15.2  | 30938  | Cistrome | 70815                                                                |
| SP1     | -455.9  | -494.8  | -508.3  | 346.9 | 82.0   | 297.7 | 119.8 | 46179  | Cistrome | 70816                                                                |
| SRF     | -463.2  | -464.5  | -455.0  | 379.4 | 101.1  | 402.6 | 167.9 | 57748  | Cistrome | 46211                                                                |
| Srf     | -581.9  | -563.4  | -562.7  | 321.5 | -142.5 | 399.9 | 112.4 | 28421  | Ensemble | homo_sapiens.GRCh38.HCT116.Srf.SWEmbl_R0005.peaks.20190329.bed.gz    |
| TCF4    | -30.6   | -16.5   | -18.1   | 47.3  | 3.7    | 55.8  | -0.1  | 3003   | Cistrome | 54661                                                                |
| TCF4    | -26.4   | -32.5   | -26.0   | 33.4  | 2.3    | 43.5  | 0.0   | 1508   | Cistrome | 54669                                                                |
| TCF4    | -27.3   | -17.1   | -18.9   | 34.7  | 4.0    | 36.1  | 0.0   | 1898   | Cistrome | 54664                                                                |
| TCF4    | -17.4   | -12.8   | -14.5   | 27.0  | 2.6    | 34.8  | 0.0   | 1990   | Cistrome | 54667                                                                |
| TCF4    | -35.6   | -23.6   | -20.2   | 23.4  | 2.1    | 28.0  | -0.2  | 1825   | Cistrome | 54663                                                                |
| TCF4    | -15.3   | -18.3   | -13.4   | 14.4  | 1.0    | 19.9  | 0.0   | 1043   | Cistrome | 54670                                                                |
| TCF4    | -17.3   | -10.2   | -9.3    | 10.2  | 0.6    | 16.0  | -0.2  | 872    | Cistrome | 54662                                                                |
| TCF7L1  | -597.7  | -645.1  | -647.4  | 420.3 | 131.2  | 347.0 | 128.5 | 47979  | Cistrome | 70804                                                                |
| TCF7L1  | -362.2  | -372.5  | -375.3  | 326.1 | 1.1    | 269.1 | 0.0   | 11321  | Cistrome | 70803                                                                |
| TCF7L1  | -219.6  | -218.8  | -210.2  | 241.5 | 0.2    | 267.7 | 0.0   | 8191   | Cistrome | 70802                                                                |
| TCF7L2  | -428.4  | -417.7  | -409.9  | 357.1 | 88.8   | 340.0 | 103.4 | 45234  | Cistrome | 45714                                                                |
| TCF7L2  | -472.8  | -460.2  | -457.6  | 328.2 | -133.7 | 323.2 | 3.1   | 20454  | ENCODE   | ENCF199EHQ.bed.gz                                                    |
| TCF7L2  | -461.7  | -450.0  | -446.8  | 328.0 | -5.6   | 314.1 | 0.8   | 15431  | ENCODE   | ENCF736EVD.bed.gz                                                    |
| TCF7L2  | -347.6  | -280.3  | -252.6  | 290.4 | 272.6  | 288.7 | 0.0   | 4946   | Ensemble | homo_sapiens.GRCh38.HCT116.TCF7L2.SWEmbl_R0005.peaks.20190329.bed.gz |

|        |         |         |         |        |        |       |       |        |          |                                                                      |
|--------|---------|---------|---------|--------|--------|-------|-------|--------|----------|----------------------------------------------------------------------|
| TEAD4  | -449.3  | -450.6  | -447.9  | 340.1  | 48.0   | 360.2 | 123.8 | 39773  | Cistrome | 46210                                                                |
| TEAD4  | -423.1  | -412.1  | -408.6  | 251.5  | -197.9 | 301.6 | 0.4   | 11796  | Ensemble | homo_sapiens.GRCh38.HCT116.TEAD4.SWEmbl_R0005.peaks.20190329.bed.gz  |
| TEI2   | -691.8  | -748.7  | -669.0  | 160.5  | -26.6  | 267.0 | 0.2   | 3570   | Cistrome | 50981                                                                |
| TOP1   | -339.6  | -310.6  | -298.8  | 309.6  | 88.3   | 266.6 | 126.4 | 11177  | Cistrome | 68774                                                                |
| TOP1   | -183.9  | -183.2  | -187.6  | 264.0  | 27.2   | 236.9 | 50.1  | 7423   | Cistrome | 68781                                                                |
| TOP1   | -168.5  | -183.5  | -184.0  | 302.1  | 25.7   | 168.6 | 36.0  | 4395   | Cistrome | 68775                                                                |
| TOP1   | -255.0  | -246.6  | -252.7  | 321.9  | 16.5   | 123.7 | 17.4  | 3755   | Cistrome | 68780                                                                |
| TP53   | -78.2   | -78.6   | -74.7   | 214.1  | 14.3   | 236.6 | 41.1  | 9393   | Cistrome | 82544                                                                |
| TP53   | -21.2   | -23.3   | -26.1   | 45.2   | 5.0    | 47.4  | 2.8   | 3353   | Cistrome | 50345                                                                |
| TP53   | -33.6   | -30.0   | -25.2   | 22.2   | 0.4    | 18.6  | 0.2   | 1004   | Cistrome | 92110                                                                |
| TP53   | -14.4   | -15.4   | -15.3   | 29.7   | 2.0    | 12.5  | 0.5   | 781    | Cistrome | 53285                                                                |
| TP53   | -17.9   | -17.6   | -23.9   | 30.4   | 2.7    | 12.5  | ND    | 717    | Cistrome | 53286                                                                |
| TP53   | -24.1   | -24.5   | -23.6   | 13.8   | 0.5    | 13.1  | 0.2   | 1368   | Cistrome | 82545                                                                |
| TP53   | -14.0   | -17.8   | -31.9   | 32.7   | 4.4    | 5.9   | 0.0   | 1900   | Cistrome | 68462                                                                |
| TP53   | -15.8   | -19.2   | -21.8   | 2.2    | 0.2    | 0.2   | -0.2  | 807    | Cistrome | 50344                                                                |
| TP53   | -5.0    | -7.5    | -17.9   | 5.9    | 1.1    | 0.0   | -1.1  | 880    | Cistrome | 68461                                                                |
| TRIM28 | -799.4  | -878.3  | -838.9  | 408.5  | 78.4   | 258.4 | 15.9  | 24209  | Cistrome | 57090                                                                |
| USF1   | -474.1  | -476.9  | -481.6  | 384.6  | 118.5  | 397.2 | 173.0 | 57530  | Cistrome | 46205                                                                |
| USF1   | -703.1  | -689.1  | -718.1  | 332.1  | -0.2   | 387.6 | 61.2  | 9985   | Ensemble | homo_sapiens.GRCh38.HCT116.USF1.SWEmbl_R0005.peaks.20190329.bed.gz   |
| USP49  | -134.5  | -131.3  | -99.0   | 108.1  | 16.5   | 75.3  | 0.8   | 2124   | Cistrome | 39345                                                                |
| USP49  | -99.3   | -109.3  | -80.3   | 16.8   | 5.3    | 5.8   | 0.9   | 1350   | Cistrome | 39347                                                                |
| YY1    | -675.4  | -667.8  | -681.1  | 353.8  | 40.7   | 392.2 | 66.5  | 17804  | ENCODE   | ENCF094BQZ.bed.gz                                                    |
| YY1    | -720.9  | -716.2  | -739.7  | 309.3  | 172.4  | 390.6 | 34.3  | 7329   | ENCODE   | ENCF279EVE.bed.gz                                                    |
| YY1    | -503.8  | -507.8  | -502.6  | 381.6  | 72.2   | 381.9 | 143.4 | 45823  | Cistrome | 46204                                                                |
| Yy1    | -857.0  | -855.5  | -817.9  | 284.5  | -18.3  | 387.3 | 15.0  | 4670   | Ensemble | homo_sapiens.GRCh38.HCT116.Yy1.SWEmbl_R0005.peaks.20190329.bed.gz    |
| ZBTB33 | -776.5  | -775.7  | -737.2  | 293.9  | -19.3  | 374.4 | 0.7   | 5886   | ENCODE   | ENCF422MCZ.bed.gz                                                    |
| ZBTB33 | -660.5  | -637.7  | -649.0  | 313.2  | -1.3   | 365.2 | 8.3   | 13174  | Cistrome | 46200                                                                |
| ZBTB33 | -362.0  | -371.1  | -334.6  | 115.1  | 55.2   | 302.3 | 0.4   | 2206   | ENCODE   | ENCF795HVQ.bed.gz                                                    |
| ZBTB33 | -252.4  | -273.9  | -174.7  | 23.1   | -321.5 | 96.7  | 0.1   | 1435   | Ensemble | homo_sapiens.GRCh38.HCT116.ZBTB33.SWEmbl_R0005.peaks.20190329.bed.gz |
| ZC3H8  | -38.6   | -58.3   | -28.9   | 222.1  | 6.6    | 247.1 | 32.2  | 5255   | Cistrome | 39918                                                                |
| ZFX    | -1164.7 | -1207.1 | -1181.3 | 388.8  | -5.8   | 396.9 | 10.5  | 23446  | ENCODE   | ENCF215SIC.bed.gz                                                    |
| ZFX    | -768.2  | -747.7  | -771.8  | 345.0  | -3.6   | 336.6 | 0.8   | 17139  | Cistrome | 81159                                                                |
| ZFX    | -1377.6 | -1448.1 | -1507.3 | 399.4  | 0.0    | 323.6 | 0.9   | 15109  | ENCODE   | ENCF897IRP.bed.gz                                                    |
| ZFX    | -362.4  | -393.0  | -388.2  | 145.2  | 95.0   | 151.0 | 108.9 | 100000 | Cistrome | 81160                                                                |
| ZNF274 | -28.4   | -24.8   | -20.5   | -170.4 | 2.6    | -65.4 | -55.6 | 1079   | Ensemble | homo_sapiens.GRCh38.HCT116.ZNF274.SWEmbl_R0005.peaks.20190329.bed.gz |

82

83

#### 84 ChIP-seq for H3K36me3 histone marker in non-treated and RTX treated UGI-expressing HCT116 cells.

85

86 To check, if drug treatment affects the histone marker distribution, a ChIP-seq experiment for H3K36me3  
87 marker was performed on non-treated and RTX treated HCT116 cells that were also expressing UGI (cf.  
88 Materials and Methods). The pre-processing of the raw data was performed in the same way as in case  
89 of the U-DNA-Seq applying the HCT116 specific blacklist (cf. Supplementary file 1 and Figure 2-figure  
90 supplement 2). The statistics on these pre-processing steps are provided here in Supplementary file 3-  
91 table 2.

92

#### 93 Supplementary file 3-table 2. Statistics on pre-processing of H3K36me3 ChIP-seq data.

| sample                    | number of raw reads | number of mapped reads | unmapped reads |      | uniquely mapped reads |       | uniquely mapped reads after blacklisting |       |
|---------------------------|---------------------|------------------------|----------------|------|-----------------------|-------|------------------------------------------|-------|
|                           |                     |                        | number         | %    | number                | %     | number                                   | %     |
| NT_UGI H3K36me3 ChIP-seq  | 126640549           | 126515616              | 124933         | 0.10 | 119567538             | 94.41 | 114315230                                | 90.27 |
| RTX_UGI H3K36me3 ChIP-seq | 170421288           | 170127897              | 293391         | 0.17 | 162137011             | 95.14 | 155810499                                | 91.43 |

94

95 The peak calling was performed by MACS2 using broad peak option as given below using an input  
96 control selected from the ENCODE (ENCFF489VMD).

```
97 $ macs2 callpeak -t NAME(IP).filtered_blacklisted.bam -c  
98 ENCFF489VMD.filtered_blacklisted.bam --broad -g 2830361285 --broad-cutoff 0.05 -n  
99 NAME_ChIPvsCtr_0p05 --outdir {PATH} --nomodel -f BAMPE --cutoff-analysis
```

100 The fold change tracks were also calculated comparing to an input control as given below.

```
101 $ bamCoverage -b NAME.filtered_blacklisted.bam -o NAME.bin100.RPGC.bw --binSize 100  
102 --verbose --normalizeUsing RPGC --effectiveGenomeSize 2792809237 -p 32 --extendReads
```

```
103 $ bigwigCompare -b1 NAME.bin100.RPGC.bw -b2  
104 ENCFF489VMD.filtered_blacklisted.bin100.RPGC.bw -o  
105 NAME_foldChange.bin100bp.RPGC.ratio.bw -of bigwig --binSize 100 -v -p 32 --skipNAs -  
106 -operation ratio
```

107 These processed files as well as the corresponding raw data were uploaded to the GEO (GSE153407,  
108 that is combined with the U-DNA-Seq data under GSE153408). These were compared to each other as  
109 well as to the H3K36me3 ChIP-seq foldChange tracks downloaded from the ENCODE using  
110 multiBigWigSummary (Figure 4-figure supplement 1).

```
111 $ multiBigwigSummary bins -b ENCFF238GBP.bigWig ENCFF334KFI.bigWig  
112 ENCFF514ZYW.bigWig NT_UGI_H3K36me3_ChIP_foldChange.bin100bp.RPGC.ratio.bw  
113 RTX_UGI_H3K36me3_ChIP_foldChange.bin100bp.RPGC.ratio.bw -o  
114 mbws_Fig4FigSup1_H3K36me3ChIPseq.npz -v -p 32
```

```
115 $ plotCorrelation --corData mbws_Fig4FigSup1_H3K36me3ChIPseq.npz --corMethod pearson  
116 --whatToPlot heatmap -o mbws_Fig4FigSup1_H3K36me3ChIPseq.png -T  
117 mbws_Fig4FigSup1_H3K36me3ChIPseq --skipZeros --removeOutliers --plotNumbers --  
118 colorMap RdPu
```

119 GIGGLE scores between U-DNA-seq results and these H3K36me3 ChIP-seq peaks were calculated as  
120 it was described for other ChIP-seq data above (Figure 4A, Figure 4-source data 1).

121 The fold change track files were also included in the Segway analysis (Figure 4B, Figure 4-source data  
122 2).

123 **Genome segmentation analysis of U-DNA-Seq results and ChIP-seq data from the ENCODE using**  
124 **Segway genome segmentation algorithm.**

125 22 independent ChIP-seq experiments available for HCT116 cells in the ENCODE database were  
126 selected for this type of analysis (see Supplementary file 3-table 3). The corresponding 'fold change over  
127 control' tracks were combined with our ChIP-seq data on H3K36me3 as well as with our U-DNA-Seq data  
128 to a single genomedata file using Genomedata software (Hoffman, Buske, & Noble, 2010). In this  
129 analysis, merged ratio tracks of U-DNA enrichment were used that were calculated by bigwigCompare of  
130 the deepTools package (Ramírez et al., 2016) in the format of bw files and converted to BedGraph format.  
131 File conversions were done using BigWigToWig tool (Kuhn, Haussler, & Kent, 2013). The genome

132 segmentation analysis was confined to the core chromosomes (1 to 22, X, and Y) of GRCh38 reference  
133 genome, and the regions of our HCT116 specific blacklist were also excluded. The applied command  
134 lines are provided below.

135 File conversion and filtration in case of bigWig files from the ENCODE database:

```
136 $ bigWigToWig NAME.bigwig NAME.wig  
137 $ awk '{ if ($1 == "chr1" || $1 == "chr2" || $1 == "chr3" || $1 == "chr4" || $1 ==  
138 "chr5" || $1 == "chr6" || $1 == "chr7" || $1 == "chr8" || $1 == "chr9" || $1 ==  
139 "chr10" || $1 == "chr11" || $1 == "chr12" || $1 == "chr13" || $1 == "chr14" || $1 ==  
140 "chr15" || $1 == "chr16" || $1 == "chr17" || $1 == "chr18" || $1 == "chr19" || $1  
141 == "chr20" || $1 == "chr21" || $1 == "chr22" || $1 == "chrX" || $1 == "chrY") {print  
142 $0} }' NAME.wig > NAME.filtered.wig
```

143 File conversion and filtration in case of bw files of U-DNA-Seq ratio tracks:

```
144 $ bigWigToWig NAME.bw NAME.bdg  
145 $ awk '{ if ($1 == "chr1" || $1 == "chr2" || $1 == "chr3" || $1 == "chr4" || $1 ==  
146 "chr5" || $1 == "chr6" || $1 == "chr7" || $1 == "chr8" || $1 == "chr9" || $1 ==  
147 "chr10" || $1 == "chr11" || $1 == "chr12" || $1 == "chr13" || $1 == "chr14" || $1 ==  
148 "chr15" || $1 == "chr16" || $1 == "chr17" || $1 == "chr18" || $1 == "chr19" || $1  
149 == "chr20" || $1 == "chr21" || $1 == "chr22" || $1 == "chrX" || $1 == "chrY") {print  
150 $0} }' NAME.bdg > NAME.filtered.bdg
```

151 Preparing genomdata file using genomdata-load (Hoffman et al., 2010):

```
152 $ genomdata-load -t {SAMPLE1}={FILE1} -t {SAMPLE2}={FILE2} ... -s core_regions.fna  
153 mergedload
```

154 The genome data was trained by the segway train (Chan et al., 2017; Hoffman et al., 2012) where the  
155 number of labels (types of characteristic patterns) was defined as 25, also providing the same blacklist  
156 that was used for the U-DNA-Seq data.

```
157 $ SEGWAY_CLUSTER=local segway train mergedload --resolution=100 --num-labels=25 --  
158 minibatch-fraction=0.01 --exclude-coords=blacklist_merged_d500.bed  
159 train25_merged_blacklisted
```

160 Then genomic segments with these labels were identified with segway annotate (Chan et al., 2017;  
161 Hoffman et al., 2012):

```
162 $ SEGWAY_CLUSTER=local segway annotate mergedload train25_merged_blacklisted  
163 Segway_annot_out
```

164 The signal distribution was calculated using Segtools (Buske, Hoffman, Ponts, Le Roch, & Noble, 2011)  
165 and was plotted by Seaborn (Matplotlib modul in python, (Hunter, 2007)) (cf. Figure 4B).

```
166 $ segtools-signal-distribution segway.bed mergedload  
167  
168 import pandas as pd  
169 import seaborn as sb
```

```

170 df = pd.read_csv("Segway norm_data.txt", delimiter="\t")
171 df = df.set_index(df.columns[0])
172 s=sb.heatmap(df,xticklabels=True,yticklabels=True,linewidths=0.5,linecolor="black",c
173 map="RdYlBu_r",annot=False,annot_kws={'size':4})
174 figure = s.get_figure()
175 figure.savefig('plot_v.png', dpi=400)
176 exit()
177

```

178 **Supplementary file 3-table 3: The composition of the genomedata file.**

| {LABEL}       | {FILE}                                                                           |
|---------------|----------------------------------------------------------------------------------|
| WT            | WT HCT116 merged IP vs son.bin100bp.smooth5000.RPGC.ratio.filtered.bdg           |
| NT UGI        | NT UGI HCT116 merged IP vs son.bin100bp.smooth5000.RPGC.ratio.filtered.bdg       |
| NT UGI MMR    | NT UGI HCT116MMR merged IP vs son.bin100bp.smooth5000.RPGC.ratio.filtered.bdg    |
| 5FdUR UGI     | 5FdUR UGI HCT116 merged IP vs son.bin100bp.smooth5000.RPGC.ratio.filtered.bdg    |
| 5FdUR UGI MMR | 5FdUR UGI HCT116MMR merged IP vs son.bin100bp.smooth5000.RPGC.ratio.filtered.bdg |
| RTX UGI       | RTX UGI HCT116 merged IP vs son.bin100bp.smooth5000.RPGC.ratio.filtered.bdg      |
| RTX UGI MMR   | RTX UGI HCT116MMR merged IP vs son.bin100bp.smooth5000.RPGC.ratio.filtered.bdg   |
| EZH2 pT487    | ENCFF011JWE.filtered.wig                                                         |
| H3K79me2      | ENCFF127XQD.filtered.wig                                                         |
| H3K4me3       | ENCFF144ZRX.filtered.wig                                                         |
| ZFX           | ENCFF168KEG.filtered.wig                                                         |
| H3K9ac        | ENCFF187IFT.filtered.wig                                                         |
| H2AFZ         | ENCFF236ZQJ.filtered.wig                                                         |
| TCF7L2        | ENCFF241JHM.filtered.wig                                                         |
| YY1           | ENCFF293WBY.filtered.wig                                                         |
| JUND          | ENCFF415KJH.filtered.wig                                                         |
| H4K20me1      | ENCFF431PNC.filtered.wig                                                         |
| H3K36me3      | ENCFF514ZYW.filtered.wig                                                         |
| H3K9me3       | ENCFF542HPZ.filtered.wig                                                         |
| EZH2          | ENCFF604ZUW.filtered.wig                                                         |
| ZBTB33        | ENCFF616IIZ.filtered.wig                                                         |
| CTFC          | ENCFF620LDT.filtered.wig                                                         |
| H3K4me1       | ENCFF774BWO.filtered.wig                                                         |
| H3K4me2       | ENCFF783QRO.filtered.wig                                                         |
| RNApi12A pS5  | ENCFF794LVU.filtered.wig                                                         |
| H3K9me2       | ENCFF807PSQ.filtered.wig                                                         |
| RNApi12A      | ENCFF856HUR.filtered.wig                                                         |
| H3K27me3      | ENCFF984BVG.filtered.wig                                                         |
| H3K27ac       | ENCFF984WLE.filtered.wig                                                         |
| NT H3K36me3   | NT UGI H3K36me3 ChIP foldChange.bin100bp.RPGC.ratio.filtered.bdg                 |
| RTX H3K36me3  | RTX UGI H3K36me3 ChIP foldChange.bin100bp.RPGC.ratio.filtered.bdg                |

179

180       **References**

- 181       Buske, O. J., Hoffman, M. M., Ponts, N., Le Roch, K. G., & Noble, W. S. (2011). Exploratory analysis of  
182       genomic segmentations with Segtools. *BMC Bioinformatics*, *12*(1), 415.  
183       <https://doi.org/10.1186/1471-2105-12-415>
- 184       Chan, R. C. W., Libbrecht, M. W., Roberts, E. G., Bilmes, J. A., Noble, W. S., & Hoffman, M. M. (2017).  
185       Segway 2.0: Gaussian mixture models and minibatch training. *Bioinformatics*, *34*(4), 669–671.  
186       <https://doi.org/10.1093/bioinformatics/btx603>
- 187       ENCODE Project Consortium. (2012). An integrated encyclopedia of DNA elements in the human  
188       genome. *Nature*, *489*(7414), 57–74. <https://doi.org/10.1038/nature11247>
- 189       Hayden, K. E., Strome, E. D., Merrett, S. L., Lee, H.-R., Rudd, M. K., & Willard, H. F. (2013).  
190       Sequences Associated with Centromere Competency in the Human Genome. *Molecular and*  
191       *Cellular Biology*, *33*(4), 763–772. <https://doi.org/10.1128/MCB.01198-12>
- 192       Hoffman, M. M., Buske, O. J., & Noble, W. S. (2010). The Genomedata format for storing large-scale  
193       functional genomics data. *Bioinformatics (Oxford, England)*, *26*(11), 1458–1459.  
194       <https://doi.org/10.1093/bioinformatics/btq164>
- 195       Hoffman, M. M., Buske, O. J., Wang, J., Weng, Z., Bilmes, J. A., & Noble, W. S. (2012). Unsupervised  
196       pattern discovery in human chromatin structure through genomic segmentation. *Nature Methods*,  
197       *9*(5), 473–476. <https://doi.org/10.1038/nmeth.1937>
- 198       Hunter, J. D. (2007). Matplotlib: A 2D graphics environment. *Computing in Science & Engineering*, *9*(3),  
199       90–95.
- 200       Kuhn, R. M., Haussler, D., & Kent, W. J. (2013). The UCSC genome browser and associated tools.  
201       *Briefings in Bioinformatics*, *14*(2), 144–161. <https://doi.org/10.1093/bib/bbs038>
- 202       Kundaje, A., Meuleman, W., Ernst, J., Bilenky, M., Yen, A., Heravi-Moussavi, A., ... Kellis, M. (2015).  
203       Integrative analysis of 111 reference human epigenomes. *Nature*, *518*(7539), 317–330.  
204       <https://doi.org/10.1038/nature14248>
- 205       Layer, R. M., Pedersen, B. S., DiSera, T., Marth, G. T., Gertz, J., & Quinlan, A. R. (2018). GIGGLE: a  
206       search engine for large-scale integrated genome analysis. *Nature Methods*, *15*(2), 123–126.  
207       <https://doi.org/10.1038/nmeth.4556>
- 208       Mei, S., Qin, Q., Wu, Q., Sun, H., Zheng, R., Zang, C., ... Liu, X. S. (2017). Cistrome Data Browser: a  
209       data portal for CHIP-Seq and chromatin accessibility data in human and mouse. *Nucleic Acids*  
210       *Research*, *45*(D1), D658–D662. <https://doi.org/10.1093/nar/gkw983>
- 211       Ramírez, F., Ryan, D. P., Grüning, B., Bhardwaj, V., Kilpert, F., Richter, A. S., ... Manke, T. (2016).  
212       deepTools2: a next generation web server for deep-sequencing data analysis. *Nucleic Acids*  
213       *Research*, *44*(W1), W160-5. <https://doi.org/10.1093/nar/gkw257>
- 214       Shu, X., Liu, M., Lu, Z., Zhu, C., Meng, H., Huang, S., ... Yi, C. (2018). Genome-wide mapping reveals  
215       that deoxyuridine is enriched in the human centromeric DNA. *Nature Chemical Biology*, *14*(7),  
216       680–687. <https://doi.org/10.1038/s41589-018-0065-9>
- 217       Zerbino, D. R., Achuthan, P., Akanni, W., Amode, M. R., Barrell, D., Bhai, J., ... Flicek, P. (2018).  
218       Ensembl 2018. *Nucleic Acids Research*, *46*(D1), D754–D761. <https://doi.org/10.1093/nar/gkx1098>
- 219
