# Supplementary material for: Genome-wide alterations of uracil distribution patterns in human DNA upon chemotherapeutic treatments
Source: PubMed Central journal article supplement (PMC7505663; doi:10.7554/elife.60498), 2020-09-21
Supplement: elife-60498-supp4.pdf [file elife-60498-supp4.pdf]

## Supplementary file 4

### Genome-wide analysis of uracil-DNA pattern comparing to other genomic features using bedtools annotate

We also wanted to measure colocalization with other genomic features such as cytogenetic bands, coding vs non-coding regions, repeat classes, or replication timing. Data were collected from UCSC Table Browser ((Karolchik et al., 2004) <http://genome.ucsc.edu/cgi-bin/hgTables>), as it is labelled in Supplementary file 4-table 1. These tab delimited text files were rearranged to fulfil the minimum requirements of the bed format, and sub-categories were also selected into separated bed files using awk.

Replication timing data specific for HCT116 cells were obtained from Replication Domain database (Int90617792 and Int97243322, <https://www2.replicationdomain.com/database.php> (Weddington et al., 2008)). From these wiggle files, early, middle and late replicating segments were extracted to bed files as follows:

```
$ awk ' $4 > 2 ' Int90617792.wig > Int90617792_early_RT.bed
$ awk ' $4 < 0 ' Int90617792.wig > Int90617792_neg_RT.wig
$ awk ' $4 > -2 ' Int90617792_neg_RT.wig > Int90617792_late_RT.wig
```

*# Note that awk use ">" for the absolute value of the negative numbers.*

```
$ awk ' $4 > 0 ' Int90617792.wig > Int90617792_pos_RT.wig
$ awk ' $4 <= 2 ' Int90617792_pos_RT.bed > Int90617792_mid_pos_RT.bed
$ awk ' $4 <= -2 ' Int90617792_neg_RT.bed > Int90617792_mid_neg_RT.bed
$ cat Int90617792_mid_pos_RT.bed Int90617792_mid_neg_RT.bed | sort -k1,1 -k2,2n >
Int90617792_mid_RT_sorted.bed
```

*# From this state, the processing steps are the same, as in case of the log2 track derived bed files involving bedtools merge, bigWigAverageOverBed, sort and awk.*

Additional data were collected from Ensembl database (Zerbino et al., 2018): genomic annotations ([ftp://ftp.ensembl.org/pub/release-97/gff3/homo\\_sapiens/Homo\\_sapiens.GRCh38.97.gff3.gz](ftp://ftp.ensembl.org/pub/release-97/gff3/homo_sapiens/Homo_sapiens.GRCh38.97.gff3.gz)) and HCT116 specific regulatory features corresponding to transcriptional activity ([ftp://ftp.ensembl.org/pub/release-97/regulation/homo\\_sapiens/RegulatoryFeatureActivity/HCT116/homo\\_sapiens.GRCh38.HCT116.Regulatory\\_Build.regulatory\\_activity.20190329.gff.gz](ftp://ftp.ensembl.org/pub/release-97/regulation/homo_sapiens/RegulatoryFeatureActivity/HCT116/homo_sapiens.GRCh38.HCT116.Regulatory_Build.regulatory_activity.20190329.gff.gz)). From this latter file, relevant interval files corresponding to different categories (e. g. promoter, enhancer, etc., cf. Supplementary file 4-table 1) were derived as follows:

```
$ awk '{gsub(/\;/, "\t", $9)} {print "chr"$1 "\t" $4 "\t"$5 "\t"$3 "\t" $9}'
homo_sapiens.GRCh38.HCT116.Regulatory_Build.regulatory_activity.20190329.gff >
homo_sapiens.GRCh38.HCT116.Regulatory_Build.regulatory_activity_separated.20190329.gff.bed

$ awk '$5=="activity=ACTIVE" {print $1 "\t" $2 "\t"$3 "\t"$4 "\t" $5}'
homo_sapiens.GRCh38.HCT116.Regulatory_Build.regulatory_activity_separated.20190329.gff.bed
> homo_sapiens.GRCh38.HCT116.Regulatory_Build.regulatory_activity_ACTIVE.20190329.gff.bed
```

```

39 $ awk '$4=="promoter" {print $1 "\t" $2 "\t"$3 "\t"$4 "\t" $5}'
40 homo_sapiens.GRCh38.HCT116.Regulatory_Build.regulatory_activity_ACTIVE.20190329.gff.bed >
41 homo_sapiens.GRCh38.HCT116.Regulatory_Build.regulatory_activity_PROMOTER.20190329.gff.bed

```

42 Data for RNA genes (cf. long non-coding RNAs (lnc\_RNA)) were similarly derived from the  
43 Homo\_sapiens.GRCh38.97.gff3 file.

44 To further access the alpha satellites and the assembled higher order repeat segments (HORs), another  
45 interval file corresponding to the publication (Uralsky et al., 2019) was also downloaded  
46 ([https://genome.ucsc.edu/cgi-](https://genome.ucsc.edu/cgi-bin/hgTrackUi?hgsid=771843343_kD7KrH9deXCkpCCcKNTjvq4t3jOi&c=chr1&g=ct_HMMERSF1HORst281_7253)  
47 [bin/hgTrackUi?hgsid=771843343\\_kD7KrH9deXCkpCCcKNTjvq4t3jOi&c=chr1&g=ct\\_HMMERSF1HORst2](https://genome.ucsc.edu/cgi-bin/hgTrackUi?hgsid=771843343_kD7KrH9deXCkpCCcKNTjvq4t3jOi&c=chr1&g=ct_HMMERSF1HORst281_7253)  
48 [81\\_7253](https://genome.ucsc.edu/cgi-bin/hgTrackUi?hgsid=771843343_kD7KrH9deXCkpCCcKNTjvq4t3jOi&c=chr1&g=ct_HMMERSF1HORst281_7253)).

49 These features often contain too many and/or too large intervals for which, GIGGLE 1.0 (Layer et al., 2018)  
50 was not proved to be efficient (cf. issue #46 <https://github.com/ryanlayer/GIGGLE/issues/46>). Therefore,  
51 bedtools annotate (Quinlan & Hall, 2010) was applied to count the overlaps between the U-DNA-Seq and  
52 the database intervals. The numbers of overlapping bases between each sample and each database  
53 interval file were summarized and scores were calculated according to the following formula:

$$\frac{\text{N}^\circ \text{ of overlapping bases} * 100}{\text{N}^\circ \text{ of bases in sample intervals}} * \frac{\text{N}^\circ \text{ of overlapping bases} * 100}{\text{N}^\circ \text{ of bases in feature intervals}}$$

54

55 A systematic selection of the tested features is shown in Figure 4C, while the results of the full analysis are  
56 provided in Supplementary file 4-table 1. Bedtools annotate was used as follows:

```

57 $ bedtools annotate -names {short names for the database interval files} -both -i
58 NAME.filtered_blacklisted.bin100bp.smooth5k.RPGC.log2.0p2.region.bed -files {list of
59 database interval files} > bedtools_annot.NAME.bed

```

60 # For one representative database interval file, the number of overlapping bases is calculated as follows:

```

61 $ awk -v OFS="\t" '{ $8=$3-$2 } 1' bedtools_annot_NAME.bed | awk '{ ($7=$7*$8) } 1' | awk
62 '{ (sum1 += $7) } END { print sum1 }' > bedtools_annot_NAME_results.csv

```

|                          |                            | WT       | NT_UGI   | NT_UGI<br>MMR | 5FdUR_UGI | 5FdUR_UGI<br>MMR | RTX_UGI  | RTX_UGI<br>MMR |      |
|--------------------------|----------------------------|----------|----------|---------------|-----------|------------------|----------|----------------|------|
|                          | <i>baseNo in intervals</i> | 3.19E+08 | 3.28E+08 | 3.19E+08      | 5.25E+08  | 5.26E+08         | 5.21E+08 | 5.18E+08       |      |
| Protein Gene             | 1.72E+09                   | 4.39E+02 | 4.43E+02 | 4.37E+02      | 8.51E+02  | 8.85E+02         | 1.28E+03 | 1.30E+03       | [1]  |
| INTRON                   | 1.64E+09                   | 4.35E+02 | 4.41E+02 | 4.33E+02      | 7.60E+02  | 8.34E+02         | 1.15E+03 | 1.18E+03       |      |
| EXON                     | 1.46E+08                   | 1.26E+01 | 1.18E+01 | 1.22E+01      | 2.03E+02  | 9.32E+01         | 3.02E+02 | 2.61E+02       |      |
| CDS                      | 3.97E+07                   | 2.83E+00 | 2.72E+00 | 2.78E+00      | 5.60E+01  | 2.16E+01         | 9.35E+01 | 7.71E+01       |      |
| UTR                      | 1.26E+08                   | 1.11E+01 | 1.04E+01 | 1.08E+01      | 1.73E+02  | 7.91E+01         | 2.66E+02 | 2.31E+02       |      |
| RNA genes                | 1.29E+06                   | 1.32E-01 | 1.39E-01 | 1.22E-01      | 1.29E+00  | 5.60E-01         | 1.77E+00 | 1.63E+00       | [2]  |
| srpRNA                   | 2.91E+05                   | 1.68E-02 | 2.13E-02 | 1.66E-02      | 3.64E-01  | 1.31E-01         | 7.31E-01 | 6.66E-01       |      |
| snRNA                    | 3.66E+05                   | 6.43E-02 | 7.33E-02 | 5.83E-02      | 3.40E-01  | 1.27E-01         | 5.98E-01 | 5.87E-01       |      |
| scRNA                    | 1.40E+05                   | 1.15E-02 | 8.90E-03 | 1.04E-02      | 1.60E-01  | 3.76E-02         | 3.58E-01 | 3.02E-01       |      |
| tRNA                     | 1.22E+05                   | 8.10E-03 | 8.89E-03 | 7.80E-03      | 2.12E-01  | 8.63E-02         | 1.26E-01 | 7.26E-02       |      |
| rRNA                     | 2.55E+05                   | 1.59E-02 | 1.36E-02 | 1.36E-02      | 1.79E-01  | 1.14E-01         | 9.26E-02 | 9.40E-02       |      |
| RNA                      | 1.18E+05                   | 2.53E-02 | 2.48E-02 | 2.51E-02      | 6.31E-02  | 7.47E-02         | 5.87E-02 | 7.14E-02       |      |
| lincRNA (colon)          | 2.01E+08                   | 9.81E+01 | 1.03E+02 | 9.69E+01      | 1.23E+02  | 1.83E+02         | 5.78E+01 | 5.77E+01       | [3]  |
| lnc_RNA                  | 1.08E+09                   | 3.51E+02 | 3.61E+02 | 3.49E+02      | 5.16E+02  | 6.25E+02         | 7.12E+02 | 7.15E+02       | [4]  |
| miRNA                    | 3.03E+04                   | 1.99E-03 | 1.77E-03 | 1.86E-03      | 6.51E-02  | 3.24E-02         | 6.72E-02 | 3.78E-02       | [5]  |
| mi_snoRNA                | 1.95E+05                   | 1.81E-02 | 1.67E-02 | 1.54E-02      | 3.33E-01  | 1.53E-01         | 4.47E-01 | 2.88E-01       | [6]  |
| tRNAs                    | 4.68E+04                   | 5.02E-05 | 1.62E-04 | 2.11E-04      | 2.30E-01  | 6.45E-02         | 1.10E-01 | 3.22E-02       | [7]  |
| CpGisland (unmasked)     | 3.36E+07                   | 2.34E-01 | 1.99E-01 | 1.99E-01      | 9.60E+01  | 2.34E+01         | 5.04E+01 | 1.54E+01       | [8]  |
| rmsk_LINE                | 6.72E+08                   | 3.81E+02 | 4.33E+02 | 3.73E+02      | 1.77E+02  | 1.96E+02         | 2.00E+02 | 2.09E+02       | [1]  |
| rmsk_SINE                | 4.17E+08                   | 3.59E+01 | 3.33E+01 | 3.24E+01      | 4.54E+02  | 1.99E+02         | 6.99E+02 | 5.82E+02       |      |
| rmsk_LTR                 | 2.82E+08                   | 3.68E+01 | 3.52E+01 | 3.74E+01      | 1.58E+02  | 2.52E+02         | 9.70E+01 | 1.24E+02       |      |
| rmsk_Retroposon          | 4.54E+06                   | 1.74E-02 | 1.20E-02 | 7.35E-03      | 7.06E+00  | 1.71E+00         | 5.45E+00 | 3.69E+00       |      |
| rmsk_DNA                 | 1.07E+08                   | 4.28E+01 | 4.07E+01 | 4.28E+01      | 5.66E+01  | 6.87E+01         | 5.55E+01 | 6.78E+01       |      |
| rmsk_DNAq                | 4.59E+05                   | 2.81E-01 | 2.74E-01 | 2.95E-01      | 1.21E-01  | 3.25E-01         | 7.61E-02 | 1.11E-01       |      |
| rmsk_Helitron            | 3.81E+05                   | 2.34E-01 | 2.09E-01 | 2.26E-01      | 1.82E-01  | 2.10E-01         | 1.42E-01 | 1.75E-01       |      |
| rmsk_Satellite           | 7.89E+07                   | 3.02E-01 | 2.64E-01 | 3.19E-01      | 1.60E-01  | 6.29E-01         | 7.28E-02 | 5.65E-02       |      |
| rmsk_Simple_repeat       | 3.95E+07                   | 2.39E+01 | 2.31E+01 | 2.30E+01      | 2.67E+01  | 2.40E+01         | 1.97E+01 | 1.37E+01       |      |
| rmsk_Low_complexity      | 6.39E+06                   | 2.31E+00 | 2.33E+00 | 2.07E+00      | 4.81E+00  | 3.69E+00         | 3.53E+00 | 2.36E+00       |      |
| rmsk_Unknown             | 7.53E+05                   | 3.57E-01 | 3.48E-01 | 3.95E-01      | 2.93E-01  | 6.35E-01         | 1.73E-01 | 2.39E-01       |      |
| simpleRepeat             | 1.49E+08                   | 7.15E+00 | 6.71E+00 | 6.83E+00      | 3.48E+01  | 2.33E+01         | 3.64E+01 | 2.24E+01       |      |
| nestedRepeat             | 8.89E+08                   | 3.13E+02 | 3.43E+02 | 3.03E+02      | 4.26E+02  | 3.73E+02         | 4.99E+02 | 4.91E+02       |      |
| microsatellites          | 1.70E+06                   | 8.26E-01 | 8.14E-01 | 7.53E-01      | 1.01E+00  | 9.57E-01         | 9.28E-01 | 8.66E-01       |      |
| centromeres              | 5.95E+07                   | 1.02E-05 | 8.01E-06 | 9.95E-05      | 0.00E+00  | 7.37E-05         | 0.00E+00 | 7.78E-06       |      |
| Satellite_centro_repeats | 7.42E+07                   | 2.76E-04 | 6.25E-05 | 3.74E-04      | 5.89E-03  | 3.64E-02         | 5.27E-04 | 1.14E-03       |      |
| lincRNA_HORs             | 2.04E+07                   | 1.53E-08 | 3.59E-08 | 3.69E-08      | 0.00E+00  | 4.65E-05         | 2.26E-08 | 2.36E-05       |      |
| cytoBand_gneg            | 1.47E+09                   | 1.33E+02 | 1.33E+02 | 1.31E+02      | 1.42E+03  | 1.09E+03         | 1.53E+03 | 1.43E+03       | [13] |
| cytoBand_gpos25          | 2.14E+08                   | 1.07E+01 | 1.07E+01 | 1.07E+01      | 3.05E+02  | 2.10E+02         | 4.21E+02 | 3.65E+02       |      |
| cytoBand_gpos50          | 4.10E+08                   | 6.45E+01 | 6.52E+01 | 6.55E+01      | 2.12E+02  | 3.00E+02         | 1.78E+02 | 2.06E+02       |      |
| cytoBand_gpos75          | 4.11E+08                   | 3.33E+02 | 3.41E+02 | 3.33E+02      | 8.41E+01  | 1.58E+02         | 4.09E+01 | 6.50E+01       |      |
| cytoBand_gpos100         | 4.96E+08                   | 1.07E+03 | 1.12E+03 | 1.07E+03      | 1.86E+01  | 7.19E+01         | 1.00E+01 | 1.41E+01       |      |
| early_RT1                | 5.80E+08                   | 6.03E+00 | 5.37E+00 | 5.16E+00      | 1.85E+03  | 2.70E+02         | 4.04E+03 | 3.43E+03       | [14] |
| early_RT2                | 5.74E+08                   | 5.96E+00 | 5.21E+00 | 5.09E+00      | 1.80E+03  | 2.53E+02         | 4.03E+03 | 3.40E+03       |      |
| middle_RT1               | 1.02E+09                   | 1.66E+02 | 1.65E+02 | 1.65E+02      | 8.64E+02  | 1.87E+03         | 5.10E+01 | 1.77E+02       |      |
| middle_RT2               | 1.03E+09                   | 1.75E+02 | 1.74E+02 | 1.73E+02      | 8.83E+02  | 1.86E+03         | 5.33E+01 | 1.84E+02       |      |
| late_RT1                 | 6.19E+08                   | 5.01E+02 | 5.23E+02 | 5.04E+02      | 1.50E+00  | 1.65E+02         | 1.08E-04 | 2.41E-02       |      |
| late_RT2                 | 6.09E+08                   | 4.85E+02 | 5.01E+02 | 4.87E+02      | 1.76E+00  | 1.79E+02         | 1.14E-04 | 1.69E-02       |      |
| CTCF_bind                | 4.86E+07                   | 3.97E+00 | 3.70E+00 | 4.00E+00      | 9.90E+01  | 5.87E+01         | 8.88E+01 | 7.42E+01       | [15] |
| TF_bind                  | 3.25E+06                   | 3.95E-01 | 3.74E-01 | 3.94E-01      | 4.43E+00  | 3.67E+00         | 3.74E+00 | 3.36E+00       |      |
| ENHANCER                 | 1.25E+06                   | 8.68E-02 | 1.05E-01 | 9.81E-02      | 1.41E+00  | 4.68E-01         | 3.98E+00 | 1.51E+00       |      |
| PROMOTER                 | 2.28E+07                   | 1.05E-01 | 9.87E-02 | 9.53E-02      | 6.50E+01  | 1.51E+01         | 5.58E+01 | 1.82E+01       |      |
| PROMOTER_flank           | 2.48E+07                   | 6.77E-01 | 6.89E-01 | 6.08E-01      | 3.04E+01  | 1.45E+01         | 7.47E+01 | 2.78E+01       |      |
| OPEN                     | 9.71E+04                   | 1.52E-02 | 1.80E-02 | 2.64E-02      | 1.12E-01  | 1.22E-01         | 1.15E-01 | 1.33E-01       |      |
| DNaseHS_HCT116           | 2.35E+07                   | 7.47E-01 | 7.14E-01 | 7.57E-01      | 4.78E+01  | 1.82E+01         | 4.80E+01 | 2.11E+01       |      |
| RegDnaseCluster          | 4.58E+08                   | 4.70E+01 | 4.63E+01 | 4.74E+01      | 6.64E+02  | 4.93E+02         | 6.03E+02 | 5.00E+02       | [17] |

64 **Supplementary file 4-table 1. Full collection of genomic features compared to samples of U-DNA-**  
65 **Seq.** Genomic features were downloaded from the UCSC (Karolchik et al., 2004), the Ensembl (Zerbino et  
66 al., 2018), and the Replication Domain (Weddington et al., 2008) databases. The detailed sources are  
67 indicated in the last column as follows: [1] UCSC, Table Browser: Genes and Gene Predictions / GENCODE  
68 v32 / knownGene, [2] UCSC Table Browser: Repeats / RepeatMasker / rmsk, [3] UCSC Table Browser:  
69 Genes and Gene Predictions / lincRNA RNA-Seq / Colon (lincRNAsCTColon), [4] Ensembl, [5] UCSC Table  
70 Browser: Expression / miRNA Tissue Atlas / sample1 (miRnaAtlasSample1BarChart), [6] UCSC Table  
71 Browser: Genes and Gene Predictions / sno/miRNA / wgRna, [7] UCSC Table Browser: Genes and Gene  
72 Predictions / tRNA Genes / tRNAs, [8] UCSC Table Browser: Regulation / Unmasked CpG /  
73 cpGIslandExtUnmasked, [9] UCSC Table Browser: Repeats / Simple Repeats / simpleRepeat, [10] UCSC  
74 Table Browser: Repeats / Interrupted Rpts / nestedRepeats, [11] UCSC Table Browser: Repeats /  
75 Microsatellite / microsat, [12] UCSC Table Browser: Mapping and Sequencing / Centromeres / centromeres,  
76 [13] UCSC Table Browser: Mapping and Sequencing / Chromosome Band / cytoBand, [14] Replication  
77 Domain Database, [15] Ensembl, regulatory build for HCT116, [16] UCSC Table Browser: Regulation /  
78 DNase HS / HCT-116 Pk (wgEncodeRegDnaseUwHct116Peak), [17] UCSC Table Browser: Regulation /  
79 DNase Clusters / wgEncodeRegDnaseClustered. Higher order repeat segments (HORs) were downloaded  
80 from UCSC (HMMERSF1HORst281top100k.bed, (Uralsky et al., 2019)). Scores were calculated according  
81 the formula given in the text. Abbreviated features are the following: coding sequences (CDS), untranslated  
82 regions (UTR), signal recognition particle RNAs (srpRNA), small nuclear (snRNA), small conditional  
83 (scRNA), long non-coding RNA (lncRNA), long intergenic non-coding RNAs found in colon tissues (lincRNA  
84 (colon)), micro-RNA (miRNA), micro and small nucleolar (mi\_snoRNA) RNAs, short interspersed nuclear  
85 elements (SINE) and long interspersed nuclear elements (LINE), long terminal repeat element (LTR),  
86 putative DNA repeat elements (DNAq), cytological bands stained by Giemsa (cytoBand\_gneg: non-stained,  
87 cytoBand\_pos25 up to pos100: show increasing staining intensity), early, middle and late replication timing  
88 (RT), CCCTC-Binding factor binding sites that might correspond to DNA loops, insulators, chromatin  
89 anchoring point and borders between hetero- and euchromatin (CTCF-binding), opened chromatin  
90 structure (OPEN), DNase hypersensitive sites (DNaseHS), transcription factor binding sites  
91 (TF\_binding\_site).

92

93 Based on the revealed correlation between uracil distribution of non-treated cells and heterochromatin, as  
94 well as between uracil patterns of drug-treated cells and replication timing, AT content and the replication  
95 timing scores were also calculated on the genomic segments provided by the Segway analysis (Figure 4-  
96 figure supplement 3). Average replication timing scores were calculated using both replicates (Int90617792  
97 and Int97243322) available in Replication Domain Database (Weddington et al., 2008). The applied  
98 command lines were the following:

```
99 $ awk '$4==0 {print $0}' segway.bed | sort -k1,1 -k2,2n | awk '{print $1 "\t" $2 "\t"  
100 $3 "\t" NR}' > segway.0_ready.bed
```

101

```
102 $ awk '($2=$2-1) {print $1 "\t" $2 "\t" $3 "\t" $4}' Int90617792.bed >  
103 Int90617792_0start.bed
```

104

```
105 $ awk '($2=$2-1) {print $1 "\t" $2 "\t" $3 "\t" $4}' Int97243322.bed >  
106 Int97243322_0start.bed
```

107

```
108 $ awk '{print $1 "\t" $2 "\t" $3 "\t" NR}' segway.0.RTintersect.bed >  
109 segway.0.RTintersect.ready.bed
```

110

```
111 $ bigWigAverageOverBed -bedOut=segway.0.RTscoreAverage.bed Int90617792.bw
112 segway.0.RTintersect.ready.bed DEL.tab
113
114 $ awk '{{$6=$3-$2}}1' segway.0.RTscoreAverage.bed > segway.0.RTscoreAverage.length.bed
115
116 $ awk '{{$7=$5*$6}}1' segway.0.RTscoreAverage.length.bed >
117 segway.0.RTscoreAverage.averBase.bed
118
119 $ awk '{(sum1 += $7) (sum2 += $6)} END {print (sum1/sum2)}'
120 segway.0.RTscoreAverage.averBase.bed
121
122 $ bedtools nuc -fi refGenome_core_regions.fna -bed segway25.0_ready.bed >
123 segway25.0.nuc.bed
124
125 $ awk '{(sum1+=$7) (sum2+=$10) (sum3+=$8) (sum4+=$9) (sum5+=$11) (sum6+=$12)
126 (sum7+=$13)} END {print sum1 "\t" sum2"\t" sum3 "\t" sum4 "\t" sum5 "\t" sum6 "\t"
127 sum7}' segway25.0.nuc.bed >> segway25.AT_cont_nuc.scoreSumma.csv
```

128 **References**

- 129 Karolchik, D., Hinrichs, A. S., Furey, T. S., Roskin, K. M., Sugnet, C. W., Haussler, D., & Kent, W. J.  
130 (2004). The UCSC Table Browser data retrieval tool. *Nucleic Acids Research*, *32*(90001), 493D–  
131 496. <http://doi.org/10.1093/nar/gkh103>
- 132 Layer, R. M., Pedersen, B. S., DiSera, T., Marth, G. T., Gertz, J., & Quinlan, A. R. (2018). GIGGLE: a  
133 search engine for large-scale integrated genome analysis. *Nature Methods*, *15*(2), 123–126.  
134 <http://doi.org/10.1038/nmeth.4556>
- 135 Quinlan, A. R., & Hall, I. M. (2010). BEDTools: a flexible suite of utilities for comparing genomic features.  
136 *Bioinformatics*, *26*(6), 841–842. <http://doi.org/10.1093/bioinformatics/btq033>
- 137 Uralsky, L. I., Shepelev, V. A., Alexandrov, A. A., Yurov, Y. B., Rogaev, E. I., & Alexandrov, I. A. (2019).  
138 Classification and monomer-by-monomer annotation dataset of suprachromosomal family 1 alpha  
139 satellite higher-order repeats in hg38 human genome assembly. *Data in Brief*, *24*, 103708.  
140 <http://doi.org/10.1016/j.dib.2019.103708>
- 141 Weddington, N., Stuy, A., Hiratani, I., Ryba, T., Yokochi, T., & Gilbert, D. M. (2008). ReplicationDomain: a  
142 visualization tool and comparative database for genome-wide replication timing data. *BMC*  
143 *Bioinformatics*, *9*, 530. <http://doi.org/10.1186/1471-2105-9-530>
- 144 Zerbino, D. R., Achuthan, P., Akanni, W., Amode, M. R., Barrell, D., Bhai, J., ... Flicek, P. (2018).  
145 Ensembl 2018. *Nucleic Acids Research*, *46*(D1), D754–D761. <http://doi.org/10.1093/nar/gkx1098>
- 146
