# Supplementary material for: Genome-wide alterations of uracil distribution patterns in human DNA upon chemotherapeutic treatments
Source: eLife. 2020 Sep 21;9:e60498. doi: 10.7554/eLife.60498 (PMC7505663; doi:10.7554/eLife.60498)
Supplement: Figure 1—figure supplement 1—source data 1. [file elife-60498-fig1-figsupp1-data1.xlsx]

## Sheet: Fig 1-fig suppl 1-source data 1
	HCT116					MMR+ HCT116
UGI expression	transient UGI expr.		stable UGI expr.			stable UGI expr.
treatment	NT	5FdUR	NT	5FdUR	RTX	NT	5FdUR	RTX
	10.2	463.829	1.55588	400.121	575	2.32588	938.459	1003
	8.93453	569.917	0.895865	382.614	621	2.32588	913.355	921
	7.75562	344.774	1.5	550.07	743.592	1.26839	745.268	990.964
	1.5	342.3	1.79514	406.72	625.812	1.60458	861	984.056
	1.4	414.8	1.2849	299.36	823.726	1.49708	904	1016.43
	5.3	360.44	0.636029	287.46	720.261	2.90522	987	849.642
Mean	5.84836	416.01	1.27797	387.724	684.898	1.98784	891.514	960.849
SEM	1.40531	33.1542	0.162629	35.2601	34.8091	0.234254	30.8552	23.727
n	6	6	6	6	6	6	6	6
