# Supplementary material for: Genome-wide alterations of uracil distribution patterns in human DNA upon chemotherapeutic treatments
Source: eLife. 2020 Sep 21;9:e60498. doi: 10.7554/eLife.60498 (PMC7505663; doi:10.7554/eLife.60498)
Supplement: Figure 2—figure supplement 2—source data 1. [file elife-60498-fig2-figsupp2-data1.xlsx]

## Sheet: UHS
mid	counts
100	24921502
300	250
500	98
700	63
900	57
1100	26
1300	25
1500	12
1700	8
1900	14
2100	16
2300	19
2500	23
2700	28
2900	40
3100	31
3300	5
3500	0
3700	0
3900	0
4100	0
4300	0
4500	0
4700	0
4900	0
5100	0
5300	0
5500	0
5700	0
5900	0
6100	0
6300	0
6500	0
6700	0
6900	1
7100	0
7300	0
7500	0
7700	0
7900	0
8100	0
8300	0
8500	0
8700	0
8900	0
9100	0
9300	0
9500	0
9700	0
9900	1
10100	0
10300	0
10500	0
10700	0
10900	0
11100	0
11300	0
11500	0
11700	0
11900	0
12100	0
12300	0
12500	0
12700	0
12900	1
13100	0
13300	0
13500	0
13700	0
13900	0
14100	0
14300	0
14500	0
14700	0
14900	0
15100	0
15300	0
15500	0
15700	0
15900	0
16100	0
16300	1

## Sheet: low mappability
mid	counts
-0.05	23979408
0.05	225209
0.15	208282
0.25	189335
0.35	94341
0.45	75459
0.55	132397
0.65	47215
0.75	102317
0.85	26845
0.95	97436
1.05	84333
1.15	19396
1.25	71046
1.35	58393
1.45	51360
1.55	8130
1.65	39889
1.75	33497
1.85	46070
1.95	19840
2.05	15259
2.15	11528
2.25	15805
2.35	6149
2.45	8196
2.55	5422
2.65	3793
2.75	2728
2.85	2083
2.95	1588
3.05	1678
3.15	1180
3.25	910
3.35	739
3.45	580
3.55	601
3.65	383
3.75	473
3.85	310
3.95	302
4.05	266
4.15	194
4.25	194
4.35	159
4.45	183
4.55	147
4.65	191
4.75	152
4.85	131
4.95	151
5.05	140
5.15	110
5.25	105
5.35	96
5.45	90
5.55	85
5.65	129
5.75	129
5.85	129
5.95	123
6.05	99
6.15	115
6.25	119
6.35	138
6.45	165
6.55	134
6.65	97
6.75	56
6.85	38
6.95	29
7.05	17
7.15	7
7.25	5
7.35	5
7.45	6
7.55	7
7.65	7
7.75	5
7.85	5
7.95	5
8.05	2
8.15	3
8.25	4
8.35	2
8.45	1
8.55	2
8.65	0
8.75	0
8.85	0
8.95	3
9.05	0
9.15	2
9.25	1
9.35	0
9.45	0
9.55	2
9.65	0
9.75	0
9.85	2
9.95	2
10.05	1
10.15	1
10.25	0
10.35	1
10.45	1
