# Supplementary material for: Genome-wide alterations of uracil distribution patterns in human DNA upon chemotherapeutic treatments
Source: eLife. 2020 Sep 21;9:e60498. doi: 10.7554/eLife.60498 (PMC7505663; doi:10.7554/eLife.60498)
Supplement: Figure 3—figure supplement 4—source data 1. [file elife-60498-fig3-figsupp4-data1.xlsx]

## Sheet: WT
mid	counts		threshold:	0.27
-1.69	1
-1.67	0
-1.65	0
-1.63	0
-1.61	0
-1.59	0
-1.57	0
-1.55	1
-1.53	1
-1.51	6
-1.49	15
-1.47	22
-1.45	9
-1.43	16
-1.41	14
-1.39	17
-1.37	9
-1.35	13
-1.33	17
-1.31	27
-1.29	35
-1.27	22
-1.25	33
-1.23	43
-1.21	79
-1.19	120
-1.17	141
-1.15	202
-1.13	334
-1.11	473
-1.09	570
-1.07	743
-1.05	1270
-1.03	1838
-1.01	2655
-0.99	3845
-0.97	5218
-0.95	6890
-0.93	8958
-0.91	11395
-0.89	14927
-0.87	18823
-0.85	24249
-0.83	29908
-0.81	36638
-0.79	44127
-0.77	52227
-0.75	62157
-0.73	74041
-0.71	85363
-0.69	96928
-0.67	108628
-0.65	121946
-0.63	134353
-0.61	148280
-0.59	163100
-0.57	178623
-0.55	195077
-0.53	211059
-0.51	228668
-0.49	246026
-0.47	266819
-0.45	287042
-0.43	309041
-0.41	332749
-0.39	356766
-0.37	382326
-0.35	405646
-0.33	433818
-0.31	463814
-0.29	492377
-0.27	523178
-0.25	552805
-0.23	583339
-0.21	610094
-0.19	641156
-0.17	669989
-0.15	696682
-0.13	721986
-0.11	742854
-0.09	763736
-0.07	780658
-0.05	792076
-0.03	803043
-0.01	825052
0.01	821805
0.03	797918
0.05	787129
0.07	771803
0.09	753060
0.11	733166
0.13	707647
0.15	678065
0.17	642056
0.19	607960
0.21	571491
0.23	533600
0.25	491259
0.27	450767
0.29	408703
0.31	367865
0.33	329393
0.35	294323
0.37	257026
0.39	223696
0.41	194263
0.43	165867
0.45	140464
0.47	117396
0.49	97614
0.51	80363
0.53	64930
0.55	52397
0.57	41488
0.59	32756
0.61	25171
0.63	19247
0.65	14395
0.67	10309
0.69	7617
0.71	5757
0.73	4174
0.75	3043
0.77	2108
0.79	1485
0.81	1098
0.83	860
0.85	585
0.87	423
0.89	286
0.91	249
0.93	230
0.95	205
0.97	119
0.99	125
1.01	117
1.03	89
1.05	112
1.07	79
1.09	60
1.11	65
1.13	77
1.15	68
1.17	34
1.19	42
1.21	17
1.23	16
1.25	19
1.27	14
1.29	16
1.31	18
1.33	9
1.35	17
1.37	19
1.39	10
1.41	12
1.43	9
1.45	12
1.47	2
1.49	9
1.51	4
1.53	6
1.55	3
1.57	7
1.59	7
1.61	7
1.63	10
1.65	15
1.67	5
1.69	4
1.71	4
1.73	6
1.75	3
1.77	5
1.79	2
1.81	9
1.83	7
1.85	6
1.87	6
1.89	8
1.91	6
1.93	7
1.95	4
1.97	7
1.99	12
2.01	8
2.03	9
2.05	14
2.07	11
2.09	4
2.11	5
2.13	2
2.15	2
2.17	4
2.19	4
2.21	5
2.23	6
2.25	1
2.27	0
2.29	1
2.31	0
2.33	1
2.35	0
2.37	2
2.39	5
2.41	6
2.43	4
2.45	2
2.47	6
2.49	2
2.51	3
2.53	1
2.55	0
2.57	0
2.59	0
2.61	0
2.63	0
2.65	0
2.67	0
2.69	0
2.71	0
2.73	0
2.75	0
2.77	0
2.79	0
2.81	0
2.83	0
2.85	1
2.87	0
2.89	0
2.91	0
2.93	0
2.95	1

## Sheet: NT_UGI
mid	counts		threshold:	0.33
-1.93	1
-1.91	0
-1.89	0
-1.87	0
-1.85	0
-1.83	0
-1.81	0
-1.79	1
-1.77	0
-1.75	1
-1.73	1
-1.71	3
-1.69	2
-1.67	8
-1.65	8
-1.63	5
-1.61	2
-1.59	8
-1.57	18
-1.55	12
-1.53	19
-1.51	16
-1.49	21
-1.47	18
-1.45	18
-1.43	21
-1.41	33
-1.39	59
-1.37	80
-1.35	141
-1.33	245
-1.31	311
-1.29	348
-1.27	493
-1.25	549
-1.23	818
-1.21	1253
-1.19	1526
-1.17	2017
-1.15	2540
-1.13	3193
-1.11	4224
-1.09	5264
-1.07	6779
-1.05	8593
-1.03	10805
-1.01	13515
-0.99	16404
-0.97	20437
-0.95	24633
-0.93	28612
-0.91	33746
-0.89	40451
-0.87	46617
-0.85	52899
-0.83	60788
-0.81	68383
-0.79	77458
-0.77	86379
-0.75	95092
-0.73	104158
-0.71	114207
-0.69	125337
-0.67	135308
-0.65	146504
-0.63	156845
-0.61	167583
-0.59	180812
-0.57	193351
-0.55	206750
-0.53	219818
-0.51	234084
-0.49	248950
-0.47	265731
-0.45	282423
-0.43	299633
-0.41	319736
-0.39	339691
-0.37	358642
-0.35	380980
-0.33	400916
-0.31	423205
-0.29	441151
-0.27	467991
-0.25	490652
-0.23	512463
-0.21	533360
-0.19	556484
-0.17	580288
-0.15	601183
-0.13	620429
-0.11	638470
-0.09	657259
-0.07	672734
-0.05	686693
-0.03	700515
-0.01	722643
0.01	728361
0.03	707437
0.05	696965
0.07	689301
0.09	679765
0.11	669014
0.13	655120
0.15	638669
0.17	618688
0.19	600186
0.21	576732
0.23	549530
0.25	522385
0.27	496913
0.29	465641
0.31	433448
0.33	402294
0.35	373564
0.37	342807
0.39	311250
0.41	280187
0.43	253213
0.45	224804
0.47	199609
0.49	175643
0.51	152395
0.53	132066
0.55	112379
0.57	95662
0.59	80850
0.61	67649
0.63	56018
0.65	46008
0.67	37181
0.69	30013
0.71	23529
0.73	18748
0.75	14765
0.77	10969
0.79	8568
0.81	6637
0.83	5081
0.85	3656
0.87	2816
0.89	1903
0.91	1449
0.93	1102
0.95	801
0.97	579
0.99	410
1.01	323
1.03	280
1.05	216
1.07	149
1.09	130
1.11	94
1.13	80
1.15	69
1.17	64
1.19	82
1.21	55
1.23	53
1.25	48
1.27	53
1.29	37
1.31	32
1.33	49
1.35	45
1.37	30
1.39	32
1.41	30
1.43	38
1.45	36
1.47	37
1.49	27
1.51	17
1.53	16
1.55	18
1.57	18
1.59	11
1.61	6
1.63	7
1.65	10
1.67	10
1.69	5
1.71	7
1.73	5
1.75	7
1.77	1
1.79	4
1.81	4
1.83	3
1.85	7
1.87	12
1.89	4
1.91	6
1.93	3
1.95	4
1.97	5
1.99	4
2.01	10
2.03	2
2.05	5
2.07	12
2.09	7
2.11	6
2.13	3
2.15	2
2.17	4
2.19	3
2.21	5
2.23	10
2.25	12
2.27	8
2.29	6
2.31	6
2.33	7
2.35	7
2.37	1
2.39	1
2.41	1
2.43	2
2.45	4
2.47	2
2.49	2
2.51	15
2.53	3
2.55	3
2.57	4
2.59	2
2.61	3

## Sheet: NT_UGI_MMR
mid	counts		threshold:	0.29
-1.81	12
-1.79	5
-1.77	4
-1.75	24
-1.73	18
-1.71	12
-1.69	12
-1.67	17
-1.65	9
-1.63	8
-1.61	8
-1.59	10
-1.57	11
-1.55	14
-1.53	11
-1.51	6
-1.49	16
-1.47	14
-1.45	14
-1.43	16
-1.41	25
-1.39	55
-1.37	62
-1.35	71
-1.33	138
-1.31	149
-1.29	249
-1.27	239
-1.25	365
-1.23	544
-1.21	777
-1.19	1183
-1.17	1650
-1.15	2053
-1.13	2709
-1.11	3500
-1.09	4312
-1.07	5413
-1.05	6743
-1.03	8312
-1.01	10408
-0.99	12948
-0.97	16127
-0.95	19510
-0.93	23693
-0.91	28755
-0.89	34060
-0.87	40857
-0.85	47965
-0.83	55427
-0.81	65417
-0.79	73514
-0.77	83784
-0.75	92729
-0.73	103020
-0.71	113595
-0.69	124356
-0.67	136345
-0.65	145628
-0.63	157842
-0.61	171893
-0.59	184333
-0.57	197348
-0.55	211509
-0.53	225776
-0.51	239796
-0.49	257321
-0.47	274082
-0.45	291254
-0.43	308888
-0.41	327344
-0.39	348220
-0.37	368853
-0.35	389115
-0.33	412953
-0.31	437065
-0.29	461380
-0.27	487612
-0.25	513508
-0.23	541641
-0.21	567672
-0.19	593644
-0.17	620886
-0.15	643241
-0.13	665364
-0.11	688271
-0.09	709986
-0.07	726775
-0.05	741808
-0.03	752531
-0.01	778371
0.01	776500
0.03	757781
0.05	750370
0.07	739911
0.09	729309
0.11	711214
0.13	687694
0.15	665157
0.17	637178
0.19	609797
0.21	579940
0.23	544915
0.25	509465
0.27	471208
0.29	434681
0.31	398095
0.33	359439
0.35	323319
0.37	287019
0.39	253925
0.41	224607
0.43	193843
0.45	167555
0.47	143502
0.49	120399
0.51	100595
0.53	83609
0.55	68822
0.57	56100
0.59	44653
0.61	35247
0.63	27502
0.65	21336
0.67	16122
0.69	12242
0.71	8987
0.73	6521
0.75	4879
0.77	3622
0.79	2585
0.81	1813
0.83	1375
0.85	890
0.87	638
0.89	530
0.91	353
0.93	243
0.95	207
0.97	176
0.99	164
1.01	115
1.03	91
1.05	76
1.07	80
1.09	73
1.11	86
1.13	64
1.15	73
1.17	69
1.19	60
1.21	64
1.23	51
1.25	38
1.27	36
1.29	36
1.31	29
1.33	12
1.35	27
1.37	31
1.39	11
1.41	8
1.43	6
1.45	11
1.47	4
1.49	7
1.51	4
1.53	6
1.55	3
1.57	8
1.59	13
1.61	5
1.63	10
1.65	12
1.67	9
1.69	10
1.71	3
1.73	9
1.75	5
1.77	11
1.79	11
1.81	10
1.83	3
1.85	2
1.87	2
1.89	1
1.91	1
1.93	0
1.95	0
1.97	3
1.99	1
2.01	3
2.03	6
2.05	12
2.07	8
2.09	4
2.11	12
2.13	25
2.15	7
2.17	4
2.19	4
2.21	4
2.23	6
2.25	3
2.27	3
2.29	0
2.31	0
2.33	0
2.35	0
2.37	0
2.39	0
2.41	1
2.43	0
2.45	0
2.47	1
2.49	0
2.51	0
2.53	0
2.55	1
2.57	3
2.59	4
2.61	4
2.63	3
2.65	3
2.67	4
2.69	1
2.71	1
2.73	3
2.75	3
2.77	0
2.79	0
2.81	0
2.83	1
2.85	0
2.87	1
2.89	0
2.91	1
2.93	0
2.95	0
2.97	0
2.99	1
