# Supplementary material for: Genome-wide alterations of uracil distribution patterns in human DNA upon chemotherapeutic treatments
Source: eLife. 2020 Sep 21;9:e60498. doi: 10.7554/eLife.60498 (PMC7505663; doi:10.7554/eLife.60498)
Supplement: Figure 3—source data 1. [file elife-60498-fig3-data1.xlsx]

## Sheet: 5FdUR_UGI
mid	counts		threshold:	0.18
-0.97	4
-0.95	30
-0.93	64
-0.91	114
-0.89	217
-0.87	333
-0.85	571
-0.83	934
-0.81	1482
-0.79	2289
-0.77	3442
-0.75	5350
-0.73	7801
-0.71	10599
-0.69	14288
-0.67	19406
-0.65	25213
-0.63	32941
-0.61	41870
-0.59	53265
-0.57	66556
-0.55	80874
-0.53	100333
-0.51	123682
-0.49	149676
-0.47	179265
-0.45	216348
-0.43	260480
-0.41	312048
-0.39	372456
-0.37	440252
-0.35	516301
-0.33	597140
-0.31	681014
-0.29	769295
-0.27	846444
-0.25	918120
-0.23	970500
-0.21	1008900
-0.19	1033858
-0.17	1041400
-0.15	1030568
-0.13	1009659
-0.11	970439
-0.09	927519
-0.07	876898
-0.05	823135
-0.03	774639
-0.01	739269
0.01	682979
0.03	624170
0.05	584301
0.07	546314
0.09	514717
0.11	489556
0.13	464674
0.15	444222
0.17	424848
0.19	406936
0.21	389588
0.23	372849
0.25	356762
0.27	340481
0.29	322992
0.31	305893
0.33	289581
0.35	272239
0.37	252749
0.39	234302
0.41	216789
0.43	198101
0.45	178401
0.47	160903
0.49	143298
0.51	125023
0.53	109320
0.55	95484
0.57	81597
0.59	69604
0.61	59192
0.63	49797
0.65	42248
0.67	34828
0.69	28234
0.71	22962
0.73	17800
0.75	14091
0.77	10828
0.79	7896
0.81	6271
0.83	4747
0.85	3297
0.87	2366
0.89	1590
0.91	1170
0.93	854
0.95	579
0.97	369
0.99	298
1.01	167
1.03	132
1.05	82
1.07	30
1.09	19
1.11	7
1.13	6
1.15	2

## Sheet: 5FdUR_UGI_MMR
mid	counts		threshold:	0.14
-1.03	2
-1.01	6
-0.99	4
-0.97	4
-0.95	2
-0.93	4
-0.91	8
-0.89	10
-0.87	13
-0.85	12
-0.83	39
-0.81	83
-0.79	115
-0.77	185
-0.75	222
-0.73	317
-0.71	589
-0.69	880
-0.67	1160
-0.65	1632
-0.63	2620
-0.61	4004
-0.59	5941
-0.57	8219
-0.55	11121
-0.53	15520
-0.51	21086
-0.49	27889
-0.47	36934
-0.45	48151
-0.43	63595
-0.41	82176
-0.39	106012
-0.37	135402
-0.35	172231
-0.33	216031
-0.31	270658
-0.29	335461
-0.27	411477
-0.25	495063
-0.23	591417
-0.21	688550
-0.19	788331
-0.17	889199
-0.15	984941
-0.13	1075385
-0.11	1155018
-0.09	1217784
-0.07	1265857
-0.05	1296409
-0.03	1313994
-0.01	1337255
0.01	1301548
0.03	1249805
0.05	1194588
0.07	1125210
0.09	1052198
0.11	972822
0.13	894237
0.15	808103
0.17	720450
0.19	634729
0.21	553672
0.23	475191
0.25	404189
0.27	339019
0.29	280388
0.31	230855
0.33	188340
0.35	150153
0.37	117575
0.39	90651
0.41	69925
0.43	52518
0.45	39252
0.47	28784
0.49	20535
0.51	14029
0.53	9704
0.55	6591
0.57	4220
0.59	2534
0.61	1549
0.63	879
0.65	553
0.67	296
0.69	130
0.71	94
0.73	17
0.75	6
0.77	1

## Sheet: RTX_UGI
mid	counts		threshold:	0.25
-1.43	10
-1.41	9
-1.39	14
-1.37	14
-1.35	4
-1.33	21
-1.31	21
-1.29	17
-1.27	2
-1.25	10
-1.23	5
-1.21	3
-1.19	11
-1.17	24
-1.15	27
-1.13	34
-1.11	45
-1.09	49
-1.07	40
-1.05	71
-1.03	81
-1.01	79
-0.99	127
-0.97	234
-0.95	312
-0.93	317
-0.91	333
-0.89	505
-0.87	491
-0.85	578
-0.83	707
-0.81	970
-0.79	1318
-0.77	1520
-0.75	2071
-0.73	3023
-0.71	4703
-0.69	6663
-0.67	9981
-0.65	14348
-0.63	20960
-0.61	30032
-0.59	43960
-0.57	62057
-0.55	87573
-0.53	118794
-0.51	158065
-0.49	206119
-0.47	263304
-0.45	331260
-0.43	407889
-0.41	487228
-0.39	575286
-0.37	660400
-0.35	749509
-0.33	820882
-0.31	884565
-0.29	935727
-0.27	973284
-0.25	990987
-0.23	986555
-0.21	969697
-0.19	934766
-0.17	893544
-0.15	843725
-0.13	788336
-0.11	727916
-0.09	673319
-0.07	621518
-0.05	577974
-0.03	540833
-0.01	527180
0.01	492775
0.03	452989
0.05	431140
0.07	415539
0.09	401774
0.11	389998
0.13	379855
0.15	368681
0.17	362113
0.19	355411
0.21	350144
0.23	346926
0.25	343487
0.27	337826
0.29	332043
0.31	326847
0.33	320136
0.35	314208
0.37	308738
0.39	300528
0.41	287752
0.43	277134
0.45	263293
0.47	246918
0.49	231675
0.51	215632
0.53	197266
0.55	178441
0.57	158195
0.59	139914
0.61	119237
0.63	101404
0.65	85647
0.67	69726
0.69	55050
0.71	42618
0.73	32853
0.75	24677
0.77	18080
0.79	12701
0.81	9023
0.83	6213
0.85	4094
0.87	2701
0.89	1729
0.91	1036
0.93	674
0.95	443
0.97	264
0.99	139
1.01	49
1.03	20
1.05	7
1.07	0
1.09	2
1.11	0
1.13	0
1.15	2
1.17	0
1.19	0
1.21	0
1.23	0
1.25	0
1.27	0
1.29	0
1.31	0
1.33	0
1.35	0
1.37	0
1.39	1
1.41	0
1.43	1
1.45	0
1.47	0
1.49	0
1.51	0
1.53	1
1.55	0
1.57	0
1.59	0
1.61	0
1.63	0
1.65	0
1.67	0
1.69	0
1.71	0
1.73	0
1.75	0
1.77	0
1.79	0
1.81	0
1.83	0
1.85	0
1.87	0
1.89	0
1.91	0
1.93	0
1.95	0
1.97	0
1.99	0
2.01	0
2.03	0
2.05	0
2.07	0
2.09	0
2.11	0
2.13	0
2.15	0
2.17	0
2.19	0
2.21	0
2.23	0
2.25	0
2.27	0
2.29	0
2.31	0
2.33	0
2.35	0
2.37	0
2.39	0
2.41	0
2.43	0
2.45	0
2.47	0
2.49	0
2.51	0
2.53	0
2.55	0
2.57	0
2.59	0
2.61	0
2.63	0
2.65	0
2.67	0
2.69	0
2.71	0
2.73	0
2.75	0
2.77	0
2.79	0
2.81	0
2.83	0
2.85	0
2.87	0
2.89	0
2.91	0
2.93	0
2.95	0
2.97	0
2.99	0
3.01	0
3.03	0
3.05	0
3.07	0
3.09	0
3.11	1
3.13	0
3.15	0
3.17	0
3.19	0
3.21	0
3.23	0
3.25	1

## Sheet: RTX_UGI_MMR
mid	counts		threshold:	0.26
-1.49	8
-1.47	4
-1.45	11
-1.43	2
-1.41	3
-1.39	2
-1.37	3
-1.35	3
-1.33	0
-1.31	2
-1.29	2
-1.27	2
-1.25	0
-1.23	3
-1.21	13
-1.19	13
-1.17	3
-1.15	4
-1.13	25
-1.11	71
-1.09	85
-1.07	106
-1.05	163
-1.03	230
-1.01	243
-0.99	328
-0.97	380
-0.95	361
-0.93	511
-0.91	583
-0.89	666
-0.87	967
-0.85	1266
-0.83	1583
-0.81	2018
-0.79	2697
-0.77	3990
-0.75	5387
-0.73	7399
-0.71	10903
-0.69	15370
-0.67	21403
-0.65	29327
-0.63	39680
-0.61	53725
-0.59	69860
-0.57	93600
-0.55	120879
-0.53	154919
-0.51	194164
-0.49	240371
-0.47	291350
-0.45	349169
-0.43	410580
-0.41	470335
-0.39	529204
-0.37	586588
-0.35	640678
-0.33	687596
-0.31	725750
-0.29	755887
-0.27	777106
-0.25	786327
-0.23	789166
-0.21	783049
-0.19	769569
-0.17	752188
-0.15	730128
-0.13	708871
-0.11	686402
-0.09	661753
-0.07	637033
-0.05	614908
-0.03	595646
-0.01	594171
0.01	570377
0.03	541831
0.05	527387
0.07	517342
0.09	509092
0.11	502528
0.13	492557
0.15	488334
0.17	485497
0.19	481969
0.21	476473
0.23	471874
0.25	468970
0.27	460039
0.29	448929
0.31	437508
0.33	421904
0.35	405943
0.37	383739
0.39	362003
0.41	337373
0.43	308863
0.45	277359
0.47	246972
0.49	215749
0.51	184166
0.53	154474
0.55	128826
0.57	103351
0.59	82126
0.61	62631
0.63	47524
0.65	35206
0.67	25068
0.69	16996
0.71	11389
0.73	7468
0.75	4681
0.77	2952
0.79	1670
0.81	882
0.83	505
0.85	291
0.87	175
0.89	93
0.91	76
0.93	66
0.95	32
0.97	8
