# Supplementary material for: Genome-wide alterations of uracil distribution patterns in human DNA upon chemotherapeutic treatments
Source: eLife. 2020 Sep 21;9:e60498. doi: 10.7554/eLife.60498 (PMC7505663; doi:10.7554/eLife.60498)
Supplement: Figure 4—figure supplement 3—source data 1. [file elife-60498-fig4-figsupp3-data1.xlsx]

## Sheet: RepTiming_&_AT_content
	Replication timing score (the higher the earlier)	deviation of Replication timing scores	AT-content (%)		length		Replication timing scores from Int90617792	Replication timing scores from Int97243322
0	2.291	0.04802	47.17		90000000		2.33893	2.24289
1	-2.871	-0.08252	65.19		200000000		-2.95306	-2.78803
2	-1.769	0.00842	65.61		300000000		-1.76071	-1.77754
3	3.666	-0.04042	51.11		80000000		3.62511	3.70594
4	-1.053	0.03112	52.85		100000000		-1.02178	-1.08402
5	1.136	-0.00171	58.14		100000000		1.13449	1.13792
6	-1.839	0.01313	60.04		200000000		-1.82588	-1.85213
7	-2.016	0.02829	57.46		200000000		-1.98778	-2.04435
8	3.227	-0.00835	59.31		70000000		3.21903	3.23574
9	-1.646	0.00062	54.04		100000000		-1.64564	-1.64688
10	1.521	0.00579	64.5		90000000		1.5267	1.51511
11	-1.768	-0.04095	62.49		200000000		-1.8093	-1.72741
12	1.732	0.01705	63.62		100000000		1.74952	1.71543
13	0.759	0.01957	54.19		90000000		0.77868	0.73954
14	3.162	-0.01074	48.68		40000000		3.15083	3.1723
15	3.515	0.0071	55.65		100000000		3.52168	3.50748
16	-1.214	0.01555	61.96		200000000		-1.19865	-1.22974
17	0.919	0.02226	58.15		100000000		0.94161	0.89709
18	-1.927	-0.01638	68.36		100000000		-1.94288	-1.91012
19	3.75	-0.02005	47.59		50000000		3.72977	3.76986
20	2.406	-0.00235	57.63		90000000		2.40406	2.40876
21	2.726	-0.01545	42.01		30000000		2.71037	2.74127
22	4.171	-0.05631	47.39		70000000		4.11444	4.22706
23	1.173	-0.00157	58.48		40000000		1.17192	1.17506
24	-2.976	-0.01859	60.61		200000000		-2.99505	-2.95787
		--					--	--
