# Supplementary material for: Genome-wide alterations of uracil distribution patterns in human DNA upon chemotherapeutic treatments
Source: eLife. 2020 Sep 21;9:e60498. doi: 10.7554/eLife.60498 (PMC7505663; doi:10.7554/eLife.60498)
Supplement: Figure 4—source data 1. [file elife-60498-fig4-data1.xlsx]

## Sheet: Figure 4-source data 1
	WT	NT_UGI	NT_UGI_MMR	5FdUR_UGI	5FdUR_UGI_MMR	RTX_UGI	RTX_UGI_MMR	file_size	database	DB identifier/filename
NT_UGI_H3K36me3	-516.224	-533.242	-558.088	228.031	-72.7977	668.239	481.588	91328	own data	-
RTX_UGI_H3K36me3	-395.021	-415.202	-421.676	179.08	-155.627	811.735	573.1	104132	own data	-
H3K36me3	-499.467	-519.179	-502.537	208.654	105.782	837.83	634.081	100000	Roadm. Epi.	E075-H3K36me3.narrowPeak.bed.gz
H3K36me3	-397.676	-414.378	-409.188	97.0619	-23.5436	771.328	645.07	100000	Roadm. Epi.	E106-H3K36me3.narrowPeak.bed.gz
H3K36me3	-328.962	-341.331	-339.197	122.731	6.34595	740.859	615.352	100000	Roadm. Epi.	E076-H3K36me3.narrowPeak.bed.gz
H3K36me3	-261.289	-269.31	-272.34	48.5503	8.68743	717.136	599.438	72341	ENCODE	ENCFF029GQD.bed.gz
H3K36me3	-186.558	-188.525	-190.744	44.8286	-164.035	530.248	502.221	43916	Ensemble	homo_sapiens.GRCh38.HCT116.H3K36me3.ccat_histone.peaks.20190329.mergedd1000.bed.gz
H3K36me3	-202.007	-207.272	-206.036	182.691	32.7711	491.264	419.896	100000	Roadm. Epi.	E076-H3K36me3.broadPeak.bed.gz
H3K36me3	-246.233	-251.328	-250.539	191.129	106.727	492.806	416.404	100000	Roadm. Epi.	E075-H3K36me3.broadPeak.bed.gz
H3K36me3	-194.029	-198.698	-203.162	77.6534	-0.258715	462.076	439.613	100000	Roadm. Epi.	E106-H3K36me3.broadPeak.bed.gz
H3K36me3	-35.1303	-44.1545	-36.9791	2.73124	-22.2957	137.813	32.1252	563	Cistrome	51149, 51164
H3K4me1	-1067.62	-1119.78	-1058.08	573.3	28.6088	718.447	331.756	100000	Roadm. Epi.	E075-H3K4me1.narrowPeak.bed.gz
H3K4me1	-457.713	-477.343	-463.665	438.166	ND	712.238	290.822	100000	ENCODE	ENCFF986BGX.bed.gz
H3K4me1	-446.221	-456.445	-449.308	331.521	6.681	629.813	185.52	99735	Ensemble	homo_sapiens.GRCh38.HCT116.H3K4me1.ccat_histone.peaks.20190329.bed.gz
H3K4me1	-417.982	-426.292	-419.39	445.522	90.1959	590.55	246.19	100000	Cistrome	83177
H3K4me1	-588.191	-613.823	-602.574	442.302	119.884	578.706	263.226	100000	Cistrome	70068
H3K4me1	-442.59	-463.068	-448.394	333.822	ND	575.684	186.555	82838	ENCODE	ENCFF963BLP.bed.gz
H3K4me1	-421.038	-435.654	-421.109	417.828	93.6565	553.903	232.925	100000	Cistrome	101556
H3K4me1	-458.476	-479.061	-464.434	401.243	52.5084	550.311	180.454	97772	Cistrome	74630
H3K4me1	-399.694	-412.568	-399.44	431.797	98.7969	553.199	229.905	100000	Cistrome	85458
H3K4me1	-494.175	-504.108	-493.005	470.225	133.629	543.76	214.412	97947	Cistrome	51161
H3K4me1	-597.613	-621.276	-608.226	433.21	81.0325	538.417	210.025	87601	Cistrome	82750
H3K4me1	-543.442	-548.622	-531.404	428.528	62.2215	571.128	416.833	100000	Roadm. Epi.	E075-H3K4me1.broadPeak.bed.gz
H3K4me1	-464.115	-479.04	-465.882	424.413	105.587	519.152	207.007	100000	Cistrome	82751
H3K4me1	-445.473	-467.636	-448.488	428.675	116.266	513.95	226.942	100000	Cistrome	82748
H3K4me1	-569.964	-600.946	-591.141	430.146	116.851	525.094	238.587	86089	Cistrome	70076
H3K4me1	-611.91	-639.361	-621.046	353.545	-202.546	516.487	306.037	100000	Roadm. Epi.	E106-H3K4me1.narrowPeak.bed.gz
H3K4me1	-451.353	-468.884	-458.855	414.6	99.3793	518.291	230.79	88273	Cistrome	70075
H3K4me1	-449.825	-467.434	-453.355	393.01	91.8244	504.391	219.581	91410	Cistrome	70067
H3K4me1	-360.238	-371.431	-360.537	400.663	110.618	496.101	215.914	100000	Cistrome	88015
H3K4me1	-344.659	-358.455	-349.089	403.302	112.536	488.64	226.521	100000	Cistrome	88811
H3K4me1	-465.897	-485.372	-474.617	383.666	66.6839	494.509	196.092	78930	Cistrome	9246
H3K4me1	-432.877	-448.895	-433.602	321.176	0.0343313	485.129	337.084	100000	Roadm. Epi.	E106-H3K4me1.broadPeak.bed.gz
H3K4me1	-409.066	-418.787	-415.929	388.952	103.848	476.713	198.258	86738	Cistrome	84634
H3K4me1	-334.779	-367.741	-356.603	270.172	-0.900887	482.34	257.14	79205	Cistrome	57095
H3K4me1	-557.676	-576.312	-565.557	454.81	123.946	474.865	194.338	48818	Cistrome	51145
H3K4me1	-917.802	-918.972	-902.681	467.502	63.2062	442.277	145.298	37547	Cistrome	42909
H3K4me1	-509.321	-516.692	-516.48	365.259	64.8183	434.952	194.617	41288	Cistrome	101557
H3K4me1	-673.319	-714.684	-691.183	431.73	164.187	422.774	199.324	29827	Cistrome	42908
H3K4me1	-351.948	-335.699	-334.269	395.684	20.0324	418.618	73.984	4238	Cistrome	72104
H3K4me1	-407.628	-423.622	-398.279	268.783	6.53343	391.786	256.33	100000	Roadm. Epi.	E076-H3K4me1.narrowPeak.bed.gz
H3K4me1	-464.383	-525.97	-466.011	398.31	26.252	406.611	90.0449	4839	Cistrome	72106
H3K4me1	-468.982	-485.704	-486.492	370.502	112.44	402.005	172.563	47917	Cistrome	88979
H3K4me1	-622.315	-647.31	-643.095	403.69	1.70188	380.101	76.1885	35174	Cistrome	86455
H3K4me1	-263.993	-271.046	-255.906	270.292	65.6797	375.737	276.416	100000	Roadm. Epi.	E076-H3K4me1.broadPeak.bed.gz
H3K4me1	-282.074	-291.691	-287.333	265.851	12.0048	350.035	174.35	34853	Cistrome	101558
H3K4me1	-31.0848	-45.8145	-36.415	87.3501	3.52448	86.5806	11.1355	567	Cistrome	84587
H3K4me1	-63.0738	-55.0825	-53.3042	16.5209	-0.312525	54.2727	2.29671	422	Cistrome	45270
H3K27ac	-775.488	-814.983	-777.147	467.762	153.963	587.325	309.702	100000	Roadm. Epi.	E075-H3K27ac.narrowPeak.bed.gz
H3K27ac	-819.754	-856.924	-821.765	436.31	109.508	575.046	314.187	100000	Roadm. Epi.	E106-H3K27ac.narrowPeak.bed.gz
H3K27ac	-464.029	-473.204	-474.62	278.859	-497.808	580.61	209.911	45508	ENCODE	ENCFF349LKU.bed.gz
H3K27ac	-529.974	-544.724	-540.8	322.645	-7.54667	528.825	129.752	40985	ENCODE	ENCFF083ADY.bed.gz
H3K27ac	-470.103	-474.254	-465.84	364.564	164.529	521.816	382.92	100000	Roadm. Epi.	E075-H3K27ac.broadPeak.bed.gz
H3K27ac	-534.997	-552.97	-536.71	344.06	103.815	515.931	374.639	100000	Roadm. Epi.	E106-H3K27ac.broadPeak.bed.gz
H3K27ac	-558.195	-583.119	-551.394	370.527	109.652	482.553	267.073	100000	Roadm. Epi.	E076-H3K27ac.narrowPeak.bed.gz
H3K27ac	-610.419	-615.611	-617.625	361.654	-3.89896	450.53	53.7138	57085	Cistrome	61965
H3K27ac	-569.599	-570.195	-576.535	281.143	-4.31487	460.824	2.85644	14808	Ensemble	homo_sapiens.GRCh38.HCT116.H3K27ac.SWEmbl_R0005.peaks.20190329.bed.gz
H3K27ac	-472.37	-476.743	-466.743	396.74	28.2684	450.124	135.805	67892	Cistrome	66813
H3K27ac	-499.306	-505.123	-508.372	318.135	-5.73291	437.293	89.2428	50049	Cistrome	66991
H3K27ac	-478.796	-488.648	-483.023	294.054	-18.6285	429.292	116.182	36552	Cistrome	101737
H3K27ac	-564.619	-564.241	-566.814	362.395	-0.212841	417.426	26.3143	51101	Cistrome	83014
H3K27ac	-546.509	-553.012	-560.154	315.448	-12.7558	413.098	13.8953	45759	Cistrome	45272
H3K27ac	-447.048	-450.72	-453.921	309.982	-3.49864	414.207	79.3281	49495	Cistrome	66992
H3K27ac	-480.084	-486.494	-484.503	306.555	-8.26462	411.212	44.4596	42374	Cistrome	66993
H3K27ac	-450.741	-454.232	-449.855	299.299	-2.5165	402.38	41.8239	41740	Cistrome	85866
H3K27ac	-291.766	-295.478	-282.995	267.791	120.133	422.183	333.879	100000	Roadm. Epi.	E076-H3K27ac.broadPeak.bed.gz
H3K27ac	-587.572	-623.851	-611.509	280.825	-18.8829	392.127	3.35489	35902	Cistrome	61942
H3K27ac	-558.062	-557.589	-573.091	256.15	-82.1476	390.644	0.477649	22363	Cistrome	101739
H3K27ac	-496.947	-504.151	-503.794	326.376	-0.81457	388.565	40.9735	39573	Cistrome	83018
H3K27ac	-661.227	-667.156	-675.942	298.769	-25.898	380.375	0.326658	36874	Cistrome	62110
H3K27ac	-670.984	-674.907	-678.264	247.103	-154.808	378.703	-0.663499	23506	Cistrome	61940
H3K27ac	-631.668	-641.32	-636.249	289.736	-22.6429	376.533	0.910527	35218	Cistrome	62112
H3K27ac	-466.894	-479.269	-463.791	340.227	0.401072	384.731	57.8019	45825	Cistrome	85293
H3K27ac	-703.946	-693.41	-765.929	200.775	-40.5356	379.048	2.12492	4400	Cistrome	85867
H3K27ac	-558.896	-532.311	-571.308	240.325	-108.635	379.185	0.00143615	24442	Cistrome	61939
H3K27ac	-689.612	-695.196	-694.19	300.597	-40.1479	375.992	0.0516905	32883	Cistrome	62109
H3K27ac	-499.729	-509.635	-511.285	336.309	0.00198776	380.673	33.3746	38279	Cistrome	85283
H3K27ac	-390.949	-398.303	-395.154	271.334	-0.21541	379.85	62.6235	44200	Cistrome	82335
H3K27ac	-723.352	-702.866	-724.711	334.603	-35.4961	367.574	0.0461529	25172	Cistrome	66757
H3K27ac	-753.188	-747.007	-756.792	253.961	-132.741	365.242	0.0154561	11136	Cistrome	66393
H3K27ac	-600.312	-582.376	-599.333	265.106	-100.074	365.208	-0.372558	20517	Cistrome	42163
H3K27ac	-373.15	-377.106	-377.485	284.951	0.213229	372.387	105.924	50279	Cistrome	82334
H3K27ac	-637.232	-656.408	-650.777	279.419	-42.5483	363.362	0.0372688	30630	Cistrome	62111
H3K27ac	-530.576	-536.912	-528.954	343.572	-0.542155	371.636	5.78991	5418	Cistrome	51146
H3K27ac	-859.79	-819.152	-830.354	302.95	-93.2823	359.788	0.000490381	15455	Cistrome	81343
H3K27ac	-660.373	-651.965	-667.932	297.46	-75.896	360.439	0.162148	16665	Cistrome	81342
H3K27ac	-499.706	-496.664	-501.449	275.184	-8.41791	365.663	3.41825	34708	Cistrome	84767
H3K27ac	-438.376	-434.924	-441.3	265.951	-1.14699	362.325	25.3979	42466	Cistrome	88909
H3K27ac	-542.879	-530.97	-560.302	300.415	-33.4227	359.631	0.0504654	22842	Cistrome	81344
H3K27ac	-787.24	-797.277	-785.226	284.978	-81.1148	356.746	-0.0333512	13243	Cistrome	81345
H3K27ac	-592.265	-577.338	-610.194	269.143	-93.4415	351.175	-0.0186318	21201	Cistrome	66394
H3K27ac	-614.968	-632.561	-623.248	294.489	-1.93708	359.931	3.26334	35090	Cistrome	49529
H3K27ac	-756.585	-740.263	-727.846	251.811	-47.7682	354.472	7.1869e-05	7375	Cistrome	84766
H3K27ac	-494.75	-481.822	-498.743	241.681	-37.4099	351.245	-1.14058	24024	Cistrome	61941
H3K27ac	-555.121	-558.158	-574.08	257.169	-66.6186	345.01	-0.0901166	21349	Cistrome	66395
H3K27ac	-485.068	-472.312	-495.776	265.832	-8.5465	354.323	16.0331	16412	Cistrome	83017
H3K27ac	-763.695	-728.006	-746.108	273.305	-62.8547	349.279	-0.0703597	12964	Cistrome	81347
H3K27ac	-526.313	-560.097	-571.295	292.682	-26.1295	346.518	2.47052	22907	Cistrome	57096
H3K27ac	-499.53	-511.487	-502.31	277.28	-2.86699	347.403	19.6856	20922	Cistrome	87277
H3K27ac	-510.662	-504.487	-508.566	296.635	-0.246635	346.276	0.440268	33159	Cistrome	42164
H3K27ac	-570.798	-566.897	-566.449	274.358	-3.03741	350.955	15.5275	12793	Cistrome	87276
H3K27ac	-736.345	-729.862	-732.709	259.289	-50.6069	336.794	-0.169073	13255	Cistrome	85454
H3K27ac	-624.306	-621.516	-624.783	260.554	-31.7282	335.732	-0.0263071	13528	Cistrome	81346
H3K27ac	-716.253	-762.994	-748.015	291.288	-4.1243	335.817	0.00120322	23025	Cistrome	49530
H3K27ac	-494.07	-501.524	-499.672	278.001	-5.95347	336.608	0.454018	25411	Cistrome	85455
H3K27ac	-351.948	-361.396	-395.23	230.41	-3.24755	319.64	6.5467	6904	Cistrome	87275
H3K27ac	-611.24	-621.62	-615.76	258.643	-3.89116	282.079	1.93715	7309	Cistrome	87281
H3K27ac	-112.562	-80.8951	-88.9255	-3.35767	-0.330022	-21.7433	-79.9351	876	Cistrome	67551
H3K9ac	-781.01	-791.549	-785.636	539.806	330.571	674.817	281.993	100000	Roadm. Epi.	E075-H3K9ac.narrowPeak.bed.gz
H3K9ac	-416.441	-424.861	-422.554	372.352	270.187	540.083	360.783	100000	Roadm. Epi.	E075-H3K9ac.broadPeak.bed.gz
H3K9ac	-596.859	-613.292	-604.636	348.969	157.893	509.952	125.007	36097	ENCODE	ENCFF724JXS.bed.gz
H3K9ac	-546.13	-544.938	-553.228	367.315	-0.554368	417.851	25.9386	49287	Cistrome	87280
H3K9ac	-501.441	-516.795	-492.613	349.863	363.828	426.16	227.386	60918	Roadm. Epi.	E076-H3K9ac.narrowPeak.bed.gz
H3K9ac	-722.466	-733.009	-726.107	353.767	-11.2249	408.785	14.8844	32466	Cistrome	100642
H3K9ac	-566.88	-567.575	-580.402	362.364	-1.72762	393.601	12.7133	44150	Cistrome	87279
H3K9ac	-687.915	-687.531	-697.398	334.158	-22.4182	392.51	4.18369	29925	Cistrome	100641
H3K9ac	-515.327	-520.395	-522.538	356.618	-0.0363768	391.345	52.1894	40603	Cistrome	87278
H3K9ac	-568.737	-581.392	-577.799	369.207	0.221799	376.712	41.9658	40039	Cistrome	87273
H3K9ac	-510.333	-511.059	-523.416	328.929	0.0677191	337.354	41.1773	24383	Cistrome	82746
H3K9ac	-535.524	-529.184	-539.21	312.957	-0.0368329	335.585	37.173	18541	Cistrome	87272
H3K9ac	-156.175	-152.227	-148.12	199.06	219.4	354.655	285.256	100000	Roadm. Epi.	E076-H3K9ac.broadPeak.bed.gz
H3K9ac	-621.715	-643.603	-623.826	315.643	-0.495604	318.014	13.1945	20226	Cistrome	82747
H3K9ac	-835.843	-856.965	-847.584	337.668	-0.779066	297.975	2.9748	13135	Cistrome	82745
H3K9ac	-649.084	-677.514	-657.74	278.005	-1.28745	284.838	5.14666	5854	Cistrome	82744
H3K4me3	-762.423	-792.439	-772.304	481.092	111.723	509.187	212.187	84678	Roadm. Epi.	E075-H3K4me3.narrowPeak.bed.gz
H3K4me3	-607.291	-628.311	-618.914	384.924	159.57	437.008	96.8258	31924	ENCODE	ENCFF023MGT.bed.gz
H3K4me3	-861.653	-900.135	-870.078	406.499	335.451	422.725	15.6943	26743	ENCODE	ENCFF575AUU.bed.gz
H3K4me3	-454.84	-463.05	-452.858	368.661	98.7143	443.063	275.084	100000	Roadm. Epi.	E075-H3K4me3.broadPeak.bed.gz
H3K4me3	-1000.06	-1107.09	-1034.02	392.465	ND	403.811	17.1016	17658	Ensemble	homo_sapiens.GRCh38.HCT116.H3K4me3.SWEmbl_R0005.peaks.20190329.bed.gz
H3K4me3	-929.434	-946.703	-898.212	396.663	-1.54477	384.128	10.8454	26517	Cistrome	51144
H3K4me3	-793.341	-813.457	-794.215	397.426	-0.810191	379.938	2.68811	34446	Cistrome	45271
H3K4me3	-877.503	-892.065	-887.392	391.151	3.27294	372.208	2.16142	31205	Cistrome	92369
H3K4me3	-476.927	-485.104	-476.896	365.134	5.22937	373.831	62.2456	48602	Cistrome	85292
H3K4me3	-663.791	-686.293	-672.683	378.129	0.155488	377.193	18.0362	33338	Cistrome	102153
H3K4me3	-854.821	-830.966	-816.813	381.708	-4.34003	369.897	1.78969	29334	Cistrome	42912
H3K4me3	-590.425	-600.547	-596.268	361.012	-0.00265508	374.514	27.9609	31737	Cistrome	102154
H3K4me3	-890.337	-906.209	-871.271	397.158	-4.77134	366.73	0.815372	30486	Cistrome	42161
H3K4me3	-951.842	-974.786	-943.628	390.302	-5.76946	368.926	0.724517	28373	Cistrome	89284
H3K4me3	-876.521	-903.521	-866.95	387.554	-1.52766	367.881	2.27369	29898	Cistrome	92368
H3K4me3	-976.061	-996.982	-973.718	386.608	-5.81786	368.101	0.831425	27614	Cistrome	89285
H3K4me3	-1105.79	-1139.3	-1089.02	386.179	-8.59848	367.719	0.719928	25156	Cistrome	42913
H3K4me3	-841.76	-868.234	-848.67	391.805	-1.1091	371.543	2.97185	26578	Cistrome	81264
H3K4me3	-966.01	-1123.66	-1388.19	246.564	-17.3149	370.413	7.42005	2983	Cistrome	81266
H3K4me3	-840.61	-854.409	-827.116	378.902	-3.17325	366.18	3.41316	24080	Cistrome	88713
H3K4me3	-1124.93	-1201.82	-1134.88	376.655	-10.9203	362.645	2.205	19739	Cistrome	88725
H3K4me3	-1027.51	-1086.06	-1039.8	378.205	-8.51235	358.266	2.58897	20453	Cistrome	88698
H3K4me3	-987.508	-1024.74	-989.673	388.197	-10.2252	352.581	0.111796	27726	Cistrome	42160
H3K4me3	-1004.31	-1066.44	-1018.94	397.059	-4.96079	353.776	0.204427	27346	Cistrome	81633
H3K4me3	-611.565	-640.482	-656.171	385.573	2.88558	368.815	50.6799	39820	Cistrome	51160
H3K4me3	-998.373	-1042.26	-1009.55	396.77	-6.96555	351.134	0.179491	26055	Cistrome	56017
H3K4me3	-1169.55	-1234.04	-1235.97	391.8	-6.37762	353.383	0.06723	22478	Cistrome	57094
H3K4me3	-1059	-1075.97	-1081.16	391.458	-4.53826	353.936	0.103697	25236	Cistrome	81265
H3K4me3	-1014.26	-1060.93	-1032.95	415.795	0.76481	360.362	15.8174	27993	Cistrome	42162
H3K4me3	-959.627	-1009.06	-958.027	388.766	-7.82524	350.688	0.366353	25988	Cistrome	56016
H3K4me3	-768.776	-779.894	-771.067	373.981	-3.2687	352.92	3.51297	22224	Cistrome	88697
H3K4me3	-1188.35	-1247.57	-1184.93	334.946	-43.4135	350.49	0.42931	16524	Cistrome	70064
H3K4me3	-1053.62	-1081.78	-1083.22	392.224	-7.29003	343.008	0.0445544	24912	Cistrome	81625
H3K4me3	-876.884	-915.882	-893.643	398.185	-1.10557	345.568	0.313367	25654	Cistrome	56019
H3K4me3	-1073.82	-1174.41	-1082.65	357.463	-18.8708	347.545	0.48333	18426	Cistrome	70071
H3K4me3	-1174.03	-1239.41	-1157.52	334.249	-40.8176	341.319	0.247848	16204	Cistrome	70063
H3K4me3	-1078.51	-1140.46	-1079.68	365.967	-18.5647	344.766	0.16327	17739	Cistrome	85447
H3K4me3	-1054.09	-1148.61	-1046.3	376.715	-15.5586	344.868	0.301477	19186	Cistrome	85451
H3K4me3	-907.393	-889.705	-858.959	327.55	-80.5	336.046	1.89799	19549	Cistrome	38319
H3K4me3	-907.393	-889.705	-858.959	327.55	-80.5	336.046	1.89799	19549	Cistrome	8440
H3K4me3	-1176.42	-1234.74	-1155.58	363.753	-21.4911	338.592	0.301567	19113	Cistrome	81635
H3K4me3	-1143.38	-1179.98	-1129.95	355.221	-19.2887	342.4	0.215887	19410	Cistrome	70072
H3K4me3	-1176.53	-1219.35	-1136.67	357.397	-26.204	341.909	0.193906	16561	Cistrome	85449
H3K4me3	-530.83	-546.037	-530.066	359.578	138.834	356.513	168.127	72243	Roadm. Epi.	E076-H3K4me3.narrowPeak.bed.gz
H3K4me3	-1234.7	-1254.26	-1188.5	340.703	-56.7005	333.155	0.0167325	18978	Cistrome	72103
H3K4me3	-1248.34	-1268.69	-1274.49	346.269	-38.2856	336.605	0.0984192	15522	Cistrome	85446
H3K4me3	-1196.11	-1226.9	-1185.59	350.632	-30.9917	334.525	0.0465648	16408	Cistrome	85452
H3K4me3	-1137.1	-1223.86	-1128.21	361.19	-24.3092	334.597	0.015383	17932	Cistrome	85453
H3K4me3	-1053.03	-1067.94	-1035.84	335.911	-55.9222	328.999	0.0415456	15627	Cistrome	72105
H3K4me3	-1229.78	-1222.53	-1201.33	341.973	-39.5405	333.492	0.0870823	15943	Cistrome	85448
H3K4me3	-1248.98	-1267.78	-1236.74	354.523	-29.1164	332.286	0.0195101	16383	Cistrome	85450
H3K4me3	-975.861	-1000.27	-946.672	379.674	-8.99881	324.351	0.000499361	23519	Cistrome	56018
H3K4me3	-863.512	-860.888	-853.828	346.065	-12.5684	322.332	2.06236	21480	Cistrome	38321
H3K4me3	-660.351	-687.975	-693.677	317.159	-28.8343	317.424	2.5191	17967	Cistrome	49532
H3K4me3	-409.05	-425.755	-411.258	245.445	172.486	280.281	114.657	68861	Roadm. Epi.	E106-H3K4me3.narrowPeak.bed.gz
H3K4me3	-271.458	-277.322	-267.125	237.328	130.62	285.944	201.083	100000	Roadm. Epi.	E076-H3K4me3.broadPeak.bed.gz
H3K4me3	-147.185	-149.234	-142.462	132.505	1.05857	223.552	151.161	100000	Roadm. Epi.	E106-H3K4me3.broadPeak.bed.gz
SP1	-1040.61	-1141.5	-1112.32	597.59	225.727	500.856	232.538	82625	Cistrome	5395
SP1	-441.672	-443.346	-438.749	391.466	110.177	427.267	173.049	72471	Cistrome	46215
SP1	-525.687	-524.247	-531.965	324.293	10.8775	401.009	66.7706	34242	Ensemble	homo_sapiens.GRCh38.HCT116.SP1.SWEmbl_R0005.peaks.20190329.bed.gz
SP1	-1147.54	-1179	-1125.38	420.638	0.124408	387.603	23.2914	21322	Cistrome	70813
SP1	-1078.51	-1143.4	-1125.57	452.451	11.9211	386.591	44.3057	24694	Cistrome	70811
SP1	-1255.11	-1387.01	-1295.65	438.172	0.153067	381.993	10.1169	19784	Cistrome	70812
SP1	-433.671	-462.838	-467.213	415.52	172.789	376.012	218.038	100000	Cistrome	70814
SP1	-557.138	-581.874	-592.543	421.5	39.3343	304.122	15.1655	30938	Cistrome	70815
SP1	-455.885	-494.765	-508.279	346.855	82.031	297.656	119.767	46179	Cistrome	70816
TCF7L2	-428.413	-417.732	-409.854	357.099	88.7672	340.004	103.358	45234	Cistrome	45714
TCF7L2	-472.754	-460.226	-457.647	328.173	-133.654	323.171	3.10296	20454	ENCODE	ENCFF199EHQ.bed.gz
TCF7L2	-461.669	-449.99	-446.826	327.955	-5.6408	314.055	0.809801	15431	ENCODE	ENCFF736EVD.bed.gz
TCF7L2	-347.639	-280.291	-252.642	290.432	272.621	288.734	-0.0247173	4946	Ensemble	homo_sapiens.GRCh38.HCT116.TCF7L2.SWEmbl_R0005.peaks.20190329.bed.gz
H3K27me3	-779.262	-818.085	-799.49	730.353	116.078	484.442	267.494	100000	Roadm. Epi.	E075-H3K27me3.narrowPeak.bed.gz
H3K27me3	-580.487	-607.802	-590.128	507.155	106.919	313.703	199.561	65497	Roadm. Epi.	E076-H3K27me3.narrowPeak.bed.gz
H3K27me3	-395.096	-452.721	-388.109	57.0684	-0.0850618	227.651	12.1889	2705	Cistrome	51162
H3K27me3	-405.272	-410.222	-403.08	367.627	135.132	272.84	218.193	100000	Roadm. Epi.	E075-H3K27me3.broadPeak.bed.gz
H3K27me3	-485.553	-509.66	-497.789	468.991	3.87363	229.587	171.855	100000	Roadm. Epi.	E106-H3K27me3.narrowPeak.bed.gz
H3K27me3	-281.112	-293.465	-283.937	281.041	115.298	174.659	148.842	100000	Roadm. Epi.	E076-H3K27me3.broadPeak.bed.gz
H3K27me3	-232.893	-234.78	-231.664	194.546	11.0349	66.8584	96.4889	100000	Roadm. Epi.	E106-H3K27me3.broadPeak.bed.gz
H3K27me3	-65.5178	-57.504	-64.191	42.456	0.307529	30.4326	1.57456	699	Cistrome	51147
H3K27me3	-159.139	-155.791	-154.042	103.105	ND	-168.732	-76.104	199001	Ensemble	homo_sapiens.GRCh38.HCT116.H3K27me3.ccat_histone.peaks.20190329.mergedd1000.bed.gz
H3K27me3	-279.515	-289.543	-281.135	-31.4406	104.228	-341.42	-244.933	100000	ENCODE	ENCFF806AYM.bed.gz
H2AZ/H2AFZ	-411.815	-422.49	-414.559	443.685	105.681	375.901	226.598	16633	Cistrome	100929
H2AZ/H2AFZ	-463.457	-475.489	-484.775	469.118	199.343	341.498	201.561	12876	Cistrome	100930
H2AZ/H2AFZ	151.717	162.184	150.917	407.308	-5.20523	329.753	182.464	70941	ENCODE	ENCFF549VEQ.bed.gz
H2AZ/H2AFZ	-569.252	-589.315	-576.534	418.168	65.9533	423.6	150.098	56439	Cistrome	84716
H2AZ/H2AFZ	-523.194	-541.851	-534.208	414.823	82.313	416.97	140.787	59933	Cistrome	84715
H2AZ/H2AFZ	-72.2879	-83.4644	-81.9432	411.384	149.533	352.136	143.167	100000	Cistrome	83065
H2AZ/H2AFZ	-735.176	-819.404	-799.792	460.523	81.2104	352.422	91.6086	16374	Cistrome	84720
H2AZ/H2AFZ	-923.82	-943.501	-954.415	436.986	1.30878	318.12	2.47012	3440	Cistrome	84719
H2AZ/H2AFZ	-915.765	-931.068	-997.585	457.485	23.1228	322.705	17.7507	9478	Cistrome	84717
H2AZ/H2AFZ	3.44392	4.99866	2.27762	374.728	143.797	294.682	120.541	100000	Cistrome	88446
H3K9me2	-646.119	-707.201	-690.415	522.24	273.229	332.645	211.868	16338	Cistrome	85108
H3K9me2	-0.563942	-0.30944	-0.190939	0.614894	7.47177	0.0239384	-0.0434921	1493	Cistrome	54504
H3K9me2	290.703	334.862	323.014	-0.977246	-10.9144	-3.67924	-0.0168432	4735	ENCODE	ENCFF045ELD.bed.gz
H3K9me2	-107.347	-96.9065	-66.3699	-97.3813	-46.354	-132.303	-142.839	612	Cistrome	93700
H3K9me2	-109.635	-84.8465	-68.2181	-108.343	-50.5676	-199.981	-215.503	726	Cistrome	93701
H3K9me3	-11.0006	-14.8855	-7.55935	-43.0855	-27.2113	-25.0094	-38.8099	471	Cistrome	51148
H3K9me3	-32.1098	-26.8284	-25.2054	-57.6946	-34.5069	-55.5948	-119.502	715	Cistrome	51163
H3K9me3	-17.0546	-14.8055	-15.1046	4.53528	-10.3661	-45.7042	-63.0138	100000	Roadm. Epi.	E075-H3K9me3.broadPeak.bed.gz
H3K9me3	2.21969	8.47564	1.91424	-0.306606	-93.1809	-103.081	-83.6548	100000	Roadm. Epi.	E076-H3K9me3.broadPeak.bed.gz
H3K9me3	-50.215	-20.6218	-42.4108	-17.9018	-113.195	-122.39	-56.028	64003	Roadm. Epi.	E076-H3K9me3.narrowPeak.bed.gz
H3K9me3	-169.025	-180.365	-180.108	-4.7712	-81.7613	-185.558	-162.816	100000	Roadm. Epi.	E075-H3K9me3.narrowPeak.bed.gz
H3K9me3	85.1563	94.9741	86.9743	-146.056	-63.4373	-248.253	-203.997	100000	Roadm. Epi.	E106-H3K9me3.broadPeak.bed.gz
H3K9me3	-31.2492	-38.6278	-44.5676	-233.897	0.00740644	-329.235	-245.541	100000	Roadm. Epi.	E106-H3K9me3.narrowPeak.bed.gz
H3K9me3	198.115	208.76	199.841	-407.068	ND	-420.405	-383.133	116955	Ensemble	homo_sapiens.GRCh38.HCT116.H3K9me3.ccat_histone.peaks.20190329.mergedd1000.bed.gz
H3K9me3	312.509	327.609	329.698	-664.087	120.977	-644.987	-611.433	100000	ENCODE	ENCFF580MMU.bed.gz
