# Supplementary material for: Genome-wide alterations of uracil distribution patterns in human DNA upon chemotherapeutic treatments
Source: eLife. 2020 Sep 21;9:e60498. doi: 10.7554/eLife.60498 (PMC7505663; doi:10.7554/eLife.60498)
Supplement: Figure 4—source data 2. [file elife-60498-fig4-data2.xlsx]

## Sheet: Segway_signal_distribution
label	trackname	mean	sd	n
24	ZFX	0.790853	0.407377	180036041
24	YY1	0.413516	0.910922	180035392
24	H3K27ac	0.370747	0.356901	180035929
24	JUND	0.344766	0.43914	180036031
24	EZH2	0.648162	0.424452	180035929
24	H2AFZ	0.419442	0.393848	180035626
24	RTX_UGI_MMR	0.796248	0.0661727	180036097
24	5FdUR_UGI_MMR	0.952005	0.0723057	180036097
24	NT_UGI_MMR	0.990104	0.0833475	180036097
24	H3K4me3	0.667732	0.429131	180035939
24	H3K4me2	0.337567	0.268617	180035926
24	H3K4me1	0.4532	0.284113	180035921
24	RNApol2A_pS5	0.197509	0.382784	180035392
24	H3K9me2	0.591397	0.412629	180035909
24	H3K9me3	1.88284	0.928747	180035929
24	CTFC	0.659386	1.001	180035781
24	RTX_UGI	0.786306	0.0570653	180036097
24	NT_UGI	0.998644	0.0888181	180036097
24	ZBTB33	0.563232	0.773699	180035392
24	EZH2_pT487	0.737086	0.442141	180035926
24	H3K27me3	0.604173	0.470581	180035747
24	H3K79me2	0.40678	0.379802	178783893
24	H3K9ac	0.463525	0.342601	180035728
24	RTX_UGI_H3K36me3	0.896954	0.336222	178309547
24	NT_UGI_H3K36me3	1.03954	0.456073	178309547
24	5FdUR_UGI	0.862134	0.0720457	180036097
24	H3K36me3	0.770658	0.529141	180035931
24	H4K20me1	0.552636	0.438521	180035757
24	RNApol2A	0.686675	1.32664	180033986
24	WT	0.982988	0.080009	180036097
24	TCF7L2	0.555926	1.6963	180036087
20	ZFX	0.798051	0.459834	86284227
20	YY1	0.414259	0.82911	86283229
20	H3K27ac	0.381583	0.408323	86283414
20	JUND	0.53059	0.553813	86284504
20	EZH2	0.416526	0.362023	86283465
20	H2AFZ	0.43081	0.466482	86283836
20	RTX_UGI_MMR	1.21801	0.130903	86285800
20	5FdUR_UGI_MMR	0.965909	0.102939	86285800
20	NT_UGI_MMR	0.998226	0.0914555	86285800
20	H3K4me3	0.282428	0.284727	86283463
20	H3K4me2	0.243608	0.262994	86283780
20	H3K4me1	0.363103	0.338208	86283407
20	RNApol2A_pS5	0.424179	0.638589	86283445
20	H3K9me2	0.519679	0.437464	86283636
20	H3K9me3	0.397389	0.392618	86283885
20	CTFC	0.399434	0.759032	86282424
20	RTX_UGI	1.19792	0.153941	86285800
20	NT_UGI	1.01589	0.0958844	86285800
20	ZBTB33	0.455607	0.655465	86282445
20	EZH2_pT487	0.442671	0.36805	86283788
20	H3K27me3	0.335168	0.367827	86283715
20	H3K79me2	0.586651	0.759144	86120199
20	H3K9ac	0.358114	0.327255	86283287
20	RTX_UGI_H3K36me3	1.58211	0.749301	83753864
20	NT_UGI_H3K36me3	1.52318	0.741836	83753864
20	5FdUR_UGI	1.01516	0.153737	86285800
20	H3K36me3	0.668724	0.679368	86282681
20	H4K20me1	0.538847	0.48322	86283705
20	RNApol2A	0.379179	0.934789	86280998
20	WT	1.00222	0.0874551	86285800
20	TCF7L2	0.337576	0.740102	86280918
21	ZFX	2.66582	3.77144	26070200
21	YY1	5.1495	10.4879	26070200
21	H3K27ac	12.6613	12.7947	26070200
21	JUND	0.828751	0.713545	26070200
21	EZH2	0.680094	0.551412	26070200
21	H2AFZ	1.73979	1.50405	26070200
21	RTX_UGI_MMR	1.03588	0.150779	26070200
21	5FdUR_UGI_MMR	0.938081	0.131185	26070200
21	NT_UGI_MMR	0.73431	0.131008	26070200
21	H3K4me3	22.8802	15.4195	26070200
21	H3K4me2	18.9423	8.59844	26070200
21	H3K4me1	3.81567	3.92404	26070200
21	RNApol2A_pS5	9.54519	12.0881	26070200
21	H3K9me2	0.456943	0.373018	26070200
21	H3K9me3	0.339667	0.305243	26070200
21	CTFC	2.70747	9.40155	26070200
21	RTX_UGI	1.12128	0.184827	26070200
21	NT_UGI	0.7244	0.134207	26070200
21	ZBTB33	1.96411	3.4885	26070200
21	EZH2_pT487	0.63602	0.476984	26070200
21	H3K27me3	0.384089	0.369446	26070200
21	H3K79me2	3.89588	5.05721	26051180
21	H3K9ac	17.351	13.4416	26070200
21	RTX_UGI_H3K36me3	1.1748	0.547077	25891591
21	NT_UGI_H3K36me3	1.1136	0.565732	25891591
21	5FdUR_UGI	1.08507	0.18848	26070200
21	H3K36me3	0.727955	0.838799	26070200
21	H4K20me1	0.802941	0.730286	26070200
21	RNApol2A	5.12681	8.55201	26070200
21	WT	0.753688	0.123536	26070200
21	TCF7L2	6.68192	14.0085	26070200
22	ZFX	0.923636	0.389477	68232500
22	YY1	0.931417	1.52126	68232500
22	H3K27ac	0.77082	0.678483	68232500
22	JUND	0.509927	0.377048	68232500
22	EZH2	0.672062	0.469309	68232500
22	H2AFZ	0.561847	0.575865	68232500
22	RTX_UGI_MMR	1.21276	0.140756	68232500
22	5FdUR_UGI_MMR	0.900186	0.105422	68232500
22	NT_UGI_MMR	0.644104	0.0721178	68232500
22	H3K4me3	0.484163	0.4324	68232500
22	H3K4me2	0.644407	0.625579	68232500
22	H3K4me1	1.06634	0.900523	68232500
22	RNApol2A_pS5	1.11731	1.50301	68232500
22	H3K9me2	0.541398	0.428172	68232500
22	H3K9me3	0.498539	0.446859	68232500
22	CTFC	1.09532	4.58633	68232500
22	RTX_UGI	1.32294	0.162996	68232500
22	NT_UGI	0.644244	0.075289	68232500
22	ZBTB33	0.836335	0.913576	68232500
22	EZH2_pT487	0.624062	0.429122	68232500
22	H3K27me3	0.616274	0.586406	68232500
22	H3K79me2	0.538086	0.640928	68098428
22	H3K9ac	0.780464	0.523238	68232500
22	RTX_UGI_H3K36me3	1.45135	0.556943	67973919
22	NT_UGI_H3K36me3	1.4861	0.630449	67973919
22	5FdUR_UGI	1.11218	0.169303	68232500
22	H3K36me3	0.716435	0.621935	68232500
22	H4K20me1	0.644731	0.502348	68232500
22	RNApol2A	0.691993	1.61873	68232500
22	WT	0.674736	0.0691307	68232500
22	TCF7L2	0.949332	2.10569	68232500
23	ZFX	0.6795	0.50435	35486288
23	YY1	1.37635	2.70655	35485900
23	H3K27ac	4.22213	6.09386	35485900
23	JUND	1.35217	1.69256	35485900
23	EZH2	0.749479	0.492509	35485900
23	H2AFZ	1.77003	1.49921	35485900
23	RTX_UGI_MMR	1.01359	0.163673	35979515
23	5FdUR_UGI_MMR	0.991208	0.118015	35979515
23	NT_UGI_MMR	0.965334	0.130435	35979515
23	H3K4me3	2.1094	2.42303	35485900
23	H3K4me2	5.27767	3.87375	35485900
23	H3K4me1	5.01496	2.59621	35485900
23	RNApol2A_pS5	1.62718	2.64678	35485900
23	H3K9me2	0.81556	0.484156	35485900
23	H3K9me3	0.542045	0.402584	35485900
23	CTFC	1.34547	5.64595	35485900
23	RTX_UGI	1.03876	0.190651	35979515
23	NT_UGI	0.974876	0.141578	35979515
23	ZBTB33	0.929815	0.981076	35485900
23	EZH2_pT487	0.767861	0.452223	35485900
23	H3K27me3	0.525037	0.452751	35485900
23	H3K79me2	2.01027	3.26711	35445425
23	H3K9ac	2.19189	1.96126	35485900
23	RTX_UGI_H3K36me3	1.00776	0.442595	35221124
23	NT_UGI_H3K36me3	0.91461	0.429685	35221124
23	5FdUR_UGI	0.957391	0.170461	35979515
23	H3K36me3	0.859032	0.721864	35485900
23	H4K20me1	0.93895	0.70441	35485900
23	RNApol2A	0.817816	2.02557	35485900
23	WT	0.966251	0.12335	35979515
23	TCF7L2	2.10374	8.05035	35485900
1	ZFX	0.662422	0.331479	156242600
1	YY1	0.36526	0.83965	156242600
1	H3K27ac	0.416782	0.3718	156242600
1	JUND	0.282736	0.396321	156242600
1	EZH2	0.693639	0.430641	156242600
1	H2AFZ	0.511061	0.429527	156242600
1	RTX_UGI_MMR	0.823452	0.0639271	156242600
1	5FdUR_UGI_MMR	0.90081	0.0650693	156242600
1	NT_UGI_MMR	1.20269	0.0926025	156242600
1	H3K4me3	0.711165	0.436986	156242600
1	H3K4me2	0.357088	0.271921	156242600
1	H3K4me1	0.490445	0.287951	156242600
1	RNApol2A_pS5	0.165698	0.344363	156242600
1	H3K9me2	0.665304	0.422385	156242600
1	H3K9me3	1.9852	0.900064	156242600
1	CTFC	0.602641	0.768827	156242600
1	RTX_UGI	0.831247	0.0573628	156242600
1	NT_UGI	1.24023	0.100745	156242600
1	ZBTB33	0.519641	0.738155	156242600
1	EZH2_pT487	0.85651	0.470432	156242600
1	H3K27me3	0.60226	0.455737	156242600
1	H3K79me2	0.46085	0.392307	156128469
1	H3K9ac	0.500399	0.352469	156242600
1	RTX_UGI_H3K36me3	0.822113	0.294194	149575875
1	NT_UGI_H3K36me3	0.902706	0.388288	149575875
1	5FdUR_UGI	0.856104	0.0642711	156242600
1	H3K36me3	0.831757	0.53722	156242600
1	H4K20me1	0.661647	0.467049	156242600
1	RNApol2A	0.773138	1.40343	156242600
1	WT	1.18413	0.0895877	156242600
1	TCF7L2	0.521347	1.47065	156242600
0	ZFX	0.939364	0.348411	87085500
0	YY1	0.831078	1.30805	87085500
0	H3K27ac	0.472801	0.447139	87085500
0	JUND	0.506222	0.40229	87085500
0	EZH2	0.790302	0.561809	87085500
0	H2AFZ	0.570703	0.545846	87085500
0	RTX_UGI_MMR	1.12136	0.151168	87085500
0	5FdUR_UGI_MMR	1.19007	0.108008	87085500
0	NT_UGI_MMR	0.663054	0.0720868	87085500
0	H3K4me3	0.424647	0.342168	87085500
0	H3K4me2	0.439281	0.409204	87085500
0	H3K4me1	0.667873	0.588422	87085500
0	RNApol2A_pS5	0.598807	0.833207	87085500
0	H3K9me2	0.550416	0.433082	87085500
0	H3K9me3	0.499948	0.440779	87085500
0	CTFC	0.939044	3.39313	87085500
0	RTX_UGI	1.1131	0.166146	87085500
0	NT_UGI	0.655721	0.0732784	87085500
0	ZBTB33	0.810364	0.894927	87085500
0	EZH2_pT487	0.678602	0.471066	87085500
0	H3K27me3	0.943854	0.840029	87085500
0	H3K79me2	0.382674	0.470481	86564907
0	H3K9ac	0.587714	0.414548	87085500
0	RTX_UGI_H3K36me3	1.24998	0.497587	86711256
0	NT_UGI_H3K36me3	1.3825	0.596659	86711256
0	5FdUR_UGI	1.38775	0.168991	87085500
0	H3K36me3	0.549176	0.507227	87085500
0	H4K20me1	0.579601	0.464123	87085500
0	RNApol2A	0.578292	1.25202	87085500
0	WT	0.689114	0.0673414	87085500
0	TCF7L2	0.878194	1.74023	87085500
3	ZFX	0.819478	0.406135	81644200
3	YY1	0.377686	0.8467	81640264
3	H3K27ac	0.313357	0.402902	81642079
3	JUND	0.384762	0.438651	81644200
3	EZH2	0.297922	0.328252	81643838
3	H2AFZ	0.288746	0.400499	81644200
3	RTX_UGI_MMR	1.2514	0.132697	81644200
3	5FdUR_UGI_MMR	0.929668	0.114107	81644200
3	NT_UGI_MMR	0.754644	0.0879222	81644200
3	H3K4me3	0.207807	0.258533	81643201
3	H3K4me2	0.201553	0.265263	81641515
3	H3K4me1	0.314144	0.359987	81644200
3	RNApol2A_pS5	0.418888	0.727581	81639784
3	H3K9me2	0.31473	0.358876	81642280
3	H3K9me3	0.268267	0.33301	81644200
3	CTFC	0.32292	0.710438	81641738
3	RTX_UGI	1.31106	0.152959	81644200
3	NT_UGI	0.764034	0.0901193	81644200
3	ZBTB33	0.377168	0.6456	81635340
3	EZH2_pT487	0.303659	0.324782	81643828
3	H3K27me3	0.25629	0.344935	81644200
3	H3K79me2	0.373363	0.647237	81375022
3	H3K9ac	0.292446	0.32236	81643171
3	RTX_UGI_H3K36me3	1.8048	0.82622	78104141
3	NT_UGI_H3K36me3	1.83259	0.8626	78104141
3	5FdUR_UGI	1.11983	0.166635	81644200
3	H3K36me3	0.449101	0.591176	81642900
3	H4K20me1	0.341755	0.40412	81643381
3	RNApol2A	0.268834	0.881218	81636250
3	WT	0.780305	0.0830923	81644200
3	TCF7L2	0.30634	0.73245	81640028
2	ZFX	0.552146	0.297951	250261900
2	YY1	0.505981	0.913827	250261900
2	H3K27ac	0.544861	0.419368	250261900
2	JUND	0.648639	0.616553	250261900
2	EZH2	0.908245	0.526783	250261900
2	H2AFZ	1.14306	0.745581	250261900
2	RTX_UGI_MMR	0.910055	0.10391	250261900
2	5FdUR_UGI_MMR	0.980206	0.0827726	250261900
2	NT_UGI_MMR	1.17055	0.0823117	250261900
2	H3K4me3	0.506081	0.341378	250261900
2	H3K4me2	0.419386	0.328592	250261900
2	H3K4me1	0.557008	0.376054	250261900
2	RNApol2A_pS5	0.293122	0.431106	250261900
2	H3K9me2	1.08584	0.542488	250261900
2	H3K9me3	0.69674	0.451391	250261900
2	CTFC	0.588462	1.35583	250261900
2	RTX_UGI	0.883985	0.0791109	250261900
2	NT_UGI	1.20455	0.0877431	250261900
2	ZBTB33	0.67482	0.760973	250261900
2	EZH2_pT487	0.946343	0.492473	250261900
2	H3K27me3	0.864858	0.702414	250261900
2	H3K79me2	0.494493	0.42281	250078674
2	H3K9ac	0.568723	0.36133	250261900
2	RTX_UGI_H3K36me3	0.815772	0.294553	240485734
2	NT_UGI_H3K36me3	0.822431	0.33823	240485734
2	5FdUR_UGI	0.886848	0.0988447	250261900
2	H3K36me3	0.692238	0.478207	250261900
2	H4K20me1	0.935644	0.54282	250261900
2	RNApol2A	0.669472	1.16875	250261900
2	WT	1.15399	0.0796215	250261900
2	TCF7L2	0.457482	1.05319	250261900
5	ZFX	0.797389	0.425463	103132200
5	YY1	0.722174	1.13242	103132200
5	H3K27ac	0.688416	0.528533	103132200
5	JUND	0.753321	0.612064	103132200
5	EZH2	0.709914	0.427442	103132200
5	H2AFZ	0.541351	0.45745	103132200
5	RTX_UGI_MMR	0.960971	0.131078	103132200
5	5FdUR_UGI_MMR	0.952079	0.099415	103132200
5	NT_UGI_MMR	0.890608	0.0852743	103132200
5	H3K4me3	0.505184	0.352895	103132200
5	H3K4me2	0.508165	0.421063	103132200
5	H3K4me1	0.796576	0.652897	103132200
5	RNApol2A_pS5	0.847397	0.986191	103132200
5	H3K9me2	0.819798	0.498128	103132200
5	H3K9me3	0.634726	0.485701	103132200
5	CTFC	0.77217	2.44493	103132200
5	RTX_UGI	0.940559	0.115829	103132200
5	NT_UGI	0.897338	0.0898227	103132200
5	ZBTB33	0.754589	0.805686	103132200
5	EZH2_pT487	0.726709	0.423866	103132200
5	H3K27me3	0.553128	0.432113	103132200
5	H3K79me2	1.18153	1.19148	103074302
5	H3K9ac	0.669367	0.416742	103132200
5	RTX_UGI_H3K36me3	1.34647	0.600493	102743280
5	NT_UGI_H3K36me3	1.24727	0.590842	102743280
5	5FdUR_UGI	0.820716	0.105376	103132200
5	H3K36me3	1.17346	0.872648	103132200
5	H4K20me1	1.01284	0.626292	103132200
5	RNApol2A	0.66477	1.23945	103132200
5	WT	0.895474	0.0809444	103132200
5	TCF7L2	0.618365	1.25962	103132200
4	ZFX	0.958195	0.415551	119968942
4	YY1	0.768211	1.28594	119968800
4	H3K27ac	0.447743	0.412755	119968916
4	JUND	0.607683	0.529409	119969212
4	EZH2	1.24699	0.81261	119968800
4	H2AFZ	0.624022	0.53411	119968800
4	RTX_UGI_MMR	0.830272	0.10961	119971100
4	5FdUR_UGI_MMR	1.13207	0.106414	119971100
4	NT_UGI_MMR	0.761118	0.0772616	119971100
4	H3K4me3	0.503054	0.362051	119968784
4	H3K4me2	0.447223	0.404832	119968800
4	H3K4me1	0.6044	0.500658	119968858
4	RNApol2A_pS5	0.447191	0.655526	119968800
4	H3K9me2	0.728321	0.472144	119968539
4	H3K9me3	0.695223	0.568024	119968800
4	CTFC	0.958962	3.25538	119968800
4	RTX_UGI	0.809165	0.0866665	119971100
4	NT_UGI	0.75541	0.0791162	119971100
4	ZBTB33	0.860064	0.930676	119968800
4	EZH2_pT487	1.0006	0.606919	119968800
4	H3K27me3	1.64545	1.16252	119968630
4	H3K79me2	0.403423	0.422266	119544714
4	H3K9ac	0.558756	0.378593	119968725
4	RTX_UGI_H3K36me3	1.05864	0.406551	119792312
4	NT_UGI_H3K36me3	1.20452	0.509477	119792312
4	5FdUR_UGI	0.977999	0.131801	119971100
4	H3K36me3	0.604762	0.478231	119968800
4	H4K20me1	0.70331	0.494512	119968800
4	RNApol2A	0.669114	1.28051	119968746
4	WT	0.777857	0.0723307	119971100
4	TCF7L2	0.789112	1.6583	119968751
7	ZFX	0.167251	0.282771	242900070
7	YY1	0.0327778	0.248936	242292664
7	H3K27ac	0.0283777	0.113362	242385793
7	JUND	0.0448746	0.17697	242675825
7	EZH2	0.0476059	0.142637	242594574
7	H2AFZ	0.0397983	0.146819	242479664
7	RTX_UGI_MMR	0.959389	0.101831	242912830
7	5FdUR_UGI_MMR	0.997473	0.0610483	242912830
7	NT_UGI_MMR	0.986853	0.0690248	242912830
7	H3K4me3	0.0349285	0.113803	242524783
7	H3K4me2	0.0235571	0.0860816	242430873
7	H3K4me1	0.0315898	0.0954866	242597956
7	RNApol2A_pS5	0.0206695	0.13251	242287284
7	H3K9me2	0.0492126	0.150313	242486404
7	H3K9me3	0.0744554	0.203045	242589782
7	CTFC	0.0408368	0.225826	242336546
7	RTX_UGI	0.958112	0.0926693	242912830
7	NT_UGI	0.994944	0.0682781	242912830
7	ZBTB33	0.0395812	0.212512	242183762
7	EZH2_pT487	0.0493712	0.141878	242640289
7	H3K27me3	0.0472235	0.159589	242467814
7	H3K79me2	0.0592403	0.238042	165112343
7	H3K9ac	0.0316907	0.106155	242406238
7	RTX_UGI_H3K36me3	1.15912	0.49302	78430035
7	NT_UGI_H3K36me3	1.2602	0.579409	78430035
7	5FdUR_UGI	0.975765	0.0820299	242912830
7	H3K36me3	0.0466421	0.152297	242376380
7	H4K20me1	0.0431549	0.144442	242402054
7	RNApol2A	0.0288303	0.284076	242091644
7	WT	0.988615	0.0636273	242912830
7	TCF7L2	0.0253481	0.210724	242140837
6	ZFX	0.759768	0.397289	164593093
6	YY1	0.632525	1.11254	164592900
6	H3K27ac	0.449926	0.377266	164592900
6	JUND	0.632244	0.584914	164593011
6	EZH2	1.56996	0.821393	164592900
6	H2AFZ	0.720107	0.519854	164592900
6	RTX_UGI_MMR	0.839315	0.104558	164594100
6	5FdUR_UGI_MMR	1.02287	0.0877416	164594100
6	NT_UGI_MMR	0.963698	0.088598	164594100
6	H3K4me3	0.528642	0.355068	164592900
6	H3K4me2	0.41263	0.310445	164592900
6	H3K4me1	0.526752	0.321993	164592900
6	RNApol2A_pS5	0.334706	0.485144	164592900
6	H3K9me2	0.894541	0.49661	164592900
6	H3K9me3	0.706502	0.453289	164592900
6	CTFC	0.727815	1.68104	164592900
6	RTX_UGI	0.828269	0.0782286	164594100
6	NT_UGI	0.968671	0.0947886	164594100
6	ZBTB33	0.839407	0.916365	164592900
6	EZH2_pT487	1.30411	0.651032	164592900
6	H3K27me3	2.16576	1.12043	164592900
6	H3K79me2	0.420074	0.362069	164419917
6	H3K9ac	0.556531	0.361766	164592900
6	RTX_UGI_H3K36me3	0.887951	0.326798	163945621
6	NT_UGI_H3K36me3	0.982525	0.419429	163945621
6	5FdUR_UGI	0.859038	0.0878481	164594100
6	H3K36me3	0.615907	0.43382	164592900
6	H4K20me1	0.92099	0.547866	164592900
6	RNApol2A	0.73643	1.2993	164592900
6	WT	0.957649	0.0846032	164594100
6	TCF7L2	0.610978	1.1818	164592900
9	ZFX	0.85851	0.448792	125357998
9	YY1	0.312724	0.789849	125355025
9	H3K27ac	0.210894	0.301529	125357647
9	JUND	0.328221	0.440863	125357998
9	EZH2	0.392249	0.388416	125357675
9	H2AFZ	0.246223	0.335317	125355786
9	RTX_UGI_MMR	0.798643	0.0900296	125357998
9	5FdUR_UGI_MMR	1.00793	0.0906283	125357998
9	NT_UGI_MMR	0.841682	0.0920067	125357998
9	H3K4me3	0.287442	0.315171	125357598
9	H3K4me2	0.189134	0.234607	125356894
9	H3K4me1	0.253864	0.264333	125357659
9	RNApol2A_pS5	0.197369	0.426747	125355468
9	H3K9me2	0.351351	0.368025	125357598
9	H3K9me3	0.65276	0.711418	125357990
9	CTFC	0.386308	0.819186	125355747
9	RTX_UGI	0.790713	0.0785124	125357998
9	NT_UGI	0.84415	0.0941354	125357998
9	ZBTB33	0.367953	0.643873	125355468
9	EZH2_pT487	0.380352	0.361997	125357988
9	H3K27me3	0.416979	0.482454	125357574
9	H3K79me2	0.239245	0.356944	122253590
9	H3K9ac	0.252239	0.281398	125356898
9	RTX_UGI_H3K36me3	1.21022	0.536252	122193527
9	NT_UGI_H3K36me3	1.39769	0.66398	122193527
9	5FdUR_UGI	0.896112	0.0982047	125357998
9	H3K36me3	0.366476	0.418925	125357993
9	H4K20me1	0.307199	0.360336	125357688
9	RNApol2A	0.311068	0.908677	125353386
9	WT	0.850663	0.0845814	125357998
9	TCF7L2	0.32885	0.765937	125355530
8	ZFX	0.734017	0.400177	74624700
8	YY1	0.699884	1.03741	74624700
8	H3K27ac	1.17406	0.92358	74624700
8	JUND	0.828985	0.638067	74624700
8	EZH2	0.669148	0.410028	74624700
8	H2AFZ	0.522694	0.417521	74624700
8	RTX_UGI_MMR	1.24991	0.145255	74624700
8	5FdUR_UGI_MMR	0.943213	0.104425	74624700
8	NT_UGI_MMR	0.91534	0.0983703	74624700
8	H3K4me3	0.543978	0.368173	74624700
8	H3K4me2	0.641201	0.541196	74624700
8	H3K4me1	1.04007	0.83437	74624700
8	RNApol2A_pS5	1.347	1.60048	74624700
8	H3K9me2	0.744633	0.463932	74624700
8	H3K9me3	0.604693	0.467629	74624700
8	CTFC	0.694912	1.81023	74624700
8	RTX_UGI	1.26354	0.173695	74624700
8	NT_UGI	0.928125	0.102551	74624700
8	ZBTB33	0.753042	0.770062	74624700
8	EZH2_pT487	0.724232	0.422445	74624700
8	H3K27me3	0.476266	0.371555	74624700
8	H3K79me2	4.36279	3.83502	74610483
8	H3K9ac	0.817335	0.491694	74624700
8	RTX_UGI_H3K36me3	1.64815	0.756882	74297643
8	NT_UGI_H3K36me3	1.40421	0.700999	74297643
8	5FdUR_UGI	1.00861	0.136381	74624700
8	H3K36me3	2.0493	1.33879	74624700
8	H4K20me1	1.59346	0.905471	74624700
8	RNApol2A	0.677816	1.1504	74624700
8	WT	0.923399	0.0922532	74624700
8	TCF7L2	0.571672	1.03082	74624700
11	ZFX	0.578102	0.420574	167283604
11	YY1	0.259386	0.680883	167282772
11	H3K27ac	0.231722	0.297768	167283604
11	JUND	0.273808	0.414761	167283604
11	EZH2	0.378779	0.359276	167283604
11	H2AFZ	0.362123	0.423241	167283604
11	RTX_UGI_MMR	0.863168	0.0929829	167283604
11	5FdUR_UGI_MMR	0.946474	0.0791283	167283604
11	NT_UGI_MMR	1.13507	0.0976624	167283604
11	H3K4me3	0.27709	0.28582	167283604
11	H3K4me2	0.180613	0.208641	167283604
11	H3K4me1	0.252394	0.233045	167283604
11	RNApol2A_pS5	0.146596	0.33195	167282782
11	H3K9me2	0.443711	0.408463	167283604
11	H3K9me3	0.616247	0.556897	167283604
11	CTFC	0.332155	0.597569	167283604
11	RTX_UGI	0.867384	0.0782	167283604
11	NT_UGI	1.16278	0.105733	167283604
11	ZBTB33	0.330434	0.586785	167282782
11	EZH2_pT487	0.420943	0.366613	167283604
11	H3K27me3	0.348281	0.405393	167283604
11	H3K79me2	0.270786	0.363717	165322026
11	H3K9ac	0.251628	0.268365	167283604
11	RTX_UGI_H3K36me3	1.07016	0.451813	152181404
11	NT_UGI_H3K36me3	1.17147	0.562597	152181404
11	5FdUR_UGI	0.884179	0.0874112	167283604
11	H3K36me3	0.365501	0.391148	167283604
11	H4K20me1	0.384204	0.396639	167283604
11	RNApol2A	0.340587	0.93434	167282604
11	WT	1.12507	0.0948731	167283604
11	TCF7L2	0.255173	0.665291	167283604
10	ZFX	0.585065	0.336465	89980600
10	YY1	0.541548	0.869488	89980600
10	H3K27ac	0.84231	0.604067	89980600
10	JUND	0.866481	0.700312	89980600
10	EZH2	0.732316	0.41267	89980600
10	H2AFZ	0.664594	0.473033	89980600
10	RTX_UGI_MMR	1.10809	0.144746	89980600
10	5FdUR_UGI_MMR	0.931436	0.0916484	89980600
10	NT_UGI_MMR	1.12656	0.100053	89980600
10	H3K4me3	0.510643	0.334223	89980600
10	H3K4me2	0.491352	0.381994	89980600
10	H3K4me1	0.753336	0.562237	89980600
10	RNApol2A_pS5	0.696511	0.792162	89980600
10	H3K9me2	0.925088	0.494624	89980600
10	H3K9me3	0.647818	0.461476	89980600
10	CTFC	0.59506	1.38334	89980600
10	RTX_UGI	1.07877	0.14171	89980600
10	NT_UGI	1.15664	0.107999	89980600
10	ZBTB33	0.65399	0.683296	89980600
10	EZH2_pT487	0.819209	0.427887	89980600
10	H3K27me3	0.518298	0.381415	89980600
10	H3K79me2	1.96653	1.89043	89964365
10	H3K9ac	0.692518	0.409768	89980600
10	RTX_UGI_H3K36me3	1.15483	0.518573	87810931
10	NT_UGI_H3K36me3	0.997429	0.477064	87810931
10	5FdUR_UGI	0.846294	0.112516	89980600
10	H3K36me3	1.45719	0.962029	89980600
10	H4K20me1	1.3357	0.71882	89980600
10	RNApol2A	0.647569	1.06813	89980600
10	WT	1.11793	0.0953707	89980600
10	TCF7L2	0.452755	0.84094	89980600
13	ZFX	0.830679	0.441977	87922998
13	YY1	0.455105	0.934659	87918202
13	H3K27ac	0.294761	0.352072	87921981
13	JUND	0.465284	0.500206	87923786
13	EZH2	0.449527	0.392776	87919872
13	H2AFZ	0.4648	0.503571	87920110
13	RTX_UGI_MMR	1.05854	0.118718	87929300
13	5FdUR_UGI_MMR	1.12845	0.0937876	87929300
13	NT_UGI_MMR	0.848168	0.0806719	87929300
13	H3K4me3	0.278937	0.293546	87922884
13	H3K4me2	0.250626	0.292877	87919347
13	H3K4me1	0.354779	0.372909	87922986
13	RNApol2A_pS5	0.307241	0.547639	87918289
13	H3K9me2	0.488849	0.432383	87919950
13	H3K9me3	0.389028	0.393468	87920726
13	CTFC	0.433606	0.930887	87919816
13	RTX_UGI	1.00331	0.115251	87929300
13	NT_UGI	0.85027	0.0822131	87929300
13	ZBTB33	0.489095	0.719515	87918289
13	EZH2_pT487	0.431995	0.370647	87921306
13	H3K27me3	0.452087	0.476689	87919475
13	H3K79me2	0.272271	0.385833	87425372
13	H3K9ac	0.331394	0.321625	87919755
13	RTX_UGI_H3K36me3	1.22146	0.492259	85811864
13	NT_UGI_H3K36me3	1.31712	0.583386	85811864
13	5FdUR_UGI	1.15893	0.14107	87929300
13	H3K36me3	0.388836	0.431083	87919991
13	H4K20me1	0.389524	0.395144	87919086
13	RNApol2A	0.369174	0.976894	87915986
13	WT	0.857491	0.0754881	87929300
13	TCF7L2	0.397963	1.04097	87917861
12	ZFX	0.604709	0.351054	110532500
12	YY1	0.567262	0.944006	110532500
12	H3K27ac	0.603461	0.453566	110532500
12	JUND	0.762363	0.644264	110532500
12	EZH2	0.833082	0.48577	110532500
12	H2AFZ	1.25214	0.833645	110532500
12	RTX_UGI_MMR	1.26318	0.131086	110532500
12	5FdUR_UGI_MMR	1.02303	0.0988388	110532500
12	NT_UGI_MMR	1.06498	0.0982045	110532500
12	H3K4me3	0.508055	0.342815	110532500
12	H3K4me2	0.469722	0.386282	110532500
12	H3K4me1	0.665667	0.514843	110532500
12	RNApol2A_pS5	0.389084	0.528004	110532500
12	H3K9me2	1.03145	0.539113	110532500
12	H3K9me3	0.698257	0.49779	110532500
12	CTFC	0.651171	1.8111	110532500
12	RTX_UGI	1.23198	0.162446	110532500
12	NT_UGI	1.08509	0.104861	110532500
12	ZBTB33	0.681574	0.729866	110532500
12	EZH2_pT487	0.871655	0.470447	110532500
12	H3K27me3	0.757127	0.609676	110532500
12	H3K79me2	0.520829	0.475268	110425438
12	H3K9ac	0.61162	0.383035	110532500
12	RTX_UGI_H3K36me3	0.896591	0.340361	108397472
12	NT_UGI_H3K36me3	0.876183	0.372526	108397472
12	5FdUR_UGI	1.10587	0.13462	110532500
12	H3K36me3	0.768211	0.560105	110532500
12	H4K20me1	0.841872	0.52288	110532500
12	RNApol2A	0.640888	1.09247	110532500
12	WT	1.05842	0.0936687	110532500
12	TCF7L2	0.487048	1.06904	110532500
15	ZFX	0.864803	0.420964	102553500
15	YY1	0.776588	1.20528	102553500
15	H3K27ac	0.585789	0.473746	102553500
15	JUND	0.645949	0.514127	102553500
15	EZH2	0.82923	0.533155	102553500
15	H2AFZ	0.962709	0.744327	102553500
15	RTX_UGI_MMR	1.36047	0.115323	102553500
15	5FdUR_UGI_MMR	1.008	0.10838	102553500
15	NT_UGI_MMR	0.810975	0.0780263	102553500
15	H3K4me3	0.49311	0.353855	102553500
15	H3K4me2	0.497793	0.423471	102553500
15	H3K4me1	0.750671	0.61748	102553500
15	RNApol2A_pS5	0.542489	0.711502	102553500
15	H3K9me2	0.824212	0.511273	102553500
15	H3K9me3	0.643406	0.513568	102553500
15	CTFC	0.832553	2.70321	102553500
15	RTX_UGI	1.39892	0.137468	102553500
15	NT_UGI	0.815663	0.0808967	102553500
15	ZBTB33	0.801934	0.845844	102553500
15	EZH2_pT487	0.790346	0.484763	102553500
15	H3K27me3	0.897092	0.767322	102553500
15	H3K79me2	0.439652	0.424843	102369215
15	H3K9ac	0.644344	0.416814	102553500
15	RTX_UGI_H3K36me3	1.11252	0.420488	102348066
15	NT_UGI_H3K36me3	1.14341	0.48239	102348066
15	5FdUR_UGI	1.24846	0.154379	102553500
15	H3K36me3	0.671287	0.536083	102553500
15	H4K20me1	0.694204	0.491832	102553500
15	RNApol2A	0.650925	1.22178	102553269
15	WT	0.826458	0.0748701	102553500
15	TCF7L2	0.685453	1.39337	102552957
14	ZFX	0.96829	0.645419	39846500
14	YY1	1.69756	2.93124	39846500
14	H3K27ac	2.98322	3.87225	39846500
14	JUND	0.764973	0.755337	39846500
14	EZH2	0.759472	0.597872	39846500
14	H2AFZ	1.55867	1.46149	39846500
14	RTX_UGI_MMR	1.11642	0.15869	39846500
14	5FdUR_UGI_MMR	0.979477	0.15354	39846500
14	NT_UGI_MMR	0.698222	0.0953066	39846500
14	H3K4me3	2.12964	2.4889	39846500
14	H3K4me2	5.40069	4.3029	39846500
14	H3K4me1	5.58529	3.3268	39846500
14	RNApol2A_pS5	2.17004	3.27494	39846500
14	H3K9me2	0.62427	0.447354	39846500
14	H3K9me3	0.491999	0.405791	39846500
14	CTFC	3.18049	12.2481	39846500
14	RTX_UGI	1.21231	0.191459	39846500
14	NT_UGI	0.694065	0.0976644	39846500
14	ZBTB33	1.05937	1.18025	39846500
14	EZH2_pT487	0.705106	0.507648	39846500
14	H3K27me3	0.538774	0.537479	39846500
14	H3K79me2	1.42786	2.56396	39771194
14	H3K9ac	2.257	1.78934	39846500
14	RTX_UGI_H3K36me3	1.29627	0.571246	39695705
14	NT_UGI_H3K36me3	1.22172	0.582319	39695705
14	5FdUR_UGI	1.16783	0.200279	39846500
14	H3K36me3	0.79781	0.79114	39846500
14	H4K20me1	0.791814	0.641273	39846500
14	RNApol2A	1.05311	2.738	39846500
14	WT	0.721304	0.0895506	39846500
14	TCF7L2	2.18738	6.95969	39846500
17	ZFX	0.793333	0.423543	124066400
17	YY1	0.76647	1.22123	124066400
17	H3K27ac	0.55422	0.43593	124066400
17	JUND	0.715239	0.589053	124066400
17	EZH2	0.969726	0.572488	124066400
17	H2AFZ	1.02617	0.723991	124066400
17	RTX_UGI_MMR	1.13562	0.11661	124068200
17	5FdUR_UGI_MMR	1.14079	0.0955247	124068200
17	NT_UGI_MMR	0.88157	0.0756825	124068200
17	H3K4me3	0.531875	0.354549	124066400
17	H3K4me2	0.500242	0.415766	124066400
17	H3K4me1	0.698952	0.547708	124066400
17	RNApol2A_pS5	0.473157	0.625132	124066400
17	H3K9me2	0.966106	0.527582	124066400
17	H3K9me3	0.69671	0.489594	124066400
17	CTFC	0.87797	2.88641	124066400
17	RTX_UGI	1.06142	0.113657	124068200
17	NT_UGI	0.882593	0.0782234	124068200
17	ZBTB33	0.833703	0.857356	124066400
17	EZH2_pT487	0.911261	0.504748	124066400
17	H3K27me3	1.09074	0.853659	124066400
17	H3K79me2	0.45992	0.431168	123912002
17	H3K9ac	0.633103	0.389893	124066400
17	RTX_UGI_H3K36me3	0.976441	0.366716	123781213
17	NT_UGI_H3K36me3	1.01963	0.431061	123781213
17	5FdUR_UGI	1.17378	0.135681	124068200
17	H3K36me3	0.704419	0.507629	124066400
17	H4K20me1	0.78249	0.502055	124066400
17	RNApol2A	0.689429	1.22421	124066400
17	WT	0.885161	0.0721835	124068200
17	TCF7L2	0.68226	1.43051	124066400
16	ZFX	0.646598	0.373117	212316710
16	YY1	0.587348	1.03107	212315660
16	H3K27ac	0.48898	0.401736	212315685
16	JUND	0.656676	0.607287	212316050
16	EZH2	0.779499	0.44786	212315681
16	H2AFZ	0.927056	0.661142	212315767
16	RTX_UGI_MMR	0.937538	0.101643	212321100
16	5FdUR_UGI_MMR	1.05167	0.0852196	212321100
16	NT_UGI_MMR	1.00965	0.0733737	212321100
16	H3K4me3	0.467153	0.332982	212315688
16	H3K4me2	0.401529	0.327367	212315500
16	H3K4me1	0.540001	0.397938	212315500
16	RNApol2A_pS5	0.344965	0.488911	212315699
16	H3K9me2	0.957061	0.524965	212315818
16	H3K9me3	0.640006	0.441681	212315910
16	CTFC	0.660632	1.83638	212315605
16	RTX_UGI	0.884986	0.0830076	212321100
16	NT_UGI	1.02174	0.0765167	212321100
16	ZBTB33	0.718163	0.805759	212315697
16	EZH2_pT487	0.788925	0.436561	212315849
16	H3K27me3	0.734292	0.530638	212315596
16	H3K79me2	0.431284	0.399514	211997262
16	H3K9ac	0.533433	0.356523	212315500
16	RTX_UGI_H3K36me3	0.897686	0.33815	209667134
16	NT_UGI_H3K36me3	0.930847	0.401776	209667134
16	5FdUR_UGI	0.945227	0.103958	212321100
16	H3K36me3	0.633882	0.466147	212315685
16	H4K20me1	0.75329	0.491792	212315630
16	RNApol2A	0.641001	1.15649	212315339
16	WT	1.00286	0.0707649	212321100
16	TCF7L2	0.516068	1.05586	212315529
19	ZFX	0.946968	0.346187	54872900
19	YY1	0.992478	1.45181	54872900
19	H3K27ac	1.2632	1.19036	54872900
19	JUND	0.632947	0.45397	54872900
19	EZH2	0.559668	0.392429	54872900
19	H2AFZ	0.324671	0.34017	54872900
19	RTX_UGI_MMR	1.19842	0.148868	54872900
19	5FdUR_UGI_MMR	0.953113	0.124671	54872900
19	NT_UGI_MMR	0.670725	0.0845798	54872900
19	H3K4me3	0.509605	0.41061	54872900
19	H3K4me2	0.576236	0.593111	54872900
19	H3K4me1	0.945578	0.827142	54872900
19	RNApol2A_pS5	2.71143	3.00673	54872900
19	H3K9me2	0.464222	0.376534	54872900
19	H3K9me3	0.515201	0.457791	54872900
19	CTFC	1.09169	4.38311	54872900
19	RTX_UGI	1.2478	0.182429	54872900
19	NT_UGI	0.665337	0.0885188	54872900
19	ZBTB33	0.880123	0.924494	54872900
19	EZH2_pT487	0.549006	0.380045	54872900
19	H3K27me3	0.398837	0.359039	54872900
19	H3K79me2	2.41467	2.76918	54847972
19	H3K9ac	0.810827	0.545801	54872900
19	RTX_UGI_H3K36me3	2.35671	0.92747	54742634
19	NT_UGI_H3K36me3	2.17306	0.951614	54742634
19	5FdUR_UGI	1.09205	0.166177	54872900
19	H3K36me3	2.39775	1.44732	54872900
19	H4K20me1	1.13701	0.74991	54872900
19	RNApol2A	0.745701	1.38907	54872900
19	WT	0.69464	0.0806912	54872900
19	TCF7L2	0.941127	1.66748	54872900
18	ZFX	0.489145	0.297928	140729900
18	YY1	0.388233	0.768075	140729900
18	H3K27ac	0.485611	0.407535	140729900
18	JUND	0.474796	0.554661	140729900
18	EZH2	0.700156	0.460934	140729900
18	H2AFZ	1.09436	0.803653	140729900
18	RTX_UGI_MMR	0.92223	0.109315	140729900
18	5FdUR_UGI_MMR	0.928703	0.0808472	140729900
18	NT_UGI_MMR	1.37551	0.112862	140729900
18	H3K4me3	0.478175	0.359496	140729900
18	H3K4me2	0.345321	0.295041	140729900
18	H3K4me1	0.475756	0.318932	140729900
18	RNApol2A_pS5	0.205525	0.358029	140729900
18	H3K9me2	0.958964	0.550335	140729900
18	H3K9me3	0.889985	0.695596	140729900
18	CTFC	0.475446	0.87962	140729900
18	RTX_UGI	0.915545	0.0945977	140729900
18	NT_UGI	1.43944	0.122936	140729900
18	ZBTB33	0.517982	0.670252	140729900
18	EZH2_pT487	0.819006	0.47718	140729900
18	H3K27me3	0.57173	0.506433	140729900
18	H3K79me2	0.486867	0.454701	140324558
18	H3K9ac	0.477638	0.349847	140729900
18	RTX_UGI_H3K36me3	0.840977	0.308024	119878954
18	NT_UGI_H3K36me3	0.848575	0.35721	119878954
18	5FdUR_UGI	0.880766	0.0885508	140729900
18	H3K36me3	0.652117	0.497277	140729900
18	H4K20me1	0.814412	0.539165	140729900
18	RNApol2A	0.625618	1.1686	140729900
18	WT	1.3514	0.107319	140729900
18	TCF7L2	0.368303	0.836708	140729900
