# Supplementary material for: Genome-wide alterations of uracil distribution patterns in human DNA upon chemotherapeutic treatments
Source: eLife. 2020 Sep 21;9:e60498. doi: 10.7554/eLife.60498 (PMC7505663; doi:10.7554/eLife.60498)
Supplement: Figure 4—source data 3. [file elife-60498-fig4-data3.xlsx]

## Sheet: Uscore_vs_RT.data
Chrom	Start	End	Replication timing score	Replication timing group	WT	NT_UGI	NT_UGI_MMR	5FdUR_UGI	5FdUR_UGI_MMR	RTX_UGI	RTX_UGI_MMR
chr1	5001	10000	0.728425	6	0	0	0	0	0	0	0
chr1	10001	15000	0.82567	6	-0.109561	-0.12436	NA	0.0898009	NA	-0.019035	NA
chr1	15001	20000	0.918044	7	-0.1212	-0.119919	-0.127843	0.0214304	0.0932362	-0.0318721	-0.0128256
chr1	20001	25000	1.00555	7	0	0	0	0	0	0	0
chr1	25001	30000	1.08818	7	0	0	0	0	0	0	0
chr1	30001	35000	1.16582	7	0	0	0	0	0	0	0
chr1	35001	40000	1.23837	7	0	0	0	0	0	0	0
chr1	40001	45000	1.30582	7	0	0	0	0	0	0	0
chr1	45001	50000	1.36816	7	-0.14019	-0.138687	-0.0962168	0.185933	0.00708786	0.13897	0.082251
chr1	50001	55000	1.42553	7	-0.259219	-0.218398	-0.198164	0.334513	0.0234559	0.247888	0.288307
chr1	55001	60000	1.47795	7	0.0396994	0.0260784	0.235052	0.248105	0.0697225	0.240199	0.439001
chr1	60001	65000	1.52528	7	0.224185	0.289764	0.322439	0.221341	-0.0165354	0.373156	0.424279
chr1	65001	70000	1.56739	7	0.092968	0.130987	0.177602	0.0166397	-0.0224359	0.136235	0.117549
chr1	70001	75000	1.60413	7	-0.0280088	-0.022049	-0.0474441	0.118557	0.0528286	0.12681	0.125337
chr1	75001	80000	1.63595	8	0.15632	0.0187248	-0.0385635	0.314294	0.237285	0.311215	0.261868
chr1	80001	85000	1.66306	8	0.254511	0.242391	0.157459	0.0906369	-0.0563939	0.385734	0.320317
chr1	85001	90000	1.68496	8	-0.0465625	-0.0597167	0.0735041	0.427919	0.103218	0.454416	0.350652
chr1	90001	95000	1.70112	8	-0.18871	-0.160748	-0.169668	0.264865	0.202188	0.296985	0.0862234
chr1	95001	100000	1.71227	8	0.0459847	-0.00145095	0.0261361	-0.00188839	-0.0659491	-0.0712085	0.137428
chr1	100001	105000	1.71908	8	0.0161524	0.00229695	-0.0110391	0.0176841	0.0127011	-0.0547509	0.104087
chr1	105001	110000	1.72088	8	0	0	-0.142171	0	0.0978383	0	0.0934338
chr1	110001	115000	1.71702	8	0	0	-0.146205	0	0.150876	0	0.0805389
chr1	115001	120000	1.70686	8	0	0	0	0	0	0	0
chr1	120001	125000	1.68954	8	0	0	0	0	0	0	0
chr1	125001	130000	1.66563	8	0	0	0	0	0	0	0
chr1	130001	135000	1.63667	8	-0.0569922	-0.0786907	-0.264402	0.0101198	0.038245	-0.0445398	-0.00186682
chr1	135001	140000	1.60418	7	-0.342446	-0.447372	-0.441207	0.200422	0.115637	0.0553785	0.0454163
chr1	140001	145000	1.55674	7	-0.237394	-0.289103	-0.278817	0.16063	0.148036	0.114695	0.111319
chr1	145001	150000	1.49085	7	0	0	0	0	0	0	0
chr1	150001	155000	1.41992	7	0	0	0	0	0	0	0
chr1	155001	160000	1.35735	7	0	0	0	0	0	0	0
chr1	160001	165000	1.31651	7	0	0	0	0	0	0	0
chr1	165001	170000	1.28956	7	0	0	0	0	0	0	0
chr1	170001	175000	1.26178	7	0	0	0	0	0	0	0
chr1	175001	180000	1.23629	7	-0.222828	-0.2814	-0.199099	0.12079	0.0311487	-0.069829	-0.102058
chr1	180001	185000	1.21621	7	-0.434762	-0.464771	-0.768416	0.214136	0.208922	-0.138129	-0.0899108
chr1	185001	190000	1.2011	7	-0.602638	-0.518462	-0.60371	0.188153	0.233676	-0.0988805	0.0741116
chr1	190001	195000	1.1883	7	-0.297646	-0.231374	-0.144444	0.0480679	0.0939674	-0.0486595	-0.0624043
chr1	195001	200000	1.17763	7	0	0	0	0	0	0	0
chr1	200001	205000	1.16893	7	0	0	0	0	0	0	0
chr1	250001	255000	1.15151	7	0	0	0	0	0	0	0
chr1	255001	260000	1.16695	7	0	0	0	0	0	0	0
chr1	260001	265000	1.19929	7	0	0	0	0	0	0	0
chr1	265001	270000	1.23174	7	0	0	-0.0602529	0	-0.0329332	0	-0.0194449
chr1	270001	275000	1.24748	7	0	0	-0.0169446	0	-0.0484234	0	-0.0248343
chr1	275001	280000	1.24675	7	0	0	0	0	0	0	0
chr1	280001	285000	1.24143	7	0	0	0	0	0	0	0
chr1	285001	290000	1.23222	7	0	0	0	0	0	0	0
chr1	290001	295000	1.21983	7	0	0	0	0	0	0	0
chr1	340001	345000	1.07475	7	0	0	0	0	0	0	0
chr1	345001	350000	1.0752	7	0	0	0	0	0	0	0
chr1	350001	355000	1.08108	7	0	0	0	0	0	0	0
chr1	355001	360000	1.08843	7	0	0	0	0	0	0	0
chr1	360001	365000	1.09331	7	0	0	0	0	0	0	0
chr1	365001	370000	1.09667	7	0	0	0	0	0	0	0
chr1	370001	375000	1.10174	7	0	0	0	0	0	0	0
chr1	375001	380000	1.10797	7	0	0	0	0	0	0	0
chr1	380001	385000	1.11481	7	0	0	0	0	0	0	0
chr1	385001	390000	1.12169	7	0	0	0	0	0	0	0
chr1	390001	395000	1.12869	7	0	0	0	0	0	0	0
chr1	395001	400000	1.13652	7	0	0	0	0	0	0	0
chr1	400001	405000	1.14555	7	0	0	0	0	0	0	0
chr1	405001	410000	1.15617	7	0	0	0	0	0	0	0
chr1	410001	415000	1.17383	7	0	0	0	0	0	0	0
chr1	415001	420000	1.2002	7	0	0	0	0	0	0	0
chr1	420001	425000	1.22994	7	0	0	0	0	0	0	0
chr1	425001	430000	1.25775	7	0	0	0	0	0	0	0
chr1	430001	435000	1.27829	7	0	0	0	0	0	0	0
chr1	435001	440000	1.29959	7	0	0	0	0	0	0	0
chr1	440001	445000	1.32816	7	0	0	0	0	0	0	0
chr1	445001	450000	1.35647	7	0	0	0	0	0	0	0
chr1	450001	455000	1.37695	7	0	0	0	0	0	0	0
chr1	455001	460000	1.39506	7	0	0	0	0	0	0	0
chr1	460001	465000	1.41831	7	0	0	0	0	0	0	0
chr1	465001	470000	1.44228	7	0	0	0	0	0	0	0
chr1	470001	475000	1.46253	7	0	0	0	0	0	0	0
chr1	475001	480000	1.47464	7	0	0	0	0	0	0	0
chr1	480001	485000	1.47565	7	0	0	0	0	0	0	0
chr1	485001	490000	1.46976	7	0	0	0	0	0	0	0
chr1	490001	495000	1.46326	7	0	0	0	0	0	0	0
chr1	495001	500000	1.46244	7	0	0	0	0	0	0	0
chr1	500001	505000	1.46813	7	0	0	0	0	0	0	0
chr1	505001	510000	1.47556	7	0	0	0	0	0	0	0
chr1	510001	515000	1.48264	7	0	0	0	0	0	0	0
chr1	515001	520000	1.4873	7	0	0	0	0	0	0	0
chr1	520001	525000	1.48744	7	0	0	0	0	0	0	0
chr1	525001	530000	1.48151	7	0	0	0	0	0	0	0
chr1	530001	535000	1.46993	7	0	0	0	0	0	0	0
chr1	580001	585000	1.23221	7	-0.0144222	-0.0685766	0	0.00502016	0	-0.0213165	0
chr1	585001	590000	1.21517	7	-0.0183344	-0.047846	-0.0389941	0.00398425	0.0713045	-0.0120494	-0.00419777
chr1	590001	595000	1.19569	7	0	0	-0.0234535	0	0.0335234	0	0.0274066
chr1	595001	600000	1.17033	7	-0.0550677	-0.0933073	0.081312	0.141947	0.0861149	0.0555616	0.00967042
chr1	600001	605000	1.14408	7	0.010932	-0.000129973	0.00290701	0.0498217	0.0764288	0.0237955	0.0743233
chr1	605001	610000	1.12195	7	0	0	-0.101051	0	0.00397367	0	-0.0411309
chr1	610001	615000	1.10894	7	0	0	-0.135125	0	0.0349207	0	-0.1013
chr1	615001	620000	1.0944	7	0	0	-0.0796496	0	-0.0607532	0	0.0225654
chr1	620001	625000	1.07103	7	0	0	-0.0745217	0	-0.0630608	0	-0.00441569
chr1	625001	630000	1.04896	7	0	0	0	0	0	0	0
chr1	630001	635000	1.03829	7	0	0	0.0324217	0	0.00349245	0	0.0114793
chr1	635001	640000	1.03812	7	0	0	0.00710286	0	0.00116872	0	0.0102908
chr1	640001	645000	1.04102	7	0	0	0	0	0	0	0
chr1	645001	650000	1.04727	7	0	0	-0.0580873	0	0.016608	0	0.00474099
chr1	650001	655000	1.05716	7	0	0	-0.19722	0	-0.0469056	0	0.038996
chr1	655001	660000	1.07098	7	0	0	0.00157325	0	-0.0183508	0	0.0654566
chr1	660001	665000	1.09987	7	0	0	0.187084	0	0.0134475	0	0.12901
chr1	665001	670000	1.14626	7	0	0	0.125184	0	-0.0201891	0	0.0338536
chr1	670001	675000	1.19735	7	0	0	0.0319879	0	0.00978194	0	0.0260914
chr1	675001	680000	1.24035	7	0	0	0	0	0	0	0
chr1	680001	685000	1.29182	7	0	0	0	0	0	0	0
chr1	685001	690000	1.36659	7	0	0	0.224176	0	-0.0132742	0	0.00909755
chr1	690001	695000	1.44931	7	0	0	0.16117	0	0.00355052	0	0.0241118
chr1	695001	700000	1.52463	7	-0.00566075	0.0100083	0.0595782	-0.00655409	-0.0553156	0.0460854	0.0345359
chr1	700001	705000	1.5772	7	0.0129975	0.0264806	0.0830693	-0.0178993	-0.0573744	0.0720136	0.0383404
chr1	705001	710000	1.61576	8	0	0	0	0	0	0	0
chr1	710001	715000	1.6559	8	0	0	0	0	0	0	0
chr1	715001	720000	1.69253	8	0	0	0	0	0	0	0
chr1	720001	725000	1.72052	8	0	0	0	0	0	0	0
chr1	725001	730000	1.73554	8	0	0	0.012636	0	-0.0519869	0	-0.0343823
chr1	730001	735000	1.74048	8	0.00948067	-0.0170004	0.00612563	-0.00818863	-0.0356254	-0.0204098	-0.0226385
chr1	735001	740000	1.74108	8	0.00623783	-0.0201015	-0.0448896	-0.0239504	0.052294	-0.000605347	0.115443
chr1	740001	745000	1.74311	8	0	0	-0.00881079	0	0.0247374	0	0.00811123
chr1	745001	750000	1.7523	8	0	0	0	0	0	0	0
chr1	750001	755000	1.75915	8	0	0	0	0	0	0	0
chr1	755001	760000	1.75571	8	0	0	0.035586	0	-0.00882143	0	0.0465119
chr1	760001	765000	1.75006	8	0	0	0.0463558	0	-0.100253	0	0.127036
chr1	765001	770000	1.75027	8	-0.0781813	-0.124674	-0.175995	-0.0171036	0.0384866	-0.00689372	0.137935
chr1	770001	775000	1.75541	8	-0.200039	-0.182724	-0.568727	0.0505872	0.104012	0.086385	0.0907693
chr1	775001	780000	1.75912	8	-0.219045	-0.406244	-0.500702	-0.0572898	0.0386113	0.19451	-0.0601443
chr1	780001	785000	1.7614	8	0.10775	0.0871747	0.259814	-0.163644	-0.146599	0.168904	0.173655
chr1	785001	790000	1.76224	8	-0.111335	-0.0468601	0.0251983	-0.177687	-0.142271	0.0604419	0.230146
chr1	790001	795000	1.76163	8	-0.364797	-0.211917	-0.324339	0.0329211	-0.0788675	-0.091008	0.227076
chr1	795001	800000	1.75984	8	-0.160765	-0.0892165	-0.137974	-0.0774521	-0.100018	0.370276	0.382711
chr1	800001	805000	1.75729	8	-0.171063	-0.05016	-0.156363	0.134696	-0.0678836	0.359627	0.454525
chr1	805001	810000	1.75417	8	-0.0923618	0.0326267	0.019703	0.0446351	0.00560609	0.161583	0.268043
chr1	810001	815000	1.75071	8	-0.0256657	0.0857226	0.0248037	0.0222361	-0.0507743	0.378041	0.456801
chr1	815001	820000	1.74091	8	-0.325849	-0.180794	-0.0355249	0.121229	-0.0618787	0.456939	0.240204
chr1	820001	825000	1.72212	8	-0.382638	-0.311289	-0.182652	0.390862	0.13474	0.570342	0.259634
chr1	825001	830000	1.69953	8	-0.3057	-0.244682	-0.140783	0.0731327	-0.04873	0.386764	0.295455
chr1	830001	835000	1.67835	8	-0.283822	-0.383953	-0.452803	0.308872	0.0637145	0.574593	0.39554
chr1	835001	840000	1.66377	8	-0.340687	-0.401028	-0.389218	0.248633	-0.0753283	0.497932	0.399705
chr1	840001	845000	1.66099	8	-0.316042	-0.381855	-0.401456	0.318206	-0.14355	0.503425	0.443993
chr1	845001	850000	1.67521	8	-0.230131	-0.360801	-0.367753	0.273636	-0.0947363	0.698615	0.508488
chr1	850001	855000	1.71163	8	-0.192652	-0.278411	-0.262726	0.295592	-0.0668274	0.51287	0.484455
chr1	855001	860000	1.76482	8	-0.195865	-0.133561	-0.353422	0.270378	0.0209748	0.614949	0.440565
chr1	860001	865000	1.82509	8	-0.132	-0.32447	-0.272078	0.301809	0.147294	0.739226	0.468971
chr1	865001	870000	1.89123	8	-0.274545	-0.431939	-0.366886	0.380412	-0.0210062	0.597087	0.560976
chr1	870001	875000	1.96204	8	-0.14511	-0.240434	-0.234647	0.324553	-0.0326071	0.705229	0.648777
chr1	875001	880000	2.03631	8	-0.294484	-0.35105	-0.414757	0.33911	0.00963888	0.618493	0.381774
chr1	880001	885000	2.12112	8	0.0147564	0.0115285	0.0425143	0.000311178	-0.268296	0.591161	0.532981
chr1	885001	890000	2.21819	8	-0.258641	-0.215359	-0.392192	0.148721	-0.154416	0.639847	0.514325
chr1	890001	895000	2.31823	8	-0.177672	-0.17845	-0.253013	0.131264	-0.136031	0.647129	0.653258
chr1	900001	905000	2.49018	8	-0.646325	-0.766356	-0.830072	0.286475	-0.211021	0.615315	0.419994
chr1	920001	925000	2.81178	9	-0.861821	-1.00683	-1.06041	0.151043	-0.315514	0.203062	-0.114141
chr1	940001	945000	3.16913	9	-0.840561	-0.974827	-1.01176	0.112855	-0.337163	0.240544	-0.033829
chr1	945001	950000	3.25196	9	-0.784364	-0.7212	-0.938021	0.199243	-0.0446562	0.509025	0.40196
chr1	950001	955000	3.32896	9	-0.697374	-0.686811	-0.832012	0.124695	-0.130035	0.544267	0.251945
chr1	965001	970000	3.50886	9	-0.672546	-0.619833	-0.775219	0.0997525	-0.147731	0.346225	0.0813736
chr1	1000001	1005000	3.73653	9	-0.75783	-1.08218	-1.0677	0.0124753	-0.431006	0.275322	-0.246182
chr1	1005001	1010000	3.75817	9	-0.729629	-0.703901	-0.895028	0.166382	-0.37856	0.277686	0.00318749
chr1	1010001	1015000	3.77771	9	-0.41374	-0.666188	-0.713664	0.114842	-0.463397	0.334624	0.124878
chr1	1095001	1100000	3.98706	10	-0.346791	-0.36008	-0.164014	0.123187	-0.212337	0.816565	0.463762
chr1	1100001	1105000	4.00175	10	-0.394133	-0.390036	-0.455282	0.137939	-0.293723	0.708198	0.417697
chr1	1105001	1110000	4.01414	10	-0.475859	-0.539181	-0.553244	0.213702	-0.202622	0.76082	0.46078
chr1	1115001	1120000	4.03369	10	-0.83139	-0.784987	-0.975885	0.209877	-0.351524	0.328707	0.265645
chr1	1120001	1125000	4.04168	10	-0.510422	-0.351711	-0.57603	0.11293	-0.384277	0.423626	0.181948
chr1	1145001	1150000	4.08062	10	-0.850126	-1.05422	-1.00336	0.0570461	-0.442695	0.481417	0.181808
chr1	1150001	1155000	4.09212	10	-0.651177	-0.851198	-0.9195	-0.00557089	-0.354353	0.454781	0.291306
chr1	1155001	1160000	4.10639	10	-0.711187	-0.808184	-0.918862	-0.107254	-0.458372	0.221725	0.124504
chr1	1165001	1170000	4.13824	10	-0.932212	-1.02892	-1.21048	0.0835686	-0.366783	0.346372	0.0231971
chr1	1180001	1185000	4.17556	10	-0.81969	-0.990778	-1.14653	-0.0174234	-0.453712	0.32041	0.0881583
chr1	1185001	1190000	4.18238	10	-0.297199	-0.343157	-0.509195	-0.0381281	-0.381871	0.598471	0.234711
chr1	1190001	1195000	4.18845	10	-0.191717	-0.201847	-0.406901	-0.00448322	-0.318098	0.584605	0.431585
chr1	1245001	1250000	4.21072	10	-0.765073	-0.957971	-1.06858	0.142659	-0.297067	0.499479	0.210939
chr1	1270001	1275000	4.19891	10	-0.574571	-0.834965	-0.859267	-0.113647	-0.32652	0.289119	0.107987
chr1	1275001	1280000	4.19527	10	-0.539521	-0.682008	-0.638691	-0.00126972	-0.362921	0.333629	0.329845
chr1	1320001	1325000	4.10379	10	-0.648861	-0.851769	-0.858658	0.0941539	-0.237118	0.458367	0.142594
chr1	1330001	1335000	4.07696	10	-0.816546	-0.808668	-0.953527	0.0832448	-0.325649	0.448893	0.220263
chr1	1340001	1345000	4.05165	10	-0.751698	-0.827732	-0.99666	0.0510871	-0.25877	0.373467	-0.00671386
chr1	1355001	1360000	4.02041	10	-0.679522	-0.866762	-1.09272	-0.000932593	-0.384251	0.229736	-0.133882
chr1	1360001	1365000	4.01045	10	-0.671452	-0.590201	-0.789702	-0.102225	-0.462266	0.413102	-0.0156608
chr1	1370001	1375000	3.98509	10	-0.847686	-0.941268	-0.987834	-0.0875957	-0.427343	0.211092	0.130977
chr1	1375001	1380000	3.9718	10	-0.605047	-0.709339	-0.773134	-0.0574199	-0.385513	0.379663	0.22107
chr1	1380001	1385000	3.95953	10	-0.824451	-0.755663	-0.920111	-0.0118225	-0.410397	0.509295	0.240758
chr1	1385001	1390000	3.94933	10	-0.667606	-0.675083	-0.804688	0.0405511	-0.408086	0.527901	0.29129
chr1	1390001	1395000	3.9366	10	-0.483018	-0.495995	-0.563481	0.0409488	-0.470416	0.533926	0.448507
chr1	1395001	1400000	3.91932	10	-0.747136	-0.761307	-0.68591	0.11467	-0.405204	0.359314	0.301679
chr1	1400001	1405000	3.90248	10	-0.665231	-0.625534	-0.638091	0.0814598	-0.388613	0.395976	0.330485
chr1	1405001	1410000	3.89106	10	-0.50876	-0.674626	-0.639162	-0.043397	-0.382612	0.320028	0.260313
chr1	1410001	1415000	3.88277	10	-0.198298	-0.521117	-0.482291	-0.0233141	-0.38463	0.531365	0.434856
chr1	1415001	1420000	3.87245	10	-0.275779	-0.555944	-0.536519	-0.0395491	-0.508342	0.543965	0.372845
chr1	1445001	1450000	3.8054	9	-0.505938	-0.616683	-0.751209	-0.0653144	-0.545797	0.219773	0.3412
chr1	1450001	1455000	3.79964	9	-0.599129	-0.808023	-0.882705	-0.00979426	-0.54806	0.159725	0.130359
chr1	1455001	1460000	3.79722	9	-0.697089	-0.677699	-0.813043	-0.178243	-0.487611	0.260244	0.168769
chr1	1470001	1475000	3.80721	9	-0.366414	-0.686033	-0.880442	-0.0954945	-0.350443	0.373985	0.174856
chr1	1475001	1480000	3.8141	9	-0.547203	-0.67288	-0.879261	0.040978	-0.355181	0.297717	0.207802
chr1	1490001	1495000	3.83709	10	-0.708735	-0.7014	-0.734765	0.0583716	-0.357443	0.415729	0.34167
chr1	1495001	1500000	3.84353	10	-0.591328	-0.677674	-0.646556	0.079731	-0.317516	0.284053	0.342807
chr1	1505001	1510000	3.86333	10	-0.490308	-0.631865	-0.63819	0.0843015	-0.327284	0.226863	0.00390601
chr1	1515001	1520000	3.89594	10	-0.518603	-0.570607	-0.798208	0.111045	-0.3775	0.244644	0.253551
chr1	1525001	1530000	3.93566	10	-0.671142	-0.728392	-1.00201	-0.0699064	-0.282905	0.421972	0.445372
chr1	1540001	1545000	3.99606	10	-0.781202	-0.905608	-0.969317	0.0952228	-0.180327	0.220928	0.269598
chr1	1555001	1560000	4.04036	10	-0.578297	-0.558406	-0.727507	0.119483	-0.368675	0.480461	0.43769
chr1	1570001	1575000	4.0834	10	-0.537342	-0.548668	-0.646566	0.0849798	-0.33339	0.504096	0.291485
chr1	1575001	1580000	4.09899	10	-0.444353	-0.486203	-0.488067	0.000102313	-0.349253	0.490018	0.365415
chr1	1580001	1585000	4.11229	10	-0.494902	-0.474139	-0.446331	-0.121341	-0.413671	0.647773	0.480634
chr1	1585001	1590000	4.12157	10	-0.680858	-0.662355	-0.707324	-0.0828361	-0.423495	0.340876	0.283943
chr1	1600001	1605000	4.14185	10	-0.7284	-1.00472	-1.12906	0.028016	-0.412143	0.371563	0.139353
chr1	1605001	1610000	4.14846	10	-0.648996	-0.676333	-0.758844	0.054149	-0.374453	0.471555	0.204943
chr1	1615001	1620000	4.1609	10	-0.714846	-0.925104	-0.959183	0.135913	-0.230865	0.308779	0.31748
chr1	1640001	1645000	4.18321	10	-0.318612	-0.276648	-0.577163	-0.00779925	-0.215281	0.205097	0.0882808
chr1	1655001	1660000	4.18691	10	-0.321131	-0.167324	-0.329595	0.000443865	-0.303304	0.427003	0.30983
chr1	1660001	1665000	4.18598	10	-0.538665	-0.557078	-0.618255	0.103134	-0.267414	0.302963	0.312253
chr1	1665001	1670000	4.18381	10	-0.453336	-0.544428	-0.588282	0.0486968	-0.213603	0.417266	0.398735
chr1	1675001	1680000	4.1754	10	-0.536785	-0.617127	-0.797619	0.0816738	-0.230558	0.196338	0.240698
chr1	1685001	1690000	4.15655	10	-0.564557	-0.570397	-0.69445	-0.0613498	-0.361922	0.242731	-0.0201641
chr1	1715001	1720000	4.05053	10	-0.381828	-0.44722	-0.407901	-0.2033	-0.217265	0.351039	0.336001
chr1	1720001	1725000	4.03238	10	-0.31192	-0.326853	-0.426288	-0.0409289	-0.370079	0.263794	0.344999
chr1	1725001	1730000	4.0158	10	-0.394488	-0.433118	-0.565135	0.0419693	-0.28118	0.245398	0.397897
chr1	1730001	1735000	4.00144	10	-0.585931	-0.61342	-0.726723	-0.0216371	-0.216697	0.293421	0.24796
chr1	1740001	1745000	3.96882	10	-0.340473	-0.341951	-0.559515	-0.0424033	-0.087272	0.270995	0.0156012
chr1	1750001	1755000	3.92858	10	-0.58195	-0.715335	-0.70293	-0.064904	-0.0323985	0.169732	0.0390015
chr1	1765001	1770000	3.87171	10	-0.596242	-0.563773	-0.576199	-0.151196	-0.269359	0.269376	0.286728
chr1	1775001	1780000	3.84801	10	-0.577292	-0.535857	-0.62586	-0.0598992	-0.245856	0.135233	0.152323
chr1	1800001	1805000	3.7486	9	-0.322418	-0.350003	-0.421063	-0.173547	-0.174871	0.524756	0.434541
chr1	1805001	1810000	3.72498	9	-0.409625	-0.511204	-0.529107	-0.0963258	-0.1143	0.292759	0.207105
chr1	1810001	1815000	3.70452	9	-0.310255	-0.289267	-0.537206	-0.00666415	-0.130975	0.434453	0.410239
chr1	1820001	1825000	3.68064	9	-0.34349	-0.323755	-0.334	0.0295328	-0.31691	0.44779	0.344021
chr1	1825001	1830000	3.68101	9	-0.224495	-0.451103	-0.333134	0.0347274	-0.178026	0.446156	0.444807
chr1	1830001	1835000	3.69175	9	-0.37038	-0.602731	-0.414142	-0.0339569	-0.132787	0.389557	0.61504
chr1	1835001	1840000	3.70979	9	-0.33146	-0.467913	-0.603352	-0.124892	-0.286908	0.46076	0.386678
chr1	1840001	1845000	3.73017	9	-0.209333	-0.391797	-0.385483	-0.00383244	-0.179266	0.409297	0.511885
chr1	1845001	1850000	3.74791	9	-0.354088	-0.246051	-0.412954	0.146856	-0.0565269	0.570374	0.412487
chr1	1850001	1855000	3.77124	9	-0.371567	-0.47441	-0.516874	0.0752047	-0.280247	0.420631	0.36378
chr1	1855001	1860000	3.8078	9	-0.335974	-0.342828	-0.478646	-0.103585	-0.159572	0.58261	0.469601
chr1	1860001	1865000	3.85177	10	-0.371068	-0.415599	-0.593276	0.0514172	-0.173698	0.582455	0.307549
chr1	1870001	1875000	3.93857	10	-0.486888	-0.548967	-0.670633	0.0145176	-0.408208	0.447993	0.49128
chr1	1875001	1880000	3.96974	10	-0.430307	-0.441312	-0.462806	0.0398082	-0.243528	0.447193	0.385276
chr1	1880001	1885000	4.00102	10	-0.561776	-0.384761	-0.581377	-0.0525308	-0.378747	0.422835	0.390834
chr1	1890001	1895000	4.08971	10	-0.661284	-0.733981	-1.0179	0.201729	-0.344494	0.205153	-0.0936668
chr1	1900001	1905000	4.17652	10	-0.514512	-0.574788	-0.787453	0.121266	-0.549308	0.362244	0.0948161
chr1	1905001	1910000	4.20546	10	-0.593322	-0.814709	-0.938671	-0.0112309	-0.506932	0.300893	-0.00464503
chr1	1910001	1915000	4.22931	10	-0.587087	-0.841502	-0.897869	0.130074	-0.339705	0.416639	0.146165
chr1	1915001	1920000	4.25667	10	-0.826812	-1.06178	-1.07666	0.108589	-0.357215	0.210766	0.100398
chr1	1920001	1925000	4.28526	10	-0.850133	-1.02241	-1.13121	0.153718	-0.379738	0.393116	0.225017
chr1	1925001	1930000	4.31285	10	-0.687673	-0.92762	-1.01438	0.0694373	-0.313941	0.516082	0.273058
chr1	1935001	1940000	4.35599	10	-0.480545	-0.515525	-0.746099	0.0740533	-0.257165	0.533096	0.274764
chr1	1940001	1945000	4.36365	10	-0.769402	-0.743736	-0.923715	0.185882	-0.313745	0.476009	0.317689
chr1	1945001	1950000	4.36064	10	-0.587034	-0.60441	-0.779026	0.0378725	-0.442072	0.474389	0.378947
chr1	1950001	1955000	4.35389	10	-0.469367	-0.587871	-0.543484	0.0290492	-0.2731	0.655727	0.624145
chr1	1960001	1965000	4.35695	10	-0.680418	-0.616652	-0.932138	0.11905	-0.322147	0.573441	0.392976
chr1	1970001	1975000	4.36245	10	-0.747648	-0.860292	-0.857656	0.204346	-0.187935	0.636685	0.399146
chr1	1975001	1980000	4.35501	10	-0.711528	-0.762417	-0.872627	0.155098	-0.138278	0.553928	0.255498
chr1	1980001	1985000	4.34671	10	-0.771419	-0.823537	-0.862334	0.207981	-0.130718	0.4079	0.296039
chr1	1990001	1995000	4.34525	10	-0.32301	-0.307378	-0.536539	0.166654	-0.22669	0.54025	0.523235
chr1	1995001	2000000	4.36097	10	-0.269081	-0.447353	-0.573762	0.188149	-0.184791	0.793734	0.368795
chr1	2000001	2005000	4.38699	10	-0.311263	-0.288321	-0.447271	0.22268	-0.115486	0.571532	0.2861
chr1	2005001	2010000	4.41714	10	-0.516955	-0.631497	-0.598979	0.284886	-0.328274	0.556519	0.301686
chr1	2020001	2025000	4.51688	10	-0.892437	-0.897178	-1.06065	0.454727	-0.113903	0.571668	0.327016
chr1	2025001	2030000	4.54803	10	-0.695213	-0.829363	-1.12094	0.371247	-0.111752	0.540014	0.336991
chr1	2035001	2040000	4.63659	10	-0.646216	-0.784901	-0.798926	0.392254	-0.0609849	0.503995	0.459384
chr1	2050001	2055000	4.83498	10	-0.741889	-0.895342	-1.06707	0.285586	-0.208795	0.185564	0.0840498
chr1	2060001	2065000	4.96929	10	-0.46213	-0.568947	-0.706449	0.268911	0.032163	0.53758	0.291818
chr1	2070001	2075000	5.07191	10	-0.657485	-0.899285	-0.951385	0.34345	0.00431363	0.370156	0.312175
chr1	2080001	2085000	5.11429	10	-0.637598	-0.668821	-0.942805	0.259532	0.0328475	0.304087	0.25199
chr1	2085001	2090000	5.11712	10	-0.664519	-0.722028	-0.806956	0.285873	0.0299707	0.245159	0.233634
chr1	2090001	2095000	5.12137	10	-0.635888	-0.680993	-0.982764	0.281438	0.0678318	0.210386	0.389577
chr1	2100001	2105000	5.12514	10	-0.673681	-0.752737	-0.849658	0.295872	0.15965	0.295779	0.281387
chr1	2110001	2115000	5.10763	10	-0.817311	-0.928682	-1.03388	0.21867	-0.00876405	0.335254	0.175102
chr1	2115001	2120000	5.08211	10	-0.544604	-0.478652	-0.607246	-0.106379	-0.138518	0.501198	0.352465
chr1	2120001	2125000	5.04202	10	-0.421179	-0.32827	-0.479648	-0.00325363	-0.0788602	0.152531	0.206408
chr1	2145001	2150000	4.74533	10	-0.626189	-0.604781	-0.826402	0.0735721	-0.0161651	0.385843	0.310548
chr1	2150001	2155000	4.6912	10	-0.577321	-0.675223	-0.914079	0.118708	0.0390326	0.402237	0.373302
chr1	2160001	2165000	4.6161	10	-0.62279	-0.673223	-0.826926	-0.0298144	-0.110837	0.418198	0.412394
chr1	2165001	2170000	4.58723	10	-0.761275	-0.844736	-0.799777	0.0525325	-0.218654	0.394659	0.198764
chr1	2180001	2185000	4.4505	10	-0.583666	-0.886596	-0.938815	0.227669	-0.157672	0.293311	0.240724
chr1	2195001	2200000	4.29141	10	-0.800799	-0.871155	-1.04315	-0.0604809	-0.380205	0.0969442	-0.129992
chr1	2210001	2215000	4.17797	10	-0.871888	-0.934286	-0.966936	-0.0556915	-0.464724	-0.104606	-0.0945628
chr1	2215001	2220000	4.15701	10	-0.57992	-0.737676	-0.759038	0.00843295	-0.33878	0.0339373	0.162608
chr1	2230001	2235000	4.11256	10	-0.699615	-0.73297	-0.977238	0.0143636	-0.391718	0.227189	0.160594
chr1	2235001	2240000	4.10314	10	-0.570335	-0.87728	-0.935657	0.100293	-0.30188	0.35213	0.339775
chr1	2260001	2265000	4.08604	10	-0.376428	-0.386301	-0.52556	0.114095	-0.157805	0.491042	0.339234
chr1	2280001	2285000	4.09463	10	-0.631857	-0.692232	-0.89258	0.32413	-0.0651834	0.304483	0.32175
chr1	2295001	2300000	4.10442	10	-0.708349	-0.809335	-0.873304	0.191387	-0.0680665	0.293518	0.343466
chr1	2305001	2310000	4.10909	10	-0.590504	-0.767421	-0.854225	0.301391	0.00576303	0.369042	0.271525
chr1	2320001	2325000	4.10872	10	-0.894257	-1.10994	-1.04442	0.143044	-0.159878	0.374201	0.164725
chr1	2325001	2330000	4.10305	10	-0.797296	-0.943276	-0.996483	0.0727676	-0.200607	0.330187	0.0454989
chr1	2340001	2345000	4.05739	10	-0.806516	-0.804007	-0.890019	0.199118	-0.262992	0.269348	0.276933
chr1	2355001	2360000	4.00395	10	-0.579081	-0.903379	-0.906133	0.247209	-0.175976	0.154463	0.358574
chr1	2360001	2365000	3.99223	10	-0.133955	-0.44212	-0.43789	0.00048939	-0.25012	0.45575	0.231394
chr1	2365001	2370000	3.98633	10	-0.186186	-0.0548255	-0.0903071	0.106629	-0.17969	0.283191	0.311666
chr1	2370001	2375000	3.97605	10	-0.563894	-0.598845	-0.709928	0.193016	0.00606477	0.244569	0.258555
chr1	2380001	2385000	3.92622	10	-0.722805	-0.87695	-1.04308	0.594291	0.000213612	0.392488	0.257712
chr1	2390001	2395000	3.87696	10	-0.714382	-0.739389	-0.884724	0.307214	-0.0345841	0.240187	0.381117
chr1	2395001	2400000	3.8674	10	-0.591776	-0.579429	-0.666924	0.455245	0.0906008	0.401388	0.39989
chr1	2410001	2415000	3.88886	10	-0.799406	-0.815833	-1.1016	0.514445	0.00832505	0.226329	0.0365235
chr1	2415001	2420000	3.90388	10	-0.820206	-0.906608	-1.04878	0.62683	0.0297304	0.548886	0.303199
chr1	2420001	2425000	3.92049	10	-0.306572	-0.512713	-0.562236	0.379836	0.0796233	0.705182	0.43024
chr1	2425001	2430000	3.93729	10	-0.606183	-0.816333	-0.891396	0.432309	0.194221	0.560896	0.269092
chr1	2430001	2435000	3.95287	10	-0.750713	-1.09686	-1.11889	0.36126	0.202326	0.572232	0.363546
chr1	2455001	2460000	4.16002	10	-0.844071	-0.943928	-1.12217	0.533665	0.167718	0.513568	0.400163
chr1	2460001	2465000	4.21974	10	-0.746762	-0.788501	-1.07722	0.532092	0.178934	0.552248	0.279371
chr1	2480001	2485000	4.44171	10	-0.823767	-0.922521	-0.996529	0.627692	0.255383	0.437106	0.367677
chr1	2490001	2495000	4.50984	10	-0.585106	-0.994444	-0.983894	0.515397	0.189181	0.357759	0.236786
chr1	2500001	2505000	4.5924	10	-0.853407	-1.09667	-1.25906	0.415777	0.0656701	0.256921	0.190753
chr1	2505001	2510000	4.64813	10	-0.843759	-0.96737	-1.11303	0.411417	0.056061	0.458875	0.109138
chr1	2510001	2515000	4.70098	10	-0.808453	-0.948382	-1.00712	0.653459	0.221527	0.420416	0.417936
chr1	2515001	2520000	4.74155	10	-0.712467	-0.879925	-1.0583	0.625475	0.244496	0.454253	0.377777
chr1	2520001	2525000	4.76045	10	-0.611356	-0.746305	-0.661524	0.495307	0.166991	0.408767	0.461132
chr1	2530001	2535000	4.81385	10	-0.739877	-0.76195	-1.06861	0.467765	0.0437893	0.359681	0.302381
chr1	2535001	2540000	4.8508	10	-0.642844	-0.721169	-0.832105	0.44826	0.112987	0.397034	0.119918
chr1	2540001	2545000	4.87467	10	-0.720057	-1.03793	-0.951995	0.541661	0.0143444	0.303165	0.173304
chr1	2545001	2550000	4.8705	10	-0.763393	-1.05611	-0.958165	0.435895	0.0345177	0.240455	0.010283
chr1	2550001	2555000	4.84957	10	-0.561569	-0.851086	-0.810567	0.522897	0.227552	0.424513	0.219945
chr1	2555001	2560000	4.82837	10	-0.843745	-0.986722	-0.994579	0.581023	0.22165	0.425721	0.143011
chr1	2560001	2565000	4.79983	10	-0.898592	-1.00104	-1.05266	0.630375	0.142902	0.392116	0.232018
chr1	2565001	2570000	4.75688	10	-0.690771	-0.678356	-0.822812	0.409067	0.0914871	0.177593	0.123259
chr1	2570001	2575000	4.69245	10	-0.379117	-0.326606	-0.496777	0.267173	0.0526258	0.40931	0.314031
chr1	2575001	2580000	4.60653	10	-0.494431	-0.631211	-0.731043	0.334246	0.100501	0.366021	0.289415
chr1	2585001	2590000	4.3914	10	-0.791858	-0.858707	-0.979591	0.440586	0.123492	0.0941872	-0.0285044
chr1	2590001	2595000	4.26684	10	-0.860813	-0.939413	-0.986588	0.637673	0.214359	0.267058	0.0881799
chr1	2600001	2605000	3.9954	10	-0.447668	-0.610947	-0.65757	0.403917	0.130266	0.275032	0.309975
chr1	2605001	2610000	3.83107	10	-0.370184	-0.505978	-0.40313	0.476315	0.231027	0.109551	0.0578277
chr1	2610001	2615000	3.63009	9	-0.40847	-0.568011	-0.481254	0.378113	0.187927	0.0929033	0.0565007
chr1	2620001	2625000	3.18049	9	-0.308411	-0.403838	-0.482648	0.0812844	0.161284	0.208314	0.277708
chr1	2625001	2630000	2.963	9	-0.325376	-0.531382	-0.370899	0.2754	0.209881	0.159517	0.170623
chr1	2630001	2635000	2.77114	9	-0.711227	-0.765028	-0.847443	0.591034	0.276038	0.114288	0.00743628
chr1	2635001	2640000	2.5588	8	-0.590282	-0.664825	-0.864384	0.432377	0.338901	0.0634481	0.0479723
chr1	2640001	2645000	2.30178	8	-0.759871	-0.938968	-1.07477	0.482565	0.340581	-0.136802	-0.240142
chr1	2645001	2650000	2.04851	8	-0.515573	-0.644135	-0.63704	0.139357	0.254812	-0.0504816	0.180546
chr1	2650001	2655000	1.84743	8	-1.11946	-1.25218	-1.23172	-0.0317926	0.435286	-0.457349	-0.249036
chr1	2655001	2660000	1.66919	8	-0.775752	-0.865526	-0.924728	0.00137861	0.323426	-0.348968	-0.165882
chr1	2660001	2665000	1.46565	7	0	0	0	0	0	0	0
chr1	2665001	2670000	1.25701	7	0	0	0	0	0	0	0
chr1	2670001	2675000	1.06348	7	0	0	0	0	0	0	0
chr1	2675001	2680000	0.905285	7	0	0	0	0	0	0	0
chr1	2680001	2685000	0.763346	6	-0.486013	-0.63028	-0.820752	0.00334811	0.437741	-0.400551	-0.450149
chr1	2685001	2690000	0.614794	6	-0.703189	-0.862494	-0.975297	-0.107988	0.386221	-0.512676	-0.699303
chr1	2690001	2695000	0.474134	6	-0.173929	-0.258679	-0.237733	-0.0361166	0.119366	-0.0990922	-0.192612
chr1	2695001	2700000	0.355873	6	-0.0710801	-0.0490142	-0.138131	-0.000827327	0.0924622	-0.0394866	-0.103687
chr1	2740001	2745000	0.196405	6	0	0	0	0	0	0	0
chr1	2745001	2750000	0.212297	6	-0.258725	-0.252203	-0.379796	-0.00950176	0.13577	-0.151535	-0.24451
chr1	2750001	2755000	0.221648	6	-0.386639	-0.425689	-0.68171	-0.033237	0.223119	-0.210861	-0.541384
chr1	2755001	2760000	0.220841	6	-0.091637	-0.0762749	-0.214189	-0.0131245	0.0353433	-0.0644655	-0.132232
chr1	2760001	2765000	0.206259	6	-0.0726069	-0.0578262	-0.129769	0.000843536	0.0294646	-0.0687189	-0.0750058
chr1	2765001	2770000	0.179874	6	-0.146362	-0.0800968	-0.131199	0.0680416	0.166401	-0.0763741	-0.167363
chr1	2770001	2775000	0.149264	6	-0.119984	-0.159551	-0.1474	0.0449285	0.14526	-0.0854463	-0.100337
chr1	2775001	2780000	0.119224	6	-0.464306	-0.340796	-0.349597	0.0961573	0.294395	-0.115073	-0.110404
chr1	2780001	2785000	0.0945455	5	-0.306915	-0.245952	-0.222244	0.249254	0.37189	-0.159443	-0.202565
chr1	2785001	2790000	0.0738775	5	-0.546703	-0.781002	-0.835949	0.401792	0.453966	-0.235221	-0.31581
chr1	2790001	2795000	0.053198	5	-0.330232	-0.35329	-0.267773	0.223145	0.370089	-0.151041	-0.0941457
chr1	2795001	2800000	0.0332955	5	-0.506414	-0.62584	-0.725357	0.382849	0.390509	-0.300096	-0.276155
chr1	2800001	2805000	0.0149586	5	-0.815287	-0.911117	-0.926534	0.410478	0.371478	-0.313527	-0.350311
chr1	2805001	2810000	-0.00102421	5	-0.774145	-0.951782	-0.92971	0.323073	0.446278	-0.283314	-0.184261
chr1	2810001	2815000	-0.0138643	5	-0.699435	-0.841044	-0.773971	0.368644	0.459919	-0.203949	-0.06491
chr1	2815001	2820000	-0.0227731	5	-0.360125	-0.40132	-0.51558	0.265801	0.511317	-0.145213	-0.0749223
chr1	2820001	2825000	-0.026962	5	-0.678402	-0.732052	-0.93052	0.432293	0.46185	-0.267593	-0.265997
chr1	2825001	2830000	-0.0205482	5	-0.683583	-0.817422	-0.738234	0.423407	0.529381	-0.249915	-0.0387534
chr1	2830001	2835000	-0.00209841	5	-0.766734	-0.786792	-0.904775	0.407026	0.460511	-0.190974	-0.16382
chr1	2835001	2840000	0.0225008	5	-0.517841	-0.610968	-0.777124	0.305976	0.405336	-0.269847	-0.0778246
chr1	2840001	2845000	0.047363	5	-0.250299	-0.135832	-0.182202	0.0347162	0.320268	-0.398751	-0.0481957
chr1	2845001	2850000	0.0666017	5	-0.520473	-0.54873	-0.682054	0.2226	0.373219	-0.263947	-0.246078
chr1	2850001	2855000	0.0851452	5	-0.458475	-0.518389	-0.616542	0.369352	0.464784	-0.1961	-0.23545
chr1	2855001	2860000	0.108782	6	-0.65284	-0.654205	-0.810136	0.377071	0.454336	-0.273949	-0.225784
chr1	2860001	2865000	0.132917	6	-0.885891	-0.895557	-1.06501	0.345883	0.4108	-0.356739	-0.240665
chr1	2865001	2870000	0.152955	6	-0.786733	-0.917837	-0.99175	0.381056	0.523041	-0.362005	-0.310043
chr1	2870001	2875000	0.17062	6	-0.589609	-0.863502	-1.01634	0.428359	0.429972	-0.321437	-0.23794
chr1	2875001	2880000	0.189841	6	-0.747626	-0.917948	-1.08116	0.38065	0.40695	-0.42753	-0.373307
chr1	2880001	2885000	0.209329	6	-0.763354	-0.956169	-0.892085	0.446223	0.391721	-0.299611	-0.256728
chr1	2885001	2890000	0.227794	6	-0.734777	-0.925502	-1.05085	0.410361	0.506954	-0.226696	-0.241843
chr1	2890001	2895000	0.243948	6	-0.672369	-0.776458	-0.742857	0.397279	0.473605	-0.11452	-0.193706
chr1	2895001	2900000	0.257608	6	-0.28507	-0.384668	-0.319186	0.473945	0.619473	-0.0546736	-0.177971
chr1	2900001	2905000	0.270193	6	-0.663514	-0.924146	-0.993102	0.438191	0.545255	-0.232355	-0.228101
chr1	2905001	2910000	0.282819	6	-0.656376	-0.944459	-0.945256	0.410679	0.512479	-0.34709	-0.176363
chr1	2910001	2915000	0.296602	6	-0.623318	-0.802725	-0.745143	0.401649	0.505095	-0.195998	-0.176769
chr1	2915001	2920000	0.306508	6	-0.367289	-0.455722	-0.503496	0.444761	0.472343	-0.258493	-0.141899
chr1	2920001	2925000	0.310159	6	-0.755993	-0.769347	-0.920262	0.607819	0.46204	-0.215159	-0.187174
chr1	2925001	2930000	0.312653	6	-0.783049	-0.782904	-0.869074	0.562091	0.493881	-0.221106	-0.0401024
chr1	2930001	2935000	0.319087	6	-0.712508	-0.802073	-0.918652	0.590321	0.512599	-0.30287	-0.228679
chr1	2935001	2940000	0.334559	6	-0.482638	-0.556563	-0.494125	0.478847	0.499323	-0.139898	-0.2268
chr1	2940001	2945000	0.351879	6	-0.390763	-0.465435	-0.620463	0.480238	0.486687	0.0560976	-0.203417
chr1	2945001	2950000	0.364891	6	-0.606772	-0.560755	-0.675422	0.593435	0.577284	-0.0355595	-0.0693848
chr1	2950001	2955000	0.380242	6	-0.517615	-0.584314	-0.569723	0.42125	0.568605	-0.126954	-0.0813926
chr1	2955001	2960000	0.404577	6	-0.164707	-0.174531	-0.136072	0.320228	0.246168	-0.112026	0.0483385
chr1	2960001	2965000	0.442985	6	-0.428895	-0.620176	-0.796165	0.522805	0.443113	-0.0842685	0.111612
chr1	2965001	2970000	0.49199	6	-0.598144	-0.689361	-0.997731	0.608462	0.499178	-0.0708668	-0.0852045
chr1	2970001	2975000	0.545384	6	-0.645492	-0.968999	-1.04817	0.59462	0.418602	-0.0837287	-0.185557
chr1	2975001	2980000	0.596959	6	-0.646571	-0.852622	-0.990795	0.508823	0.483639	-0.096292	-0.232817
chr1	2980001	2985000	0.64051	6	-0.706932	-0.784089	-0.788278	0.592904	0.440715	-0.201915	-0.0848882
chr1	2985001	2990000	0.692326	6	-0.700919	-0.581337	-0.847316	0.568581	0.443882	-0.0914626	-0.127281
chr1	2990001	2995000	0.760939	6	-0.483054	-0.244575	-0.477915	0.591281	0.408483	-0.0321743	0.189054
chr1	2995001	3000000	0.828502	7	-0.0814765	-0.0689302	-0.13171	0.433458	0.240888	-0.0249248	0.356653
chr1	3000001	3005000	0.877171	7	-0.604177	-0.840461	-0.810278	0.690341	0.48046	-0.164202	0.0559814
chr1	3005001	3010000	0.914832	7	-0.429854	-0.631189	-0.423231	0.47392	0.535143	0.0415146	0.213577
chr1	3010001	3015000	0.957538	7	-0.682052	-0.847309	-0.863006	0.604709	0.46789	-0.0307975	0.010224
chr1	3015001	3020000	0.999689	7	-0.637715	-0.78272	-1.04836	0.637381	0.494321	0.0982699	0.0244113
chr1	3020001	3025000	1.03568	7	-0.60292	-0.727762	-0.854948	0.551845	0.495212	0.0448267	0.180268
chr1	3025001	3030000	1.05992	7	-0.624588	-0.63907	-0.895504	0.604836	0.426517	0.192494	0.108328
chr1	3030001	3035000	1.06983	7	-0.596805	-0.85819	-0.753011	0.720864	0.453785	0.268914	0.107923
chr1	3035001	3040000	1.07017	7	-0.587976	-0.516498	-0.528087	0.749905	0.511073	0.0757029	0.231561
chr1	3040001	3045000	1.06635	7	-0.106783	-0.107156	-0.22562	0.496026	0.269749	0.11798	0.230601
chr1	3045001	3050000	1.06378	7	0.167677	0.18593	0.0570386	0.366339	0.136368	0.348751	0.227269
chr1	3050001	3055000	1.05284	7	-0.518982	-0.438349	-0.68487	0.704784	0.438081	0.198626	0.0503231
chr1	3055001	3060000	1.02606	7	-0.284354	-0.569307	-0.555631	0.396493	0.40294	0.223401	0.250038
chr1	3060001	3065000	0.992132	7	-0.594369	-0.816828	-1.03798	0.800176	0.424041	0.244356	0.0713552
chr1	3065001	3070000	0.959757	7	-0.793235	-1.0596	-1.08225	0.633096	0.321769	0.0643954	-0.0211361
chr1	3070001	3075000	0.937621	7	-0.680575	-1.09462	-1.05072	0.767548	0.270985	-0.266285	-0.155395
chr1	3075001	3080000	0.914799	7	-0.664196	-0.870382	-0.819041	0.694901	0.513509	-0.156072	-0.0354818
chr1	3080001	3085000	0.881685	7	-0.940685	-0.875649	-1.00366	0.509922	0.404388	-0.310518	-0.0511314
chr1	3085001	3090000	0.848946	7	-0.612667	-0.705002	-0.819832	0.480221	0.278082	-0.296392	-0.0787706
chr1	3090001	3095000	0.827248	6	NA	NA	NA	0.469693	NA	-0.357756	NA
chr1	3095001	3100000	0.815646	6	-0.848099	-0.905814	-1.01544	0.410367	0.329541	-0.426233	-0.0990339
chr1	3100001	3105000	0.806006	6	-0.697146	-0.797612	-0.91217	0.460849	0.48573	-0.339782	-0.133968
chr1	3105001	3110000	0.798213	6	-0.527501	-0.746895	-0.866172	0.3667	0.408273	-0.415795	-0.342669
chr1	3110001	3115000	0.792153	6	-0.618083	-0.803291	-0.846815	0.374431	0.402957	-0.366775	-0.306401
chr1	3115001	3120000	0.787709	6	-0.691356	-0.651381	-0.797349	0.257433	0.518169	-0.326012	-0.395753
chr1	3120001	3125000	0.782578	6	-0.689184	-0.830812	-0.819683	0.297853	0.523803	-0.276893	-0.361155
chr1	3125001	3130000	0.776547	6	-0.645977	-0.678416	-0.868671	0.179442	0.346882	-0.312039	-0.354237
chr1	3130001	3135000	0.772638	6	-0.659202	-0.731828	-0.816199	0.318476	0.268414	-0.359204	-0.376679
chr1	3135001	3140000	0.773873	6	-0.702848	-0.978091	-1.05235	0.289117	0.421875	-0.593984	-0.400182
chr1	3140001	3145000	0.778714	6	-0.562081	-0.927804	-0.881047	0.204546	0.329741	-0.389011	-0.365301
chr1	3145001	3150000	0.784243	6	-0.521006	-0.745377	-0.925012	0.192147	0.373979	-0.46559	-0.488445
chr1	3150001	3155000	0.791411	6	-0.665207	-0.654304	-1.02526	0.12859	0.323283	-0.539822	-0.376104
chr1	3155001	3160000	0.801167	6	-0.55491	-0.746912	-0.776012	0.0756207	0.212084	-0.356392	-0.472916
chr1	3160001	3165000	0.814464	6	-0.5951	-0.830765	-0.797325	0.0734062	0.431516	-0.30985	-0.535072
chr1	3165001	3170000	0.832251	7	-0.590668	-0.813679	-0.866554	0.208483	0.402166	-0.373443	-0.511479
chr1	3170001	3175000	0.855481	7	-0.598085	-0.850032	-0.895126	0.112121	0.319356	-0.487753	-0.522221
chr1	3175001	3180000	0.885105	7	-0.685155	-0.612388	-0.913073	0.0418924	0.295637	-0.522942	-0.638419
chr1	3180001	3185000	0.925472	7	-0.524111	-0.553832	-0.798887	-0.0887435	0.32206	-0.563425	-0.473802
chr1	3185001	3190000	0.97662	7	-0.612754	-0.865832	-0.878314	-0.0923941	0.316631	-0.451053	-0.458638
chr1	3190001	3195000	1.03303	7	-0.619156	-0.866854	-0.885268	-0.0630643	0.282142	-0.341553	-0.407004
chr1	3195001	3200000	1.08916	7	-0.711085	-0.91945	-0.956795	0.112621	0.223474	-0.607737	-0.361433
chr1	3200001	3205000	1.13952	7	-0.8108	-0.718065	-1.03185	0.0374825	0.277519	-0.588221	-0.53386
chr1	3205001	3210000	1.19305	7	-0.59751	-0.635828	-0.87088	0.0307973	0.367403	-0.43549	-0.339125
chr1	3210001	3215000	1.25634	7	-0.604808	-0.723676	-0.754424	-0.0235183	0.299457	-0.350877	-0.398299
chr1	3215001	3220000	1.32028	7	-0.862541	-0.815588	-1.00901	-0.0909806	0.265132	-0.341779	-0.5561
chr1	3220001	3225000	1.37575	7	-0.680828	-0.705841	-0.735691	-0.0539702	0.322914	-0.403964	-0.497016
chr1	3225001	3230000	1.42536	7	-0.634968	-0.612388	-0.792524	0.0553675	0.212663	-0.465486	-0.36827
chr1	3230001	3235000	1.47691	7	-0.550159	-0.666048	-0.715106	-0.00725821	0.203329	-0.348136	-0.340476
chr1	3235001	3240000	1.52912	7	-0.723446	-0.892927	-0.871337	0.00407791	0.305114	-0.453948	-0.468239
chr1	3240001	3245000	1.58069	7	-0.666456	-0.772946	-0.885015	-0.14091	0.31444	-0.329287	-0.407206
chr1	3245001	3250000	1.63033	8	-0.642233	-0.745414	-0.732336	-0.0944693	0.273317	-0.285263	-0.414788
chr1	3250001	3255000	1.67281	8	-0.500905	-0.554046	-0.533976	0.035919	0.21605	-0.40896	-0.428636
chr1	3255001	3260000	1.70867	8	-0.50244	-0.559453	-0.539592	-0.119829	0.181858	-0.374507	-0.367785
chr1	3260001	3265000	1.74529	8	-0.652363	-0.760976	-0.859953	-0.121812	0.169712	-0.519012	-0.597975
chr1	3265001	3270000	1.79007	8	-0.560506	-0.837913	-0.924131	-0.0912499	0.287283	-0.449868	-0.618084
chr1	3270001	3275000	1.83864	8	-0.551378	-0.636597	-0.819682	-0.0266703	0.198977	-0.477221	-0.587344
chr1	3275001	3280000	1.88356	8	-0.650066	-0.804247	-0.690027	0.130269	0.27752	-0.537099	-0.528912
chr1	3280001	3285000	1.92765	8	-0.802768	-0.847045	-0.987839	-0.0130683	0.206556	-0.498293	-0.477736
chr1	3285001	3290000	1.97373	8	-0.740387	-0.876684	-1.00729	0.0446556	0.302248	-0.382896	-0.453452
chr1	3290001	3295000	2.0246	8	-0.903879	-0.915868	-0.934979	0.0576208	0.22543	-0.406588	-0.504734
chr1	3295001	3300000	2.08133	8	-0.669956	-0.794721	-0.900316	0.223733	0.201491	-0.297259	-0.395623
chr1	3300001	3305000	2.1415	8	-0.35186	-0.566375	-0.462645	0.0142506	0.110383	-0.238538	-0.335533
chr1	3305001	3310000	2.20273	8	-0.50105	-0.721691	-0.718797	-0.00152813	0.178408	-0.246263	-0.297729
chr1	3310001	3315000	2.26262	8	-0.616659	-0.879269	-0.896342	0.104245	0.303832	-0.361548	-0.523729
chr1	3315001	3320000	2.32439	8	-0.414048	-0.73315	-0.671021	-0.0562161	0.216074	-0.309592	-0.394949
chr1	3320001	3325000	2.39087	8	-0.555205	-0.622009	-0.710525	0.251006	0.274409	-0.243792	-0.398805
chr1	3325001	3330000	2.45915	8	-0.767665	-0.856027	-0.994609	0.199702	0.261834	-0.403608	-0.322543
chr1	3330001	3335000	2.52631	8	-0.84541	-0.662373	-0.885285	0.20639	0.268034	-0.220021	-0.258965
chr1	3335001	3340000	2.58942	8	-0.496774	-0.403937	-0.50689	0.166981	0.22406	-0.355472	-0.166785
chr1	3340001	3345000	2.65304	8	-0.388532	-0.559862	-0.55491	0.230538	0.235271	-0.207914	-0.191527
chr1	3345001	3350000	2.72143	8	-0.727503	-0.789764	NA	0.0700824	NA	-0.291699	NA
chr1	3350001	3355000	2.79122	9	-0.674465	-0.932014	-0.921172	0.135542	0.137038	-0.250929	-0.412933
chr1	3360001	3365000	2.92158	9	-0.652502	-0.759983	-0.978649	0.299778	0.223401	-0.149531	-0.139772
chr1	3365001	3370000	2.98077	9	-0.495405	-0.607271	-0.625931	0.196835	0.226205	-0.196112	-0.0646604
chr1	3370001	3375000	3.04028	9	-0.692776	-0.767448	-0.857176	0.173089	0.290945	-0.0534246	-0.0639779
chr1	3375001	3380000	3.09925	9	-0.805753	-0.832537	-1.01012	0.0976814	0.261057	-0.112294	-0.174746
chr1	3380001	3385000	3.15682	9	-0.55948	-0.558234	-0.862733	0.252389	0.130372	-0.105317	-0.258694
chr1	3385001	3390000	3.21211	9	-0.63693	-0.662359	-0.75934	0.280136	0.13819	-0.0767477	0.0858555
chr1	3390001	3395000	3.26705	9	-0.550092	-0.630263	-0.680115	0.314011	0.161414	0.0935871	0.0130603
chr1	3395001	3400000	3.32262	9	-0.61855	-0.651773	-0.650506	0.276492	0.215592	0.117624	0.214165
chr1	3400001	3405000	3.37654	9	-0.457706	-0.582084	-0.694286	0.239252	0.220582	0.197336	0.0895401
chr1	3405001	3410000	3.42655	9	-0.571648	-0.753874	-0.969761	0.353423	0.117374	0.119817	-0.0569967
chr1	3415001	3420000	3.52037	9	-0.749076	-0.736675	-0.843103	0.251471	0.158789	0.185379	0.224086
chr1	3420001	3425000	3.56623	9	-0.82072	-0.88785	-0.949747	0.507085	0.0158253	0.219947	0.313056
chr1	3435001	3440000	3.69572	9	-0.594759	-0.545692	-0.698554	0.29601	0.0687244	0.413148	0.200853
chr1	3445001	3450000	3.77208	9	-0.136842	-0.174064	-0.134285	0.100396	-0.0899701	0.462077	0.26145
chr1	3465001	3470000	3.88927	10	-0.723911	-1.01007	-1.14186	0.43007	0.0818142	0.0757653	-0.000288641
chr1	3470001	3475000	3.91215	10	-0.621503	-0.799864	-0.944879	0.350909	0.0611538	0.0478007	-0.0930863
chr1	3475001	3480000	3.93556	10	-0.757735	-0.893387	-0.957031	0.357204	-0.0360148	0.0607623	-0.0960861
chr1	3485001	3490000	3.97765	10	-0.303015	-0.319566	-0.492006	0.108422	-0.152879	0.094561	0.185174
chr1	3495001	3500000	4.00285	10	-0.756742	-0.9968	-0.91804	0.165368	0.0389956	0.0240921	-0.0728445
chr1	3505001	3510000	3.99145	10	-0.748314	-0.912652	-0.857022	0.0518473	-0.0701015	0.0646095	-0.075688
chr1	3510001	3515000	3.97142	10	-0.768514	-0.876454	-0.954974	0.183294	0.0586315	-0.0351934	-0.0995375
chr1	3535001	3540000	3.82389	10	-0.748217	-1.02528	-1.07134	0.205032	-0.0317803	0.0439825	-0.108431
chr1	3540001	3545000	3.80172	9	-0.824086	-0.975895	-0.977685	0.265754	-0.0864526	-0.0315369	-0.0928226
chr1	3550001	3555000	3.78393	9	-0.717536	-0.921747	-1.06607	0.234597	-0.0959058	0.131406	0.0865395
chr1	3565001	3570000	3.74237	9	-0.856639	-0.893658	-1.08567	-0.0469707	-0.103197	0.00655374	0.0566515
chr1	3570001	3575000	3.71935	9	-0.819637	-0.819971	-0.948193	-0.007557	-0.138	-0.0322925	-0.0858161
chr1	3575001	3580000	3.69953	9	-0.841471	-0.962304	-1.06263	0.0994832	-0.056731	0.134194	-0.157437
chr1	3585001	3590000	3.68815	9	-0.470417	-0.659865	-0.788565	0.203981	0.0191208	0.100009	-0.0585993
chr1	3590001	3595000	3.69999	9	-0.770184	-1.03753	-1.0069	0.12078	-0.142878	0.112987	0.0128605
chr1	3600001	3605000	3.7424	9	-0.726361	-0.779292	-0.918759	0.0681308	-0.0348273	0.279826	0.100255
chr1	3610001	3615000	3.80552	9	-0.693097	-0.887212	-0.837604	-0.0414924	-0.193611	0.0612747	-0.0418181
chr1	3625001	3630000	3.92781	10	-0.49953	-0.689907	-0.469526	0.0158012	-0.180957	0.295182	0.157553
chr1	3650001	3655000	4.16256	10	-0.518847	-0.711972	-0.814793	0.186361	-0.0548545	0.168918	-0.0544386
chr1	3655001	3660000	4.20838	10	-0.330689	-0.333855	-0.49144	0.266721	0.00615928	0.413197	0.309691
chr1	3670001	3675000	4.33206	10	-0.837907	-0.87266	-1.0451	0.347977	0.0494055	0.308182	0.0515779
chr1	3685001	3690000	4.42161	10	-0.805943	-0.899491	-1.07948	0.500947	0.124922	0.17439	0.27361
chr1	3695001	3700000	4.47362	10	-0.813017	-0.995544	-1.06457	0.329491	-0.0124713	0.352397	0.194568
chr1	3705001	3710000	4.53436	10	-0.798925	-0.912179	-0.989798	0.620557	0.153029	0.496576	0.312537
chr1	3715001	3720000	4.59437	10	-0.726116	-0.933715	-1.05343	0.416599	0.156428	0.492896	0.346359
chr1	3725001	3730000	4.6442	10	-0.733958	-0.833702	-1.0828	0.519205	0.204961	0.562886	0.287835
chr1	3745001	3750000	4.67544	10	-0.423207	-0.599995	-0.692974	0.352962	0.0581318	0.567061	0.44808
chr1	3750001	3755000	4.652	10	-0.452602	-0.523232	-0.742217	0.408429	-0.0294513	0.647413	0.411909
chr1	3755001	3760000	4.60862	10	-0.424598	-0.580276	-0.576775	0.5152	-0.0661116	0.623012	0.492041
chr1	3760001	3765000	4.56071	10	-0.616702	-0.641352	-0.701934	0.340804	0.0525798	0.561563	0.448511
chr1	3765001	3770000	4.5237	10	-0.673624	-0.770343	-0.832619	0.466787	0.0872236	0.501837	0.433853
chr1	3770001	3775000	4.49152	10	-0.860267	-0.927112	-0.998011	0.47708	-0.0106579	0.300721	0.13821
chr1	3780001	3785000	4.40113	10	-0.631527	-0.64757	-0.74229	0.434249	-0.023668	0.695277	0.442646
chr1	3785001	3790000	4.34863	10	-0.689641	-0.862292	-1.12741	0.495954	0.0296799	0.506043	0.542777
chr1	3795001	3800000	4.24328	10	-0.487347	-0.576259	-0.615438	0.377564	0.00249471	0.328342	0.3169
chr1	3800001	3805000	4.19613	10	-0.304232	-0.429482	-0.395547	0.339192	0.0488152	0.431575	0.526581
chr1	3805001	3810000	4.15119	10	-0.33278	-0.354426	-0.474908	0.357312	0.0443493	0.408679	0.574247
chr1	3810001	3815000	4.10459	10	-0.19565	-0.348994	-0.266162	0.380093	0.104575	0.510117	0.390592
chr1	3815001	3820000	4.05699	10	-0.52594	-0.691266	-0.676466	0.430117	0.0732474	0.375728	0.471446
chr1	3820001	3825000	4.00906	10	-0.587226	-0.572696	-0.644427	0.491633	0.0747591	0.400487	0.437494
chr1	3825001	3830000	3.96304	10	-0.461124	-0.488545	-0.60535	0.550248	0.134297	0.430169	0.500549
chr1	3830001	3835000	3.91967	10	-0.165018	-0.256791	-0.262775	0.298982	0.0925243	0.401708	0.432283
chr1	3835001	3840000	3.87739	10	-0.332842	-0.364748	-0.416759	0.200987	0.190622	0.369484	0.458761
chr1	3840001	3845000	3.83467	10	-0.328865	-0.494073	-0.449389	0.260533	0.165131	0.299577	0.408713
chr1	3850001	3855000	3.74169	9	-0.337711	-0.36104	-0.38299	0.30609	0.0960148	0.299768	0.370988
chr1	3855001	3860000	3.70655	9	-0.595043	-0.714847	-0.751969	0.298668	-0.00660741	0.0674242	0.0540877
chr1	3860001	3865000	3.68944	9	-0.235443	-0.317796	-0.384692	0.0800827	0.00400343	0.237047	0.197998
chr1	3865001	3870000	3.67123	9	-0.476229	-0.594014	-0.711889	0.245165	-0.0234594	-0.0287367	0.164703
chr1	3870001	3875000	3.63276	9	-0.593986	-0.613875	-0.647269	0.294976	0.210955	-0.0798624	0.179729
chr1	3875001	3880000	3.57279	9	-0.53051	-0.490658	-0.60732	0.0738942	0.143062	0.0560405	0.26416
chr1	3880001	3885000	3.50453	9	-0.459371	-0.663819	-0.608303	0.164952	0.0801535	0.0561776	0.230218
chr1	3885001	3890000	3.43057	9	-0.41234	-0.581253	-0.563561	0.055799	0.108894	-0.0298157	0.155247
chr1	3890001	3895000	3.3535	9	-0.434028	-0.402761	-0.564584	0.077036	0.0420157	0.0313942	0.164289
chr1	3895001	3900000	3.2759	9	-0.413095	-0.414137	-0.508195	0.132007	0.0871089	-0.0042679	-0.182703
chr1	3900001	3905000	3.18972	9	-0.523134	-0.760609	-0.687109	-0.0170467	-0.0441189	0.0164236	-0.316307
chr1	3905001	3910000	3.09127	9	-0.645988	-0.748331	-0.795984	0.164133	0.243538	-0.0377739	0.0327064
chr1	3910001	3915000	2.98974	9	-0.95103	-0.804507	-0.77362	0.132073	0.270099	-0.181365	-0.116899
chr1	3915001	3920000	2.89428	9	-0.562655	-0.521869	-0.749423	-0.0570512	0.174023	-0.104633	-0.0385644
chr1	3920001	3925000	2.80255	9	-0.434029	-0.613655	-0.722603	-0.0751835	0.167162	-0.15532	-0.0999557
chr1	3925001	3930000	2.70724	8	-0.211306	-0.359315	-0.378741	-0.0475674	0.169933	0.031808	-0.0608733
chr1	3930001	3935000	2.61012	8	-0.396858	-0.530189	-0.600976	-0.122986	0.185385	-0.0461125	-0.2068
chr1	3935001	3940000	2.51296	8	-0.347885	-0.534612	-0.466066	-0.160535	0.0814678	-0.104062	-0.0751914
chr1	3940001	3945000	2.41753	8	-0.499412	-0.7286	-0.835878	-0.0559511	0.146243	-0.29809	-0.157513
chr1	3945001	3950000	2.31294	8	-0.391284	-0.551894	-0.737422	-0.128256	0.10264	-0.278726	-0.0949911
chr1	3950001	3955000	2.19554	8	-0.330484	-0.552756	-0.618028	-0.275817	0.188922	-0.235829	-0.126735
chr1	3955001	3960000	2.0779	8	-0.476324	-0.458936	-0.63671	-0.1348	0.0748515	-0.147552	-0.264933
chr1	3960001	3965000	1.97261	8	-0.376011	-0.487954	-0.518811	-0.130256	0.0631109	-0.145125	-0.163145
chr1	3965001	3970000	1.8744	8	-0.429255	-0.423042	-0.533838	-0.159285	0.258979	-0.147352	-0.153966
chr1	3970001	3975000	1.77247	8	-0.44153	-0.275408	-0.470358	-0.102449	0.345415	-0.0505368	-0.126043
chr1	3975001	3980000	1.67104	8	-0.536393	-0.556798	-0.740242	-0.123095	0.223091	-0.177782	-0.245719
chr1	3980001	3985000	1.57436	7	-0.392359	-0.475802	-0.634176	-0.13765	0.0552419	-0.131692	-0.350107
chr1	3985001	3990000	1.48668	7	-0.519955	-0.390248	-0.524823	-0.0484623	0.253013	-0.28353	-0.31366
chr1	3990001	3995000	1.40589	7	-0.550355	-0.399688	-0.647087	-0.125991	0.208755	-0.304886	-0.417268
chr1	3995001	4000000	1.32741	7	-0.624914	-0.607968	-0.721443	0.0164689	0.102056	-0.233438	-0.3215
chr1	4000001	4005000	1.25175	7	-0.779666	-0.701786	-0.7531	-0.0713506	0.148916	-0.468963	-0.302418
chr1	4005001	4010000	1.17941	7	-0.615902	-0.660774	-0.719717	-0.0734529	0.106666	-0.541762	-0.43092
chr1	4010001	4015000	1.11586	7	-0.274289	-0.3769	-0.456569	-0.174682	0.00209564	-0.488685	-0.166301
chr1	4015001	4020000	1.06262	7	-0.422073	-0.351999	-0.488856	-0.174747	0.0122706	-0.482315	-0.404812
chr1	4020001	4025000	1.01425	7	-0.537731	-0.47169	-0.522944	-0.173749	0.236533	-0.465377	-0.322968
chr1	4025001	4030000	0.965333	7	-0.349561	-0.202778	-0.217468	-0.192856	0.12133	-0.232432	-0.413029
chr1	4030001	4035000	0.910441	7	-0.266978	-0.265977	-0.230391	-0.225999	0.219698	-0.39861	-0.470756
chr1	4035001	4040000	0.860492	7	-0.146804	-0.0400756	-0.125085	-0.466597	0.00100734	-0.268196	-0.24776
chr1	4040001	4045000	0.822193	6	-0.290597	-0.39256	-0.381775	-0.385789	-0.0628189	-0.389182	-0.419073
chr1	4045001	4050000	0.783797	6	-0.526221	-0.764623	-0.828189	-0.370246	0.0149711	-0.456208	-0.571017
chr1	4050001	4055000	0.733557	6	-0.493156	-0.781926	-0.762754	-0.214331	0.00262637	-0.533279	-0.664038
chr1	4055001	4060000	0.674609	6	-0.666254	-0.67804	-0.692264	-0.209124	-0.0111154	-0.439805	-0.568251
chr1	4060001	4065000	0.617075	6	-0.694636	-0.62555	-0.82866	-0.374378	0.138222	-0.450913	-0.632938
chr1	4065001	4070000	0.559686	6	-0.382174	-0.333364	-0.667434	-0.32422	0.20668	-0.346795	-0.543191
chr1	4070001	4075000	0.501172	6	-0.397802	-0.355193	-0.550117	-0.374984	0.117298	-0.257915	-0.38581
chr1	4075001	4080000	0.440265	6	-0.47241	-0.603757	-0.664414	-0.238891	0.193857	-0.363759	-0.600743
chr1	4080001	4085000	0.375694	6	-0.453868	-0.49437	-0.642327	-0.231369	0.276304	-0.365591	-0.64091
chr1	4085001	4090000	0.306192	6	-0.65951	-0.650513	-0.805536	-0.22811	0.161353	-0.495847	-0.438903
chr1	4090001	4095000	0.230488	6	-0.629006	-0.690415	-0.5988	-0.248952	0.0529745	-0.505463	-0.534773
chr1	4095001	4100000	0.144518	6	-0.241316	-0.286853	-0.132128	-0.221457	0.013255	-0.373651	-0.541505
chr1	4100001	4105000	0.0485094	5	-0.162062	-0.240644	-0.181737	-0.240531	0.0512678	-0.173118	-0.359603
chr1	4105001	4110000	-0.0523693	5	-0.336424	-0.657839	-0.693141	-0.203347	0.0956143	-0.312982	-0.514313
chr1	4110001	4115000	-0.152948	5	-0.324784	-0.526763	-0.598531	-0.475264	0.0824878	-0.399496	-0.424529
chr1	4115001	4120000	-0.248059	5	-0.47925	-0.538954	-0.461541	-0.230438	0.167616	-0.557104	-0.54762
chr1	4120001	4125000	-0.3534	5	-0.613302	-0.599756	-0.605287	-0.0916092	0.198632	-0.367738	-0.547235
chr1	4125001	4130000	-0.475885	5	-0.442888	-0.607913	-0.645338	-0.00405113	0.133009	-0.464013	-0.622788
chr1	4130001	4135000	-0.597162	5	-0.628621	-0.688088	-0.665568	-0.162772	0.103258	-0.487688	-0.604038
chr1	4135001	4140000	-0.698879	5	-0.577237	-0.496026	-0.718115	-0.238598	0.1498	-0.487758	-0.603637
chr1	4140001	4145000	-0.789901	4	-0.480062	-0.560439	-0.71316	-0.225072	0.197955	-0.406152	-0.548046
chr1	4145001	4150000	-0.887009	4	-0.411574	-0.509688	-0.546764	-0.368288	0.204758	-0.335342	-0.515397
chr1	4150001	4155000	-0.983734	4	-0.563599	-0.649883	-0.727662	-0.159582	0.0118465	-0.602087	-0.604803
chr1	4155001	4160000	-1.0736	4	-0.599915	-0.62829	-0.695273	-0.287526	0.111836	-0.54578	-0.651962
chr1	4160001	4165000	-1.15015	4	-0.551782	-0.759396	-0.844252	-0.197561	0.0300048	-0.592203	-0.645702
chr1	4165001	4170000	-1.21105	4	-0.523736	-0.582354	-0.503292	-0.321524	0.119142	-0.628864	-0.587289
chr1	4170001	4175000	-1.26246	4	-0.554777	-0.665364	-0.718588	-0.0481744	0.102257	-0.502062	-0.538827
chr1	4175001	4180000	-1.31061	4	-0.51787	-0.645853	-0.640773	-0.204532	0.0362589	-0.418584	-0.525866
chr1	4180001	4185000	-1.36174	4	-0.315589	-0.405519	-0.39152	-0.442133	0.202343	-0.387063	-0.635404
chr1	4185001	4190000	-1.40255	4	-0.271291	-0.162099	-0.210661	-0.25872	0.095056	-0.463249	-0.614249
chr1	4190001	4195000	-1.42254	4	0.168562	0.143768	0.209601	-0.370934	-0.131549	-0.14407	-0.5496
chr1	4200001	4205000	-1.44156	4	-0.251175	-0.149744	-0.0493171	-0.278222	0.0462563	-0.346106	-0.498109
chr1	4205001	4210000	-1.46137	4	-0.440828	-0.50453	-0.287021	-0.340673	0.15169	-0.334629	-0.587673
chr1	4210001	4215000	-1.50188	4	-0.565642	-0.715694	-0.567595	-0.237458	0.0723443	-0.36721	-0.655778
chr1	4215001	4220000	-1.55911	4	-0.685552	-0.739381	-0.780882	-0.0872769	0.00267823	-0.498138	-0.655653
chr1	4220001	4225000	-1.62011	4	-0.461141	-0.36283	-0.299276	-0.173444	-0.0084515	-0.596618	-0.63888
chr1	4225001	4230000	-1.68177	4	-0.289673	-0.0884936	-0.196271	-0.315305	-0.0768262	-0.323746	-0.628599
chr1	4230001	4235000	-1.74098	4	-0.265624	-0.174118	-0.28109	-0.246731	-0.126214	-0.477464	-0.51569
chr1	4235001	4240000	-1.80354	3	-0.203434	-0.0697897	-0.146253	-0.392414	-0.154716	-0.478475	-0.601809
chr1	4240001	4245000	-1.87371	3	0.286064	0.281203	0.247715	-0.326068	0.00658533	-0.286949	-0.610082
chr1	4245001	4250000	-1.94604	3	0.133009	0.0248117	0.052432	-0.336816	-0.0814175	-0.399379	-0.587364
chr1	4250001	4255000	-2.01511	3	0.075842	-0.173236	-0.0846121	-0.381101	-0.116227	-0.468262	-0.573209
chr1	4255001	4260000	-2.07549	3	-0.251562	-0.345097	-0.306972	-0.267901	0.0854572	-0.452554	-0.53173
chr1	4260001	4265000	-2.13862	3	-0.215301	-0.0785442	-0.12339	-0.367025	0.0436723	-0.325467	-0.601151
chr1	4265001	4270000	-2.21255	3	-0.396952	-0.312039	-0.470316	-0.148167	0.12491	-0.356476	-0.592956
chr1	4270001	4275000	-2.28681	3	-0.392346	-0.462085	-0.574812	-0.154334	0.0397404	-0.469439	-0.662441
chr1	4275001	4280000	-2.35089	3	-0.351733	-0.468867	-0.351409	-0.335867	0.146548	-0.508403	-0.661458
chr1	4280001	4285000	-2.4035	3	-0.200694	-0.300121	-0.268015	-0.299365	0.101099	-0.278119	-0.533805
chr1	4290001	4295000	-2.49714	3	-0.162195	-0.150257	-0.144644	-0.0927288	-0.0382863	-0.371226	-0.536811
chr1	4295001	4300000	-2.54201	3	-0.53826	-0.509403	-0.648173	-0.0853201	0.200299	-0.447779	-0.711142
chr1	4300001	4305000	-2.58812	3	-0.441378	-0.648252	-0.687204	-0.0910392	0.183147	-0.478848	-0.579434
chr1	4305001	4310000	-2.63739	3	-0.601795	-0.563765	-0.605934	-0.158815	0.0740482	-0.452122	-0.727651
chr1	4310001	4315000	-2.67682	2	-0.31531	-0.221675	-0.311552	-0.228026	0.029327	-0.479862	-0.626786
chr1	4315001	4320000	-2.70217	2	-0.302775	-0.313156	-0.398768	-0.0960828	0.126824	-0.479023	-0.564472
chr1	4320001	4325000	-2.72845	2	-0.424774	-0.447828	-0.514516	-0.0788211	0.0375528	-0.493074	-0.730977
chr1	4325001	4330000	-2.77071	2	-0.423152	-0.543139	-0.667719	-0.19358	0.036155	-0.494473	-0.646824
chr1	4330001	4335000	-2.82447	2	-0.515366	-0.664608	-0.865254	-0.116148	0.0856614	-0.503367	-0.786699
chr1	4335001	4340000	-2.87663	2	-0.394217	-0.65761	-0.581565	-0.0351111	0.147386	-0.452506	-0.746434
chr1	4340001	4345000	-2.92923	2	-0.614096	-0.768665	-0.760181	-0.0638782	0.185568	-0.615591	-0.670735
chr1	4345001	4350000	-2.98433	2	-0.237981	-0.25458	-0.365168	-0.231548	0.0806582	-0.481503	-0.566075
chr1	4350001	4355000	-3.04398	2	-0.424855	-0.434975	-0.470631	-0.175482	0.0565378	-0.582548	-0.592722
chr1	4355001	4360000	-3.1152	2	-0.403018	-0.435658	-0.570335	-0.12028	0.160651	-0.543948	-0.525097
chr1	4365001	4370000	-3.28416	1	-0.365109	-0.324396	-0.371009	-0.0980162	0.0766978	-0.384445	-0.622648
chr1	4370001	4375000	-3.36518	1	-0.472989	-0.405935	-0.490171	-0.1235	-0.0654034	-0.41945	-0.70469
chr1	4375001	4380000	-3.43272	1	-0.37173	-0.456775	-0.441844	-0.215881	-0.0596915	-0.324956	-0.762698
chr1	4380001	4385000	-3.49904	1	-0.209973	-0.172674	-0.233273	-0.356947	0.0147792	-0.337184	-0.491179
chr1	4385001	4390000	-3.57704	1	-0.308669	-0.493936	-0.450155	-0.256284	0.18853	-0.413677	-0.584282
chr1	4390001	4395000	-3.65938	1	-0.0945798	-0.152086	-0.121244	-0.31741	0.0228937	-0.354853	-0.59862
chr1	4400001	4405000	-3.80774	1	-0.328548	-0.489064	-0.333493	-0.148972	0.0846118	-0.64021	-0.464264
chr1	4405001	4410000	-3.85907	1	-0.387375	-0.52535	-0.553066	-0.194294	0.154637	-0.483923	-0.517684
chr1	4420001	4425000	-3.97557	1	-0.362815	-0.542852	-0.484728	-0.165289	-0.0257201	-0.527604	-0.495986
chr1	4425001	4430000	-4.01053	1	0.0493552	0.224585	0.205065	0.0220808	-0.0109231	-0.467178	-0.655372
chr1	4430001	4435000	-4.04214	1	-0.440637	-0.263596	-0.356835	-0.123505	0.0282506	-0.466254	-0.516166
chr1	4445001	4450000	-4.10834	1	-0.261465	-0.411122	-0.367634	-0.393887	0.163322	-0.46505	-0.457102
chr1	4455001	4460000	-4.11046	1	-0.268422	-0.413557	-0.356333	-0.121475	0.0861986	-0.437027	-0.531607
chr1	4460001	4465000	-4.09672	1	-0.552154	-0.657507	-0.601878	-0.0702023	0.103325	-0.433179	-0.582128
chr1	4475001	4480000	-4.02394	1	-0.240725	-0.331114	-0.355306	-0.208902	0.0301814	-0.467264	-0.529174
chr1	4490001	4495000	-3.95195	1	-0.31079	-0.471034	-0.510299	-0.21151	0.258649	-0.573585	-0.564721
chr1	4495001	4500000	-3.93885	1	-0.311975	-0.180889	-0.460405	-0.215544	0.115853	-0.52115	-0.643175
chr1	4500001	4505000	-3.92365	1	-0.526923	-0.549626	-0.55593	-0.169384	0.0140991	-0.542424	-0.544885
chr1	4515001	4520000	-3.82818	1	-0.500998	-0.634951	-0.70927	-0.0830538	0.0669849	-0.400165	-0.555638
chr1	4535001	4540000	-3.70713	1	0.205468	0.210629	0.152463	-0.162371	-0.136513	-0.266237	-0.577861
chr1	4540001	4545000	-3.69988	1	-0.122473	-0.0601247	0.0264654	-0.326667	-0.00130548	-0.302634	-0.53363
chr1	4550001	4555000	-3.70717	1	-0.149363	-0.197263	-0.274285	-0.178367	0.139855	-0.560694	-0.602212
chr1	4555001	4560000	-3.71455	1	-0.112905	-0.0479065	-0.122597	-0.274423	0.105422	-0.499656	-0.598623
chr1	4570001	4575000	-3.73895	1	-0.319768	-0.535076	-0.328358	-0.161367	-0.108674	-0.398291	-0.359616
chr1	4575001	4580000	-3.74431	1	-0.0790638	-0.17499	-0.155938	-0.150907	-0.155464	-0.517125	-0.416711
chr1	4585001	4590000	-3.74451	1	-0.17087	-0.442458	-0.380208	-0.139234	-0.0443036	-0.408128	-0.444491
chr1	4590001	4595000	-3.74155	1	-0.531475	-0.735453	-0.549708	-0.280056	0.110008	-0.580575	-0.589796
chr1	4610001	4615000	-3.74853	1	-0.43861	-0.614073	-0.532412	-0.00214225	0.0428779	-0.56179	-0.606666
chr1	4635001	4640000	-3.74866	1	-0.47152	-0.700073	-0.519656	-0.190638	0.0963535	-0.491649	-0.551217
chr1	4640001	4645000	-3.74076	1	-0.159689	-0.30916	-0.164371	-0.304733	0.105779	-0.342065	-0.573924
chr1	4665001	4670000	-3.66743	1	-0.552122	-0.583959	-0.81883	-0.114422	0.28261	-0.508216	-0.557657
chr1	4680001	4685000	-3.6085	1	-0.35937	-0.550168	-0.625638	-0.121045	0.114098	-0.531606	-0.539491
chr1	4695001	4700000	-3.5465	1	-0.491929	-0.54748	-0.485836	-0.0993955	0.138299	-0.435353	-0.721334
chr1	4700001	4705000	-3.52631	1	-0.550436	-0.630977	-0.608887	-0.155447	0.0923895	-0.587827	-0.53625
chr1	4735001	4740000	-3.41694	1	-0.52419	-0.526108	-0.622081	-0.1296	0.049431	-0.723321	-0.569423
chr1	4745001	4750000	-3.38985	1	-0.431089	-0.518597	-0.560604	-0.0974888	0.0963843	-0.587508	-0.644369
chr1	4755001	4760000	-3.3532	1	-0.512242	-0.578801	-0.589289	-0.13363	0.162761	-0.452417	-0.354801
chr1	4765001	4770000	-3.31797	1	-0.408162	-0.42895	-0.635932	0.022719	0.0793222	-0.363827	-0.479361
chr1	4775001	4780000	-3.29516	1	-0.523723	-0.545879	-0.399755	-0.127996	0.139359	-0.526916	-0.539555
chr1	4850001	4855000	-3.20486	1	-0.198213	-0.235774	-0.223177	-0.266625	0.047017	-0.426136	-0.447211
chr1	4855001	4860000	-3.20018	1	-0.0462874	-0.187995	-0.222109	-0.269403	-0.135284	-0.456151	-0.52766
chr1	4860001	4865000	-3.19579	1	-0.213425	-0.153267	NA	-0.237938	NA	-0.311265	NA
chr1	4880001	4885000	-3.18145	2	-0.239378	-0.281377	-0.347324	-0.320667	0.0187823	-0.426688	-0.289539
chr1	4890001	4895000	-3.17651	2	-0.209345	-0.179581	-0.364765	-0.359749	-0.0483881	-0.356944	-0.449585
chr1	4905001	4910000	-3.1778	2	-0.316841	-0.224029	-0.410025	-0.124256	0.0537025	-0.434162	-0.536539
chr1	4925001	4930000	-3.19728	1	-0.306265	-0.334013	-0.399045	-0.230156	-0.0814012	-0.50821	-0.404581
chr1	4965001	4970000	-3.2568	1	-0.374543	-0.454355	-0.684606	-0.098529	-0.010153	-0.430618	-0.448394
chr1	4970001	4975000	-3.2629	1	-0.405345	-0.465414	-0.601378	-0.14715	0.104288	-0.472554	-0.597945
chr1	4975001	4980000	-3.26803	1	-0.470768	-0.591948	-0.555313	-0.0660592	0.0340188	-0.594915	-0.47782
chr1	4980001	4985000	-3.27219	1	-0.337962	-0.340315	-0.375577	-0.202956	0.0130169	-0.504012	-0.452123
chr1	5010001	5015000	-3.28726	1	-0.316799	-0.30624	-0.318382	-0.215012	0.0578621	-0.374715	-0.497244
chr1	5015001	5020000	-3.28992	1	-0.281218	-0.207386	-0.241387	-0.165853	0.0311096	-0.34678	-0.420889
chr1	5040001	5045000	-3.31539	1	-0.28213	-0.195514	-0.405013	-0.313843	0.063126	-0.532632	-0.51158
chr1	5060001	5065000	-3.31961	1	0.29966	0.192474	0.3573	-0.269337	-0.180149	-0.278294	-0.536172
chr1	5065001	5070000	-3.31597	1	0.0364318	-0.223333	0.103724	-0.33749	-0.0404312	-0.391964	-0.452861
chr1	5080001	5085000	-3.30949	1	-0.159785	-0.258024	-0.241426	-0.217264	0.022602	-0.362405	-0.638058
chr1	5090001	5095000	-3.31868	1	0.1878	0.210951	0.321938	-0.455234	-0.172395	-0.325287	-0.473238
chr1	5105001	5110000	-3.36733	1	0.139404	0.0599638	0.0843136	-0.328739	-0.168563	-0.373065	-0.533005
chr1	5110001	5115000	-3.39173	1	-0.289543	-0.414604	-0.506687	-0.309644	0.0566687	-0.493084	-0.753394
chr1	5120001	5125000	-3.44936	1	-0.201667	-0.209383	-0.250998	-0.258431	-0.104833	-0.377615	-0.556256
chr1	5130001	5135000	-3.51493	1	-0.179886	-0.253443	-0.1964	-0.0575585	-0.0830467	-0.375244	-0.464424
chr1	5175001	5180000	-3.7852	1	0.00450518	-0.126963	-0.0577102	-0.274765	-0.0839121	-0.464807	-0.395486
chr1	5190001	5195000	-3.8828	1	-0.279734	-0.128914	-0.270987	-0.217328	0.0348748	-0.479795	-0.553274
chr1	5205001	5210000	-4.00531	1	-0.0149123	0.0549197	-0.0723446	-0.24767	-0.0336112	-0.289878	-0.463169
chr1	5210001	5215000	-4.036	1	0.260644	0.397479	0.359389	-0.244201	-0.184418	-0.339249	-0.485238
chr1	5215001	5220000	-4.05602	1	-0.0653694	0.0356039	0.0658905	-0.255936	-0.0506789	-0.357511	-0.527671
chr1	5220001	5225000	-4.06873	1	-0.382228	-0.202686	-0.302673	-0.0933464	0.0211822	-0.486184	-0.600939
chr1	5230001	5235000	-4.08912	1	0.00900361	0.00277634	-0.120369	-0.229758	-0.101388	-0.38784	-0.522948
chr1	5245001	5250000	-4.10775	1	-0.14758	-0.262396	-0.350197	-0.261065	0.0128804	-0.446373	-0.571472
chr1	5260001	5265000	-4.113	1	-0.224685	-0.360882	-0.339184	-0.216749	0.100379	-0.384313	-0.485965
chr1	5265001	5270000	-4.11197	1	-0.439105	-0.600096	-0.59333	-0.0751098	0.238657	-0.555632	-0.641862
chr1	5280001	5285000	-4.08658	1	-0.308876	-0.549879	-0.722168	-0.0699937	-0.00470785	-0.443724	-0.747453
chr1	5285001	5290000	-4.07257	1	-0.409798	-0.481528	-0.661997	-0.0769699	0.257017	-0.480717	-0.704298
chr1	5290001	5295000	-4.05796	1	-0.340092	-0.565891	-0.619101	-0.178492	0.0797002	-0.407489	-0.533192
chr1	5300001	5305000	-4.03217	1	-0.075259	-0.140892	-0.235416	-0.219917	0.0457247	-0.562491	-0.310418
chr1	5310001	5315000	-4.00175	1	-0.427788	-0.569524	-0.556802	-0.236393	0.0787599	-0.528513	-0.532089
chr1	5315001	5320000	-3.98121	1	-0.0457086	-0.243456	-0.13087	-0.351334	-0.0379604	-0.326283	-0.46015
chr1	5325001	5330000	-3.93546	1	-0.234466	-0.228657	-0.299839	-0.248215	0.137896	-0.454738	-0.471957
chr1	5335001	5340000	-3.8915	1	-0.313022	-0.319765	-0.370324	-0.307802	-0.00893078	-0.367936	-0.649538
chr1	5340001	5345000	-3.87318	1	-0.602299	-0.451697	-0.525381	-0.194124	0.137282	-0.383512	-0.65194
chr1	5360001	5365000	-3.76293	1	-0.409714	-0.301477	-0.389807	-0.246481	0.20498	-0.464953	-0.607147
chr1	5365001	5370000	-3.73053	1	-0.426511	-0.333501	-0.561162	-0.16245	0.154009	-0.306547	-0.489936
chr1	5370001	5375000	-3.70052	1	-0.303644	-0.436295	-0.405187	-0.194195	0.161693	-0.523845	-0.510189
chr1	5375001	5380000	-3.67504	1	-0.277876	-0.318905	-0.395073	-0.266242	0.0641691	-0.612859	-0.636234
chr1	5390001	5395000	-3.62478	1	-0.525658	-0.471936	-0.361146	-0.136149	0.115948	-0.678106	-0.630997
chr1	5395001	5400000	-3.61386	1	-0.137426	-0.266915	-0.150241	-0.353524	-0.0126799	-0.471654	-0.497807
chr1	5405001	5410000	-3.59667	1	-0.148491	-0.366502	-0.292039	-0.195371	0.011954	-0.506627	-0.635526
chr1	5430001	5435000	-3.54908	1	-0.366399	-0.458095	-0.558596	-0.153653	0.0412181	-0.487344	-0.550825
chr1	5440001	5445000	-3.51389	1	-0.37218	-0.34418	-0.371755	-0.264688	0.193699	-0.448739	-0.557891
chr1	5450001	5455000	-3.4613	1	-0.412724	-0.50018	-0.451158	-0.10727	0.0131735	-0.493401	-0.541204
chr1	5455001	5460000	-3.42677	1	-0.344149	-0.555816	-0.567664	-0.212298	0.148901	-0.418519	-0.557979
chr1	5460001	5465000	-3.38585	1	-0.414162	-0.550017	-0.58128	-0.355772	0.0636398	-0.290217	-0.585902
chr1	5465001	5470000	-3.34094	1	-0.383291	-0.595427	-0.546609	-0.280431	-0.0668713	-0.37032	-0.576267
chr1	5485001	5490000	-3.14397	2	-0.400499	-0.587871	-0.50678	-0.180667	0.0589818	-0.55823	-0.599047
chr1	5490001	5495000	-3.0886	2	-0.430618	-0.464242	-0.256333	-0.147879	-0.0257383	-0.509239	-0.606821
chr1	5495001	5500000	-3.03008	2	-0.269757	-0.352677	-0.184759	-0.138913	0.120993	-0.483241	-0.594547
chr1	5505001	5510000	-2.90211	2	-0.571638	-0.778209	-0.719327	0.0429584	0.0579877	-0.507917	-0.732396
chr1	5510001	5515000	-2.82357	2	-0.632949	-0.743646	-0.706819	-0.107728	0.149648	-0.420002	-0.670246
chr1	5515001	5520000	-2.72691	2	-0.201503	-0.446436	-0.330128	-0.275006	0.147751	-0.318594	-0.615379
chr1	5545001	5550000	-2.01842	3	0.222167	0.223351	0.231433	-0.228772	-0.215451	-0.171572	-0.534878
chr1	5550001	5555000	-1.92094	3	-0.271938	-0.193401	-0.333372	-0.261446	-0.00242339	-0.340261	-0.564691
chr1	5565001	5570000	-1.62588	4	-0.0416473	-0.061759	-0.214841	-0.200953	0.0376737	-0.364623	-0.633998
chr1	5575001	5580000	-1.41798	4	-0.638892	-0.495695	-0.709718	-0.103463	-0.00668027	-0.49886	-0.679914
chr1	5580001	5585000	-1.31751	4	-0.117256	-0.139501	-0.194647	-0.133718	0.0922055	-0.30398	-0.53657
chr1	5585001	5590000	-1.2224	4	-0.0719158	-0.0572606	-0.0947109	-0.292331	-0.0380461	-0.351766	-0.599657
chr1	5590001	5595000	-1.13494	4	-0.205412	-0.130418	-0.324061	-0.187964	0.0925194	-0.414574	-0.713092
chr1	5595001	5600000	-1.05609	4	-0.592547	-0.65429	-0.869451	-0.180907	0.103737	-0.488171	-0.713847
chr1	5600001	5605000	-0.983658	4	-0.33865	-0.381105	-0.499945	-0.24346	0.0420184	-0.44897	-0.757199
chr1	5605001	5610000	-0.915141	4	0.122219	0.208713	0.193694	-0.376588	-0.0163122	-0.286755	-0.675128
chr1	5615001	5620000	-0.779888	4	-0.633794	-0.460409	-0.505109	-0.228024	0.103561	-0.399203	-0.585936
chr1	5620001	5625000	-0.718871	5	-0.189767	-0.275886	-0.224447	-0.168593	0.0173635	-0.415379	-0.576798
chr1	5625001	5630000	-0.670217	5	-0.106115	-0.0846903	-0.124652	-0.331909	-0.0478828	-0.133521	-0.543346
chr1	5630001	5635000	-0.626947	5	-0.0283228	-0.0632297	-0.0818052	-0.0104482	0.0242188	-0.241856	-0.693747
chr1	5635001	5640000	-0.582082	5	-0.300622	-0.400897	-0.245778	-0.0776776	0.144264	-0.418103	-0.625536
chr1	5640001	5645000	-0.528642	5	-0.292559	-0.405148	-0.40487	-0.20966	0.156656	-0.314718	-0.650011
chr1	5645001	5650000	-0.471601	5	-0.679248	-0.642939	-0.700539	-0.0738747	0.126999	-0.326999	-0.679652
chr1	5650001	5655000	-0.41806	5	-0.352047	-0.480054	-0.573096	-0.0667657	0.053335	-0.312776	-0.577729
chr1	5655001	5660000	-0.364227	5	-0.289734	-0.355275	-0.527604	-0.224253	0.0770764	-0.249438	-0.549925
chr1	5660001	5665000	-0.306314	5	-0.55944	-0.719717	-0.759215	-0.0833376	0.15474	-0.40114	-0.529231
chr1	5665001	5670000	-0.240077	5	-0.53528	-0.686424	-0.782896	-0.164973	0.131334	-0.555657	-0.66563
chr1	5670001	5675000	-0.166801	5	-0.375838	-0.480677	-0.447968	-0.324885	0.06011	-0.442372	-0.565499
chr1	5675001	5680000	-0.0909901	5	-0.309926	-0.281908	-0.300727	-0.292657	0.0326532	-0.35079	-0.502204
chr1	5680001	5685000	-0.0171468	5	-0.432118	-0.590115	-0.624605	-0.140951	0.239022	-0.433981	-0.427534
chr1	5685001	5690000	0.0502257	5	-0.441139	-0.68236	-0.530672	-0.128192	0.202212	-0.438602	-0.642522
chr1	5690001	5695000	0.116794	6	-0.406439	-0.493263	-0.481752	-0.137821	0.202647	-0.354064	-0.560386
chr1	5695001	5700000	0.187663	6	-0.2843	-0.438797	-0.360208	-0.139787	0.0610235	-0.332301	-0.491034
chr1	5700001	5705000	0.257488	6	-0.335406	-0.53159	-0.617031	-0.118977	-0.0363795	-0.512804	-0.637539
chr1	5705001	5710000	0.320923	6	-0.508099	-0.667138	-0.687836	-0.107362	0.152413	-0.506907	-0.413645
chr1	5710001	5715000	0.381422	6	-0.54322	-0.650162	-0.778449	-0.118995	0.128162	-0.441909	-0.510494
chr1	5715001	5720000	0.444178	6	-0.610405	-0.782584	-0.703847	-0.0566275	0.149466	-0.445832	-0.458705
chr1	5720001	5725000	0.50646	6	-0.513443	-0.539451	-0.650425	-0.178193	0.143173	-0.413783	-0.429985
chr1	5725001	5730000	0.565539	6	-0.446402	-0.500995	-0.652236	0.0622304	0.131093	-0.444905	-0.458067
chr1	5730001	5735000	0.618683	6	-0.360391	-0.479918	-0.447045	0.0199431	0.169632	-0.452783	-0.493799
chr1	5735001	5740000	0.659331	6	-0.272695	-0.3641	-0.497173	-0.0818863	0.24369	-0.319095	-0.596352
chr1	5740001	5745000	0.689002	6	-0.445016	-0.644061	-0.745098	-0.015287	0.196179	-0.338571	-0.566498
chr1	5745001	5750000	0.71709	6	-0.692749	-0.699532	-1.12147	-0.083271	0.140305	-0.478649	-0.572205
chr1	5750001	5755000	0.752986	6	-0.623876	-0.622476	-0.884243	0.0257786	0.147671	-0.486536	-0.518155
chr1	5755001	5760000	0.787838	6	-0.488593	-0.541182	-0.576899	-0.0367493	0.277209	-0.486982	-0.507199
chr1	5760001	5765000	0.811785	6	-0.185872	-0.1703	-0.241953	-0.191387	0.201921	-0.35351	-0.539261
chr1	5765001	5770000	0.832705	7	-0.59907	-0.560464	-0.696387	-0.181185	0.180929	-0.482973	-0.538479
chr1	5770001	5775000	0.858477	7	-0.497016	-0.585924	-0.547479	-0.0808257	0.184035	-0.463867	-0.435246
chr1	5775001	5780000	0.896979	7	-0.576553	-0.608296	-0.674341	-0.0733281	0.0706419	-0.421197	-0.366733
chr1	5780001	5785000	0.940857	7	-0.382994	-0.516209	-0.372276	-0.0904606	0.0182104	-0.471324	-0.381369
chr1	5785001	5790000	0.981606	7	-0.0904909	-0.304002	-0.341041	-0.180759	0.103333	-0.293039	-0.342694
chr1	5790001	5795000	1.02537	7	-0.282339	-0.273545	-0.574377	-0.112404	0.0262751	-0.321961	-0.194323
chr1	5795001	5800000	1.0783	7	-0.400734	-0.629161	-0.698006	-0.0487168	0.137335	-0.275975	-0.353309
chr1	5800001	5805000	1.14408	7	-0.392245	-0.315658	-0.487916	-0.0948413	0.0946976	-0.352283	-0.36369
chr1	5805001	5810000	1.21913	7	-0.16655	-0.0614022	-0.344392	-0.160128	0.198062	-0.246025	-0.3371
chr1	5810001	5815000	1.2987	7	-0.483301	-0.49369	-0.664615	0.079571	0.186755	-0.401623	-0.356623
chr1	5815001	5820000	1.37805	7	-0.444052	-0.483687	-0.601385	-0.0309537	0.172943	-0.38719	-0.422504
chr1	5820001	5825000	1.45246	7	-0.511454	-0.527675	-0.69692	-0.0603136	0.130419	-0.292281	-0.247392
chr1	5825001	5830000	1.52984	7	-0.443433	-0.636201	-0.783084	-0.0399174	0.15753	-0.257058	-0.206105
chr1	5830001	5835000	1.61619	8	-0.70638	-0.911285	-0.987693	0.0686441	0.158147	-0.490014	-0.282421
chr1	5835001	5840000	1.70382	8	-0.664711	-0.68189	-0.839783	0.0465343	0.15728	-0.299894	-0.29543
chr1	5840001	5845000	1.78508	8	-0.607684	-0.71403	-0.703858	0.0801465	0.209585	-0.266963	-0.259566
chr1	5845001	5850000	1.86152	8	-0.560233	-0.795768	-0.88723	-0.019419	0.192894	-0.376047	-0.163259
chr1	5850001	5855000	1.93963	8	-0.477634	-0.672724	-0.750679	0.055964	0.23295	-0.363944	-0.165205
chr1	5855001	5860000	2.01914	8	-0.456222	-0.782735	-0.656323	0.0859593	0.231878	-0.313457	-0.216877
chr1	5860001	5865000	2.09978	8	-0.599948	-0.895409	-0.873473	-0.00743744	0.17576	-0.341534	-0.187634
chr1	5865001	5870000	2.18128	8	-0.392421	-0.336913	-0.442969	0.0170556	0.106007	-0.129037	-0.253732
chr1	5870001	5875000	2.26336	8	-0.367187	-0.332628	-0.430803	-0.0404445	0.232307	-0.15539	-0.144431
chr1	5875001	5880000	2.34575	8	-0.593681	-0.645707	-0.863053	0.0317294	0.293473	-0.316546	-0.262764
chr1	5880001	5885000	2.42818	8	-0.577889	-0.721964	-0.855167	0.0697557	0.264949	-0.345296	-0.245422
chr1	5885001	5890000	2.51344	8	-0.573484	-0.702	-0.864926	-0.0401127	-0.064651	-0.378873	-0.257801
chr1	5890001	5895000	2.60236	8	-0.525304	-0.684176	-0.496399	-0.0387003	-0.0902582	-0.0956866	-0.266929
chr1	5895001	5900000	2.69168	8	-0.472508	-0.52572	-0.427647	-0.24994	-0.0371833	-0.127412	-0.0735185
chr1	5900001	5905000	2.77815	9	-0.300791	-0.252208	-0.412521	-0.322236	-0.0491399	-0.326714	-0.104326
chr1	5905001	5910000	2.85851	9	-0.538585	-0.638828	-0.641096	-0.0728953	0.142843	-0.333264	-0.138194
chr1	5910001	5915000	2.93541	9	-0.636089	-0.729492	-0.791918	0.0379785	0.0605576	-0.152547	-0.150647
chr1	5915001	5920000	3.01275	9	-0.386837	-0.380202	-0.258269	-0.102845	0.0357953	-0.136989	0.0960525
chr1	5920001	5925000	3.08923	9	-0.209082	-0.194042	-0.188843	-0.212449	-0.105522	-0.112564	0.028838
chr1	5930001	5935000	3.23433	9	-0.180221	-0.0827575	-0.17105	-0.200937	-0.0986939	0.0181591	0.000650388
chr1	5935001	5940000	3.30532	9	-0.454915	-0.43913	-0.308524	-0.230187	-0.0472513	-0.128933	-0.00673344
chr1	5940001	5945000	3.37913	9	-0.362718	-0.236938	-0.343236	-0.142419	-0.00121375	-0.0654048	-0.0256709
chr1	5945001	5950000	3.45287	9	-0.403064	-0.447814	-0.376131	-0.0916697	0.0950281	-0.132845	-0.0591704
chr1	5950001	5955000	3.52363	9	-0.415835	-0.482428	-0.371456	-0.121466	0.0772353	-0.182026	-0.0248199
chr1	5955001	5960000	3.58851	9	-0.483299	-0.317289	-0.442383	-0.277755	-0.00135747	0.0211845	0.0654373
chr1	5960001	5965000	3.655	9	-0.473575	-0.645273	-0.763343	-0.0167294	-0.0766402	0.0201637	0.0756119
chr1	5965001	5970000	3.72668	9	-0.556585	-0.69135	-0.707176	-0.159882	0.0317972	-0.120869	-0.0114
chr1	5970001	5975000	3.79476	9	-0.600876	-0.623533	-0.584932	-0.209137	-0.179681	0.0177364	0.0979663
chr1	5975001	5980000	3.85046	10	-0.654602	-0.680492	-0.664132	-0.116096	-0.0592553	-0.0959008	-0.089813
chr1	5980001	5985000	3.89176	10	-0.184452	-0.198719	-0.283895	-0.244774	-0.236125	0.0425513	0.0479634
chr1	5985001	5990000	3.92425	10	-0.356603	-0.40082	-0.411899	-0.267838	-0.0716326	0.144895	0.0671664
chr1	5990001	5995000	3.95057	10	-0.685837	-0.795817	-0.802369	-0.164023	-0.0753749	-0.0222658	-0.185397
chr1	6000001	6005000	3.99524	10	-0.851988	-0.594518	-0.964171	-0.216022	-0.00553522	-0.211425	-0.0346812
chr1	6005001	6010000	4.01886	10	-0.765676	-0.878619	-0.97852	-0.273505	-0.13411	-0.20295	0.0211419
chr1	6010001	6015000	4.03932	10	-0.71197	-0.745864	-0.974013	-0.258253	-0.0130088	-0.100131	-0.100105
chr1	6015001	6020000	4.05308	10	-0.577096	-0.594353	-0.659049	-0.223913	-0.154845	-0.114699	0.0773068
chr1	6020001	6025000	4.06483	10	-0.318492	-0.377205	-0.462555	-0.216497	-0.149859	0.119058	0.0279779
chr1	6025001	6030000	4.07925	10	-0.530239	-0.573074	-0.708875	-0.213212	-0.185032	-0.0412919	-0.0655053
chr1	6030001	6035000	4.09507	10	-0.484248	-0.326054	-0.512828	-0.266206	-0.185929	0.0889004	-0.0810118
chr1	6035001	6040000	4.10822	10	-0.571956	-0.825575	-0.791464	-0.135418	-0.164282	-0.0343523	0.0137272
chr1	6045001	6050000	4.12855	10	-0.698714	-0.965246	-0.908657	-0.0889508	-0.101062	0.03534	0.199072
chr1	6050001	6055000	4.13674	10	-0.588902	-0.726437	-0.781423	-0.212883	-0.179603	0.114228	0.169227
chr1	6055001	6060000	4.1443	10	-0.756622	-0.835247	-0.816007	-0.196694	-0.271908	0.113924	0.214962
chr1	6060001	6065000	4.15064	10	-0.450662	-0.620497	-0.713583	-0.183047	-0.337249	0.14589	0.125829
chr1	6070001	6075000	4.15724	10	-0.714809	-0.787843	-0.720938	-0.221929	-0.285947	0.125999	0.136392
chr1	6075001	6080000	4.1577	10	-0.581537	-0.732157	-0.727124	-0.291628	-0.204961	0.201849	0.178387
chr1	6080001	6085000	4.1564	10	-0.673246	-0.749909	-0.808896	-0.203123	-0.261849	0.131013	0.139686
chr1	6090001	6095000	4.13742	10	-0.746369	-0.841648	-0.78693	-0.109312	-0.346949	0.265121	0.170139
chr1	6105001	6110000	4.07622	10	-0.715231	-0.764991	-1.05552	-0.125117	-0.305915	0.178904	-0.0199578
chr1	6115001	6120000	4.03457	10	-0.145903	-0.0702103	-0.0850507	-0.393642	-0.347463	0.342492	0.20716
chr1	6120001	6125000	4.01888	10	-0.529009	-0.587182	-0.610005	-0.22594	-0.164289	0.284067	0.221505
chr1	6125001	6130000	4.00901	10	-0.858826	-0.955661	-0.976877	-0.153861	-0.28583	0.176703	0.0477442
chr1	6130001	6135000	4.00137	10	-0.75804	-0.770835	-0.824001	-0.19565	-0.299762	0.219207	0.180719
chr1	6140001	6145000	3.9827	10	-0.590338	-0.565365	-0.883904	-0.0538098	-0.24632	0.299863	0.109767
chr1	6145001	6150000	3.97453	10	-0.677976	-0.773969	-0.90087	-0.0850557	-0.209589	0.274051	0.0628691
chr1	6150001	6155000	3.96904	10	-0.752539	-0.860778	-1.0896	-0.307879	-0.24033	0.229023	0.113023
chr1	6160001	6165000	3.9616	10	-0.699352	-0.812968	-1.06528	-0.231309	-0.279627	0.125676	0.219987
chr1	6170001	6175000	3.95422	10	-0.706416	-0.74773	-0.98707	-0.0366101	-0.312912	0.368684	0.129108
chr1	6180001	6185000	3.94733	10	-0.596806	-0.644576	-0.672223	-0.116495	-0.349715	0.288966	0.0450315
chr1	6185001	6190000	3.94419	10	-0.541961	-0.519746	-0.560835	-0.234658	-0.287546	0.316043	0.142463
chr1	6190001	6195000	3.94131	10	-0.408327	-0.485799	-0.669512	-0.126496	-0.341881	0.36524	0.185191
chr1	6195001	6200000	3.93811	10	-0.32506	-0.422272	-0.642336	-0.264052	-0.398382	0.314762	0.12257
chr1	6210001	6215000	3.92634	10	-0.615518	-0.746867	-0.870819	-0.0731958	-0.323335	0.313897	0.305589
chr1	6220001	6225000	3.92128	10	-0.469231	-0.496084	-0.582234	-0.156335	-0.234061	0.461976	0.136652
chr1	6225001	6230000	3.92097	10	-0.440672	-0.524117	-0.495382	-0.234731	-0.391841	0.420819	0.282848
chr1	6230001	6235000	3.92375	10	-0.416632	-0.605352	-0.60811	-0.243971	-0.263339	0.270971	0.124812
chr1	6250001	6255000	3.96516	10	-0.669799	-0.7666	-0.98407	0.0224658	-0.218082	0.249445	0.16327
chr1	6265001	6270000	4.00755	10	-0.634202	-0.846246	-0.937667	0.101399	-0.109579	0.550781	0.49643
chr1	6285001	6290000	4.04168	10	-0.61847	-0.717634	-0.77215	0.0640379	-0.0888821	0.352543	0.506229
chr1	6290001	6295000	4.04133	10	-0.5517	-0.560002	-0.620608	0.119907	-0.153265	0.320062	0.304389
chr1	6310001	6315000	3.961	10	-0.643478	-0.682094	-0.734581	0.117402	-0.109574	0.446614	0.304393
chr1	6315001	6320000	3.93631	10	-0.449283	-0.683485	-0.611285	0.0339295	-0.157312	0.438059	0.330668
chr1	6320001	6325000	3.91799	10	-0.445586	-0.70276	-0.67609	0.120483	-0.20128	0.383069	0.400178
chr1	6325001	6330000	3.91014	10	-0.51693	-0.694359	-0.687592	0.260401	-0.0283901	0.379632	0.425124
chr1	6330001	6335000	3.90759	10	-0.57772	-0.724709	-0.731077	0.243206	-0.152226	0.429572	0.42508
chr1	6335001	6340000	3.90305	10	-0.679815	-0.669531	-0.84372	0.0751633	-0.150992	0.446263	0.383846
chr1	6340001	6345000	3.89739	10	-0.800297	-0.595363	-0.875751	0.0709893	-0.228113	0.463573	0.330207
chr1	6350001	6355000	3.88626	10	-0.588129	-0.679001	-0.706714	0.0901646	-0.214175	0.211572	0.334155
chr1	6355001	6360000	3.88255	10	-0.728614	-0.824777	-0.782689	0.144764	-0.190963	0.340778	0.366592
chr1	6360001	6365000	3.88124	10	-0.517302	-0.466633	-0.675222	-0.0337119	-0.350153	0.333253	0.332765
chr1	6365001	6370000	3.88323	10	-0.578473	-0.538627	-0.707956	0.0826194	-0.357335	0.32955	0.138975
chr1	6370001	6375000	3.88938	10	-0.4909	-0.49915	-0.451653	-0.0538476	-0.343393	0.318789	0.178449
chr1	6375001	6380000	3.90336	10	-0.542277	-0.297464	-0.375765	-0.0301465	-0.287539	0.247857	0.278057
chr1	6385001	6390000	3.95222	10	-0.5632	-0.653873	-0.688681	-0.00153774	-0.294684	0.34947	0.0527654
chr1	6390001	6395000	3.97921	10	-0.611107	-0.7753	-0.756792	-0.0655071	-0.389633	0.149267	-0.0508622
chr1	6395001	6400000	4.00266	10	-0.439596	-0.516388	-0.601982	-0.0886596	-0.357942	0.183593	0.0760411
chr1	6400001	6405000	4.01862	10	-0.338274	-0.324113	-0.510209	-0.102767	-0.513286	0.274578	0.0222852
chr1	6405001	6410000	4.03705	10	-0.354473	-0.39181	-0.482309	-0.0792065	-0.45777	0.279286	0.0895678
chr1	6410001	6415000	4.06578	10	-0.379992	-0.543521	-0.593988	-0.0421091	-0.250965	0.186207	0.235422
chr1	6420001	6425000	4.12585	10	-0.72977	-0.862348	-0.944986	-0.043792	-0.385595	0.124732	-0.101039
chr1	6425001	6430000	4.14302	10	-0.818563	-0.970953	-0.965039	0.112509	-0.230807	0.217828	0.0137725
chr1	6430001	6435000	4.15276	10	-0.575977	-0.805956	-0.91036	0.109922	-0.233508	0.450168	0.238586
chr1	6440001	6445000	4.17371	10	-0.595316	-0.676417	-0.851736	0.116115	-0.300996	0.380252	0.0867784
chr1	6450001	6455000	4.1944	10	-0.704351	-0.892538	-1.04198	0.163176	-0.285146	0.474132	0.229009
chr1	6480001	6485000	4.22837	10	-0.721862	-0.858317	-0.77395	0.0799043	-0.318657	0.520126	0.241411
chr1	6485001	6490000	4.22646	10	-0.944159	-0.932247	-1.02455	-0.0448277	-0.420932	0.403584	0.189595
chr1	6490001	6495000	4.20826	10	-0.714327	-0.750082	-0.921249	0.0618411	-0.326272	0.347052	0.229865
chr1	6495001	6500000	4.17217	10	-0.765937	-0.89088	-1.03786	0.132153	-0.410182	0.265339	0.201519
chr1	6500001	6505000	4.13578	10	-0.691602	-0.940251	-1.04342	-0.0403036	-0.528611	0.159388	0.151788
chr1	6505001	6510000	4.1167	10	-0.694056	-0.956928	-1.01951	0.0477693	-0.455365	0.463949	0.0678985
chr1	6515001	6520000	4.08527	10	-0.298925	-0.44316	-0.47036	-0.0185735	-0.438027	0.37825	0.220073
chr1	6525001	6530000	4.03189	10	-0.489465	-0.544581	-0.557091	0.122139	-0.307096	0.481195	0.396084
chr1	6530001	6535000	4.00762	10	-0.410182	-0.394067	-0.523713	0.0385267	-0.295922	0.594392	0.541901
chr1	6535001	6540000	3.99064	10	-0.050521	-0.263755	-0.521099	-0.0462761	-0.369203	0.614662	0.473632
chr1	6540001	6545000	3.98519	10	-0.358765	-0.384167	-0.548746	0.046827	-0.391521	0.735868	0.464863
chr1	6545001	6550000	3.98816	10	-0.459918	-0.307447	-0.475693	0.0568525	-0.324614	0.678983	0.443142
chr1	6560001	6565000	4.00903	10	-0.610613	-0.721933	-0.642575	-0.0927821	-0.366271	0.540153	0.297193
chr1	6570001	6575000	4.02977	10	-0.476131	-0.760149	-0.918022	-0.0313087	-0.314112	0.333632	0.270022
chr1	6575001	6580000	4.04123	10	-0.509851	-0.783292	-0.863087	0.066876	-0.255413	0.434944	0.359289
chr1	6580001	6585000	4.06605	10	-0.700983	-0.677703	-0.830448	0.0858741	-0.257952	0.517172	0.270619
chr1	6585001	6590000	4.11249	10	-0.682426	-0.781121	-0.942134	0.178521	-0.1677	0.551524	0.40156
chr1	6600001	6605000	4.31122	10	-0.544583	-0.78601	-0.694307	0.212622	-0.353242	0.14384	0.0437855
chr1	6610001	6615000	4.42293	10	-0.489035	-0.561707	-0.786245	0.0267065	-0.345617	0.276921	0.029018
chr1	6615001	6620000	4.45145	10	-0.463215	-0.653223	-0.759862	0.0898291	-0.2617	0.283121	0.211529
chr1	6625001	6630000	4.48036	10	-0.741425	-0.753259	-0.89205	0.214548	-0.252296	0.310117	0.286102
chr1	6645001	6650000	4.51514	10	-0.63207	-0.686026	-0.850012	0.183875	-0.120327	0.260795	0.355188
chr1	6650001	6655000	4.51765	10	-0.456618	-0.620449	-0.645502	0.07044	-0.117563	0.255401	0.474666
chr1	6655001	6660000	4.51721	10	-0.362755	-0.467819	-0.487633	0.0369858	-0.0808554	0.357933	0.474452
chr1	6660001	6665000	4.50481	10	-0.372255	-0.437797	-0.473298	0.0503351	-0.0270585	0.398219	0.39045
chr1	6665001	6670000	4.47645	10	-0.418607	-0.369081	-0.701049	0.0613829	-0.112879	0.505094	0.511666
chr1	6670001	6675000	4.4394	10	-0.399997	-0.281355	-0.342678	0.040945	-0.0937161	0.428094	0.530206
chr1	6680001	6685000	4.36839	10	-0.225608	-0.13466	-0.179898	0.263602	0.0853302	0.254564	0.578222
chr1	6685001	6690000	4.34898	10	0.0147821	-0.0209777	-0.211518	0.136504	-0.0557653	0.358671	0.539039
chr1	6690001	6695000	4.33331	10	-0.406985	-0.30089	-0.463553	0.17126	-0.0733423	0.282518	0.383956
chr1	6700001	6705000	4.28401	10	-0.352115	-0.469515	-0.465119	0.317932	0.0257223	0.375437	0.376869
chr1	6705001	6710000	4.25942	10	-0.25769	-0.226891	-0.422687	0.380762	-0.045053	0.628152	0.606333
chr1	6710001	6715000	4.24091	10	-0.31926	-0.30131	-0.429435	0.392632	0.0445067	0.602991	0.510955
chr1	6720001	6725000	4.21284	10	-0.463821	-0.42068	-0.541392	0.309625	-0.0449287	0.547566	0.290634
chr1	6725001	6730000	4.199	10	-0.286095	-0.235349	-0.42298	0.39598	-0.0721899	0.497236	0.323182
chr1	6730001	6735000	4.18554	10	-0.148622	-0.195472	-0.432097	0.527377	-0.0403669	0.465521	0.354576
chr1	6735001	6740000	4.17265	10	-0.359041	-0.501296	-0.554362	0.536311	0.0428267	0.455472	0.3933
chr1	6740001	6745000	4.16052	10	-0.242388	-0.394248	-0.525858	0.733474	0.128107	0.49047	0.335247
chr1	6750001	6755000	4.15854	10	-0.208485	-0.193968	-0.349317	0.438788	-0.0694516	0.455165	0.474397
chr1	6755001	6760000	4.166	10	-0.333912	-0.432519	-0.462692	0.448728	-0.0358631	0.402584	0.359806
chr1	6760001	6765000	4.17236	10	-0.463368	-0.40665	-0.656463	0.418381	0.090455	0.300117	0.375375
chr1	6765001	6770000	4.17255	10	-0.257816	-0.224288	-0.394089	0.419042	0.0800703	0.370314	0.381224
chr1	6770001	6775000	4.18202	10	-0.187069	-0.391244	-0.406015	0.413342	0.106841	0.297961	0.464332
chr1	6775001	6780000	4.21214	10	-0.162979	-0.323685	-0.180852	0.418373	0.0848647	0.373212	0.448117
chr1	6785001	6790000	4.28962	10	-0.366268	-0.395974	-0.421392	0.289476	0.0835694	0.260417	0.208
chr1	6790001	6795000	4.31467	10	-0.0167654	0.0591201	0.0987263	0.0824823	-0.0477733	0.306062	0.2617
chr1	6795001	6800000	4.3157	10	-0.161121	-0.186951	-0.134348	0.216192	-0.0860673	0.302275	0.391404
chr1	6805001	6810000	4.28068	10	-0.0944836	-0.17094	-0.236357	0.105335	0.0951886	0.183649	0.340306
chr1	6810001	6815000	4.25634	10	-0.13739	-0.163981	-0.237582	0.0649314	0.0708634	0.141724	0.373971
chr1	6815001	6820000	4.22511	10	-0.0868826	-0.259277	-0.0768202	0.00235631	0.0984479	0.293645	0.393776
chr1	6820001	6825000	4.18525	10	0.210623	0.234298	0.368213	-0.224839	0.0209676	0.208424	0.4828
chr1	6830001	6835000	4.07252	10	-0.0730282	0.0113194	-0.0917796	-0.176311	-0.141538	0.110456	0.163205
chr1	6835001	6840000	4.00169	10	-0.314542	-0.212604	-0.31298	-0.18357	0.0780915	0.110674	0.0301813
chr1	6840001	6845000	3.92381	10	-0.383498	-0.324463	-0.399072	-0.240295	-0.0534065	0.00101377	0.134822
chr1	6845001	6850000	3.84082	10	-0.219637	-0.243402	-0.123233	-0.305041	-0.205155	-0.127852	0.0314784
chr1	6850001	6855000	3.75469	9	-0.00865189	0.0378202	0.0494296	-0.261424	0.086824	0.0437338	0.0340026
chr1	6860001	6865000	3.58074	9	-0.164788	-0.223564	-0.154083	-0.414565	-0.0122377	-0.0525566	-0.0863141
chr1	6865001	6870000	3.49683	9	-0.00479609	-0.159307	-0.119544	-0.272722	-0.0990545	-0.0229228	0.0846941
chr1	6870001	6875000	3.41755	9	-0.100747	-0.108373	-0.150958	-0.386311	-0.102764	-0.00108073	0.184371
chr1	6875001	6880000	3.33408	9	-0.341048	-0.330352	-0.396621	-0.106497	-0.000504199	-0.0858156	0.0966236
chr1	6880001	6885000	3.24029	9	-0.287124	-0.25076	-0.37147	-0.230932	0.0942811	-0.0920287	-0.0975161
chr1	6885001	6890000	3.14218	9	-0.03399	-0.113699	-0.174312	-0.448167	-0.0272054	-0.0346102	0.0982798
chr1	6890001	6895000	3.04578	9	-0.217712	-0.160589	-0.273403	-0.451083	-0.0999255	-0.0989572	0.0105581
chr1	6895001	6900000	2.95709	9	-0.334701	-0.227436	-0.324617	-0.479178	-0.058869	0.00954388	0.080891
chr1	6900001	6905000	2.86237	9	-0.174334	-0.0556011	-0.233138	-0.48388	0.0169206	0.0689664	0.0710617
chr1	6905001	6910000	2.75351	9	-0.517769	-0.515049	-0.55781	-0.373458	0.0508878	-0.155984	-0.0827006
chr1	6910001	6915000	2.64497	8	-0.477759	-0.470813	-0.603033	-0.297985	0.0771212	-0.198595	0.00123945
chr1	6915001	6920000	2.55119	8	-0.469361	-0.619491	-0.664331	-0.119625	0.0522317	-0.242251	-0.119888
chr1	6920001	6925000	2.4725	8	-0.517098	-0.761692	-0.647813	-0.197256	0.00312347	-0.144771	-0.0195565
chr1	6925001	6930000	2.39883	8	-0.49468	-0.634234	-0.708855	-0.30455	-0.214246	-0.058804	-0.233072
chr1	6930001	6935000	2.32909	8	-0.270067	-0.355015	-0.360237	-0.378799	-0.128777	-0.28469	-0.133157
chr1	6935001	6940000	2.26218	8	-0.585938	-0.523601	-0.819122	-0.161709	0.102008	-0.30338	-0.314106
chr1	6940001	6945000	2.19703	8	-0.418527	-0.344454	-0.404018	-0.192329	0.0164103	-0.217025	-0.255672
chr1	6945001	6950000	2.14191	8	-0.272307	-0.215583	-0.274351	-0.360748	0.0265424	-0.161042	-0.14259
chr1	6950001	6955000	2.09923	8	-0.44173	-0.571728	-0.656633	-0.177033	-0.0500964	-0.215768	-0.365405
chr1	6955001	6960000	2.05903	8	-0.456214	-0.571588	-0.62029	-0.057676	-0.0217425	-0.221749	-0.199077
chr1	6960001	6965000	2.01133	8	-0.582462	-0.644507	-0.799553	-0.165822	-0.00753518	-0.250958	-0.520432
chr1	6965001	6970000	1.9548	8	-0.501323	-0.491081	-0.593425	-0.247061	0.0720151	-0.231777	-0.397169
chr1	6970001	6975000	1.89604	8	-0.418132	-0.591245	-0.583846	-0.420138	0.0160857	-0.212138	-0.197468
chr1	6975001	6980000	1.83699	8	-0.376452	-0.475007	-0.507554	-0.325617	0.0663999	-0.0758908	-0.0508581
chr1	6980001	6985000	1.77959	8	-0.407152	-0.280927	-0.429454	-0.17044	0.0106805	-0.218449	-0.173783
chr1	6985001	6990000	1.72577	8	-0.545025	-0.393575	-0.504435	-0.0619488	-0.102397	-0.18113	-0.318635
chr1	6990001	6995000	1.67428	8	-0.110259	0.0418692	-0.0335129	-0.26956	-0.220722	-0.00209554	-0.267595
chr1	6995001	7000000	1.62332	8	-0.179885	-0.282953	-0.396799	-0.194571	-0.0546951	-0.0884552	-0.342519
chr1	7000001	7005000	1.574	7	-0.317452	-0.250093	-0.413821	-0.195442	0.0750107	-0.233038	-0.182432
chr1	7005001	7010000	1.52743	7	-0.617001	-0.531918	-0.600819	0.0193959	0.101654	-0.149781	-0.261661
chr1	7010001	7015000	1.48259	7	-0.766129	-0.848117	-0.777807	0.0131091	0.121006	-0.0605441	-0.419139
chr1	7015001	7020000	1.43852	7	-0.369814	-0.468113	-0.609137	-0.100212	0.126719	-0.0990314	-0.263329
chr1	7020001	7025000	1.3964	7	-0.355489	-0.44347	-0.517511	-0.141358	0.154848	-0.0390048	-0.229619
chr1	7025001	7030000	1.35743	7	-0.329561	-0.33271	-0.422126	-0.174365	-0.0851648	0.0120176	-0.309529
chr1	7030001	7035000	1.32279	7	0.12457	-0.113121	-0.0622452	-0.228777	-0.0498662	0.00358394	-0.216676
chr1	7035001	7040000	1.28932	7	-0.0751425	-0.14959	-0.104176	-0.125616	-0.0823144	-0.0567542	-0.133478
chr1	7040001	7045000	1.25528	7	-0.446963	-0.492534	-0.470413	0.044142	0.190103	-0.150146	-0.156489
chr1	7045001	7050000	1.22398	7	-0.536139	-0.535188	-0.663821	-0.0150115	0.0564192	-0.176748	-0.311075
chr1	7050001	7055000	1.19875	7	-0.607878	-0.793279	-0.855113	-0.00702671	0.141443	-0.222321	-0.357619
chr1	7055001	7060000	1.18114	7	-0.495317	-0.584172	-0.61477	-0.0917335	0.141638	-0.223115	-0.24939
chr1	7060001	7065000	1.169	7	-0.409765	-0.629273	-0.747274	0.0808429	0.150317	-0.209466	-0.351835
chr1	7065001	7070000	1.16004	7	-0.491074	-0.489795	-0.674454	-0.0330504	0.23196	-0.0922697	-0.21872
chr1	7070001	7075000	1.15198	7	-0.463884	-0.369008	-0.469091	-0.137392	0.197658	0.00409414	-0.378019
chr1	7075001	7080000	1.14254	7	-0.193435	-0.295455	-0.202239	-0.38116	0.0923005	-0.0102698	-0.215104
chr1	7080001	7085000	1.13841	7	-0.216844	-0.313498	-0.232742	-0.0657103	0.218027	-0.0805311	-0.23764
chr1	7085001	7090000	1.14289	7	-0.369058	-0.504575	-0.569751	-0.19752	0.174903	-0.134539	-0.234496
chr1	7090001	7095000	1.14867	7	-0.451147	-0.470328	-0.477188	-0.103449	0.0625776	-0.0915455	-0.122422
chr1	7095001	7100000	1.1484	7	-0.602088	-0.582188	-0.702536	-0.195436	0.227649	0.04239	-0.401842
chr1	7100001	7105000	1.14534	7	-0.102994	-0.0479666	-0.105533	-0.108083	0.201689	-0.0789388	-0.420417
chr1	7105001	7110000	1.14618	7	-0.265345	-0.433815	-0.495413	-0.103034	0.21283	-0.145091	-0.208096
chr1	7110001	7115000	1.14874	7	-0.444878	-0.516404	-0.659642	-0.149847	0.185433	-0.162247	-0.289036
chr1	7115001	7120000	1.15084	7	-0.369701	-0.538485	-0.508959	-0.111111	0.124694	-0.0138353	-0.379444
chr1	7120001	7125000	1.1503	7	-0.516907	-0.581956	-0.679142	0.138463	0.231517	-0.116458	-0.333846
chr1	7125001	7130000	1.14646	7	-0.27204	-0.407505	-0.560195	0.0680266	0.115278	-0.141681	-0.343643
chr1	7130001	7135000	1.14115	7	-0.039507	-0.0647501	-0.0624372	-0.0180196	0.0946152	-0.0312745	-0.29158
chr1	7135001	7140000	1.13591	7	-0.196186	-0.215651	-0.275658	-0.132418	0.127321	-0.0555732	-0.0921895
chr1	7140001	7145000	1.13229	7	-0.246493	-0.300391	-0.479377	-0.0174586	0.161672	-0.0808444	-0.253288
chr1	7145001	7150000	1.1272	7	-0.387777	-0.228392	-0.358338	0.128424	0.156422	-0.192637	-0.457784
chr1	7150001	7155000	1.11831	7	-0.593631	-0.560089	-0.511243	0.0102285	0.113672	-0.052855	-0.284979
chr1	7155001	7160000	1.10823	7	-0.557442	-0.591479	-0.522562	-0.0129822	0.0781848	-0.140412	-0.262495
chr1	7160001	7165000	1.09962	7	-0.23257	-0.290579	-0.414198	-0.155674	-0.0247357	0.0693352	-0.393577
chr1	7165001	7170000	1.0951	7	-0.0978703	0.103893	0.0704211	0.0299334	0.0128465	0.0627077	-0.305849
chr1	7170001	7175000	1.09606	7	-0.305611	-0.169662	-0.34125	0.114441	0.191007	-0.0720061	-0.31364
chr1	7175001	7180000	1.10025	7	-0.253263	-0.314458	-0.533526	0.0275113	0.0723454	-0.0562737	-0.464972
chr1	7180001	7185000	1.10485	7	0.111748	0.117035	0.0544811	-0.118674	0.0598127	0.0488376	-0.173419
chr1	7185001	7190000	1.10703	7	0.0808168	0.0274542	0.0165968	-0.116496	0.167053	0.14096	-0.217484
chr1	7190001	7195000	1.10631	7	-0.17443	-0.182818	-0.109517	-0.141551	0.0606209	0.0503721	-0.142915
chr1	7195001	7200000	1.10451	7	-0.22078	-0.310761	-0.120944	-0.0231337	0.162424	-0.0331397	-0.138064
chr1	7200001	7205000	1.10229	7	0.0803144	0.113234	0.227795	-0.191534	0.00625821	0.0581981	-0.1532
chr1	7205001	7210000	1.10031	7	-0.0260109	0.00450084	-0.0670641	-0.224907	-0.0420413	-0.0280507	-0.112412
chr1	7210001	7215000	1.09923	7	0.0558304	0.223226	0.0861116	-0.227262	0.0217475	-0.0629578	-0.23145
chr1	7215001	7220000	1.0997	7	-0.230447	-0.140397	-0.142017	-0.136917	0.020747	-0.0465574	-0.466854
chr1	7220001	7225000	1.10237	7	-0.509248	-0.484699	-0.497929	0.0404095	0.26256	-0.0400101	-0.246332
chr1	7225001	7230000	1.10792	7	-0.563786	-0.506096	-0.626017	-0.0155447	0.100391	-0.324951	-0.22491
chr1	7230001	7235000	1.11348	7	-0.599829	-0.577378	-0.85471	0.114552	0.193839	-0.241684	-0.17147
chr1	7235001	7240000	1.11724	7	-0.32178	-0.352517	-0.429974	0.061495	0.193029	-0.0777049	-0.187967
chr1	7240001	7245000	1.12139	7	0.083754	0.146595	0.191127	-0.0729034	-0.0320638	0.06103	-0.113888
chr1	7245001	7250000	1.1281	7	-0.209595	-0.185351	-0.241306	0.046553	0.183119	-0.147214	-0.1535
chr1	7250001	7255000	1.13958	7	-0.383746	-0.409366	-0.405307	0.0143318	0.132453	-0.175156	-0.216468
chr1	7255001	7260000	1.15682	7	-0.28207	-0.273374	-0.408331	-0.127461	0.225898	-0.0420742	-0.124479
chr1	7260001	7265000	1.17785	7	-0.22401	-0.127796	-0.243677	-0.0406862	0.205336	-0.0239912	-0.173523
chr1	7265001	7270000	1.20041	7	-0.346559	-0.162185	-0.236986	-0.0338455	0.250426	0.0163525	-0.371753
chr1	7270001	7275000	1.22225	7	0.117122	0.299954	0.296415	-0.00856754	0.0125632	0.144517	-0.25973
chr1	7275001	7280000	1.24733	7	0.0352845	0.290935	0.0576821	-0.0372888	0.058265	0.216698	-0.15159
chr1	7280001	7285000	1.27881	7	-0.391231	-0.264887	-0.522752	0.0531919	0.180182	0.0791813	-0.14061
chr1	7285001	7290000	1.31327	7	-0.464468	-0.536918	-0.561984	0.0677416	0.232377	0.0201139	-0.206175
chr1	7290001	7295000	1.34728	7	-0.44603	-0.546712	-0.414106	-0.00311628	0.257925	-0.162416	-0.149141
chr1	7295001	7300000	1.3774	7	-0.437793	-0.442781	-0.304608	0.0025647	0.262496	-0.0494361	-0.0904906
chr1	7300001	7305000	1.41506	7	-0.175791	-0.157918	-0.187051	-0.100745	0.125888	-0.00575362	-0.158597
chr1	7305001	7310000	1.4651	7	0.419097	0.416356	0.191172	-0.24679	-0.0433255	0.137323	-0.144955
chr1	7310001	7315000	1.51423	7	-0.0528399	-0.240079	-0.260896	-0.0566854	0.082654	0.0288285	-0.11637
chr1	7315001	7320000	1.54918	7	-0.304217	-0.353017	-0.383463	0.00417798	0.223291	0.0414026	-0.126921
chr1	7320001	7325000	1.57364	7	-0.237649	-0.145961	-0.169375	0.0063568	0.10729	0.179389	-0.318574
chr1	7325001	7330000	1.5986	7	-0.256426	-0.124892	-0.382408	0.083125	0.0564789	0.0225806	-0.187924
chr1	7330001	7335000	1.62169	8	-0.300457	-0.432423	-0.39724	0.117577	0.238544	-0.0554183	0.0481091
chr1	7335001	7340000	1.64054	8	-0.329179	-0.473104	-0.401934	0.225865	0.307664	-0.150616	-0.0537325
chr1	7340001	7345000	1.6528	8	-0.378299	-0.47738	-0.553771	0.123167	0.407868	-0.104882	-0.180711
chr1	7345001	7350000	1.64573	8	-0.500836	-0.479022	-0.82854	0.0853488	0.439941	-0.056114	-0.215733
chr1	7350001	7355000	1.61997	8	-0.503861	-0.56251	-0.857206	0.254195	0.318945	-0.113	-0.390143
chr1	7355001	7360000	1.59319	7	-0.557159	-0.641263	-0.681084	0.179231	0.323498	-0.136806	-0.151835
chr1	7360001	7365000	1.58309	7	-0.585926	-0.595572	-0.695453	0.159922	0.425065	-0.0363312	-0.156786
chr1	7365001	7370000	1.57801	7	-0.637447	-0.612944	-0.632245	0.302612	0.430481	0.00602565	0.0347409
chr1	7370001	7375000	1.56106	7	-0.530089	-0.586901	-0.634171	0.298747	0.425025	-0.050953	-0.114932
chr1	7375001	7380000	1.54208	7	-0.384971	-0.492025	-0.493801	0.197304	0.249206	0.0511376	-0.12774
chr1	7380001	7385000	1.5309	7	-0.319256	-0.321053	-0.418097	0.244557	0.160907	0.0861897	-0.0876316
chr1	7385001	7390000	1.53738	7	-0.699016	-0.792717	-0.813142	0.345297	0.289315	-0.0984791	-0.254044
chr1	7390001	7395000	1.55357	7	-0.292301	-0.31737	-0.24004	0.170075	0.275596	-0.0340655	-0.129793
chr1	7395001	7400000	1.56853	7	0.134184	0.338737	0.266613	-0.119107	0.0210219	0.137886	-0.0938096
chr1	7400001	7405000	1.58756	7	-0.389083	-0.217057	-0.307815	-0.0254981	0.260111	-0.120099	-0.196892
chr1	7405001	7410000	1.61597	8	-0.699694	-0.696018	-0.704899	0.288586	0.455709	-0.135794	-0.13022
chr1	7410001	7415000	1.65712	8	-0.245296	-0.372232	-0.298554	0.126256	0.203652	9.91636e-07	-0.0794701
chr1	7415001	7420000	1.70813	8	-0.56283	-0.512673	-0.547638	0.0207881	0.105662	-0.0789154	-0.150621
chr1	7420001	7425000	1.76501	8	-0.5716	-0.651846	-0.74557	0.367448	0.242669	-0.120294	-0.198166
chr1	7425001	7430000	1.82374	8	-0.234631	-0.547962	-0.484147	0.31151	0.23151	-0.0279292	-0.164719
chr1	7430001	7435000	1.8803	8	-0.539144	-0.496273	-0.598337	0.452467	0.494897	0.0781443	-0.116974
chr1	7435001	7440000	1.95273	8	-0.66129	-0.767803	-0.883369	0.371661	0.463743	0.0503625	-0.209491
chr1	7440001	7445000	2.04797	8	-0.593816	-0.67665	-0.866488	0.339777	0.496095	0.078654	0.0245578
chr1	7445001	7450000	2.14542	8	-0.529693	-0.708309	-0.863856	0.470384	0.335728	-0.0103783	0.0224622
chr1	7450001	7455000	2.22449	8	-0.674402	-0.769561	-0.97914	0.594679	0.370923	-0.0828783	-0.0638026
chr1	7455001	7460000	2.29951	8	-0.699297	-0.62942	-0.864862	0.59924	0.299836	0.0993368	-0.187825
chr1	7460001	7465000	2.39021	8	-0.449211	-0.618682	-0.538614	0.326611	0.389944	0.0617317	-0.0704936
chr1	7465001	7470000	2.48415	8	-0.602924	-0.786764	-0.767277	0.367375	0.451796	-0.0149446	-0.046897
chr1	7470001	7475000	2.56886	8	-0.850303	-0.793653	-0.852525	0.556103	0.507859	-0.0485142	-0.246422
chr1	7475001	7480000	2.63189	8	-0.513487	-0.609357	-0.686018	0.41996	0.483003	0.0814431	-0.031503
chr1	7480001	7485000	2.66811	8	-0.478301	-0.577859	-0.744282	0.426209	0.391626	0.0265695	-0.00985564
chr1	7485001	7490000	2.68859	8	-0.378449	-0.341476	-0.440227	0.613534	0.33707	0.0926451	0.0920765
chr1	7490001	7495000	2.70518	8	-0.396569	-0.405315	-0.720284	0.566694	0.3649	0.138823	-0.056583
chr1	7495001	7500000	2.72971	9	-0.454295	-0.286271	-0.449401	0.501117	0.420496	0.0792958	-0.194737
chr1	7500001	7505000	2.75093	9	-0.498933	-0.552363	-0.693721	0.50887	0.432299	0.139067	-0.0738088
chr1	7505001	7510000	2.75638	9	-0.631681	-0.614412	-0.834674	0.510057	0.333166	0.0542711	0.052199
chr1	7510001	7515000	2.75614	9	-0.603073	-0.691338	-0.800117	0.50205	0.327153	0.135734	0.0331779
chr1	7515001	7520000	2.76029	9	-0.579491	-0.63824	-0.710626	0.538575	0.347119	-0.0631444	0.0997234
chr1	7520001	7525000	2.77891	9	-0.264487	-0.401143	-0.403432	0.5182	0.207872	-0.00466312	0.167723
chr1	7525001	7530000	2.80132	9	-0.500458	-0.665549	-0.712313	0.605506	0.279678	0.0969677	0.10269
chr1	7530001	7535000	2.81625	9	-0.612702	-0.707278	-0.814543	0.659073	0.298675	0.138893	0.145265
chr1	7535001	7540000	2.83286	9	-0.584505	-0.711572	-0.752621	0.719663	0.38449	0.15705	0.0766523
chr1	7540001	7545000	2.86028	9	-0.234208	-0.371352	-0.382145	0.520296	0.264283	0.137619	0.196268
chr1	7545001	7550000	2.89832	9	-0.316204	-0.351937	-0.555202	0.379507	0.396721	0.0959993	-0.0588599
chr1	7550001	7555000	2.94032	9	-0.636654	-0.67494	-0.797881	0.465334	0.329801	0.217832	-0.141101
chr1	7555001	7560000	2.98582	9	-0.685048	-0.747935	-0.753666	0.615248	0.357622	0.194548	0.116272
chr1	7560001	7565000	3.03433	9	-0.825519	-0.75345	-0.86285	0.743656	0.342082	0.155059	0.0273695
chr1	7565001	7570000	3.08537	9	-0.657936	-0.472561	-0.777329	0.656795	0.441688	0.156117	0.064928
chr1	7570001	7575000	3.13845	9	-0.464543	-0.489666	-0.401381	0.475573	0.30472	0.341372	0.206723
chr1	7575001	7580000	3.19309	9	-0.529435	-0.809134	-0.698138	0.529667	0.311812	0.26195	0.104065
chr1	7580001	7585000	3.2488	9	-0.633795	-0.719337	-0.761575	0.702136	0.422141	0.325485	0.181279
chr1	7585001	7590000	3.31553	9	-0.66622	-0.831389	-0.821035	0.609397	0.339605	0.198725	0.195639
chr1	7590001	7595000	3.3973	9	-0.573613	-0.668888	-0.803862	0.548565	0.288021	0.153422	0.230449
chr1	7595001	7600000	3.48478	9	-0.357098	-0.440701	-0.536179	0.463883	0.29899	0.233121	0.116536
chr1	7600001	7605000	3.56861	9	-0.298734	-0.410146	-0.450489	0.32289	0.290659	0.358603	0.230355
chr1	7605001	7610000	3.63947	9	-0.453531	-0.607535	-0.787814	0.481585	0.382905	0.439461	0.331734
chr1	7610001	7615000	3.71573	9	-0.521526	-0.817373	-0.932027	0.568831	0.487987	0.207303	0.488283
chr1	7615001	7620000	3.8087	9	-0.274774	-0.579881	-0.646733	0.535562	0.434799	0.321974	0.418192
chr1	7620001	7625000	3.89839	10	-0.476805	-0.507455	-0.731899	0.522057	0.416407	0.393678	0.360253
chr1	7625001	7630000	3.96484	10	-0.629753	-0.595171	-0.805355	0.439983	0.264465	0.29884	0.435658
chr1	7630001	7635000	4.01134	10	-0.594411	-0.861695	-0.889831	0.693643	0.297391	0.37354	0.382781
chr1	7635001	7640000	4.05409	10	-0.487035	-0.801929	-0.78173	0.561152	0.304174	0.318193	0.341072
chr1	7640001	7645000	4.09239	10	-0.698135	-0.743977	-0.881324	0.561071	0.227462	0.41566	0.228741
chr1	7645001	7650000	4.12559	10	-0.72424	-0.821489	-0.861313	0.625845	0.263303	0.326398	0.331754
chr1	7655001	7660000	4.17399	10	-0.241552	-0.408772	-0.400863	0.508087	0.312723	0.405007	0.424743
chr1	7660001	7665000	4.18556	10	-0.738536	-0.800397	-1.04643	0.464967	0.192577	0.236361	0.352201
chr1	7665001	7670000	4.18838	10	-0.813786	-0.92635	-1.02189	0.612293	0.232874	0.281953	0.253767
chr1	7670001	7675000	4.18718	10	-0.816653	-0.814046	-0.938119	0.510216	0.178896	0.445161	0.284066
chr1	7675001	7680000	4.18668	10	-0.681693	-0.791416	-0.907168	0.481385	0.279709	0.379432	0.3253
chr1	7680001	7685000	4.17536	10	-0.685715	-0.915829	-0.969915	0.465868	0.230302	0.220367	0.306609
chr1	7695001	7700000	4.0529	10	-0.357803	-0.454763	-0.407577	0.26121	0.269752	0.393891	0.497957
chr1	7700001	7705000	4.00942	10	-0.420183	-0.544707	-0.411434	0.244884	0.153826	0.366067	0.230078
chr1	7705001	7710000	3.97805	10	-0.285134	-0.349138	-0.320354	0.304995	0.142933	0.329937	0.278543
chr1	7710001	7715000	3.96682	10	-0.118039	-0.171584	-0.189872	0.241888	0.107819	0.325556	0.553511
chr1	7715001	7720000	3.95999	10	-0.321488	-0.177399	-0.359606	0.262404	0.150495	0.310369	0.398304
chr1	7720001	7725000	3.9441	10	-0.258772	-0.328647	-0.353707	0.370921	0.094646	0.436515	0.458784
chr1	7725001	7730000	3.93072	10	-0.294792	-0.363857	-0.321769	0.340842	0.106736	0.338212	0.42368
chr1	7730001	7735000	3.9314	10	-0.266665	-0.387586	-0.313953	0.274996	0.000630835	0.178819	0.424932
chr1	7735001	7740000	3.94803	10	-0.329682	-0.372441	-0.250087	0.265769	0.0898595	0.133418	0.382269
chr1	7740001	7745000	3.97253	10	0.0269678	-0.0890858	-0.108202	0.100319	0.11156	0.275107	0.419601
chr1	7745001	7750000	4.00154	10	-0.215066	-0.195116	-0.246258	0.0338738	0.111886	0.303583	0.387129
chr1	7750001	7755000	4.03167	10	-0.138396	-0.188862	-0.105511	-0.020304	-0.00109585	0.249431	0.402935
chr1	7760001	7765000	4.0818	10	0.0648965	0.175399	0.160579	-0.157408	0.00655477	0.330256	0.523791
chr1	7765001	7770000	4.10858	10	0.102771	0.159059	-0.0235125	-0.0585384	0.00073388	0.220057	0.381955
chr1	7775001	7780000	4.18963	10	0.000860139	-0.182161	-0.169493	0.0214818	0.00499754	0.456893	0.456626
chr1	7780001	7785000	4.22834	10	-0.210223	-0.599552	-0.576286	-0.0936178	0.0788614	0.155995	0.144466
chr1	7785001	7790000	4.25544	10	0.0403611	-0.160725	-0.0437898	-0.113594	0.0131614	0.310509	0.314611
chr1	7790001	7795000	4.27681	10	-0.0896643	-0.0427156	-0.0157457	-0.081133	0.0329015	0.332271	0.393554
chr1	7795001	7800000	4.30251	10	-0.175971	-0.266508	-0.38369	-0.11015	0.12894	0.32475	0.346465
chr1	7805001	7810000	4.36116	10	-0.0859653	-0.0774274	0.186104	-0.0823852	0.218247	0.398876	0.430929
chr1	7810001	7815000	4.39123	10	-0.148895	-0.158785	-0.0316345	-0.0656246	-0.0216633	0.424234	0.392237
chr1	7830001	7835000	4.483	10	0.0527911	0.26945	-0.0636695	-0.0652852	-0.00105422	0.373895	0.413044
chr1	7835001	7840000	4.4949	10	-0.113346	0.0454582	-0.221689	0.0340675	0.0613305	0.360573	0.476281
chr1	7840001	7845000	4.50566	10	-0.158443	-0.15072	-0.146414	-0.0273507	0.0800439	0.491039	0.477647
chr1	7855001	7860000	4.52984	10	-0.338928	-0.470284	-0.529797	0.166181	0.00204726	0.476969	0.418272
chr1	7865001	7870000	4.53805	10	-0.470137	-0.480197	-0.597655	0.200802	0.191404	0.403184	0.476998
chr1	7870001	7875000	4.54005	10	-0.316996	-0.301645	-0.402664	0.201261	0.0896422	0.356979	0.528329
chr1	7885001	7890000	4.53966	10	-0.425793	-0.482317	-0.629729	0.161721	0.043793	0.449084	0.296337
chr1	7890001	7895000	4.53636	10	-0.256663	-0.341921	-0.51551	0.249157	0.0822083	0.568584	0.385631
chr1	7900001	7905000	4.52315	10	-0.347783	-0.300381	-0.387809	0.171623	-0.0873869	0.546384	0.36139
chr1	7915001	7920000	4.48214	10	-0.228186	-0.214255	-0.29568	0.148612	0.00122661	0.558795	0.444005
chr1	7920001	7925000	4.46553	10	-0.200851	-0.215298	-0.370901	0.205931	0.0112835	0.521126	0.453777
chr1	7925001	7930000	4.45126	10	-0.163964	-0.255514	-0.342379	0.159805	-0.0171885	0.579114	0.593919
chr1	7930001	7935000	4.4366	10	-0.220931	-0.229633	-0.366658	0.200851	-0.045026	0.598918	0.476032
chr1	7940001	7945000	4.39525	10	-0.179298	-0.197217	-0.396289	0.236297	-0.103579	0.534333	0.303733
chr1	7945001	7950000	4.36334	10	0.0226543	-0.144751	0.00478277	0.255716	-0.11692	0.680926	0.515941
chr1	7950001	7955000	4.32436	10	-0.377931	-0.568126	-0.482043	0.315032	-0.0747485	0.448227	0.222661
chr1	7960001	7965000	4.23659	10	-0.317199	-0.290986	-0.410307	0.0441618	-0.16937	0.560983	0.318552
chr1	7965001	7970000	4.19354	10	-0.108127	-0.245765	-0.0477304	0.18512	-0.114347	0.666604	0.438927
chr1	7970001	7975000	4.15488	10	-0.268812	-0.334753	-0.228914	-0.0397635	-0.115813	0.678402	0.375331
chr1	7975001	7980000	4.10456	10	-0.229239	-0.388189	-0.437698	-0.084084	0.0490799	0.58521	0.296945
chr1	7980001	7985000	4.03613	10	-0.616937	-0.612614	-0.771248	0.0993453	-0.047976	0.573863	0.282617
chr1	7985001	7990000	3.96681	10	-0.681362	-0.590831	-0.736755	0.0610141	-0.0391359	0.513384	0.323227
chr1	7990001	7995000	3.91384	10	-0.365381	-0.367763	-0.494057	-0.158358	-0.138642	0.560285	0.262203
chr1	8000001	8005000	3.82689	10	-0.292004	-0.302598	-0.410796	-0.174513	-0.0837217	0.449081	0.182204
chr1	8015001	8020000	3.67682	9	0.151516	0.0409134	0.00610949	-0.378648	-0.137957	0.481851	0.257977
chr1	8020001	8025000	3.62591	9	-0.060476	-0.131616	-0.0960935	-0.340432	-0.101932	0.461606	0.203198
chr1	8025001	8030000	3.57638	9	-0.108426	-0.161033	-0.295007	-0.133394	-0.128748	0.356758	0.0621561
chr1	8040001	8045000	3.44688	9	-0.0977411	-0.10971	-0.158449	-0.353831	-0.256078	0.497711	0.0220941
chr1	8045001	8050000	3.41371	9	0.103775	-0.0770533	-0.108431	-0.475109	-0.18475	0.346773	-0.0349089
chr1	8050001	8055000	3.38735	9	-0.164107	-0.256251	-0.381105	-0.352361	-0.193127	0.29769	0.0210281
chr1	8060001	8065000	3.35943	9	-0.366071	-0.373718	-0.372468	-0.339146	-0.37666	0.356609	0.0559353
chr1	8070001	8075000	3.3752	9	-0.131615	-0.150404	-0.156257	-0.268215	-0.228954	0.316598	0.0910957
chr1	8080001	8085000	3.42552	9	-0.257997	-0.330116	-0.288917	-0.25383	-0.0756411	0.321989	0.082624
chr1	8085001	8090000	3.4564	9	-0.149953	-0.104659	-0.237379	-0.166616	-0.148624	0.357081	0.0259895
chr1	8090001	8095000	3.48722	9	-0.215889	-0.221728	-0.379663	-0.151196	-0.0686012	0.310313	-0.0108815
chr1	8100001	8105000	3.53714	9	0.0400089	-0.0698278	0.010971	-0.227613	-0.323492	0.411327	0.333586
chr1	8110001	8115000	3.60394	9	-0.276251	-0.253147	-0.0399778	-0.0494819	-0.157301	0.598351	0.317975
chr1	8115001	8120000	3.64856	9	-0.412599	-0.52819	-0.472709	-0.104514	-0.198793	0.333815	0.13413
chr1	8120001	8125000	3.69033	9	-0.268943	-0.484895	-0.588657	-0.231649	-0.270624	0.391881	0.0403935
chr1	8125001	8130000	3.72146	9	-0.290697	-0.513575	-0.463691	-0.0621283	-0.186798	0.424859	0.108159
chr1	8135001	8140000	3.777	9	-0.509931	-0.466789	-0.45475	-0.293017	-0.162507	0.31578	0.265195
chr1	8140001	8145000	3.80976	9	-0.268076	-0.364313	-0.463428	-0.177366	-0.0925309	0.448405	0.288908
chr1	8150001	8155000	3.87924	10	-0.392256	-0.41935	-0.415654	-0.205321	-0.0696071	0.449251	0.259294
chr1	8165001	8170000	3.97539	10	-0.413991	-0.46568	-0.583902	0.0424392	-0.362184	0.306871	0.321373
chr1	8175001	8180000	4.02009	10	-0.0355267	-0.0388965	-0.203267	-0.0049336	-0.404587	0.633244	0.375192
chr1	8180001	8185000	4.02726	10	-0.0268938	-0.0756747	-0.173496	-0.0546134	-0.221606	0.493208	0.224784
chr1	8185001	8190000	4.02279	10	-0.172153	-0.171115	-0.329921	0.0224779	-0.158609	0.364622	0.281198
chr1	8190001	8195000	4.0171	10	-0.292646	-0.236468	-0.485638	-0.188691	-0.194108	0.385923	0.148478
chr1	8195001	8200000	4.02061	10	-0.450561	-0.399007	-0.600902	-0.00119095	0.00204574	0.417303	0.135529
chr1	8200001	8205000	4.0291	10	-0.474453	-0.664725	-0.733445	-0.0892533	0.0414451	0.272459	0.227988
chr1	8215001	8220000	4.03233	10	-0.518983	-0.607214	-0.570114	0.111095	-0.113817	0.451	0.242724
chr1	8225001	8230000	4.03445	10	-0.373646	-0.599374	-0.637999	0.168789	-0.157756	0.578015	0.240667
chr1	8230001	8235000	4.04106	10	-0.388223	-0.494534	-0.53694	0.0830297	-0.0995595	0.572564	0.354829
chr1	8235001	8240000	4.05383	10	-0.337158	-0.525047	-0.727386	0.156922	-0.111793	0.597726	0.309309
chr1	8240001	8245000	4.06415	10	-0.445717	-0.38302	-0.543251	0.173092	-0.210476	0.674353	0.414612
chr1	8245001	8250000	4.06651	10	-0.510192	-0.450769	-0.386941	0.199617	-0.201516	0.656092	0.486495
chr1	8250001	8255000	4.06742	10	-0.336233	-0.400217	-0.527168	0.103742	-0.123818	0.674003	0.369698
chr1	8260001	8265000	4.09095	10	-0.384134	-0.291559	-0.465652	0.196166	-0.00457537	0.571952	0.357011
chr1	8270001	8275000	4.15904	10	-0.31401	-0.356072	-0.379117	0.160052	-0.0761571	0.692772	0.272066
chr1	8275001	8280000	4.20088	10	-0.560715	-0.450927	-0.477526	0.198352	-0.0881105	0.45132	0.151656
chr1	8280001	8285000	4.24348	10	-0.462938	-0.306203	-0.427117	0.233224	0.0293851	0.589104	0.422281
chr1	8285001	8290000	4.28351	10	-0.131357	-0.0416254	-0.181505	0.252019	-0.0843962	0.62417	0.414301
chr1	8290001	8295000	4.31762	10	-0.2795	-0.340345	-0.243889	0.185547	0.0545671	0.55315	0.399235
chr1	8295001	8300000	4.35885	10	-0.388234	-0.435276	-0.341123	-0.0322966	-0.0771163	0.531246	0.498177
chr1	8300001	8305000	4.41333	10	-0.321772	-0.31224	-0.322106	-0.0995089	0.0119062	0.608437	0.359698
chr1	8305001	8310000	4.46742	10	-0.403962	-0.281263	-0.330663	0.0677157	-0.244655	0.622071	0.327309
chr1	8310001	8315000	4.50745	10	-0.27579	-0.246057	-0.332656	0.159685	-0.100626	0.529187	0.242891
chr1	8315001	8320000	4.55102	10	-0.7211	-0.570339	-0.747722	0.174296	-0.0743923	0.284331	0.159634
chr1	8320001	8325000	4.61481	10	-0.603369	-0.657303	-0.799825	0.104008	-0.0246657	0.480191	0.234912
chr1	8325001	8330000	4.68378	10	-0.510383	-0.602763	-0.728215	0.0682808	-0.0991531	0.373362	0.346749
chr1	8330001	8335000	4.74293	10	-0.68273	-0.785608	-0.756344	0.237595	-0.122602	0.30765	0.189236
chr1	8335001	8340000	4.77722	10	-0.694938	-0.671632	-0.705832	0.0545843	-0.0582324	0.315215	0.258029
chr1	8370001	8375000	4.77236	10	-0.444486	-0.357887	-0.522033	-0.0317083	-0.0135605	0.372467	0.261258
chr1	8380001	8385000	4.73207	10	-0.2685	-0.465498	-0.419744	-0.00793855	-0.0252267	0.367358	0.283538
chr1	8390001	8395000	4.67789	10	-0.0962055	-0.0353507	-0.162862	-0.116867	-0.214054	0.355114	0.171944
chr1	8395001	8400000	4.64617	10	-0.0838059	0.0769349	-0.0808565	-0.243857	-0.1484	0.33413	0.144933
chr1	8400001	8405000	4.59758	10	-0.105772	-0.137811	-0.19811	-0.0728813	-0.101276	0.362714	0.102559
chr1	8405001	8410000	4.52554	10	-0.278987	-0.210747	-0.294074	-0.0810127	-0.223822	0.359008	0.312651
chr1	8410001	8415000	4.44116	10	-0.160375	-0.111931	-0.202077	-0.137941	-0.133009	0.398471	0.166275
chr1	8420001	8425000	4.27984	10	-0.354052	-0.294487	-0.368829	-0.161944	-0.0774487	0.323104	0.0445432
chr1	8425001	8430000	4.22514	10	-0.334821	-0.376087	-0.445777	-0.174765	-0.137631	0.418196	0.124997
chr1	8430001	8435000	4.17026	10	-0.160089	-0.280181	-0.154539	-0.249585	-0.0713445	0.195308	0.0922279
chr1	8435001	8440000	4.09798	10	-0.0885664	-0.210277	-0.173291	-0.22342	-0.0926944	0.190719	0.0619599
chr1	8440001	8445000	4.02541	10	-0.363038	-0.33308	-0.477638	-0.170836	-0.101191	0.188461	0.000980639
chr1	8445001	8450000	3.96962	10	-0.411747	-0.527031	-0.499537	-0.210608	-0.188939	0.208287	-0.00550232
chr1	8450001	8455000	3.93392	10	-0.239473	-0.451691	-0.345897	-0.128726	-0.179078	0.0899255	-0.0128769
chr1	8460001	8465000	3.89098	10	-0.232895	-0.17988	-0.270655	-0.326696	-0.185772	0.3351	0.0611262
chr1	8465001	8470000	3.87867	10	-0.259026	-0.0974061	-0.344105	-0.333806	-0.245969	0.167468	-0.0429633
chr1	8470001	8475000	3.8691	10	-0.13422	-0.0370166	-0.208152	-0.484244	-0.21119	0.12102	-0.200863
chr1	8475001	8480000	3.85973	10	-0.0782981	-0.134767	-0.132422	-0.462439	-0.125718	0.143007	-0.0617745
chr1	8480001	8485000	3.86566	10	-0.0713322	-0.0164618	-0.0483074	-0.288029	-0.221591	0.12124	0.111498
chr1	8485001	8490000	3.89269	10	0.0789723	0.0666729	-0.0584281	-0.383603	-0.33684	0.208534	-0.00598515
chr1	8490001	8495000	3.92439	10	-0.192635	-0.037522	-0.173206	-0.274864	-0.270456	0.262022	-0.163496
chr1	8495001	8500000	3.94431	10	-0.0987821	-0.190867	-0.279836	-0.258963	-0.162817	0.0817468	-0.117506
chr1	8500001	8505000	3.96736	10	-0.113533	-0.295731	-0.162765	-0.245793	-0.268178	-0.0534577	-0.0882112
chr1	8505001	8510000	4.01183	10	-0.107363	-0.166523	-0.166881	-0.370975	-0.241884	-0.0359415	-0.0505
chr1	8515001	8520000	4.1196	10	-0.102936	-0.0701297	-0.0125962	-0.278255	-0.211682	0.0562461	-0.115728
chr1	8520001	8525000	4.16021	10	-0.159211	-0.0849396	-0.142342	-0.397544	-0.15432	0.0977155	-0.10575
chr1	8525001	8530000	4.17684	10	-0.0547751	-0.0728656	-0.0071464	-0.455571	-0.0806935	-0.00476143	-0.109746
chr1	8530001	8535000	4.18117	10	-0.0487701	-0.0773221	-0.0696649	-0.421763	-0.221121	0.055419	-0.0428739
chr1	8535001	8540000	4.18774	10	-0.0965557	0.0720532	0.0252101	-0.387699	-0.219788	0.0331364	0.0238795
chr1	8540001	8545000	4.18953	10	0.0986333	0.110835	0.104432	-0.4065	-0.209063	0.110444	0.0432325
chr1	8545001	8550000	4.1795	10	0.0516772	0.168341	0.00215849	-0.316417	-0.25035	0.0790119	-0.193895
chr1	8550001	8555000	4.14098	10	-0.133359	-0.172093	-0.214116	-0.373556	-0.237511	0.0602128	-0.112194
chr1	8555001	8560000	4.07386	10	-0.0425731	0.0300297	-0.124279	-0.474776	-0.210186	0.000125575	-0.00888947
chr1	8560001	8565000	3.99597	10	-0.0182689	0.108192	0.0571151	-0.506963	-0.205561	0.0799167	-0.144171
chr1	8565001	8570000	3.92513	10	-0.0743946	0.0310911	-0.130482	-0.524921	-0.242546	0.022789	-0.107215
chr1	8570001	8575000	3.87917	10	0.200431	0.232108	0.051026	-0.463905	-0.441385	-0.0422428	0.0208556
chr1	8575001	8580000	3.83753	10	0.0508491	0.105951	0.078774	-0.454224	-0.236879	0.0785918	-0.0532968
chr1	8580001	8585000	3.78058	9	0.159991	0.0666676	0.15804	-0.4633	-0.223226	0.0687756	-0.109707
chr1	8585001	8590000	3.7275	9	-0.0864866	-0.121344	-0.146644	-0.537438	-0.21308	-0.0296428	-0.00725234
chr1	8590001	8595000	3.69748	9	-0.245736	-0.303261	-0.24374	-0.506651	-0.152844	-0.0332153	0.0546377
chr1	8595001	8600000	3.68697	9	-0.0560002	-0.20093	-0.0781149	-0.431912	-0.123021	0.0864314	0.0587107
chr1	8600001	8605000	3.67988	9	-0.110952	-0.154637	-0.396853	-0.468115	-0.27617	-0.0318426	-0.152214
chr1	8605001	8610000	3.67658	9	-0.015495	-0.118772	-0.226987	-0.451518	-0.246779	-0.106557	-0.195573
chr1	8610001	8615000	3.67747	9	-0.0326521	0.0717902	-0.00871185	-0.539659	-0.169364	-0.0923592	0.0873346
chr1	8615001	8620000	3.68291	9	0.0926061	0.184738	0.132584	-0.51922	-0.0645231	0.0559367	0.00141755
chr1	8620001	8625000	3.69136	9	-0.011487	-0.0146249	0.037345	-0.520786	-0.119408	0.0558754	0.0755822
chr1	8625001	8630000	3.70163	9	-0.0966835	-0.108224	-0.22524	-0.510629	-0.257877	-0.108626	-0.111222
chr1	8630001	8635000	3.71464	9	0.0523313	0.161743	-0.105733	-0.53922	-0.26037	0.128466	0.102705
chr1	8635001	8640000	3.73133	9	0.112212	0.20765	0.102444	-0.470335	-0.330092	0.0776321	0.191763
chr1	8640001	8645000	3.75997	9	-0.0184078	0.123136	0.00362565	-0.512393	-0.229074	0.0662412	0.281541
chr1	8645001	8650000	3.80404	9	-0.108644	-0.0891055	-0.0165673	-0.500786	-0.199147	0.100768	0.0979836
chr1	8650001	8655000	3.85724	10	-0.268273	-0.362548	-0.330503	-0.552917	-0.224434	-0.0653388	-0.0469005
chr1	8655001	8660000	3.9133	10	-0.126796	-0.274976	-0.434661	-0.456964	-0.322762	0.0530143	-0.163465
chr1	8665001	8670000	4.00887	10	-0.149041	-0.0230445	-0.152515	-0.511825	-0.182192	0.126288	0.115249
chr1	8670001	8675000	4.06062	10	0.0562936	0.0282454	0.00473267	-0.495456	-0.331764	-0.0261301	0.228366
chr1	8675001	8680000	4.13407	10	-0.00828658	-0.0249886	-0.117962	-0.513256	-0.226263	0.146614	0.168566
chr1	8680001	8685000	4.21447	10	0.0752919	-0.0135738	-0.024536	-0.556947	-0.200074	0.0645078	0.110588
chr1	8690001	8695000	4.33712	10	0.0924988	0.14793	-0.0775473	-0.530021	-0.358225	0.106598	0.12159
chr1	8700001	8705000	4.40773	10	-0.132957	-0.305367	-0.0672164	-0.466623	-0.199822	-0.0127759	0.0774598
chr1	8705001	8710000	4.44204	10	-0.121802	-0.188537	-0.138506	-0.451361	-0.220294	0.107794	0.134397
chr1	8710001	8715000	4.47286	10	0.0300769	0.107333	-0.103105	-0.484264	-0.284608	0.247073	0.213307
chr1	8715001	8720000	4.49809	10	-0.0176064	0.0186403	-0.0250983	-0.467483	-0.293099	0.331164	0.198713
chr1	8725001	8730000	4.52328	10	-0.249298	-0.222048	-0.287014	-0.397731	-0.318166	0.058765	0.244952
chr1	8730001	8735000	4.51441	10	-0.0774257	-0.16026	0.0413072	-0.306649	-0.239053	0.0682779	0.304278
chr1	8740001	8745000	4.45746	10	0.0342719	0.103637	0.0712791	-0.291178	-0.0895836	0.225588	0.275915
chr1	8745001	8750000	4.42698	10	-0.164321	-0.215682	-0.0918448	-0.350822	-0.13262	0.277196	0.322722
chr1	8750001	8755000	4.4069	10	0.181017	0.0475166	0.197559	-0.438241	-0.267042	0.386235	0.445068
chr1	8755001	8760000	4.39181	10	0.139492	0.0956998	0.0540404	-0.252023	-0.283381	0.433068	0.415768
chr1	8765001	8770000	4.3475	10	-0.0920565	-0.190649	-0.252113	-0.232549	-0.263622	0.341423	0.360915
chr1	8770001	8775000	4.3214	10	-0.0633447	-0.149214	-0.221156	-0.271459	-0.288175	0.470998	0.32659
chr1	8785001	8790000	4.24606	10	-0.158429	-0.222248	-0.265627	-0.102615	-0.119753	0.460869	0.509512
chr1	8790001	8795000	4.22714	10	-0.210432	-0.140484	-0.279772	-0.0678232	-0.254535	0.420102	0.393236
chr1	8795001	8800000	4.20855	10	-0.320487	-0.275026	-0.479697	-0.0316484	-0.348254	0.446157	0.448154
chr1	8800001	8805000	4.1863	10	-0.277658	-0.199478	-0.286345	0.0143028	-0.207811	0.505489	0.595923
chr1	8810001	8815000	4.13586	10	0.0105	-0.0424747	-0.0563364	0.028384	-0.25426	0.617382	0.465293
chr1	8820001	8825000	4.086	10	-0.309798	-0.152816	-0.232169	0.0385661	-0.356611	0.303726	0.259626
chr1	8825001	8830000	4.05987	10	-0.659787	-0.381851	-0.512273	0.0377061	-0.385365	0.426877	0.340709
chr1	8830001	8835000	4.02864	10	-0.479346	-0.455901	-0.520108	0.0408337	-0.38377	0.595637	0.220736
chr1	8850001	8855000	3.88131	10	-0.541144	-0.4678	-0.541028	0.150622	-0.42661	0.53464	0.332347
chr1	8855001	8860000	3.84604	10	-0.52314	-0.440806	-0.553064	0.0453166	-0.294506	0.507589	0.413436
chr1	8875001	8880000	3.75411	9	-0.464671	-0.636407	-0.561039	0.0117634	-0.342452	0.224117	0.268044
chr1	8880001	8885000	3.74993	9	-0.448007	-0.524615	-0.586941	0.202907	-0.191689	0.337846	0.251993
chr1	8885001	8890000	3.75157	9	-0.556521	-0.551836	-0.651635	0.120492	-0.268003	0.406157	0.371866
chr1	8890001	8895000	3.75518	9	-0.493636	-0.414405	-0.516021	-0.0574147	-0.382564	0.440195	0.345106
chr1	8895001	8900000	3.75693	9	-0.389957	-0.210955	-0.394883	-0.0250539	-0.245265	0.448067	0.41136
chr1	8900001	8905000	3.75834	9	-0.498225	-0.445842	-0.597059	0.0350787	-0.242431	0.496877	0.150735
chr1	8905001	8910000	3.76276	9	-0.519775	-0.375937	-0.617115	0.0998748	-0.262123	0.490576	0.252437
chr1	8910001	8915000	3.76907	9	-0.424719	-0.478464	-0.66561	0.134808	-0.146394	0.554724	0.49203
chr1	8915001	8920000	3.77612	9	-0.188989	-0.317429	-0.470004	0.17251	-0.152651	0.651266	0.423574
chr1	8920001	8925000	3.7828	9	-0.60334	-0.579887	-0.640973	0.243001	-0.0907814	0.651527	0.546865
chr1	8925001	8930000	3.78473	9	-0.559701	-0.547205	-0.52182	0.0968872	-0.0824161	0.41654	0.528826
chr1	8930001	8935000	3.78117	9	-0.252623	-0.264174	-0.383939	0.0549908	-0.110197	0.442524	0.429782
chr1	8935001	8940000	3.77647	9	-0.239875	-0.238325	-0.46805	0.25465	-0.122887	0.584143	0.674244
chr1	8945001	8950000	3.78093	9	-0.738414	-0.607684	-0.757618	0.383289	-0.201295	0.430669	0.551799
chr1	8950001	8955000	3.79594	9	-0.532021	-0.429333	-0.510126	0.297256	-0.0143196	0.413131	0.615709
chr1	8965001	8970000	3.87942	10	-0.336003	-0.520471	-0.535211	0.383947	0.0753124	0.478146	0.472301
chr1	8970001	8975000	3.91692	10	-0.431166	-0.482552	-0.540121	0.220745	0.0185515	0.494712	0.398265
chr1	8980001	8985000	4.00077	10	-0.312096	-0.238708	-0.497205	0.285357	0.0310495	0.598736	0.373916
chr1	8985001	8990000	4.04524	10	-0.491736	-0.617055	-0.541486	0.455167	0.00198814	0.497229	0.360113
chr1	8995001	9000000	4.13456	10	-0.400649	-0.29099	-0.413422	0.243522	0.100656	0.5312	0.564217
chr1	9000001	9005000	4.17753	10	-0.583079	-0.528514	-0.51946	0.404355	0.00333009	0.44975	0.360192
chr1	9020001	9025000	4.31613	10	-0.541718	-0.590119	-0.583953	0.32368	0.0610728	0.466427	0.376434
chr1	9025001	9030000	4.33939	10	-0.336256	-0.409591	-0.631731	0.339819	0.0128539	0.445035	0.372275
chr1	9040001	9045000	4.39468	10	-0.347583	-0.236411	-0.254957	0.455631	0.0491693	0.580689	0.275631
chr1	9050001	9055000	4.42529	10	-0.174665	-0.202577	-0.0547672	0.315133	-0.0385515	0.460275	0.470861
chr1	9055001	9060000	4.44048	10	-0.395763	-0.352098	-0.487647	0.383744	0.103522	0.456541	0.390875
chr1	9060001	9065000	4.45637	10	-0.493809	-0.445357	-0.66018	0.327038	0.0614583	0.416493	0.304613
chr1	9070001	9075000	4.4902	10	-0.46478	-0.592731	-0.640081	0.436384	0.0382248	0.299044	0.401526
chr1	9075001	9080000	4.5071	10	-0.253039	-0.44555	-0.576687	0.26399	0.0368058	0.39535	0.353875
chr1	9080001	9085000	4.52331	10	-0.291306	-0.425568	-0.308217	0.251048	0.0441401	0.480623	0.368228
chr1	9085001	9090000	4.53833	10	-0.489316	-0.458984	-0.556624	0.340547	0.114816	0.289358	0.415184
chr1	9090001	9095000	4.55424	10	-0.337537	-0.398177	-0.458734	0.218736	0.114627	0.383724	0.468264
chr1	9095001	9100000	4.5723	10	-0.393304	-0.455568	-0.560536	0.259959	-0.0388916	0.312805	0.453214
chr1	9100001	9105000	4.59081	10	-0.703087	-0.685153	-0.712684	0.255021	-0.116486	0.289775	0.434055
chr1	9105001	9110000	4.60806	10	-0.619984	-0.543519	-0.712432	0.338871	-0.03066	0.269573	0.32397
chr1	9115001	9120000	4.63197	10	-0.646099	-0.563342	-0.746623	0.324389	-0.000996063	0.316054	0.364446
chr1	9120001	9125000	4.63449	10	-0.332391	-0.342601	-0.543151	0.330127	0.0516243	0.398406	0.355639
chr1	9130001	9135000	4.62284	10	-0.189615	-0.437601	-0.551283	0.129824	-0.114036	0.371318	0.181604
chr1	9140001	9145000	4.60774	10	-0.338425	-0.456893	-0.629685	0.163393	-0.158306	0.107755	0.141165
chr1	9145001	9150000	4.60594	10	-0.403661	-0.434043	-0.512459	0.187681	-0.157625	0.0698362	0.272402
chr1	9150001	9155000	4.60692	10	-0.592307	-0.614742	-0.632187	0.354402	-0.0793675	0.215931	0.349377
chr1	9155001	9160000	4.60694	10	-0.52391	-0.534719	-0.756911	0.38577	-0.0711784	0.169699	0.326099
chr1	9165001	9170000	4.60485	10	-0.492168	-0.719308	-0.706059	0.271878	-0.0123955	0.209347	0.158724
chr1	9170001	9175000	4.60309	10	-0.436497	-0.397436	-0.556729	0.23042	-0.0454469	0.310604	0.325741
chr1	9185001	9190000	4.59715	10	-0.29526	-0.526032	-0.628645	0.320094	-0.21561	0.367005	0.495095
chr1	9190001	9195000	4.59851	10	-0.39471	-0.520314	-0.790865	0.407889	-0.0960524	0.539354	0.392645
chr1	9195001	9200000	4.60398	10	-0.64114	-0.721531	-0.931479	0.31163	-0.0925383	0.605627	0.38834
chr1	9200001	9205000	4.61036	10	-0.685012	-0.556605	-0.821917	0.287249	-0.0406704	0.681531	0.511854
chr1	9210001	9215000	4.61299	10	-0.364657	-0.434237	-0.432908	0.413831	-0.117446	0.706035	0.458228
chr1	9215001	9220000	4.60743	10	-0.454728	-0.455758	-0.470446	0.245181	-0.18387	0.673601	0.564302
chr1	9220001	9225000	4.60111	10	-0.50232	-0.457296	-0.620696	0.282125	-0.15331	0.629332	0.447088
chr1	9230001	9235000	4.58517	10	-0.663409	-0.676442	-0.836859	0.28401	-0.175361	0.461983	0.331521
chr1	9235001	9240000	4.57503	10	-0.386151	-0.451351	-0.624919	0.219626	-0.0450852	0.440029	0.464623
chr1	9240001	9245000	4.56309	10	-0.501234	-0.523977	-0.657187	0.367474	-0.0148643	0.411241	0.628394
chr1	9255001	9260000	4.48919	10	-0.430318	-0.203038	-0.276632	0.212617	-0.0315973	0.512137	0.409675
chr1	9260001	9265000	4.45914	10	-0.44769	-0.517067	-0.64001	0.579678	0.171449	0.49829	0.539941
chr1	9265001	9270000	4.43277	10	-0.586552	-0.736889	-0.843565	0.444701	-0.00364135	0.334899	0.425238
chr1	9270001	9275000	4.41388	10	-0.621199	-0.627809	-0.722087	0.41369	-0.0975877	0.434761	0.452532
chr1	9285001	9290000	4.35714	10	-0.358766	-0.444556	-0.416467	0.282921	0.0297968	0.641302	0.578657
chr1	9290001	9295000	4.33551	10	-0.553191	-0.571368	-0.739554	0.279584	-0.0378693	0.270129	0.112699
chr1	9295001	9300000	4.31503	10	-0.439518	-0.513872	-0.52616	0.282688	0.0804724	0.433039	0.328829
chr1	9300001	9305000	4.29723	10	-0.474368	-0.484344	-0.640103	0.359803	0.0680782	0.44906	0.373471
chr1	9310001	9315000	4.27567	10	-0.4751	-0.607797	-0.763792	0.29448	-0.0179991	0.263083	0.370877
chr1	9320001	9325000	4.25924	10	-0.660976	-0.760555	-0.856909	0.338712	0.221632	0.223075	0.371977
chr1	9325001	9330000	4.24862	10	-0.493073	-0.666693	-0.70498	0.359813	0.0977957	0.257063	0.30659
chr1	9330001	9335000	4.23909	10	-0.555304	-0.525279	-0.654413	0.128005	-0.00478139	0.271586	0.249552
chr1	9340001	9345000	4.23133	10	-0.620309	-0.700897	-0.742399	0.349026	0.143464	0.343542	0.300868
chr1	9345001	9350000	4.23817	10	-0.607926	-0.562191	-0.612681	0.251853	0.0612719	0.365835	0.306847
chr1	9355001	9360000	4.27341	10	-0.622426	-0.794436	-0.882149	0.372427	0.19361	0.252713	0.325278
chr1	9365001	9370000	4.3196	10	-0.590919	-0.575821	-0.676867	0.411636	-0.0592015	0.30829	0.321218
chr1	9370001	9375000	4.34012	10	-0.503412	-0.608886	-0.639328	0.406275	0.122394	0.31379	0.468944
chr1	9375001	9380000	4.35537	10	-0.563504	-0.683143	-0.81952	0.44477	0.144198	0.400184	0.467212
chr1	9395001	9400000	4.47789	10	-0.68632	-0.768672	-0.799915	0.439636	-0.00104255	0.42395	0.339469
chr1	9400001	9405000	4.51295	10	-0.595056	-0.65549	-0.719621	0.320536	0.0527667	0.36731	0.338914
chr1	9405001	9410000	4.54055	10	-0.455707	-0.402756	-0.462452	0.326777	-0.0102091	0.453309	0.415185
chr1	9410001	9415000	4.5561	10	-0.494663	-0.511727	-0.762446	0.311492	-0.0811769	0.443968	0.284382
chr1	9420001	9425000	4.57047	10	-0.536836	-0.427686	-0.695414	0.352937	0.00409237	0.450551	0.576829
chr1	9425001	9430000	4.57607	10	-0.50283	-0.442043	-0.625725	0.466554	-0.0440405	0.403544	0.459316
chr1	9430001	9435000	4.58024	10	-0.463085	-0.526944	-0.611781	0.463225	-0.0822656	0.588351	0.49766
chr1	9435001	9440000	4.58273	10	-0.34264	-0.612513	-0.253584	0.331095	0.0877258	0.604715	0.593428
chr1	9440001	9445000	4.58326	10	-0.366082	-0.52222	-0.422857	0.455694	0.177962	0.569545	0.514188
chr1	9450001	9455000	4.56143	10	-0.297358	-0.549338	-0.36994	0.289235	0.0339584	0.418176	0.388199
chr1	9455001	9460000	4.54059	10	-0.383119	-0.515715	-0.598733	0.481542	0.0409797	0.437333	0.398542
chr1	9460001	9465000	4.51813	10	-0.31732	-0.33055	-0.506487	0.40845	-0.133332	0.548488	0.565716
chr1	9470001	9475000	4.48339	10	-0.499688	-0.642591	-0.707748	0.521842	0.0191803	0.489679	0.465841
chr1	9485001	9490000	4.44024	10	-0.491896	-0.605263	-0.663394	0.450941	-0.0298621	0.508903	0.568051
chr1	9490001	9495000	4.42205	10	-0.38569	-0.572357	-0.675117	0.312854	-0.151166	0.496323	0.444937
chr1	9495001	9500000	4.40305	10	-0.378215	-0.513851	-0.60359	0.327036	0.0329923	0.487127	0.484898
chr1	9500001	9505000	4.38389	10	-0.44359	-0.425548	-0.403779	0.269839	0.0660254	0.47871	0.606024
chr1	9505001	9510000	4.36522	10	-0.45629	-0.459402	-0.669883	0.26538	-0.0135477	0.607936	0.621525
chr1	9510001	9515000	4.34769	10	-0.422162	-0.366458	-0.360102	0.229766	-0.0341732	0.562855	0.497647
chr1	9515001	9520000	4.33196	10	-0.512912	-0.460412	-0.622801	0.426806	-0.0826867	0.611167	0.543015
chr1	9520001	9525000	4.31868	10	-0.526131	-0.487606	-0.646997	0.375542	-0.126883	0.44739	0.407815
chr1	9525001	9530000	4.30527	10	-0.587842	-0.690653	-0.653539	0.378714	-0.0825267	0.36894	0.506701
chr1	9530001	9535000	4.2899	10	-0.411467	-0.490502	-0.545105	0.325132	-0.0481638	0.553144	0.38965
chr1	9535001	9540000	4.27425	10	-0.397985	-0.364045	-0.50145	0.19878	-0.213742	0.505078	0.335069
chr1	9540001	9545000	4.26007	10	-0.437412	-0.398999	-0.444867	0.247087	-0.127236	0.366182	0.235709
chr1	9545001	9550000	4.24906	10	-0.400227	-0.221444	-0.441661	0.451529	-0.036669	0.415457	0.566863
chr1	9550001	9555000	4.24103	10	-0.182989	-0.209492	-0.389483	0.288396	-0.13829	0.42466	0.580738
chr1	9555001	9560000	4.23437	10	-0.222848	-0.273473	-0.31839	0.23192	-0.016911	0.464192	0.585739
chr1	9560001	9565000	4.2286	10	-0.138261	-0.468423	-0.223016	0.168443	-0.0932059	0.415827	0.50776
chr1	9565001	9570000	4.22326	10	-0.165098	-0.282129	-0.322346	0.216119	-0.13785	0.505332	0.662641
chr1	9575001	9580000	4.20669	10	-0.384994	-0.407314	-0.377762	0.342838	-0.0385849	0.486098	0.516304
chr1	9580001	9585000	4.19582	10	-0.264651	-0.383941	-0.227685	0.220847	-0.0697677	0.561767	0.62905
chr1	9585001	9590000	4.18492	10	-0.471243	-0.475051	-0.674468	0.214186	-0.100893	0.295533	0.405762
chr1	9605001	9610000	4.16675	10	-0.838927	-0.87064	-0.777337	0.402018	0.095583	0.709447	0.597687
chr1	9610001	9615000	4.17496	10	-0.820119	-0.810034	-0.878115	0.39614	-0.216571	0.634793	0.519548
chr1	9615001	9620000	4.18785	10	-0.626236	-0.578445	-0.710144	0.228316	-0.20294	0.564546	0.493168
chr1	9625001	9630000	4.2192	10	-0.8567	-0.771131	-0.951129	0.271723	-0.309996	0.403742	0.259832
chr1	9635001	9640000	4.25617	10	-0.504213	-0.61632	-0.73605	0.0784424	-0.316997	0.443121	0.364894
chr1	9640001	9645000	4.27609	10	-0.491744	-0.624987	-0.741195	0.143825	-0.366526	0.47645	0.379168
chr1	9650001	9655000	4.34739	10	-0.533475	-0.77863	-0.926174	0.245868	-0.238715	0.417285	0.328799
chr1	9655001	9660000	4.39962	10	-0.502306	-0.535778	-0.767734	0.168089	-0.206224	0.38275	0.485141
chr1	9670001	9675000	4.57047	10	-0.373533	-0.440681	-0.525256	0.0914797	-0.254873	0.394978	0.430105
chr1	9675001	9680000	4.61766	10	-0.524484	-0.656818	-0.740126	0.00292473	-0.334582	0.442637	0.296983
chr1	9685001	9690000	4.67136	10	-0.703393	-0.705347	-0.730068	0.0301494	-0.335178	0.18821	0.264338
chr1	9705001	9710000	4.66537	10	-0.472004	-0.235962	-0.549432	-0.176646	-0.306851	0.215208	0.225319
chr1	9720001	9725000	4.63151	10	-0.738615	-0.800086	-0.920928	-0.0882646	-0.0808595	-0.00555337	0.125677
chr1	9725001	9730000	4.62018	10	-0.756372	-0.640114	-0.770287	-0.116904	-0.141945	0.151223	0.306878
chr1	9735001	9740000	4.60368	10	-0.575863	-0.474191	-0.652872	-0.275932	-0.169861	0.250167	0.339735
chr1	9740001	9745000	4.59602	10	-0.43488	-0.349468	-0.42747	-0.2853	-0.277707	0.389365	0.401484
chr1	9745001	9750000	4.58425	10	-0.329382	-0.341883	-0.430936	-0.220226	-0.303729	0.377614	0.370133
chr1	9755001	9760000	4.55364	10	-0.391972	-0.5179	-0.423165	-0.247354	-0.302454	0.305006	0.421153
chr1	9760001	9765000	4.53745	10	-0.530774	-0.624255	-0.713009	-0.14859	-0.300184	0.205764	0.360165
chr1	9770001	9775000	4.50991	10	-0.458947	-0.346873	-0.484213	-0.150432	-0.265793	0.489356	0.322594
chr1	9775001	9780000	4.49142	10	-0.402863	-0.314514	-0.476868	-0.0683156	-0.272826	0.282656	0.352576
chr1	9780001	9785000	4.46314	10	-0.171377	-0.308731	-0.317495	-0.108572	-0.30702	0.409329	0.414721
chr1	9785001	9790000	4.43336	10	-0.290079	-0.449212	-0.515554	-0.144512	-0.246626	0.409265	0.326097
chr1	9790001	9795000	4.41039	10	-0.325407	-0.503461	-0.556725	-0.107863	-0.37303	0.376492	0.425884
chr1	9805001	9810000	4.34275	10	-0.432033	-0.332234	-0.426207	-0.0104469	-0.306881	0.425905	0.377615
chr1	9810001	9815000	4.31582	10	-0.188992	-0.355107	-0.28142	-0.0673553	-0.441931	0.411998	0.328031
chr1	9820001	9825000	4.26274	10	-0.276448	-0.342119	-0.304903	-0.177406	-0.48545	0.374476	0.122584
chr1	9825001	9830000	4.23902	10	-0.412683	-0.575981	-0.58455	-0.137078	-0.367042	0.203518	0.211583
chr1	9830001	9835000	4.21883	10	-0.46783	-0.628273	-0.649912	-0.179477	-0.492031	0.39492	0.083963
chr1	9840001	9845000	4.20534	10	-0.586208	-0.862573	-0.860696	-0.0697309	-0.41898	0.419476	0.29872
chr1	9850001	9855000	4.22173	10	-0.43669	-0.519211	-0.721606	-0.0784698	-0.479479	0.271703	0.245224
chr1	9855001	9860000	4.23398	10	-0.530269	-0.533567	-0.672	-0.029921	-0.357342	0.471988	0.133872
chr1	9875001	9880000	4.24333	10	-0.421542	-0.508246	-0.482265	-0.188555	-0.329947	0.401978	0.304763
chr1	9880001	9885000	4.22545	10	-0.507534	-0.607162	-0.771219	-0.146853	-0.425741	0.374983	0.0402488
chr1	9890001	9895000	4.17661	10	-0.495085	-0.470991	-0.55456	-0.18084	-0.499212	0.350014	0.00142778
chr1	9900001	9905000	4.11808	10	-0.394052	-0.391239	-0.462305	-0.171272	-0.46627	0.428893	0.212667
chr1	9905001	9910000	4.08809	10	-0.340589	-0.581142	-0.560275	-0.0709759	-0.327479	0.379266	0.119359
chr1	9910001	9915000	4.05915	10	-0.327484	-0.511591	-0.565135	-0.109403	-0.481582	0.318179	-0.00939514
chr1	9920001	9925000	3.9636	10	-0.263411	-0.352979	-0.427071	-0.182779	-0.542227	0.416609	0.33119
chr1	9925001	9930000	3.89717	10	-0.00931586	-0.2239	-0.145999	-0.128514	-0.448323	0.465358	0.394387
chr1	9935001	9940000	3.76366	9	-0.197619	-0.196701	-0.36065	-0.0421756	-0.52336	0.552988	0.31938
chr1	9945001	9950000	3.67814	9	-0.204432	-0.380553	-0.411994	-0.0225434	-0.429101	0.485047	0.415475
chr1	9955001	9960000	3.63602	9	-0.418867	-0.514749	-0.447214	-0.0429377	-0.344164	0.361094	0.39702
chr1	9960001	9965000	3.61668	9	-0.450232	-0.542724	-0.433008	0.03497	-0.303748	0.432856	0.419749
chr1	9965001	9970000	3.60009	9	-0.300188	-0.259114	-0.365572	-0.0821198	-0.421681	0.446859	0.31876
chr1	9970001	9975000	3.58748	9	-0.237475	-0.377655	-0.451436	-0.0426494	-0.471338	0.371185	0.394339
chr1	9975001	9980000	3.58005	9	-0.428088	-0.546274	-0.486057	-0.0892711	-0.47946	0.30998	0.517631
chr1	9980001	9985000	3.58126	9	-0.439918	-0.526781	-0.367653	-0.0363805	-0.471641	0.454815	0.536814
chr1	9985001	9990000	3.59108	9	-0.406342	-0.418358	-0.605501	-0.0392496	-0.393769	0.46852	0.394092
chr1	9995001	10000000	3.62055	9	-0.539215	-0.526179	-0.863318	0.0355382	-0.386988	0.244891	0.2093
chr1	10000001	10005000	3.63218	9	-0.169813	-0.464013	-0.429308	-0.130822	-0.371675	0.452454	0.433485
chr1	10005001	10010000	3.64315	9	-0.285323	-0.345065	-0.452318	-0.206256	-0.393897	0.365654	0.440892
chr1	10010001	10015000	3.65832	9	-0.369193	-0.451366	-0.679801	0.0407433	-0.428892	0.35049	0.405511
chr1	10015001	10020000	3.67685	9	-0.244662	-0.411065	-0.694756	0.0366655	-0.462155	0.482106	0.385909
chr1	10020001	10025000	3.6979	9	-0.312467	-0.393891	-0.450454	0.128117	-0.397524	0.423044	0.322228
chr1	10025001	10030000	3.72063	9	-0.428498	-0.284414	-0.445716	0.138485	-0.290094	0.384755	0.269201
chr1	10030001	10035000	3.74419	9	-0.362099	-0.353903	-0.468672	0.0897792	-0.375426	0.304496	0.234061
chr1	10035001	10040000	3.76776	9	-0.169679	-0.335122	-0.397407	-0.0341521	-0.288101	0.6147	0.451806
chr1	10040001	10045000	3.79047	9	-0.429633	-0.538966	-0.765656	0.0517886	-0.228512	0.413924	0.389473
chr1	10045001	10050000	3.8219	10	-0.352509	-0.390751	-0.677639	0.0262218	-0.232774	0.510723	0.451693
chr1	10050001	10055000	3.86873	10	-0.333735	-0.494979	-0.420906	-0.149878	-0.259497	0.494549	0.498699
chr1	10055001	10060000	3.92584	10	-0.201973	-0.400524	-0.401496	-0.0521384	-0.331575	0.442211	0.488492
chr1	10060001	10065000	3.98808	10	-0.322416	-0.437118	-0.533351	-0.000309242	-0.220727	0.481018	0.436216
chr1	10080001	10085000	4.18585	10	-0.00753854	-0.254114	-0.286831	-0.245581	-0.190012	0.345992	0.35785
chr1	10095001	10100000	4.24614	10	-0.0883533	0.0288429	-0.109504	-0.313195	-0.29181	0.412851	0.506408
chr1	10100001	10105000	4.2627	10	-0.203892	-0.0702436	-0.0581089	-0.219219	-0.316781	0.330967	0.357252
chr1	10125001	10130000	4.30431	10	0.00951842	-0.0761655	-0.0253239	-0.257003	-0.270177	0.420383	0.430965
chr1	10130001	10135000	4.3021	10	-0.332276	-0.244554	-0.354152	-0.254611	-0.239345	0.318594	0.267655
chr1	10135001	10140000	4.29279	10	-0.145778	-0.0826685	-0.1994	-0.367922	-0.297002	0.420174	0.208958
chr1	10140001	10145000	4.27552	10	-0.171924	-0.136168	-0.210027	-0.360487	-0.303328	0.363754	0.364954
chr1	10150001	10155000	4.22959	10	-0.234308	-0.255059	-0.360367	-0.176186	-0.419859	0.191414	0.167995
chr1	10155001	10160000	4.20718	10	-0.251363	-0.295328	-0.274868	-0.304619	-0.380919	0.156848	0.250842
chr1	10160001	10165000	4.18931	10	-0.266418	-0.335708	-0.424532	-0.189264	-0.346567	0.178696	0.238599
chr1	10165001	10170000	4.16596	10	-0.417933	-0.546674	-0.506417	-0.133121	-0.412371	0.261913	0.187268
chr1	10170001	10175000	4.13047	10	-0.220736	-0.452552	-0.305346	-0.255861	-0.240874	0.223497	0.343429
chr1	10175001	10180000	4.09102	10	-0.216861	-0.362953	-0.283615	-0.253301	-0.244372	0.279327	0.317151
chr1	10185001	10190000	4.03294	10	-0.279669	-0.225241	-0.453678	-0.00776957	-0.327115	0.340075	0.0384302
chr1	10195001	10200000	3.99311	10	-0.453395	-0.379045	-0.562848	-0.229518	-0.42327	0.230658	-0.194233
chr1	10200001	10205000	3.96816	10	-0.182641	-0.160252	-0.465607	-0.13564	-0.330262	0.11687	-0.120593
chr1	10205001	10210000	3.94337	10	-0.245849	-0.310888	-0.522185	-0.181759	-0.330629	0.00449656	-0.050275
chr1	10210001	10215000	3.92138	10	-0.262921	-0.324346	-0.344558	-0.206466	-0.479718	0.0266914	-0.0943586
chr1	10215001	10220000	3.90484	10	-0.332094	-0.321389	-0.495565	-0.271509	-0.367939	0.0755896	0.0169743
chr1	10220001	10225000	3.89326	10	-0.253904	-0.299999	-0.302743	-0.271337	-0.355927	0.209848	0.143233
chr1	10225001	10230000	3.8836	10	-0.238328	-0.16553	-0.272825	-0.261445	-0.275787	0.302711	0.152516
chr1	10230001	10235000	3.87458	10	-0.243751	-0.012664	-0.200288	-0.36275	-0.224853	0.226312	0.14139
chr1	10235001	10240000	3.86499	10	-0.213773	-0.0909096	-0.218026	-0.218494	-0.425673	0.199472	0.135099
chr1	10240001	10245000	3.85863	10	-0.079574	-0.138667	-0.0833526	-0.188582	-0.395362	0.160895	0.163886
chr1	10245001	10250000	3.85911	10	-0.143273	-0.178073	-0.212103	-0.219551	-0.238698	0.168485	0.25006
chr1	10255001	10260000	3.87399	10	-0.25285	-0.081708	-0.277685	-0.316646	-0.393898	0.108375	0.0966109
chr1	10265001	10270000	3.89652	10	-0.230177	-0.262447	-0.292329	-0.242118	-0.411041	0.264481	0.188331
chr1	10285001	10290000	3.91222	10	-0.218422	-0.0784936	-0.126638	-0.382022	-0.281204	0.300812	0.149148
chr1	10295001	10300000	3.90934	10	0.0830505	0.0212018	0.0317809	-0.441662	-0.311151	0.266323	0.44586
chr1	10300001	10305000	3.91101	10	-0.0499748	-0.151327	-0.137966	-0.519115	-0.427416	0.222486	0.364562
chr1	10305001	10310000	3.90939	10	-0.081106	-0.0907416	-0.063003	-0.449366	-0.389715	0.247724	0.259762
chr1	10310001	10315000	3.90046	10	-0.226765	-0.288111	-0.309818	-0.284183	-0.291777	0.159327	0.0984413
chr1	10320001	10325000	3.85412	10	0.0058864	-0.0713908	0.0138735	-0.504915	-0.352015	0.19397	0.102726
chr1	10325001	10330000	3.82017	10	-0.144715	-0.123818	-0.114673	-0.509662	-0.331474	0.127184	0.212292
chr1	10330001	10335000	3.78181	9	-0.181663	-0.318474	-0.294134	-0.435276	-0.239434	0.271907	-0.0123269
chr1	10350001	10355000	3.62557	9	-0.225547	-0.271813	-0.214092	-0.327644	-0.431728	-0.0152297	0.181686
chr1	10355001	10360000	3.59617	9	-0.182885	-0.20066	-0.162878	-0.402413	-0.369739	0.0126206	0.153482
chr1	10360001	10365000	3.56622	9	-0.0818853	-0.251203	-0.275104	-0.360341	-0.361837	0.000163021	0.106734
chr1	10365001	10370000	3.53074	9	-0.147569	-0.218777	-0.390531	-0.271017	-0.318646	-0.0170312	-0.133549
chr1	10370001	10375000	3.49403	9	-0.309267	-0.41864	-0.479406	-0.429624	-0.280536	0.109798	-0.106737
chr1	10380001	10385000	3.43419	9	-0.384866	-0.382298	-0.292389	-0.443346	-0.428441	0.117818	-0.00752874
chr1	10385001	10390000	3.41656	9	-0.42596	-0.447928	-0.534774	-0.433545	-0.351741	-0.0436171	-0.0815597
chr1	10395001	10400000	3.39598	9	-0.304898	-0.385369	-0.522124	-0.440664	-0.32252	-0.0583232	-0.144024
chr1	10400001	10405000	3.38906	9	-0.235077	-0.476961	-0.466126	-0.368788	-0.33275	-0.0863505	-0.0935939
chr1	10405001	10410000	3.38172	9	-0.261169	-0.557341	-0.447632	-0.447333	-0.344374	0.0153109	-0.0785027
chr1	10410001	10415000	3.37199	9	-0.314585	-0.349756	-0.334025	-0.353071	-0.382679	0.113752	0.0888071
chr1	10420001	10425000	3.34672	9	-0.394319	-0.551332	-0.698152	-0.365025	-0.367848	0.0498331	-0.218219
chr1	10425001	10430000	3.33469	9	-0.526875	-0.543941	-0.624349	-0.379236	-0.341542	-0.101354	-0.141591
chr1	10430001	10435000	3.32499	9	-0.415276	-0.531719	-0.519699	-0.377074	-0.393273	-0.0523689	-0.161004
chr1	10435001	10440000	3.31904	9	-0.368014	-0.404874	-0.410829	-0.312045	-0.4733	0.0476718	-0.106473
chr1	10440001	10445000	3.31722	9	-0.423107	-0.455038	-0.490305	-0.446617	-0.280984	0.0391956	-0.236402
chr1	10445001	10450000	3.3183	9	-0.43276	-0.504165	-0.722805	-0.417079	-0.336025	0.00199592	-0.156477
chr1	10450001	10455000	3.32132	9	-0.483477	-0.50949	-0.462363	-0.3765	-0.29549	0.0121041	-0.0549612
chr1	10455001	10460000	3.32534	9	-0.3664	-0.381973	-0.477613	-0.487909	-0.344904	0.0595553	-0.12741
chr1	10460001	10465000	3.3294	9	-0.517805	-0.52851	-0.699226	-0.305943	-0.183711	-0.0588252	-0.0568498
chr1	10465001	10470000	3.34178	9	-0.458052	-0.467153	-0.497102	-0.41034	-0.205543	-0.0307984	-0.0687768
chr1	10470001	10475000	3.36465	9	-0.287697	-0.396619	-0.476932	-0.432226	-0.232502	-0.159401	-0.0958797
chr1	10475001	10480000	3.38793	9	-0.343733	-0.512322	-0.373115	-0.33096	-0.386679	-0.052896	-0.0725031
chr1	10480001	10485000	3.40156	9	-0.266771	-0.243722	-0.366491	-0.335288	-0.318821	0.0726245	-0.207112
chr1	10485001	10490000	3.40416	9	-0.291763	-0.240534	-0.429657	-0.307155	-0.349563	0.0363923	-0.0887336
chr1	10490001	10495000	3.40209	9	-0.388734	-0.33484	-0.45395	-0.350054	-0.234435	0.0929903	0.0202153
chr1	10495001	10500000	3.39688	9	-0.443626	-0.471353	-0.499314	-0.352725	-0.261415	0.214503	0.0274155
chr1	10500001	10505000	3.39004	9	-0.269167	-0.348288	-0.60532	-0.335042	-0.368895	0.242668	0.00331265
chr1	10505001	10510000	3.3831	9	-0.369727	-0.479389	-0.586295	-0.266595	-0.183393	0.14036	-0.119828
chr1	10510001	10515000	3.37757	9	-0.215407	-0.267094	-0.355429	-0.386181	-0.214743	0.111058	-0.105212
chr1	10515001	10520000	3.37498	9	-0.172647	-0.271726	-0.343135	-0.41348	-0.250249	0.0784215	0.0928189
chr1	10520001	10525000	3.37685	9	-0.209664	-0.157941	-0.258767	-0.342145	-0.423888	0.29046	0.0173517
chr1	10525001	10530000	3.37597	9	-0.297982	-0.363603	-0.504505	-0.345464	-0.287083	0.0987568	-0.0741312
chr1	10530001	10535000	3.36873	9	-0.227063	-0.151491	-0.374298	-0.358534	-0.165634	0.176099	0.0298069
chr1	10535001	10540000	3.36203	9	-0.328322	-0.355812	-0.443494	-0.238218	-0.137873	0.206831	0.128997
chr1	10540001	10545000	3.36275	9	-0.376997	-0.164988	-0.336612	-0.272645	-0.122704	0.040112	0.0326843
chr1	10545001	10550000	3.37779	9	-0.230974	-0.0735578	-0.18439	-0.470151	-0.267844	0.0478024	0.06646
chr1	10550001	10555000	3.41058	9	-0.262186	-0.27568	-0.380965	-0.30607	-0.175845	0.0907778	-0.0340169
chr1	10555001	10560000	3.45442	9	-0.223815	-0.280877	-0.470464	-0.249259	-0.188846	-0.0415107	-0.230158
chr1	10560001	10565000	3.50101	9	-0.0795572	-0.195969	-0.323628	-0.279968	-0.369468	0.0867685	-0.0919952
chr1	10565001	10570000	3.54202	9	0.017936	0.0680891	-0.0401472	-0.27077	-0.327771	0.0893918	0.0151216
chr1	10570001	10575000	3.57843	9	-0.0569514	-0.0408184	0.0817733	-0.307145	-0.18105	0.106327	-0.00422142
chr1	10580001	10585000	3.65648	9	0.0802334	0.0246123	0.126061	-0.285387	-0.296364	0.305043	-0.0377056
chr1	10590001	10595000	3.74068	9	-0.145387	-0.112019	-0.230466	-0.23478	-0.265524	0.0497365	0.0236509
chr1	10595001	10600000	3.78477	9	-0.371672	-0.348981	-0.455059	-0.138784	-0.0753473	0.0253428	-0.0234715
chr1	10600001	10605000	3.83	10	-0.387966	-0.388649	-0.408299	-0.379397	-0.076806	0.0123424	-0.0573121
chr1	10605001	10610000	3.87765	10	-0.189871	-0.187276	-0.24677	-0.43521	-0.23852	-0.0851535	-0.132268
chr1	10610001	10615000	3.92866	10	-0.419665	-0.338098	-0.389709	-0.213321	-0.144275	-0.00389916	-0.158387
chr1	10615001	10620000	3.98243	10	-0.564214	-0.615193	-0.751647	-0.159991	-0.104766	0.137167	-0.149861
chr1	10620001	10625000	4.03838	10	-0.5361	-0.593933	-0.750371	-0.236254	-0.0894883	-0.0615857	-0.0317864
chr1	10625001	10630000	4.10721	10	-0.604045	-0.82389	-0.855793	-0.357522	-0.138886	-0.0216185	-0.283928
chr1	10630001	10635000	4.19456	10	-0.658322	-0.850562	-0.95017	-0.454027	-0.153673	-0.192375	-0.224303
chr1	10635001	10640000	4.29228	10	-0.503379	-0.77538	-0.6904	-0.242278	-0.108011	-0.243222	-0.220525
chr1	10640001	10645000	4.39222	10	-0.790459	-0.868002	-1.11708	-0.273353	-0.127296	-0.379825	-0.236325
chr1	10655001	10660000	4.62383	10	-0.772914	-0.904054	-1.04313	-0.183857	-0.214282	-0.263427	-0.479626
chr1	10660001	10665000	4.66973	10	-0.488196	-0.452567	-0.666689	-0.286884	-0.0523459	-0.211545	-0.480601
chr1	10665001	10670000	4.71724	10	-0.829826	-0.906878	-1.05852	-0.229788	-0.0859144	-0.168522	-0.198498
chr1	10675001	10680000	4.80194	10	-0.622467	-0.981306	-0.918436	-0.184806	-0.0415066	-0.20673	-0.403762
chr1	10680001	10685000	4.83156	10	-0.837775	-0.918355	-0.987319	-0.206919	-0.162969	-0.131986	-0.293511
chr1	10685001	10690000	4.84883	10	-0.829061	-1.00235	-1.00484	-0.16873	-0.019003	-0.0137903	-0.154308
chr1	10690001	10695000	4.85539	10	-0.618418	-0.885578	-0.983981	-0.0807358	-0.00487903	0.0505248	-0.334785
chr1	10700001	10705000	4.84666	10	-0.68468	-0.702383	-0.91382	-0.0420243	-0.0109255	-0.114551	-0.134814
chr1	10715001	10720000	4.81752	10	-0.732971	-0.753056	-0.870079	-0.0719564	-0.0168595	-0.179491	-0.216552
chr1	10725001	10730000	4.81742	10	-0.5942	-0.812786	-0.818181	0.0142538	0.00581038	-0.00718695	-0.114365
chr1	10730001	10735000	4.82661	10	-0.399625	-0.510673	-0.544271	-0.0752308	-0.0225251	0.0976957	0.0478757
chr1	10740001	10745000	4.84591	10	-0.536228	-0.633286	-0.762486	0.124457	0.0483764	-0.11662	0.0243312
chr1	10745001	10750000	4.85236	10	-0.674839	-0.799977	-0.728839	0.135737	-0.00406471	0.127308	0.0907358
chr1	10750001	10755000	4.85422	10	-0.566977	-0.726679	-0.767659	0.198146	-0.0835566	0.210969	0.104907
chr1	10755001	10760000	4.84858	10	-0.623377	-0.84202	-0.902906	0.124171	-0.145424	0.0797923	0.132402
chr1	10760001	10765000	4.83537	10	-0.518706	-0.819256	-0.795487	0.249416	-0.000222564	0.122588	0.293984
chr1	10775001	10780000	4.77462	10	-0.472783	-0.514966	-0.688395	0.143901	-0.0340614	0.282009	0.132692
chr1	10780001	10785000	4.75544	10	-0.543145	-0.598356	-0.783356	0.335238	-0.0096872	0.37483	0.240589
chr1	10785001	10790000	4.74085	10	-0.627567	-0.599631	-0.826218	0.517944	0.0521281	0.302257	0.305585
chr1	10795001	10800000	4.70895	10	-0.681382	-0.555079	-0.756282	0.439815	-0.0332379	0.396802	0.301261
chr1	10800001	10805000	4.68969	10	-0.431443	-0.391248	-0.584717	0.292809	-0.0841719	0.621272	0.50423
chr1	10805001	10810000	4.67121	10	-0.45322	-0.502444	-0.602968	0.429811	0.0280583	0.633679	0.572196
chr1	10810001	10815000	4.65575	10	-0.44084	-0.584798	-0.611668	0.478424	0.0290747	0.569481	0.622301
chr1	10820001	10825000	4.64514	10	-0.49528	-0.74366	-0.938098	0.401031	0.0461944	0.628775	0.502862
chr1	10830001	10835000	4.65056	10	-0.686089	-0.663378	-0.911172	0.486486	0.0842818	0.610199	0.430878
chr1	10835001	10840000	4.65202	10	-0.643979	-0.753936	-0.833685	0.579106	0.0835757	0.579522	0.461154
chr1	10840001	10845000	4.64877	10	-0.385089	-0.431816	-0.505364	0.372603	0.0276422	0.578951	0.568849
chr1	10845001	10850000	4.6379	10	-0.49856	-0.395377	-0.579549	0.343764	-0.0878354	0.602154	0.581407
chr1	10850001	10855000	4.61786	10	-0.623496	-0.651307	-0.878926	0.547786	-0.000457032	0.723907	0.521548
chr1	10865001	10870000	4.52755	10	-0.625004	-0.761126	-0.792703	0.503347	-0.078332	0.554428	0.399066
chr1	10870001	10875000	4.49678	10	-0.447648	-0.567051	-0.677553	0.523395	0.0729653	0.59629	0.550479
chr1	10875001	10880000	4.47037	10	-0.462693	-0.495396	-0.723697	0.452343	0.0650606	0.601317	0.518613
chr1	10880001	10885000	4.44376	10	-0.243557	-0.36062	-0.410257	0.244226	-0.139108	0.559167	0.423081
chr1	10885001	10890000	4.41176	10	-0.290419	-0.449544	-0.329322	0.246307	-0.256991	0.602111	0.534948
chr1	10890001	10895000	4.3763	10	-0.442481	-0.55877	-0.657236	0.435389	-0.0823322	0.498419	0.372616
chr1	10910001	10915000	4.23772	10	-0.602484	-0.695626	-0.783477	0.416565	0.0493427	0.587995	0.515478
chr1	10915001	10920000	4.21341	10	-0.538367	-0.70704	-0.631384	0.392291	-0.0103121	0.486276	0.579941
chr1	10920001	10925000	4.19384	10	-0.142298	-0.283774	-0.269274	0.254081	-0.214419	0.642619	0.564417
chr1	10925001	10930000	4.17624	10	-0.227995	-0.203294	-0.24766	0.330518	-0.0546367	0.601327	0.535269
chr1	10945001	10950000	4.11926	10	-0.788647	-0.894795	-0.880958	0.342225	-0.0578904	0.425819	0.413746
chr1	10955001	10960000	4.09437	10	-0.66053	-0.644449	-0.730736	0.312417	0.0502775	0.533789	0.605788
chr1	10970001	10975000	4.06985	10	-0.459039	-0.688862	-0.814672	0.229876	-0.0633169	0.571034	0.510389
chr1	10975001	10980000	4.06542	10	-0.615535	-0.675758	-0.712977	0.284517	-0.0776631	0.542884	0.380357
chr1	10985001	10990000	4.05773	10	-0.485067	-0.548576	-0.759846	0.20903	-0.125512	0.416704	0.44602
chr1	10990001	10995000	4.05298	10	-0.390065	-0.42268	-0.641575	0.254774	-0.183342	0.439392	0.392257
chr1	10995001	11000000	4.04663	10	-0.31724	-0.4502	-0.444151	0.150932	-0.128487	0.612406	0.530104
chr1	11000001	11005000	4.03794	10	-0.362933	-0.417403	-0.415059	0.0841862	-0.26578	0.484479	0.588681
chr1	11005001	11010000	4.02617	10	-0.473774	-0.437804	-0.455931	0.397115	-0.200338	0.421085	0.493259
chr1	11010001	11015000	4.01056	10	-0.435297	-0.526343	-0.572878	0.220857	-0.199201	0.366535	0.26206
chr1	11015001	11020000	3.99019	10	-0.23577	-0.282712	-0.351338	0.177939	-0.113238	0.493201	0.486386
chr1	11020001	11025000	3.96637	10	-0.0787652	-0.0716804	-0.178907	-0.00824107	-0.116211	0.59178	0.560883
chr1	11025001	11030000	3.94178	10	-0.0585785	-0.0641843	-0.0403054	0.104252	-0.218468	0.607688	0.455703
chr1	11030001	11035000	3.91911	10	-0.258816	-0.41636	-0.473099	0.133861	-0.325558	0.401186	0.310627
chr1	11035001	11040000	3.90101	10	-0.440678	-0.401374	-0.626174	0.129282	-0.229281	0.40236	0.258567
chr1	11040001	11045000	3.88283	10	-0.645765	-0.481296	-0.997811	0.268613	-0.127216	0.441792	0.248741
chr1	11045001	11050000	3.8606	10	-0.616835	-0.762572	-0.939958	0.207623	-0.205746	0.221619	0.209912
chr1	11050001	11055000	3.8381	10	-0.652039	-0.695803	-0.747623	0.151436	-0.061762	0.273337	0.251061
chr1	11055001	11060000	3.81912	9	-0.664302	-0.83153	NA	0.152718	NA	0.168425	NA
chr1	11060001	11065000	3.79618	9	-0.522086	-0.662466	-0.765985	-0.0117128	-0.221068	0.292916	0.326801
chr1	11070001	11075000	3.72552	9	-0.606482	-0.389965	-0.584617	0.0928912	0.0390759	0.482281	0.53838
chr1	11075001	11080000	3.68909	9	-0.403112	-0.501597	-0.646875	0.10699	-0.0545994	0.375753	0.455645
chr1	11080001	11085000	3.65948	9	-0.206382	-0.308077	-0.463861	0.0762574	-0.094894	0.261638	0.334091
chr1	11085001	11090000	3.64232	9	-0.167998	-0.100749	-0.328273	-0.190734	-0.232785	0.207271	0.488265
chr1	11090001	11095000	3.62255	9	-0.346832	-0.198599	-0.325782	-0.00593235	-0.118788	0.428011	0.420505
chr1	11095001	11100000	3.58775	9	-0.297453	-0.408689	-0.468551	0.119963	-0.0663956	0.330716	0.212788
chr1	11100001	11105000	3.54751	9	-0.377197	-0.456259	-0.442649	-0.099858	-0.0792596	0.255472	0.313729
chr1	11115001	11120000	3.49009	9	-0.268739	-0.151533	-0.471387	-0.0300922	-0.0502138	0.334715	0.354467
chr1	11120001	11125000	3.52513	9	-0.327356	-0.301056	-0.521504	0.00377109	0.00722616	0.194693	0.310941
chr1	11130001	11135000	3.67671	9	-0.244527	-0.227497	-0.325475	-0.0814841	0.00599448	0.299624	0.474617
chr1	11135001	11140000	3.77098	9	-0.266752	-0.299992	-0.405892	-0.236544	-0.0621701	0.399876	0.373766
chr1	11145001	11150000	3.94075	10	-0.217873	-0.147053	-0.175375	-0.142653	0.040317	0.30343	0.471994
chr1	11150001	11155000	3.99397	10	-0.125078	-0.106235	-0.191514	-0.0705128	0.0482814	0.255071	0.462741
chr1	11155001	11160000	4.04661	10	-0.216681	-0.135929	-0.281609	-0.224002	-0.0261585	0.208275	0.393281
chr1	11160001	11165000	4.11647	10	-0.244136	-0.375825	-0.458023	-0.183837	-0.17077	0.0743228	0.27335
chr1	11165001	11170000	4.18275	10	-0.193108	-0.256579	-0.29609	-0.268024	-0.0597556	0.206231	0.23942
chr1	11170001	11175000	4.22466	10	-0.348159	-0.408468	-0.376525	-0.228309	0.0831716	0.340452	0.201349
chr1	11175001	11180000	4.24525	10	-0.388879	-0.431802	-0.547893	-0.063978	0.131412	0.358787	0.420308
chr1	11185001	11190000	4.27344	10	-0.20769	-0.245228	-0.255172	-0.189451	-0.0176179	0.238474	0.33683
chr1	11190001	11195000	4.28118	10	-0.485328	-0.399478	-0.492276	-0.0844778	0.0395091	0.173149	0.353075
chr1	11195001	11200000	4.28477	10	-0.238229	-0.310284	-0.122667	-0.157614	-0.0695281	0.116226	0.25937
chr1	11200001	11205000	4.28427	10	-0.0165291	-0.200529	-0.0532492	-0.16934	-0.0766348	0.258205	0.284545
chr1	11205001	11210000	4.27699	10	-0.272243	-0.204072	-0.337338	-0.126054	0.00740009	0.210693	0.43469
chr1	11210001	11215000	4.26299	10	-0.320542	-0.193413	-0.249246	-0.188963	-0.00754161	0.293148	0.38569
chr1	11215001	11220000	4.24649	10	-0.105434	-0.0545583	-0.179954	-0.0722028	-0.0849783	0.28298	0.435283
chr1	11220001	11225000	4.23172	10	0.117134	0.20436	0.124418	-0.118418	-0.196831	0.400844	0.343208
chr1	11225001	11230000	4.20178	10	-0.0191909	-0.119525	-0.11212	-0.0585891	-0.102604	0.252729	0.25931
chr1	11230001	11235000	4.14716	10	-0.324207	-0.436183	-0.253488	0.00827382	0.0118159	0.218589	0.248333
chr1	11235001	11240000	4.08309	10	-0.407792	-0.409364	-0.520329	0.130355	-0.0604247	0.210481	0.334017
chr1	11240001	11245000	4.02484	10	-0.24433	-0.29406	-0.391142	0.0120718	0.0199001	0.198999	0.230341
chr1	11245001	11250000	3.98764	10	-0.291189	-0.466052	-0.405148	0.0556805	0.0700312	0.299647	0.297925
chr1	11250001	11255000	3.93964	10	-0.290507	-0.236081	-0.469449	0.241706	0.168958	0.281409	0.36262
chr1	11255001	11260000	3.86025	10	-0.362499	-0.292795	-0.467085	0.223195	0.103699	0.221771	0.388819
chr1	11260001	11265000	3.78171	9	-0.294145	-0.232898	-0.467982	0.155128	-0.0809712	0.115025	0.0453183
chr1	11265001	11270000	3.73623	9	-0.295817	-0.230544	-0.430408	0.109465	-0.155041	0.158409	0.107691
chr1	11270001	11275000	3.7336	9	-0.359676	-0.358475	-0.542309	0.153549	-0.139418	0.0918827	0.0489895
chr1	11275001	11280000	3.7561	9	-0.322745	-0.377765	-0.405305	0.166318	-0.0733824	0.0976346	0.312691
chr1	11285001	11290000	3.84011	10	-0.409714	-0.429895	-0.48718	0.19372	0.0596367	0.0843951	0.302494
chr1	11295001	11300000	3.91552	10	-0.571986	-0.463232	-0.662886	0.262009	0.0178443	0.312043	0.407268
chr1	11300001	11305000	3.92727	10	-0.601171	-0.549805	-0.702484	0.273102	0.0909377	0.343789	0.358257
chr1	11305001	11310000	3.93521	10	-0.532583	-0.586644	-0.621164	0.347583	0.185397	0.261066	0.358831
chr1	11310001	11315000	3.95551	10	-0.51914	-0.662034	-0.70322	0.297572	0.165924	0.192623	0.398998
chr1	11320001	11325000	3.99492	10	-0.50986	-0.686434	-0.755227	0.202121	0.0914141	0.370174	0.243721
chr1	11325001	11330000	3.99491	10	-0.622695	-0.647763	-0.776365	0.390834	0.267388	0.307502	0.310306
chr1	11330001	11335000	3.97236	10	-0.510989	-0.64277	-0.784929	0.353276	0.127124	0.234006	0.261135
chr1	11335001	11340000	3.93409	10	0.0409676	-0.131478	-0.0915907	0.392944	0.2366	0.394208	0.148304
chr1	11340001	11345000	3.89007	10	-0.537877	-0.606316	-0.610904	0.376417	0.190078	0.327673	0.207084
chr1	11345001	11350000	3.85024	10	-0.599727	-0.479841	-0.624454	0.30972	0.255906	0.207943	0.339068
chr1	11350001	11355000	3.82456	10	-0.507496	-0.56549	-0.658984	0.474727	0.190448	0.114903	0.331387
chr1	11355001	11360000	3.79531	9	-0.479552	-0.475266	-0.585302	0.422052	0.122197	0.164311	0.264437
chr1	11360001	11365000	3.74915	9	-0.534659	-0.655227	-0.670379	0.452644	0.184902	-0.0320522	0.272516
chr1	11365001	11370000	3.70261	9	-0.432924	-0.435052	-0.514764	0.31159	0.207052	0.136114	0.27753
chr1	11370001	11375000	3.67223	9	-0.445258	-0.457066	-0.663379	0.297548	0.190244	0.16134	0.0530677
chr1	11375001	11380000	3.65718	9	-0.523529	-0.661493	-0.619643	0.312512	0.142424	0.1333	0.20621
chr1	11380001	11385000	3.64525	9	-0.322666	-0.534523	-0.497384	0.215517	0.234204	0.0798631	0.282548
chr1	11385001	11390000	3.63589	9	-0.600706	-0.611196	-0.8687	0.347346	0.165387	0.0610283	0.289096
chr1	11390001	11395000	3.62853	9	-0.401796	-0.279867	-0.650936	0.345361	0.308109	0.133242	0.356099
chr1	11395001	11400000	3.62263	9	-0.548873	-0.647973	-0.719764	0.506951	0.303438	0.159939	0.147231
chr1	11400001	11405000	3.61763	9	-0.31496	-0.390408	-0.454406	0.319678	0.260386	0.143062	0.152006
chr1	11405001	11410000	3.61298	9	-0.41835	-0.246864	-0.423056	0.246726	0.248939	0.269121	0.298953
chr1	11410001	11415000	3.60813	9	-0.455631	-0.452411	-0.359982	0.317201	0.294976	0.136008	0.22062
chr1	11415001	11420000	3.6131	9	-0.614091	-0.413432	-0.602071	0.419078	0.260988	0.132248	0.187315
chr1	11420001	11425000	3.63232	9	-0.339179	-0.182093	-0.32424	0.301829	0.272103	0.285102	0.32443
chr1	11425001	11430000	3.65685	9	-0.559617	-0.455835	-0.505433	0.367221	0.530832	0.162183	0.200072
chr1	11430001	11435000	3.67775	9	-0.581017	-0.686144	-0.784557	0.545213	0.480623	-0.00409609	0.104014
chr1	11435001	11440000	3.68606	9	-0.580462	-0.711127	-0.602526	0.437643	0.460439	0.0860916	0.209818
chr1	11440001	11445000	3.68313	9	-0.589183	-0.761944	-0.869084	0.585102	0.455084	0.0685913	0.0624366
chr1	11445001	11450000	3.67765	9	-0.520062	-0.704134	-0.803143	0.495504	0.457513	0.0664388	0.197558
chr1	11450001	11455000	3.67178	9	-0.70994	-0.754932	-0.753119	0.47764	0.42793	0.138946	0.219695
chr1	11455001	11460000	3.66765	9	-0.656675	-0.678047	-0.728506	0.503786	0.475055	0.0493642	0.21902
chr1	11460001	11465000	3.65377	9	-0.456278	-0.576341	-0.669082	0.574369	0.43664	0.0420288	0.269086
chr1	11465001	11470000	3.62452	9	-0.511447	-0.458536	-0.580244	0.412498	0.252531	0.188396	0.156537
chr1	11470001	11475000	3.59082	9	-0.403509	-0.44871	-0.535485	0.445443	0.296158	0.233143	0.225621
chr1	11475001	11480000	3.56357	9	-0.393596	-0.658581	-0.705546	0.396538	0.36691	0.0792377	0.115437
chr1	11480001	11485000	3.55372	9	-0.425979	-0.692747	-0.787273	0.476115	0.322898	0.0505133	0.00202133
chr1	11485001	11490000	3.545	9	-0.575232	-0.694433	-0.818008	0.43381	0.324554	-0.0299571	0.279779
chr1	11490001	11495000	3.52429	9	-0.513344	-0.50082	-0.662262	0.28328	0.284527	-0.0197885	0.135499
chr1	11495001	11500000	3.50715	9	-0.532679	-0.516409	-0.748481	0.319751	0.380247	0.144715	0.186233
chr1	11500001	11505000	3.50914	9	-0.449076	-0.495155	-0.643344	0.295943	0.333127	-0.0122002	0.237868
chr1	11505001	11510000	3.5285	9	0.0581311	0.0865948	0.0696488	-0.014375	0.128143	0.0965383	0.294973
chr1	11510001	11515000	3.55306	9	-0.0899354	-0.237944	-0.280597	0.204199	0.216143	0.0253961	0.240748
chr1	11515001	11520000	3.58278	9	-0.659733	-0.723352	-0.781215	0.442727	0.280692	-0.127666	0.0336483
chr1	11520001	11525000	3.61766	9	-0.716822	-0.845071	-0.914804	0.468356	0.345556	-0.0469211	-0.181046
chr1	11525001	11530000	3.65765	9	-0.713934	-0.770698	-0.924223	0.455177	0.316807	0.0786622	0.0729071
chr1	11530001	11535000	3.71955	9	-0.716742	-0.838369	-0.942473	0.549924	0.366408	0.0171646	0.105903
chr1	11535001	11540000	3.8089	9	-0.754726	-0.833156	-0.951784	0.487409	0.390458	0.117699	0.257538
chr1	11545001	11550000	4.00245	10	-0.432025	-0.496904	-0.528935	0.322799	0.181446	0.215491	0.277607
chr1	11550001	11555000	4.0729	10	-0.36496	-0.469195	-0.388218	0.26301	0.200041	0.273411	0.39543
chr1	11560001	11565000	4.19804	10	-0.508298	-0.532955	-0.785964	0.395646	0.326054	0.146277	0.173851
chr1	11565001	11570000	4.26931	10	-0.585454	-0.499007	-0.677813	0.482127	0.311767	0.192857	0.367285
chr1	11570001	11575000	4.34168	10	-0.50132	-0.398774	-0.489537	0.424296	0.217928	0.139901	0.367368
chr1	11580001	11585000	4.47561	10	-0.262267	-0.266192	-0.394071	0.249325	0.172995	0.356553	0.475479
chr1	11590001	11595000	4.5716	10	-0.413395	-0.491167	-0.423895	0.332593	0.124763	0.251632	0.426472
chr1	11595001	11600000	4.61003	10	-0.661183	-0.635315	-0.70014	0.462152	0.18038	0.422015	0.402345
chr1	11600001	11605000	4.65334	10	-0.523805	-0.565927	-0.672932	0.522869	0.260928	0.373495	0.384175
chr1	11605001	11610000	4.69501	10	-0.486717	-0.58833	-0.645263	0.467647	0.138489	0.389871	0.465279
chr1	11615001	11620000	4.74735	10	-0.52641	-0.622982	-0.784485	0.49213	0.134698	0.295752	0.416646
chr1	11620001	11625000	4.74775	10	-0.518569	-0.428652	-0.6935	0.226977	0.136869	0.3703	0.496143
chr1	11625001	11630000	4.73378	10	-0.434677	-0.484743	-0.513668	0.380922	0.144002	0.28196	0.265831
chr1	11630001	11635000	4.71064	10	-0.492638	-0.648567	-0.803352	0.258462	0.0491158	0.318923	0.281341
chr1	11635001	11640000	4.68352	10	-0.490846	-0.636933	-0.809498	0.345496	0.0896646	0.270851	0.335788
chr1	11645001	11650000	4.63811	10	-0.631441	-0.652315	-0.788664	0.354319	0.0959651	0.427351	0.332377
chr1	11650001	11655000	4.60291	10	-0.613552	-0.958544	-0.951102	0.365259	-0.02225	0.246634	0.0503331
chr1	11655001	11660000	4.54245	10	-0.608552	-0.631236	-0.777783	0.379245	0.0874184	0.17062	0.236321
chr1	11660001	11665000	4.48075	10	-0.666914	-0.760596	-0.682875	0.422566	-0.108245	0.172376	0.0695687
chr1	11665001	11670000	4.44181	10	-0.597955	-0.656665	-0.600879	0.279457	-0.182207	0.280611	0.166645
chr1	11670001	11675000	4.4144	10	-0.679224	-0.85461	-0.736021	0.319485	-0.0696985	0.442371	0.259161
chr1	11675001	11680000	4.37562	10	-0.51346	-0.764039	-0.847777	0.24376	-0.163836	0.367287	0.315655
chr1	11680001	11685000	4.332	10	-0.403195	-0.653134	-0.640219	0.258024	-0.239016	0.350916	0.276899
chr1	11690001	11695000	4.25648	10	-0.60078	-0.820915	-0.813086	0.168459	-0.214005	0.21926	-0.012738
chr1	11695001	11700000	4.23767	10	-0.492866	-0.575854	-0.670162	0.169775	-0.211386	0.496441	0.331723
chr1	11700001	11705000	4.22908	10	-0.453036	-0.519334	-0.62155	0.174757	-0.0519839	0.451416	0.282179
chr1	11705001	11710000	4.22202	10	-0.57545	-0.743372	-0.862746	0.163512	-0.0462757	0.458967	0.370851
chr1	11710001	11715000	4.21688	10	-0.592338	-0.649157	-0.726431	0.176838	-0.0946802	0.474651	0.370475
chr1	11715001	11720000	4.21406	10	-0.39429	-0.558907	-0.604309	0.117902	-0.129871	0.552061	0.410615
chr1	11720001	11725000	4.21477	10	-0.57303	-0.550231	-0.684389	0.144059	-0.117223	0.437671	0.557713
chr1	11725001	11730000	4.21947	10	-0.407081	-0.520416	-0.631681	0.302758	-0.169837	0.564527	0.468232
chr1	11730001	11735000	4.22733	10	-0.601987	-0.575187	-0.560818	0.276345	-0.0954732	0.603503	0.332701
chr1	11740001	11745000	4.2494	10	-0.629413	-0.732539	-0.916685	0.108315	-0.210504	0.690243	0.593004
chr1	11750001	11755000	4.27459	10	-0.686218	-0.629476	-0.94059	0.365574	-0.19618	0.560928	0.554559
chr1	11755001	11760000	4.29972	10	-0.340864	-0.441304	-0.579315	0.14311	-0.291848	0.614501	0.541503
chr1	11760001	11765000	4.34412	10	-0.708837	-0.737914	-0.868058	0.212211	-0.19414	0.477793	0.314553
chr1	11775001	11780000	4.49746	10	-0.721234	-0.868754	-0.83263	0.351316	-0.210767	0.587515	0.48714
chr1	11780001	11785000	4.52347	10	-0.6101	-0.722662	-0.829781	0.29034	-0.2462	0.431476	0.446665
chr1	11795001	11800000	4.5534	10	-0.507121	-0.591564	-0.644417	0.326263	-0.188574	0.675767	0.533827
chr1	11805001	11810000	4.56094	10	-0.307414	-0.350353	-0.433975	0.197784	-0.21057	0.416046	0.395668
chr1	11810001	11815000	4.56058	10	-0.274263	-0.296774	-0.319422	0.205429	-0.248263	0.617156	0.629313
chr1	11815001	11820000	4.55729	10	-0.138284	-0.258843	-0.175663	0.191493	-0.168135	0.818769	0.674182
chr1	11820001	11825000	4.55093	10	-0.268711	-0.489586	-0.396239	0.252105	-0.118504	0.732484	0.584734
chr1	11835001	11840000	4.51206	10	-0.470917	-0.569636	-0.771205	0.326723	-0.129105	0.732978	0.639606
chr1	11840001	11845000	4.49206	10	-0.566323	-0.549382	-0.631449	0.333642	-0.00947253	0.759341	0.693287
chr1	11845001	11850000	4.46831	10	-0.605404	-0.583835	-0.741214	0.234257	-0.119811	0.66112	0.579992
chr1	11855001	11860000	4.38827	10	-0.462918	-0.484863	-0.725842	0.176106	-0.239956	0.757985	0.596173
chr1	11865001	11870000	4.26977	10	-0.538751	-0.562848	-0.66412	0.104521	-0.243494	0.79755	0.578803
chr1	11870001	11875000	4.20498	10	-0.419137	-0.501944	-0.639305	0.112371	-0.119632	0.624559	0.558102
chr1	11890001	11895000	3.99171	10	-0.496565	-0.470663	-0.576617	0.320793	-0.293758	0.609286	0.496525
chr1	11895001	11900000	3.96763	10	-0.475126	-0.444739	-0.541719	0.307423	-0.209943	0.455424	0.267407
chr1	11900001	11905000	3.95364	10	-0.546033	-0.437414	-0.669573	0.156511	-0.264992	0.518987	0.161874
chr1	11905001	11910000	3.94193	10	-0.500431	-0.411473	-0.618491	0.0816927	-0.329575	0.274449	0.0445455
chr1	11910001	11915000	3.93207	10	-0.407553	-0.546151	-0.461953	0.0819999	-0.300764	0.250963	0.320527
chr1	11920001	11925000	3.91618	10	-0.715257	-0.631556	-0.860022	0.133459	-0.200608	0.356772	0.164764
chr1	11925001	11930000	3.91281	10	-0.497372	-0.558505	-0.635795	0.0382418	-0.42963	0.283518	-0.0658281
chr1	11940001	11945000	3.93922	10	-0.462055	-0.611846	-0.819412	0.217041	-0.236723	0.229909	0.09736
chr1	11945001	11950000	3.95678	10	-0.448774	-0.670057	-0.758548	0.151715	-0.0623515	0.295574	0.308806
chr1	11950001	11955000	3.97699	10	-0.479342	-0.68263	-0.633639	0.198336	-0.112074	0.416493	0.453725
chr1	11980001	11985000	4.09661	10	-0.629048	-0.57311	-0.700381	0.17499	-0.199774	0.345198	0.378797
chr1	11985001	11990000	4.11315	10	-0.659161	-0.596651	-0.674641	0.199625	-0.241716	0.539527	0.551783
chr1	11990001	11995000	4.13497	10	-0.407999	-0.400073	-0.57278	0.14853	-0.0848027	0.588201	0.598903
chr1	11995001	12000000	4.15796	10	-0.362696	-0.511449	-0.743124	-0.103639	0.0361638	0.55856	0.460807
chr1	12000001	12005000	4.17796	10	-0.394805	-0.563954	-0.591962	0.123731	-0.0107782	0.408258	0.562934
chr1	12005001	12010000	4.19518	10	-0.572199	-0.737503	-0.836958	0.310445	0.0069499	0.299057	0.478224
chr1	12010001	12015000	4.21251	10	-0.331589	-0.573331	-0.630596	0.238328	0.0999399	0.495961	0.43879
chr1	12015001	12020000	4.22986	10	-0.437695	-0.612866	-0.4603	0.0975684	-0.179657	0.328557	0.349283
chr1	12020001	12025000	4.24713	10	-0.598331	-0.683377	-0.712195	0.15277	-0.140529	0.386478	0.298767
chr1	12035001	12040000	4.29758	10	-0.545483	-0.621122	-0.56078	0.169631	-0.0570374	0.533648	0.455898
chr1	12045001	12050000	4.31394	10	-0.565992	-0.578012	-0.746295	0.260436	-0.150708	0.486572	0.453352
chr1	12050001	12055000	4.31454	10	-0.558959	-0.561501	-0.86655	0.376947	0.0384064	0.485992	0.473342
chr1	12060001	12065000	4.31594	10	-0.439312	-0.435616	-0.507236	0.191072	-0.0940797	0.608274	0.515385
chr1	12065001	12070000	4.3229	10	-0.510861	-0.562056	-0.624201	0.248327	-0.0908168	0.521939	0.489892
chr1	12070001	12075000	4.3382	10	-0.605621	-0.710071	-0.822481	0.218432	0.0680485	0.587659	0.416846
chr1	12085001	12090000	4.41583	10	-0.384906	-0.596831	-0.706218	0.404384	-0.0127717	0.633529	0.492685
chr1	12090001	12095000	4.44181	10	-0.259693	-0.492222	-0.5529	0.41544	-0.143857	0.719076	0.502156
chr1	12095001	12100000	4.4626	10	0.0165185	-0.155852	-0.113402	0.172761	-0.128323	0.713976	0.510116
chr1	12100001	12105000	4.47508	10	-0.389403	-0.436776	-0.438006	0.383237	0.0413431	0.711359	0.443591
chr1	12105001	12110000	4.48888	10	-0.345367	-0.557011	-0.627065	0.438525	-0.0180277	0.53795	0.526061
chr1	12110001	12115000	4.51244	10	-0.582709	-0.628499	-0.737702	0.274592	-0.0651008	0.507311	0.42598
chr1	12125001	12130000	4.59217	10	-0.570552	-0.677493	-0.772414	0.541369	-0.0307589	0.547235	0.390877
chr1	12130001	12135000	4.60525	10	-0.513066	-0.577973	-0.590941	0.375976	-0.0976624	0.639589	0.459507
chr1	12135001	12140000	4.60378	10	-0.499337	-0.606239	-0.631521	0.463815	-0.0288696	0.551028	0.438792
chr1	12145001	12150000	4.56413	10	-0.582987	-0.705555	-0.684883	0.634867	-0.13553	0.546712	0.349526
chr1	12165001	12170000	4.43541	10	-0.539545	-0.646761	-0.831865	0.708379	-0.131404	0.638256	0.335663
chr1	12170001	12175000	4.41324	10	-0.594957	-0.674725	-0.775709	0.547037	-0.0136113	0.589248	0.338009
chr1	12175001	12180000	4.40204	10	-0.728948	-0.818061	-0.7518	0.589743	-0.0711972	0.628061	0.194488
chr1	12190001	12195000	4.39081	10	-0.79217	-0.687943	-0.766092	0.576487	-0.0377383	0.685138	0.424989
chr1	12195001	12200000	4.38813	10	-0.551647	-0.66006	-0.664679	0.490469	-0.0711343	0.558775	0.445016
chr1	12200001	12205000	4.38596	10	-0.709922	-0.75853	-0.851765	0.542259	-0.041395	0.567173	0.416302
chr1	12205001	12210000	4.38428	10	-0.630749	-0.828656	-0.871018	0.562103	0.0176928	0.402775	0.293788
chr1	12210001	12215000	4.38845	10	-0.478926	-0.633092	-0.676337	0.532968	-0.0507637	0.502077	0.514855
chr1	12215001	12220000	4.40079	10	-0.388933	-0.532562	-0.570056	0.47384	0.094892	0.544167	0.502589
chr1	12220001	12225000	4.41676	10	-0.219551	-0.455428	-0.464854	0.492921	-0.0988999	0.567936	0.512537
chr1	12225001	12230000	4.43182	10	-0.372498	-0.456774	-0.516105	0.635895	-0.115524	0.423057	0.366852
chr1	12230001	12235000	4.44144	10	-0.425646	-0.431506	-0.400302	0.436627	0.0884982	0.359346	0.35343
chr1	12235001	12240000	4.45676	10	-0.125582	-0.211122	-0.166577	0.56806	0.150488	0.413044	0.434497
chr1	12245001	12250000	4.51964	10	-0.165953	-0.176454	-0.125835	0.237855	0.0462933	0.327572	0.476823
chr1	12250001	12255000	4.54895	10	-0.0874258	-0.209343	-0.14576	0.178619	-0.0548603	0.426619	0.54285
chr1	12255001	12260000	4.56468	10	-0.336447	-0.164323	-0.237087	0.117765	0.0712383	0.231904	0.49556
chr1	12260001	12265000	4.57799	10	-0.225616	-0.214727	-0.319186	0.122642	0.00711705	0.17749	0.57785
chr1	12265001	12270000	4.60146	10	-0.206457	-0.0589991	-0.0452496	0.058021	-0.0658067	0.217328	0.695058
chr1	12270001	12275000	4.62802	10	-0.209136	-0.0829302	-0.0593813	0.102463	0.0254304	0.0572627	0.421821
chr1	12275001	12280000	4.65062	10	-0.14082	-0.14913	-0.104878	-0.0612171	0.0168897	0.199859	0.4598
chr1	12285001	12290000	4.65578	10	-0.340714	-0.270128	-0.33061	-0.0731168	-0.0360635	0.254535	0.403944
chr1	12290001	12295000	4.63028	10	-0.204621	-0.222989	-0.132837	-0.0718757	-0.166406	0.179315	0.392206
chr1	12295001	12300000	4.59321	10	0.0803	0.115859	0.18539	-0.125408	-0.0403235	0.242227	0.428382
chr1	12300001	12305000	4.55025	10	-0.0171563	-0.0511572	-0.0142758	-0.21576	0.0789254	0.152617	0.442381
chr1	12305001	12310000	4.50706	10	-0.379496	-0.17209	-0.405088	-0.146072	0.173825	-0.0213807	0.280155
chr1	12310001	12315000	4.45174	10	-0.271668	-0.24282	-0.303963	-0.27622	0.158619	0.0330518	0.35854
chr1	12315001	12320000	4.37618	10	-0.0657129	-0.228689	-0.0902666	-0.214125	-0.0463526	0.0486218	0.387327
chr1	12320001	12325000	4.29169	10	-0.133603	-0.269567	-0.100296	-0.247212	-0.0603834	0.145462	0.306842
chr1	12325001	12330000	4.20959	10	-0.299363	-0.234796	-0.22593	-0.229961	-0.0729825	0.196121	0.281404
chr1	12330001	12335000	4.14121	10	-0.131097	-0.10691	-0.0965361	-0.292641	-0.0560386	0.137212	0.37142
chr1	12335001	12340000	4.06668	10	-0.133196	-0.117589	-0.182219	-0.296091	-0.123205	0.322192	0.423724
chr1	12340001	12345000	3.97246	10	-0.204772	-0.191251	-0.219876	-0.201336	-0.16835	0.227742	0.39698
chr1	12345001	12350000	3.87946	10	-0.00945171	0.0112913	0.0657301	-0.35667	-0.113007	0.31061	0.539093
chr1	12350001	12355000	3.80856	9	0.16922	0.0432933	0.00866907	-0.302551	-0.150889	0.176394	0.462352
chr1	12355001	12360000	3.74846	9	-0.133964	-0.104054	-0.0519854	-0.332947	0.000780995	0.134175	0.465308
chr1	12360001	12365000	3.6779	9	0.0462479	-0.0550715	-0.139629	-0.279742	-0.0757543	0.27935	0.388711
chr1	12370001	12375000	3.52896	9	-0.152473	-0.00924309	-0.150745	-0.302925	-0.130412	0.14022	0.168039
chr1	12380001	12385000	3.4089	9	-0.156958	0.0098857	-0.166463	-0.372232	-0.0464479	0.391193	0.402008
chr1	12385001	12390000	3.37444	9	0.00583913	-0.0214446	0.0353401	-0.353588	-0.00496521	0.331519	0.418788
chr1	12390001	12395000	3.3511	9	-0.188157	-0.399787	-0.333668	-0.041347	-0.00148085	0.265582	0.46793
chr1	12395001	12400000	3.32934	9	-0.324953	-0.357263	-0.327821	0.00399543	0.082255	0.31831	0.303331
chr1	12400001	12405000	3.31259	9	-0.259087	-0.250437	-0.193503	-0.0976442	0.0663673	0.361491	0.47198
chr1	12405001	12410000	3.30428	9	-0.00235273	-0.136062	-0.150643	-0.297291	0.0607191	0.276155	0.414004
chr1	12415001	12420000	3.34835	9	0.00523369	-0.154104	-0.231106	-0.41389	0.0401613	0.500629	0.489321
chr1	12420001	12425000	3.39782	9	0.0797658	-0.094466	-0.0624944	-0.206018	0.0316431	0.400627	0.527725
chr1	12435001	12440000	3.57572	9	-0.43457	-0.244573	-0.363632	-0.194754	0.171207	0.419922	0.523987
chr1	12440001	12445000	3.62254	9	-0.114486	-0.066698	-0.251804	-0.204352	-0.13411	0.439283	0.381477
chr1	12445001	12450000	3.65196	9	-0.235763	-0.322035	-0.298148	-0.20345	0.0359807	0.421071	0.507167
chr1	12450001	12455000	3.67662	9	-0.238906	-0.26803	-0.325482	-0.208517	-0.0914406	0.566389	0.58714
chr1	12455001	12460000	3.70843	9	-0.0824215	-0.318095	-0.304939	-0.103106	-0.118586	0.462372	0.479259
chr1	12460001	12465000	3.73965	9	-0.378546	-0.39064	-0.269941	-0.0769374	0.138751	0.435579	0.508727
chr1	12465001	12470000	3.76254	9	-0.156863	-0.0971154	-0.0817929	-0.0942283	0.0333257	0.464724	0.508305
chr1	12470001	12475000	3.77357	9	-0.0944099	-0.124742	-0.149453	-0.108608	0.0529982	0.542724	0.524074
chr1	12475001	12480000	3.77679	9	-0.422607	-0.467368	-0.446443	-0.011265	0.168399	0.476564	0.407388
chr1	12480001	12485000	3.77583	9	-0.326952	-0.291356	-0.309086	0.115581	0.151716	0.598015	0.407492
chr1	12485001	12490000	3.77428	9	-0.160509	-0.339617	-0.338819	0.023028	-0.0193994	0.46861	0.3961
chr1	12495001	12500000	3.78387	9	-0.272319	-0.386761	-0.39064	0.0903799	-0.00904589	0.527963	0.653289
chr1	12510001	12515000	3.79609	9	-0.417045	-0.424599	-0.561626	0.0903933	0.0438912	0.35945	0.554377
chr1	12515001	12520000	3.7958	9	-0.493328	-0.219573	-0.454288	0.068614	-0.176631	0.42897	0.337764
chr1	12520001	12525000	3.79774	9	-0.33121	-0.367623	-0.441981	-0.0246921	-0.291261	0.363046	0.318384
chr1	12525001	12530000	3.80456	9	-0.520536	-0.552692	-0.548813	0.109603	-0.268713	0.298047	0.329084
chr1	12530001	12535000	3.8172	9	-0.199723	-0.251549	-0.315988	-0.0342301	-0.0859182	0.321406	0.343627
chr1	12535001	12540000	3.8331	10	-0.167322	-0.314831	-0.526093	0.0798788	-0.107144	0.351343	0.24594
chr1	12540001	12545000	3.84973	10	-0.375696	-0.497101	-0.562369	0.0517005	-0.0549072	0.330167	0.27725
chr1	12545001	12550000	3.86455	10	-0.55534	-0.67893	-0.686163	0.0965899	-0.206832	0.289232	0.219278
chr1	12550001	12555000	3.87502	10	-0.756944	-0.728475	-0.736604	0.029277	-0.113722	0.269461	0.142491
chr1	12555001	12560000	3.88942	10	-0.556681	-0.499972	-0.750334	0.0354368	-0.134575	0.452406	0.370922
chr1	12565001	12570000	3.94643	10	-0.477912	-0.554936	-0.559141	0.0835746	-0.0626704	0.462883	0.453506
chr1	12570001	12575000	3.98	10	-0.388682	-0.546607	-0.688251	0.103915	-0.179181	0.430819	0.340212
chr1	12585001	12590000	4.04664	10	-0.523908	-0.620844	-0.848115	0.184291	0.0201509	0.583841	0.319034
chr1	12600001	12605000	4.03158	10	-0.555759	-0.521794	-0.626696	0.244419	-0.0200911	0.410534	0.351267
chr1	12605001	12610000	4.01816	10	-0.291152	-0.300823	-0.351312	0.0793348	0.0283376	0.354614	0.320849
chr1	12610001	12615000	4.00338	10	-0.511117	-0.662852	-0.72353	0.201876	0.0196319	0.393265	0.331202
chr1	12615001	12620000	3.9889	10	-0.639559	-0.841009	-0.790852	0.254374	-0.0384164	0.181203	0.0488762
chr1	12620001	12625000	3.97643	10	-0.617335	-0.601308	-0.745638	0.264655	0.0549766	0.336729	0.323896
chr1	12630001	12635000	3.93599	10	-0.416137	-0.51138	-0.580919	0.262958	0.127114	0.37865	0.405388
chr1	12635001	12640000	3.90758	10	-0.366781	-0.430559	-0.351942	0.231838	0.0672679	0.405243	0.44122
chr1	12640001	12645000	3.87886	10	-0.314343	-0.337107	-0.412043	0.082922	0.103695	0.368704	0.393415
chr1	12645001	12650000	3.85369	10	-0.489203	-0.567779	-0.66409	0.130369	0.0927299	0.285262	0.320204
chr1	12650001	12655000	3.83225	10	-0.505739	-0.481299	-0.548059	0.186635	-0.0259545	0.383983	0.429041
chr1	12655001	12660000	3.8113	9	-0.484898	-0.442783	-0.536397	0.066242	0.0555372	0.448537	0.353719
chr1	12660001	12665000	3.78947	9	-0.339898	-0.402307	-0.40007	-0.00204133	0.0555258	0.345857	0.392522
chr1	12665001	12670000	3.76543	9	-0.450845	-0.367121	-0.503397	-9.6757e-05	0.170859	0.367723	0.37877
chr1	12670001	12675000	3.73784	9	-0.235603	-0.186573	-0.300453	-0.168399	0.0286424	0.281121	0.388414
chr1	12675001	12680000	3.72671	9	-0.408606	-0.221185	-0.358344	-0.0638663	0.0496031	0.445819	0.377936
chr1	12680001	12685000	3.7371	9	-0.289181	-0.272787	-0.261378	-0.115403	0.0514735	0.367413	0.320693
chr1	12685001	12690000	3.74522	9	-0.186281	-0.343777	-0.183171	0.0224423	0.027918	0.229041	0.233253
chr1	12690001	12695000	3.72728	9	-0.363619	-0.26386	-0.396156	-0.134087	0.0785181	0.285409	0.329814
chr1	12695001	12700000	3.6981	9	-0.122305	-0.00557624	-0.072706	-0.176759	0.0407952	0.362058	0.383175
chr1	12700001	12705000	3.68048	9	-0.0145615	-0.26178	-0.184635	-0.159827	0.00173301	0.243364	0.353962
chr1	12705001	12710000	3.66264	9	-0.0478314	-0.299315	-0.203349	-0.202867	0.0858508	0.215913	0.366723
chr1	12710001	12715000	3.63278	9	-0.341314	-0.316427	-0.294062	-0.261706	-0.0492635	0.178876	0.336954
chr1	12715001	12720000	3.57909	9	-0.411642	-0.231687	-0.361064	-0.171032	0.00960413	0.151602	0.175335
chr1	12720001	12725000	3.50267	9	-0.280406	-0.315534	-0.498163	-0.10862	0.0509075	0.0556861	0.0505185
chr1	12725001	12730000	3.41482	9	-0.257919	-0.426268	-0.385515	-0.151598	0.0258439	-0.0913239	0.233075
chr1	12730001	12735000	3.31908	9	-0.10794	-0.0300804	-0.0492768	-0.242667	-0.0911502	0.0320275	0.0102081
chr1	12735001	12740000	3.21901	9	0.135994	0.0915471	0.0710015	-0.315681	-0.0488944	0.013277	-0.0147057
chr1	12740001	12745000	3.10314	9	-0.146703	-0.276313	-0.142582	-0.330572	-0.0627724	-0.0104008	0.0887423
chr1	12750001	12755000	2.8021	9	0.241238	0.221878	0.22595	-0.261873	-0.120728	0.0809778	0.114323
chr1	12755001	12760000	2.62993	8	-0.340556	-0.381306	-0.478342	-0.17182	0.156868	-0.163909	0.0750917
chr1	12760001	12765000	2.45202	8	-0.321408	-0.496667	-0.521583	-0.0717113	0.162709	-0.0640373	0.0334752
chr1	12765001	12770000	2.27485	8	-0.248233	-0.125978	-0.206533	-0.102804	-0.0639717	-0.0483919	-0.0695451
chr1	12770001	12775000	2.10495	8	-0.455624	-0.438776	-0.567925	-0.166031	0.071833	-0.0570037	-0.0339023
chr1	12775001	12780000	1.94882	8	-0.320568	-0.422137	-0.361508	-0.0977073	0.201218	-0.0120391	0.11859
chr1	12780001	12785000	1.81297	8	-0.0928672	-0.106915	-0.127346	-0.250121	0.0501801	0.00296108	0.220339
chr1	12785001	12790000	1.68548	8	-0.219601	-0.408325	-0.497343	-0.209035	0.129446	-0.0559617	0.0980903
chr1	12790001	12795000	1.55368	7	-0.326268	-0.406568	-0.410783	-0.470243	0.057381	-0.167151	-0.0191673
chr1	12795001	12800000	1.42293	7	-0.380625	-0.477561	-0.481071	-0.202009	-0.0164046	-0.246873	-0.0210854
chr1	12800001	12805000	1.29856	7	-0.161087	-0.15856	-0.180981	-0.371022	-0.16638	-0.174096	-0.0571966
chr1	12805001	12810000	1.18594	7	-0.417329	-0.423736	-0.367879	-0.44273	0.0252957	-0.405087	-0.0481619
chr1	12810001	12815000	1.08952	7	-0.29327	-0.175178	-0.304931	-0.541808	-0.0971393	-0.261048	-0.137016
chr1	12815001	12820000	1.00503	7	-0.0359687	-0.164611	-0.272934	-0.507198	-0.0928065	-0.157441	-0.131824
chr1	12820001	12825000	0.924751	7	-0.136179	-0.291084	-0.389857	-0.299603	-0.0263115	-0.178357	-0.138346
chr1	12825001	12830000	0.840943	7	-0.491566	-0.379669	-0.599431	-0.288659	-0.0787928	-0.273138	-0.23001
chr1	12830001	12835000	0.763339	6	-0.166398	-0.233862	-0.406272	-0.378127	-0.180867	-0.294782	-0.183866
chr1	12835001	12840000	0.701113	6	-0.289765	-0.276304	-0.381487	-0.28099	-0.120885	-0.361041	-0.133616
chr1	12840001	12845000	0.645704	6	-0.231232	-0.258853	-0.508943	-0.406785	-0.0672477	-0.28241	-0.163453
chr1	12845001	12850000	0.588548	6	-0.18414	-0.100648	-0.332818	-0.531752	-0.0311754	-0.299876	-0.182422
chr1	12850001	12855000	0.521082	6	-0.220919	-0.207357	-0.263306	-0.390641	0.00875462	-0.293338	-0.180867
chr1	12855001	12860000	0.451678	6	-0.397122	-0.458608	-0.31315	-0.241759	-0.158361	-0.360317	-0.250185
chr1	12860001	12865000	0.389994	6	-0.410934	-0.357761	-0.576779	-0.190617	0.024417	-0.268641	-0.289912
chr1	12865001	12870000	0.329399	6	-0.0591452	-0.082752	-0.266192	-0.203328	-0.164134	-0.194449	-0.296537
chr1	12870001	12875000	0.263264	6	0.0166524	-0.0147431	-0.17417	-0.0178564	0.0555228	-0.0792182	-0.211882
chr1	12875001	12880000	0.18889	6	-0.157792	-0.294779	-0.373449	-0.190132	0.0238823	-0.199696	-0.301346
chr1	12880001	12885000	0.110554	6	-0.43524	-0.482987	-0.588852	-0.275091	-0.0343918	-0.470991	-0.26228
chr1	12885001	12890000	0.0320882	5	-0.3147	-0.349896	-0.325776	-0.488661	-0.0917487	-0.274296	-0.15918
chr1	12890001	12895000	-0.0426746	5	-0.177321	-0.167916	-0.350342	-0.339504	-0.0739236	-0.119052	-0.284598
chr1	12895001	12900000	-0.109902	5	-0.0146727	-0.0718315	-0.180269	-0.138727	0.00490184	-0.124519	-0.168289
chr1	12900001	12905000	-0.177821	5	-0.0029967	0.0539216	-0.318664	-0.120555	-0.0114791	-0.118493	-0.282608
chr1	12905001	12910000	-0.251252	5	-0.000713704	-0.180354	-0.0823126	-0.108871	-0.199294	-0.0595303	-0.317951
chr1	12910001	12915000	-0.321247	5	-0.166289	-0.40708	-0.131787	-0.0203889	-0.123359	-0.156007	-0.191391
chr1	12915001	12920000	-0.378858	5	-0.0713229	-0.082544	0.00673805	-0.0901026	0.0272723	-0.0430013	0.000210154
chr1	12920001	12925000	-0.430739	5	0.0491157	-0.0103551	-0.0630139	-0.0653177	0.11375	-0.00925589	-0.159036
chr1	12925001	12930000	-0.486321	5	0	0.000398542	-0.030535	0	0.0658153	0	-0.0633427
chr1	12930001	12935000	-0.540828	5	0	0	-0.122141	0	-0.118483	0	-0.147377
chr1	12935001	12940000	-0.589483	5	-0.030106	-0.0200599	-0.0996359	-0.02398	0.0202801	-0.030091	-0.0304194
chr1	12940001	12945000	-0.627507	5	-0.00935429	-0.0215089	-0.0477158	-0.0234309	0.0188784	-0.025577	-0.00638457
chr1	12945001	12950000	-0.649622	5	0	0	-0.076999	0	-0.0430258	0	-0.0684794
chr1	12995001	13000000	-0.447776	5	0	0	0	0	0	0	0
chr1	13000001	13005000	-0.447153	5	-0.0716695	-0.060663	-0.157627	-0.0594619	0.0101724	0.00263067	-0.0805607
chr1	13005001	13010000	-0.461335	5	-0.065761	-0.0278525	-0.100123	-0.0501557	-0.00964674	-0.00163558	-0.0641948
chr1	13010001	13015000	-0.48694	5	0.0573377	-0.0113639	0.0361706	-0.0707555	1.48935e-05	-0.0298885	-0.0347553
chr1	13015001	13020000	-0.517571	5	0.0549903	-0.00434626	0.0226903	-0.0742616	-0.122462	-0.0197354	-0.0862512
chr1	13020001	13025000	-0.551512	5	0	0	-0.0164011	0	-0.0633143	0	-0.0296695
chr1	13025001	13030000	-0.587048	5	0	0	-0.0382823	0	-0.0055074	0	-0.033642
chr1	13030001	13035000	-0.622464	5	0	0	-0.0346165	0	-0.0400131	0	-0.118229
chr1	13035001	13040000	-0.669179	5	0	0	0.0209001	0	-0.0174917	0	-0.210747
chr1	13040001	13045000	-0.731229	5	0	0	0.00371789	0	0.00058418	0	-0.0703355
chr1	13045001	13050000	-0.795824	4	-0.103786	-0.037094	-0.0207383	-0.0549978	0.0430296	-0.0115472	-0.194403
chr1	13050001	13055000	-0.850177	4	-0.0817874	-0.0371187	-0.181205	-0.0532403	-0.0666583	-0.0478451	-0.278409
chr1	13055001	13060000	-0.915643	4	-0.13337	-0.102368	-0.185044	-0.151253	-0.0808403	-0.111486	-0.380919
chr1	13060001	13065000	-1.00911	4	-0.0632008	-0.034116	-0.067782	-0.00583928	-0.0152182	0.00439181	-0.0964582
chr1	13065001	13070000	-1.11108	4	0	0	-0.0209286	0	-0.00720937	0	-0.0329448
chr1	13070001	13075000	-1.20208	4	0	0	-0.0109981	0	-0.0254583	0	-0.0288429
chr1	13075001	13080000	-1.2626	4	0	0	0	0	0	0	0
chr1	13080001	13085000	-1.31775	4	0	0	0	0	0	0	0
chr1	13085001	13090000	-1.39078	4	0	0	0	0	0	0	0
chr1	13090001	13095000	-1.45941	4	0	0	0	0	0	0	0
chr1	13095001	13100000	-1.50139	4	0	0	0	0	0	0	0
chr1	13100001	13105000	-1.52215	4	-0.102422	-0.181136	-0.321669	-0.053079	0.0141191	-0.145353	-0.206472
chr1	13105001	13110000	-1.53942	4	-0.268088	-0.353423	-0.323701	-0.0921009	0.0422407	-0.300464	-0.55446
chr1	13110001	13115000	-1.54941	4	-0.246627	-0.159862	-0.0863973	-0.157252	-0.000176131	-0.375441	-0.371631
chr1	13115001	13120000	-1.54832	4	-0.33901	-0.193863	-0.186291	-0.401031	-0.036295	-0.344081	-0.359696
chr1	13120001	13125000	-1.53233	4	0.0174458	-0.029118	-0.0167144	-0.154745	-0.0544136	-0.219053	-0.342359
chr1	13125001	13130000	-1.47311	4	-0.0023725	0.00176425	0.00108701	-0.00323485	-0.00184461	-0.0014031	-0.00555152
chr1	13130001	13135000	-1.37034	4	0	0	0	0	0	0	0
chr1	13135001	13140000	-1.26231	4	0	0	0	0	0	0	0
chr1	13140001	13145000	-1.18727	4	0	0	0	0	0	0	0
chr1	13145001	13150000	-1.132	4	0	0	0	0	0	0	0
chr1	13150001	13155000	-1.06151	4	0	0	0	0	0	0	0
chr1	13155001	13160000	-0.981446	4	0	0	0	0	0	0	0
chr1	13160001	13165000	-0.897445	4	0	0	0	0	0	0	0
chr1	13165001	13170000	-0.815151	4	-0.0803059	-0.0521084	-0.0357875	-0.0769545	-0.0486712	-0.0717626	-0.0566168
chr1	13170001	13175000	-0.740205	5	-0.0536192	-0.125931	-0.0405355	-0.108457	-0.11728	-0.184526	-0.0979144
chr1	13175001	13180000	-0.678248	5	0.00927727	-0.013722	0.00506521	-0.0174389	0.000313815	-0.0208726	-0.00194803
chr1	13180001	13185000	-0.634922	5	0	0	0	0	0	0	0
chr1	13185001	13190000	-0.608571	5	0	0	0	0	0	0	0
chr1	13190001	13195000	-0.591563	5	0	0	0	0	0	0	0
chr1	13195001	13200000	-0.580578	5	0	0	0	0	0	0	0
chr1	13200001	13205000	-0.572296	5	0	0	0	0	0	0	0
chr1	13205001	13210000	-0.563395	5	0	0	0	0	0	0	0
chr1	13210001	13215000	-0.581028	5	0	0	0	0	0	0	0
chr1	13215001	13220000	-0.633303	5	0	0	0	0	0	0	0
chr1	13220001	13225000	-0.688333	5	-0.13756	-0.227505	-0.202384	-0.179362	-0.0686132	-0.343151	-0.288351
chr1	13225001	13230000	-0.714229	5	-0.42415	-0.494576	-0.720872	-0.34481	-0.0720718	-0.716214	-0.597222
chr1	13230001	13235000	-0.716136	5	-0.473078	-0.394675	-0.567669	-0.308574	-0.107116	-0.68769	-0.709551
chr1	13235001	13240000	-0.71917	5	-0.436107	-0.452085	-0.507919	-0.267992	-0.24123	-0.570948	-0.585146
chr1	13240001	13245000	-0.721405	5	-0.541532	-0.448207	-0.525778	-0.195208	-0.114209	-0.540573	-0.71437
chr1	13245001	13250000	-0.720915	5	-0.373962	-0.355789	-0.285153	-0.275078	-0.0312767	-0.41551	-0.400579
chr1	13250001	13255000	-0.715774	5	-0.00500083	0.000703997	0.0617262	0.00120565	0.00866074	-0.00680937	-0.0615618
chr1	13255001	13260000	-0.681818	5	0	0	0.0640677	0	0.0218741	0	-0.084333
chr1	13260001	13265000	-0.617058	5	0	0	-0.0430577	0	0.0968408	0	-0.177077
chr1	13265001	13270000	-0.552827	5	-0.0140216	-0.0686764	-0.120374	-0.0701164	0.0627329	-0.0992913	-0.235137
chr1	13270001	13275000	-0.520461	5	-0.0123862	-0.110575	-0.116826	-0.0473027	0.0062843	-0.0918216	-0.105352
chr1	13275001	13280000	-0.494757	5	0.0852286	0.0828164	0.110713	0.00203974	-0.0217245	-0.011866	-0.0748197
chr1	13280001	13285000	-0.444586	5	0.0359031	0.0487427	-0.0172981	-0.0203636	-0.0402374	-0.0200548	-0.139083
chr1	13285001	13290000	-0.392401	5	-0.0901224	-0.0775785	-0.189411	-0.0771413	-0.00371251	-0.0492407	-0.347765
chr1	13290001	13295000	-0.360649	5	-0.118711	-0.0787308	-0.0510789	-0.0905167	0.038667	-0.0456771	-0.148014
chr1	13295001	13300000	-0.37178	5	-0.0941099	-0.25318	-0.326187	-0.0297437	-0.0121316	-0.162189	-0.213366
chr1	13300001	13305000	-0.422581	5	0.0369168	-0.103671	0.012346	-0.0423523	0.0148555	-0.120027	-0.141798
chr1	13305001	13310000	-0.490557	5	-0.0300179	-0.0336669	-0.13181	-0.0732846	-0.0621308	-0.0852163	-0.262958
chr1	13310001	13315000	-0.569239	5	-0.148434	-0.160763	-0.337339	-0.219818	-0.123471	-0.268798	-0.50261
chr1	13315001	13320000	-0.652157	5	-0.406628	-0.370846	-0.522672	-0.101184	0.0612415	-0.538245	-0.599575
chr1	13320001	13325000	-0.76475	4	-0.309304	-0.284271	-0.47309	-0.183178	-0.00238214	-0.469458	-0.478233
chr1	13325001	13330000	-0.919944	4	-0.152399	-0.0985682	-0.234281	-0.256715	0.00035741	-0.361531	-0.528658
chr1	13330001	13335000	-1.0925	4	-0.187889	-0.183361	-0.165719	-0.145227	0.11541	-0.117082	-0.613218
chr1	13335001	13340000	-1.25719	4	-0.00635318	-0.0283236	-0.160287	-0.136852	-0.0554862	-0.207312	-0.384273
chr1	13340001	13345000	-1.38876	4	-0.359381	-0.269547	-0.474098	-0.110357	0.0161065	-0.450167	-0.576275
chr1	13345001	13350000	-1.51655	4	-0.265027	-0.322861	-0.583924	-0.134499	0.014358	-0.199388	-0.531724
chr1	13350001	13355000	-1.66934	4	-0.226987	-0.234885	-0.365062	-0.158882	0.0948978	-0.225967	-0.442696
chr1	13355001	13360000	-1.82109	3	-0.150087	-0.109977	-0.0858205	-0.205586	0.0974712	-0.253294	-0.259441
chr1	13360001	13365000	-1.94573	3	-0.269494	-0.320671	-0.201003	-0.154605	0.0336457	-0.223317	-0.282958
chr1	13365001	13370000	-2.05752	3	-0.360006	-0.419212	-0.412689	-0.322705	0.00279764	-0.213416	-0.566903
chr1	13370001	13375000	-2.18092	3	-0.505055	-0.468793	-0.583747	-0.114776	0.0854054	-0.416748	-0.685832
chr1	13375001	13380000	-2.30515	3	-0.540855	-0.46761	-0.557277	-0.047507	-0.0438836	-0.466001	-0.513092
chr1	13380001	13385000	-2.41944	3	-0.380302	-0.474265	-0.47404	-0.114489	0.0522286	-0.342351	-0.586607
chr1	13385001	13390000	-2.51301	3	-0.409845	-0.483196	-0.463733	-0.135643	0.097116	-0.395476	-0.62083
chr1	13390001	13395000	-2.59213	3	-0.512106	-0.500837	-0.602545	-0.044278	0.104632	-0.416916	-0.660263
chr1	13395001	13400000	-2.66717	2	-0.368502	-0.20526	-0.405288	-0.0353911	-0.0722396	-0.40738	-0.779092
chr1	13400001	13405000	-2.73347	2	-0.308336	-0.0905388	-0.349524	-0.0876932	-0.0948262	-0.464813	-0.829137
chr1	13405001	13410000	-2.78639	2	-0.15772	-0.119518	-0.235682	0.0214638	-0.0397123	-0.446144	-0.543152
chr1	13410001	13415000	-2.81538	2	-0.21428	-0.234548	-0.362731	-0.0755787	0.0546006	-0.485233	-0.565054
chr1	13415001	13420000	-2.82017	2	-0.548717	-0.504841	-0.598465	-0.0142293	0.116041	-0.58732	-0.594988
chr1	13420001	13425000	-2.81161	2	-0.435225	-0.51776	-0.409064	0.0623915	-0.0759875	-0.521201	-0.636443
chr1	13425001	13430000	-2.8005	2	-0.520403	-0.495012	-0.507428	-0.0593809	0.0942623	-0.391649	-0.724238
chr1	13430001	13435000	-2.79767	2	-0.541164	-0.510825	-0.586353	0.0231357	0.069333	-0.434636	-0.673747
chr1	13435001	13440000	-2.79743	2	-0.464464	-0.329437	-0.563081	0.139603	-0.0235054	-0.493943	-0.683139
chr1	13440001	13445000	-2.78901	2	-0.38025	-0.374684	-0.39492	0.000312558	-0.0175004	-0.477905	-0.586561
chr1	13445001	13450000	-2.77559	2	-0.320309	-0.348051	-0.455521	-0.102484	-0.0489948	-0.461909	-0.535341
chr1	13450001	13455000	-2.76038	2	-0.19515	-0.302714	-0.469959	-0.00516488	-0.0181783	-0.535591	-0.664079
chr1	13455001	13460000	-2.74231	2	-0.288723	-0.315197	-0.596595	0.0152001	0.223975	-0.361107	-0.576598
chr1	13465001	13470000	-2.68951	2	-0.492101	-0.449573	-0.587179	0.0863849	0.116848	-0.410579	-0.456935
chr1	13470001	13475000	-2.65567	2	-0.597872	-0.496269	-0.58287	0.0722745	-0.0279538	-0.443393	-0.394312
chr1	13475001	13480000	-2.61749	3	-0.438275	-0.356368	-0.396097	0.00977558	0.134455	-0.512656	-0.368092
chr1	13485001	13490000	-2.52988	3	-0.547449	-0.620991	-0.662412	0.106392	0.105836	-0.489276	-0.531782
chr1	13490001	13495000	-2.4586	3	-0.427409	-0.38133	-0.53252	0.092156	0.176204	-0.504491	-0.376842
chr1	13495001	13500000	-2.35397	3	-0.557368	-0.492358	-0.49968	0.00186023	0.0379912	-0.534268	-0.52283
chr1	13500001	13505000	-2.23853	3	-0.389191	-0.569546	-0.540495	-0.00332391	-0.0443008	-0.420428	-0.497037
chr1	13510001	13515000	-2.0654	3	-0.430892	-0.688202	-0.725023	0.0485322	0.2803	-0.250814	-0.379918
chr1	13515001	13520000	-2.02013	3	-0.47751	-0.540736	-0.574202	0.0848698	0.254042	-0.373567	-0.46728
chr1	13520001	13525000	-1.97464	3	-0.389739	-0.277418	-0.38183	0.122177	0.189511	-0.402675	-0.500557
chr1	13525001	13530000	-1.93014	3	-0.41743	-0.397856	-0.632118	0.0771144	0.0327335	-0.548575	-0.797424
chr1	13530001	13535000	-1.88784	3	-0.106178	-0.212793	-0.203611	-0.0486307	0.00195161	-0.36039	-0.643187
chr1	13535001	13540000	-1.84896	3	-0.349752	-0.376162	-0.524956	-0.0735924	0.126514	-0.409671	-0.488048
chr1	13540001	13545000	-1.81469	3	-0.496401	-0.473469	-0.678247	-0.0774643	0.329255	-0.390639	-0.523212
chr1	13545001	13550000	-1.78625	3	-0.224655	-0.221378	-0.333548	-0.00128277	0.16226	-0.440964	-0.519108
chr1	13550001	13555000	-1.76484	4	0.0720603	0.013588	-0.0543412	-0.0784671	0.130977	-0.245161	-0.500955
chr1	13555001	13560000	-1.75136	4	-0.0551932	-0.118056	-0.00584651	-0.0530909	0.0448764	-0.336844	-0.385604
chr1	13560001	13565000	-1.74481	4	-0.320415	-0.33676	-0.480741	0.0133809	0.272176	-0.413484	-0.464661
chr1	13565001	13570000	-1.74363	4	-0.198758	-0.259015	-0.352826	-0.0959329	0.0508569	-0.344796	-0.513324
chr1	13570001	13575000	-1.74623	4	-0.103494	-0.0356388	-0.0426614	-0.0870302	0.0835326	-0.341254	-0.472302
chr1	13580001	13585000	-1.75646	4	-0.421153	-0.346709	-0.509413	-0.168432	0.0754692	-0.474185	-0.524002
chr1	13585001	13590000	-1.77538	3	-0.369147	-0.247544	-0.386034	-0.0105657	NA	-0.427292	-0.451803
chr1	13590001	13595000	-1.81193	3	-0.341788	-0.304216	-0.449537	-0.131169	0.158828	-0.370439	-0.334626
[truncated: 443,323+ more rows]
