# Supplementary material for: Genome-wide alterations of uracil distribution patterns in human DNA upon chemotherapeutic treatments
Source: eLife. 2020 Sep 21;9:e60498. doi: 10.7554/eLife.60498 (PMC7505663; doi:10.7554/eLife.60498)
Supplement: Figure 8—source data 1. [file elife-60498-fig8-data1.xlsx]

## Sheet: Figure 8-source data 1
	H3K36me3				H3K27me3
	NT_UGI	5FdUR_UGI	RTX_UGI		NT_UGI	5FdUR_UGI	RTX_UGI
	0.93297	1.66362	1.4421		1.18426	1.90157	3.0554
	1.16368	2.73515	3.14356		1.23017	1.27182	1.62295
	1.47727	2.36834	2.92132		1.3169	1.67743	1.68967
	1.28508	1.69737	1.21746		1.42823	2.85249	2.22949
	1.22919	2.09833	1.66872		1.38763	1.0936	1.38258
	0.98185	3.81449	1.22147		1.18895	1.15637	1.43082
	0.97957	2.13265	1.51728		0.93311	1.95701	2.35504
	1.39764	2.47963	1.19955		1.36732	1.60949	1.73913
	1.13363	2.32265	1.25576		0.90659	1.62964	2.36619
	1.04442	2.47506	0.82072		1.19829	1.26279	4.37289
	1.2566	1.28909	1.06818		0.95483	1.23606	1.686
	1.10605	2.59057	0.93649		1.23402	1.59643	1.60516
	1.25402	1.84769	1.84789		1.03355	1.39458	3.30919
	1.24453	1.52703	1.13893		1.09592	1.46913	1.92918
	1.2024	1.61577	1.20032		1.04724	1.53497	3.27593
	1.26955	1.69234	0.94791		1.08827	1.33583	2.57476
	1.11833	1.51681	0.75754		1.05208	1.56389	3.12444
	1.19159	0.80977	1.96967		1.24657	2.29534	3.27372
	1.14719	3.33745	1.68689		1.21379	1.30127	3.48856
	1.1261	2.91493	1.08853		1.0816	1.42257	1.87139
	1.18398	1.26042	1.17337		1.28957	2.01233	1.94227
	0.98354	3.02558	1.97189		1.34695	2.85511	1.49111
	1.39066	2.30027	3.58782		1.06261	2.92184	1.65606
	1.15826	2.7755	2.80184		1.39841	2.71603	1.75613
	1.10276	3.36707	2.28674		1.17806	1.68758	1.85153
	1.22452	2.37331	2.62745		1.11035	2.03023	3.95764
	1.73435	2.52665	0.68759		1.22835	2.80005	1.87331
	1.28875	1.52007	1.71361		1.28523	2.32125	1.05823
	1.23156	1.51662	0.61369		1.16449	3.48831	2.8075
	0.91834	2.77156	0.95619		1.04343	1.90948	3.02048
	1.03821	2.46377	2.92681		0.98139	2.0956	1.44297
	1.22479	2.14701	2.12946		1.12761	2.61587	2.87791
	1.20702	3.07201	2.11582		1.04394	1.30702	1.97844
	0.92956	3.57071	1.74388		1.31018	1.27352	2.74847
	1.09537	4.63421	1.65909		1.2223	2.42354	4.35998
	0.93578	2.11348	2.16629		1.16314	1.54943	1.5889
	1.03144	3.02029	2.13123		1.33783	1.20885	1.96418
	1.02391	2.5	2.41433		1.27728	3.28577	2.33871
	1.08163	1.27433	1.67036		1.34843	1.31324	2.09647
	1.14399	0.96845	1.98977		1.33702	1.02859	3.03129
	1.0776	1.55715	1.90153		1.15952	1.1827	1.38408
	1.07447	2.12039	1.10597		1.1938	1.80218	2.29619
	1.11683	1.74664	1.84683		1.2778	2.6962	1.77303
	1.14524	1.05146	2.23623		1.19472	2.28818	2.97162
	1.46194	2.40142	1.61355		1.11212	2.11437	2.3477
	1.28105	2.84262	1.39805		1.18645	2.96209	1.32597
	1.243	1.62726	2.52636		1.12051	2.0574	3.73722
	1.1825	1.92944	2.87104		1.09933	1.52609	2.13431
	1.09986	1.02909	2.16231		1.13255	1.45178	3.71876
	1.23891	2.30045	3.80342		1.14147	0.9666	2.74812
	1.20316	1.52096	3.38054		0.9695	1.5489	1.65892
	1.18236	1.92638	1.57218		1.1479	1.26446	1.66819
	0.8587	1.05241	2.07874		1.15806	1.47591	1.686
	1.11119	1.78456	1.20971		0.93328	1.68845	2.54406
	1.46616	1.89387	2.03207		1.23849	2.19634	2.74397
	1.31397	0.79885	1.71613		1.15747	1.96571	3.03437
	1.36122	3.12815	1.12176		1.20205	2.36443	2.11058
	0.94029	1.50226	0.87019		1.14855	1.2178	2.6649
	1.35191	1.31068	1.27907		1.30797	1.71816	4.54096
	1.28055	0.83471	1.23033		1.19387	1.46846	5.87831
	1.18776	2.36689	1.07886		1.12835	1.33228	3.92174
	1.20804	1.73035	1.08445		1.19805	0.97724	3.28973
	1.03087	1.45353	1.6347		1.2239	1.37368	3.81805
	0.95706	0.83346	3.5322		1.05938	1.11507	1.23419
	1.33274	1.51107	2.23418		1.13139	1.1676	1.30898
	1.04581	1.86191	2.46674		0.89312	0.93433	1.98454
	0.90499	1.75955	1.64778		1.0419	1.23245	2.74635
	0.95144	1.42525	1.40946		0.99298	1.11536	2.7454
	0.98186	1.63483	2.80673		1.30498	1.53145	2.4808
	1.06661	1.5543	1.65096		1.3428	1.20674	5.66356
	0.97916	2.28939	1.40925		1.25546	1.79791	3.35772
	1.28995	1.7044	1.83538		1.64398	1.61932	3.34272
	1.10079	1.78842	0.80938		1.30883	2.64306	1.72768
	1.06041	2.7102	3.19789		1.31411	2.90817	5.52187
	1.09987	1.9255	3.51167		1.12452	2.65918	3.19597
	1.20118	1.82845	3.61119		1.06245	2.22606	1.82983
	0.92372	2.28316	1.94171		1.03587	1.8465	2.15624
	0.83431	2.28747	2.07996		1.03727	1.06523	1.41767
	1.31457	2.0681	2.55897		1.28985	1.33268	2.13964
	0.92261	2.34091	2.47327		1.07618	3.80442	3.0174
	1.25312	1.04002	2.72898		0.92925	3.24336	3.80901
	1.05377	3.37635	1.98591		1.08853	3.62308	4.16555
	0.83943	0.98739	1.96913		1.2015	2.06793	1.45298
	0.55704	1.33778	2.24101		1.12146	1.88274	2.62698
	1.24429	1.73135	2.11635		1.0926	1.37439	1.4791
	0.99559	1.12628	1.40593		1.00479	2.20559	2.6924
	1.20477	1.73815	2.62		1.11974	1.91839	2.86031
	1.17787	2.24553	3.45807		1.23947	1.68708	1.68647
	1.30409	2.80214	3.69102		1.11752	1.35966	2.18357
	1.05243	1.73853	2.20271		1.27397	3.52598	2.65616
	1.11531	2.01102	2.98931		1.41631	2.61555	2.79789
	1.09026	1.30932	2.04		1.22981	1.5238	4.22548
	0.98353	2.24818	2.29726		1.20509	1.33538	1.18847
	0.97625	2.29466	3.09882		1.28334	1.81925	2.3048
	1.02577	1.68892	1.57876		1.25792	2.03045	2.59098
	1.13539	1.73462	3.45972		1.36521	3.49914	2.52711
	1.21428	0.81337	1.67473		1.36945	2.25721	1.4003
	1.0963	3.81968	1.56797		1.19191	2.26298	1.93153
	1.1211	2.52034	1.558		1.26585	2.08164	3.12962
	1.18107	1.54832	1.29119		1.02428	1.70048	5.41207
	0.94932	1.13816	2.86401		1.19495	2.10453	4.08366
	1.2211		2.27433		1.34533	1.78172	2.19348
	1.08861		1.64864		0.9634	1.8843	3.24184
	1.10035		1.37338		1.11419	1.66047	3.09162
	1.08677		0.91904		0.89949	1.24243	1.87569
	0.96165		3.92133		1.16892	1.61366	1.86017
	1.06645		2.53017		1.0062	1.75612	2.99529
	1.22511		1.77743		1.07718	1.5508
	0.9696		2.81094		1.24333	2.51466
	1.0982		3.77822		1.17599	1.74094
	1.03557		2.51285		0.98778	1.88744
	1.34242		2.94843		1.24968	1.16213
	1.09031		2.2373		1.40233	2.48796
	1.03831		2.08541		1.46521	1.23427
	1.16312		2.71651		1.02318	1.19999
	1.08844		1.7318		0.97757	1.28364
	1.1752		1.80153		1.0028	1.18254
	0.91965		1.23071		0.82537	1.25604
	1.11824		1.06027		1.16573	1.67204
	0.94447		1.43546		1.0117	1.66895
	1.07125		1.68575		1.20019	1.69283
	1.02585		1.91873		1.20117	1.34349
	1.23086		1.20344		1.34933	2.11034
	1.00771		2.60372		1.31259	1.71893
	1.01816		2.14992		1.49585	1.83392
	1.16675		2.40779		1.17537	1.69283
	1.00809		1.94127		1.26269	2.0694
	0.98919		2.24196		0.88378	1.91181
	1.07546		2.33835		1.37445	1.84941
	1.00432		1.57023		1.09819	2.04797
	1.17811		1.54121		1.02671	1.96785
	0.98557		2.98637		1.07586	1.68597
	1.02549		2.64171		1.12486	1.6334
	0.87734		2.23315		1.13358	1.78726
	1.11004		2.02786		1.33321	2.12611
	1.03928		3.23719		0.99719	1.88746
	1.16911		3.5636		1.0933	1.75032
	0.96696		2.48284		1.10578	1.90166
	1.03617		2.74262		1.10465	1.33604
	1.17429		3.72241		1.10581	1.42099
	1.10244		2.30048		1.10197	1.47267
	1.19345		2.06045		1.18999	1.75504
	1.19929		0.84287		1.50916	1.3162
	1.06485		2.14442		1.07911	1.23461
	1.05003		0.9802		1.00185	1.53376
	1.12527		1.44846		1.26209	1.45026
	0.97059		1.38692		1.31147	1.26387
	0.89672		0.93103		0.87147	1.71179
	1.08718		1.39779		1.0949	1.62065
	0.89506		2.46883		1.4299	1.71895
	1.04491		1.36945		1.08461	1.58167
	1.03093		2.91976		1.1078
	1.10275		1.2847		1.2034
	1.06425				1.08308
	1.02437
	1.10188
	1.0136
	1.01188
	1.13593
	1.12317
	1.03448
	1.18582
	0.99088
	1.03486
	1.05627
	0.88455
	1.03891
	0.95565
	0.89353
	1.03959
	1.10355
	1.14303
	0.94458
	0.94488
	1.01948
	1.1298
	1.11353
	1.15652
	1.15269
	1.16443
	1.00244
	0.93312
	1.15368
	1.00607
	1.07754
	1.03379
	0.88662
	1.08787
	1.19393
	1.03676
	1.08061
	1.1032
	0.98582
	0.96487
	1.07744
	1.0635
	1.02284
	0.93858
	1.06415
	1.06278
	1.01898
	1.12059
	1.01015
	0.97739
	1.03482
Mean	1.09504	2.01085	2.01148		1.16799	1.81177	2.58462
SEM	0.00950864	0.0741076	0.0634927		0.0115223	0.0483758	0.0990983
n	205	101	153		154	151	107
