# Supplementary material for: Genome-wide alterations of uracil distribution patterns in human DNA upon chemotherapeutic treatments
Source: eLife journal article supplement (doi:10.7554/elife.60498), 2020-09-21

**Supplementary file 2**

IGV views of log2 ratio and regions of uracil enrichment on all the chromosomes
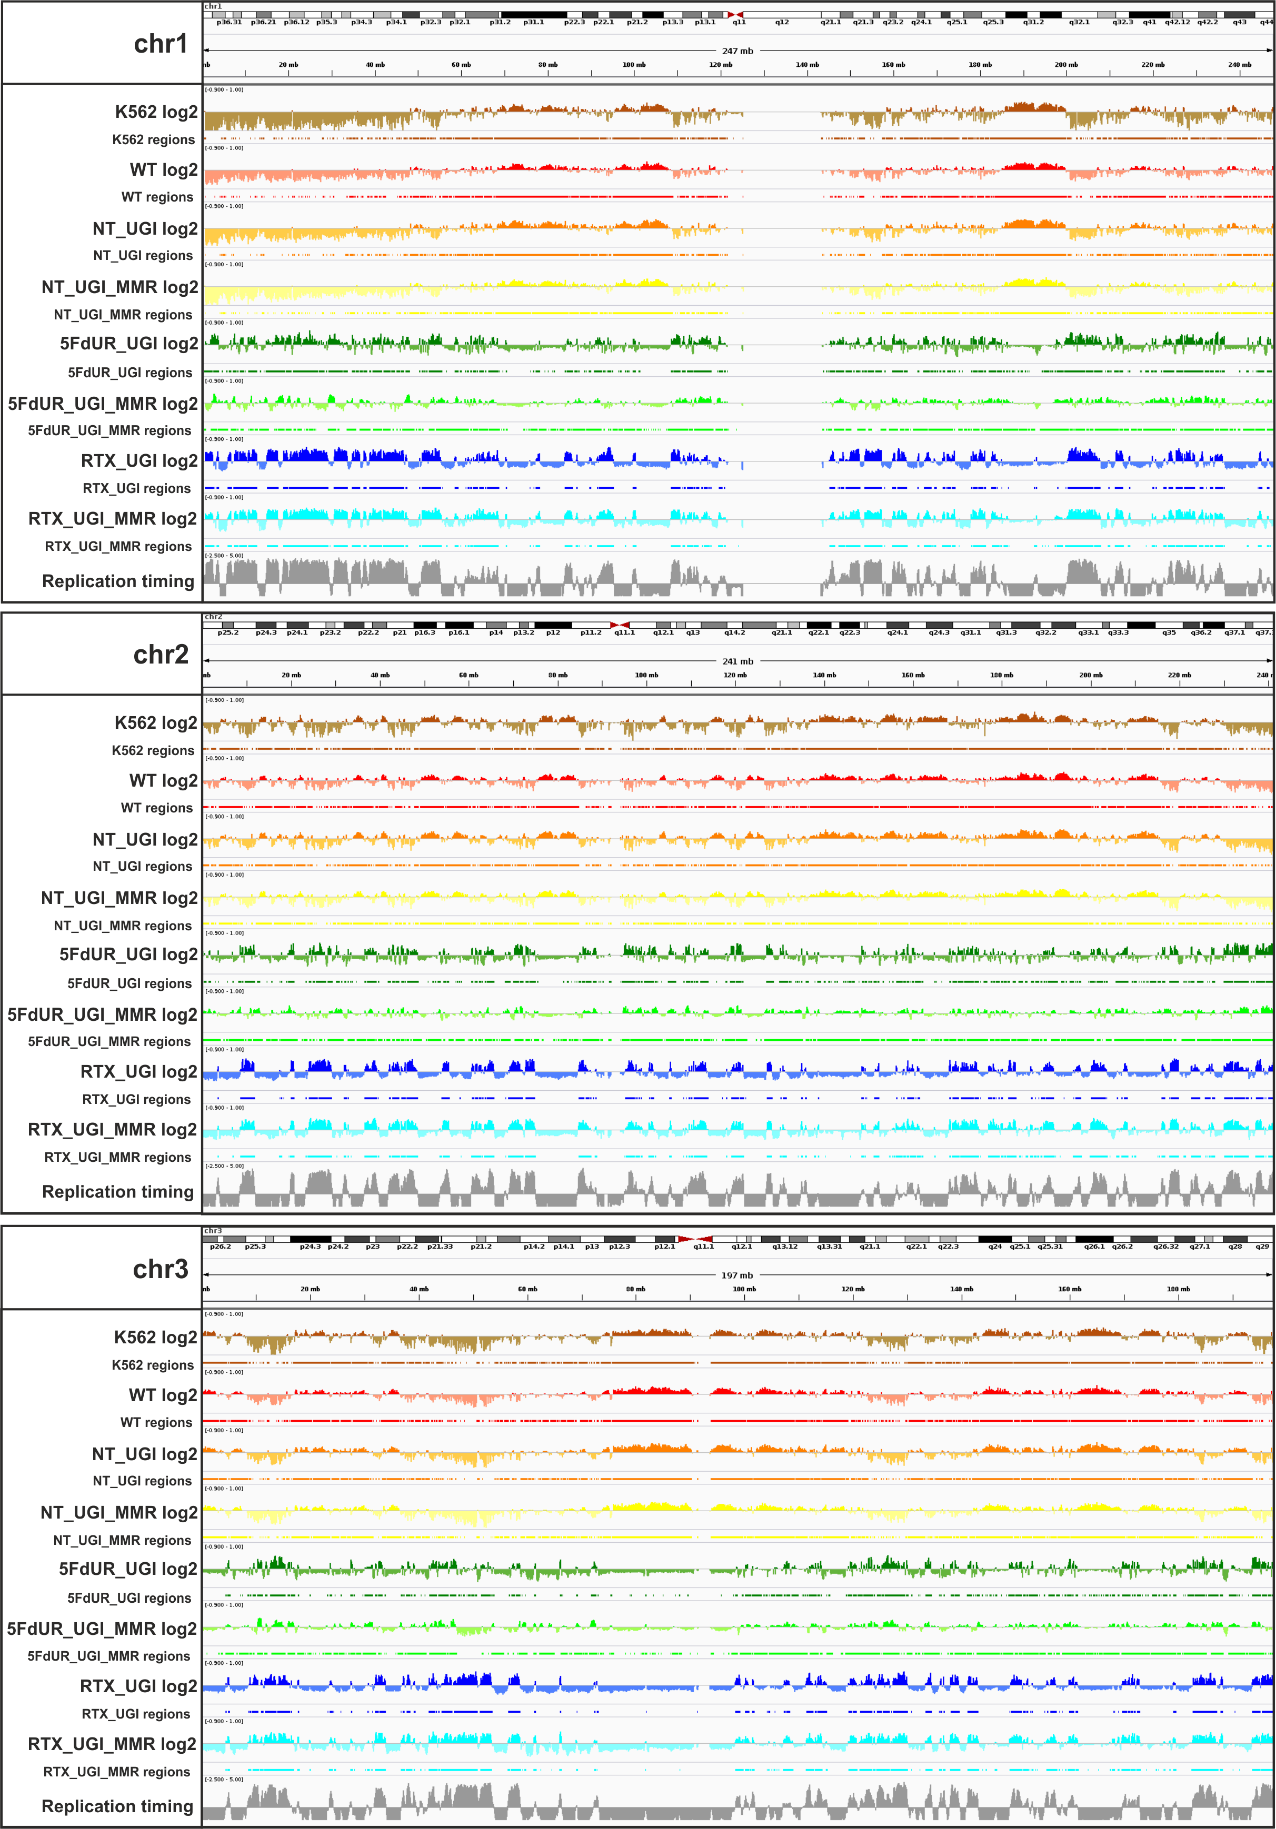

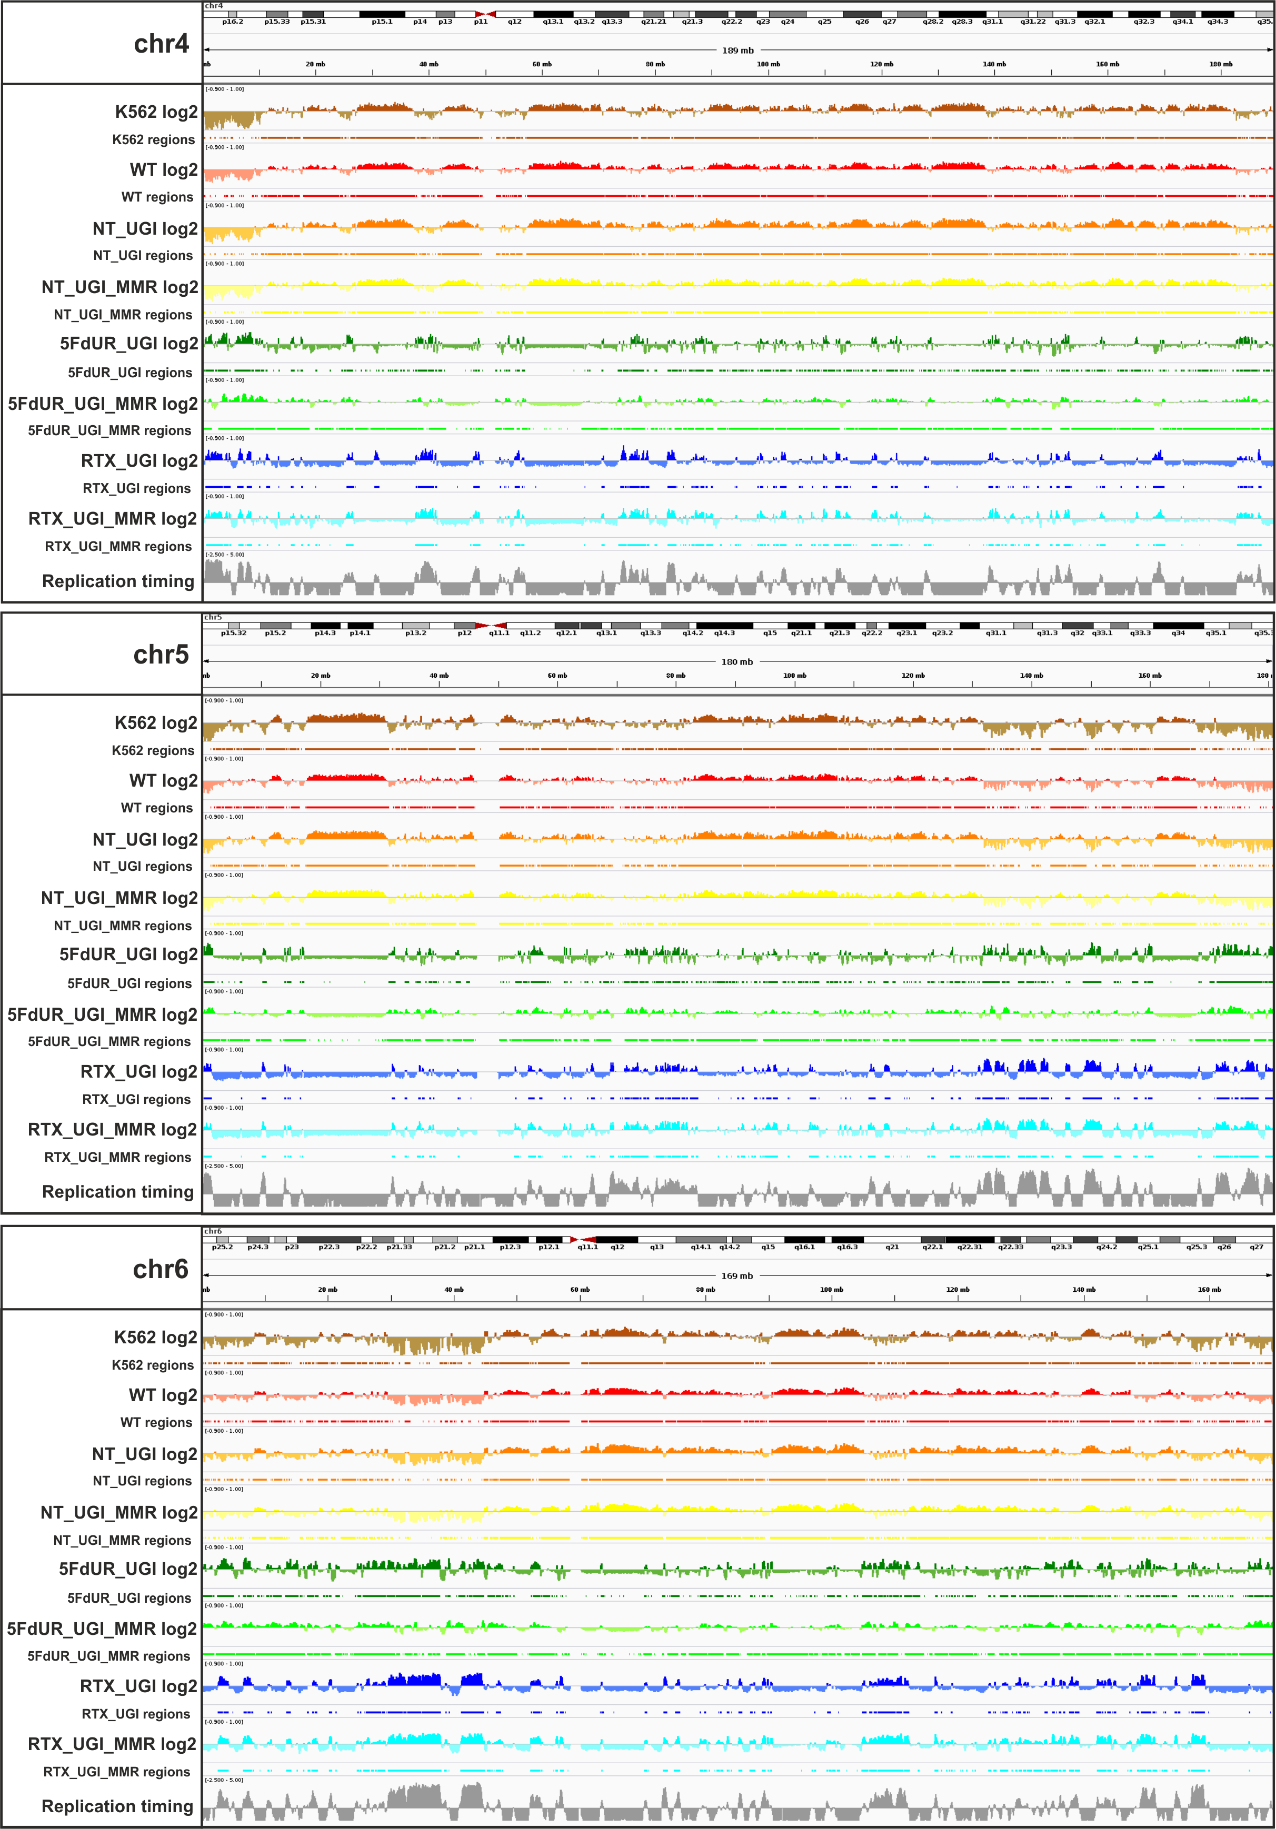

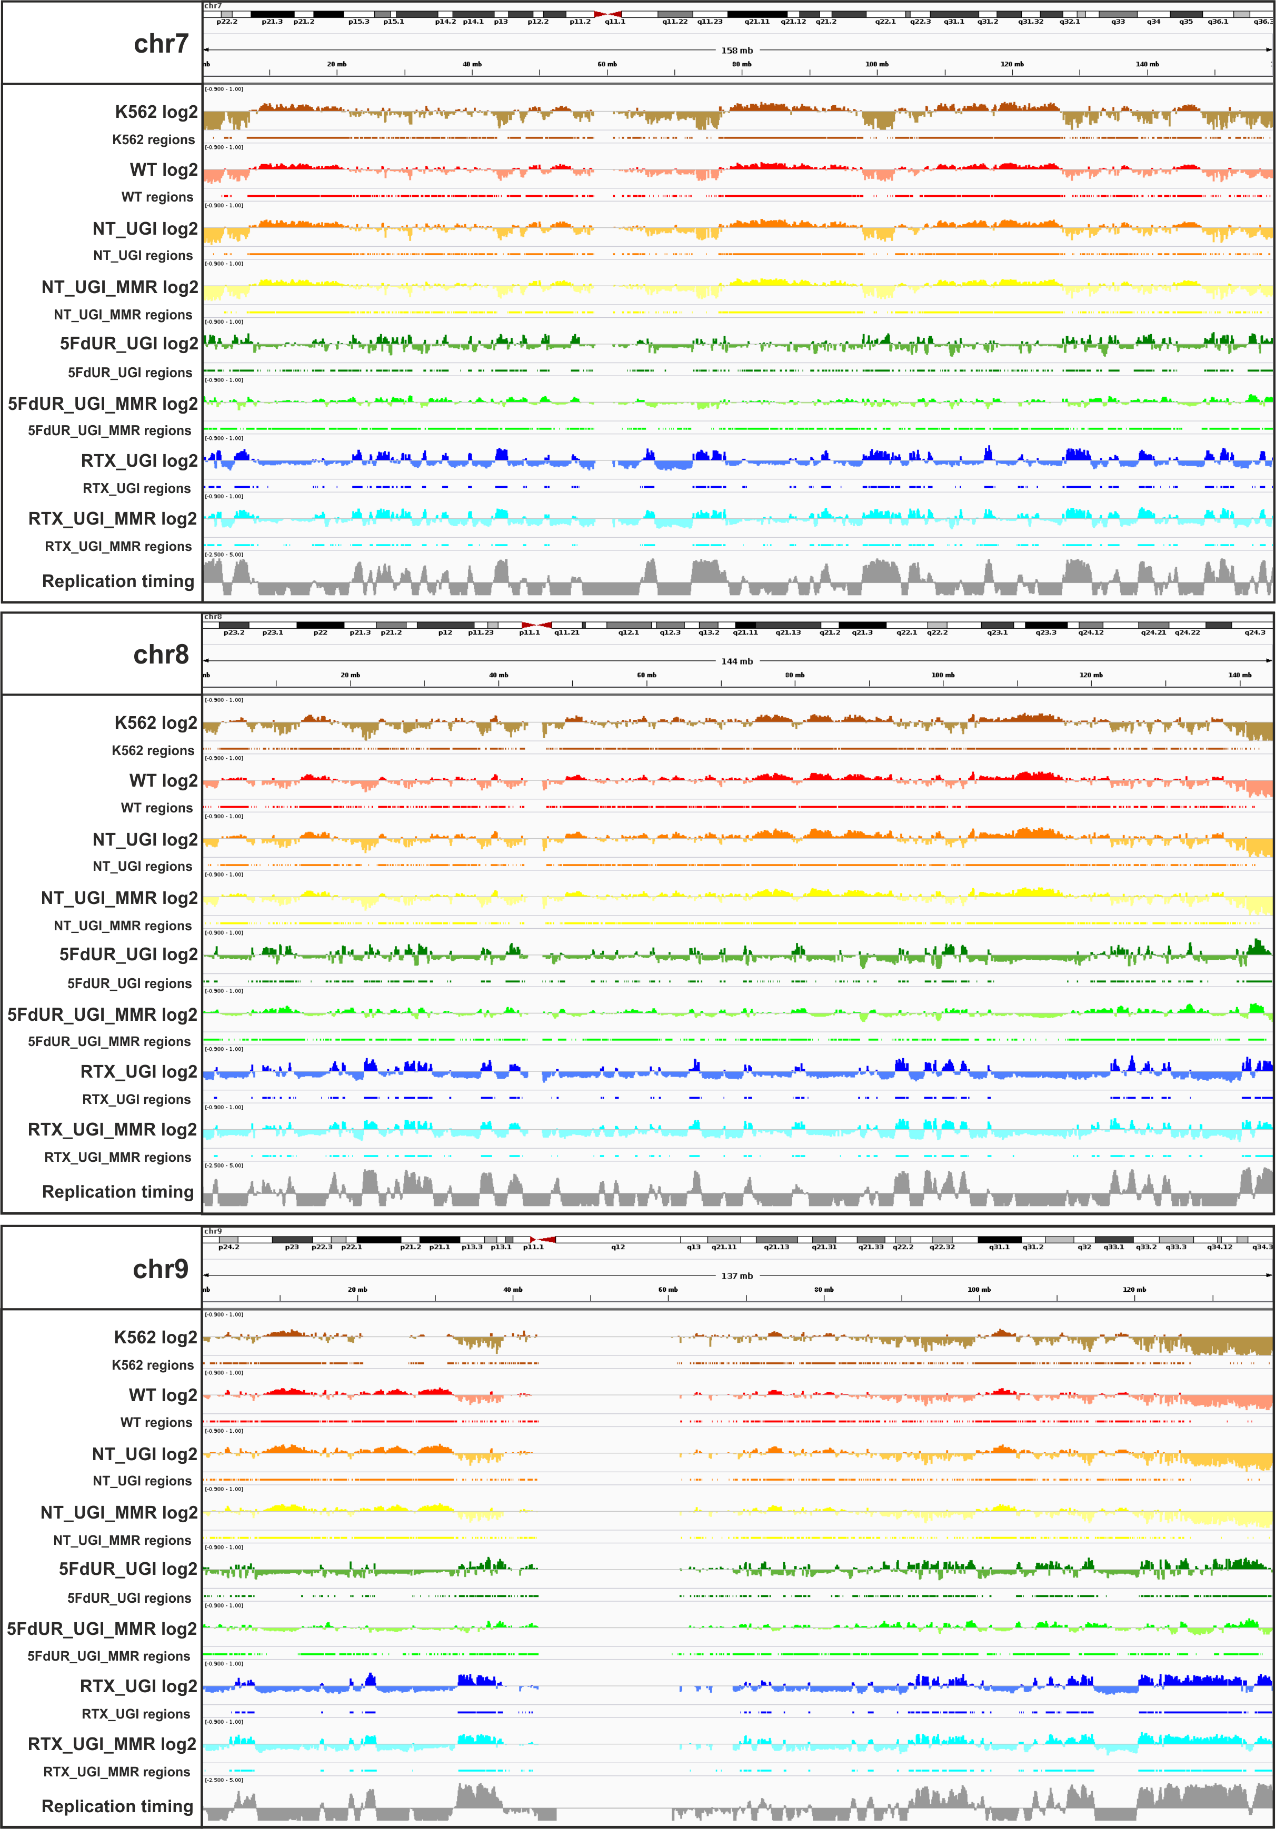

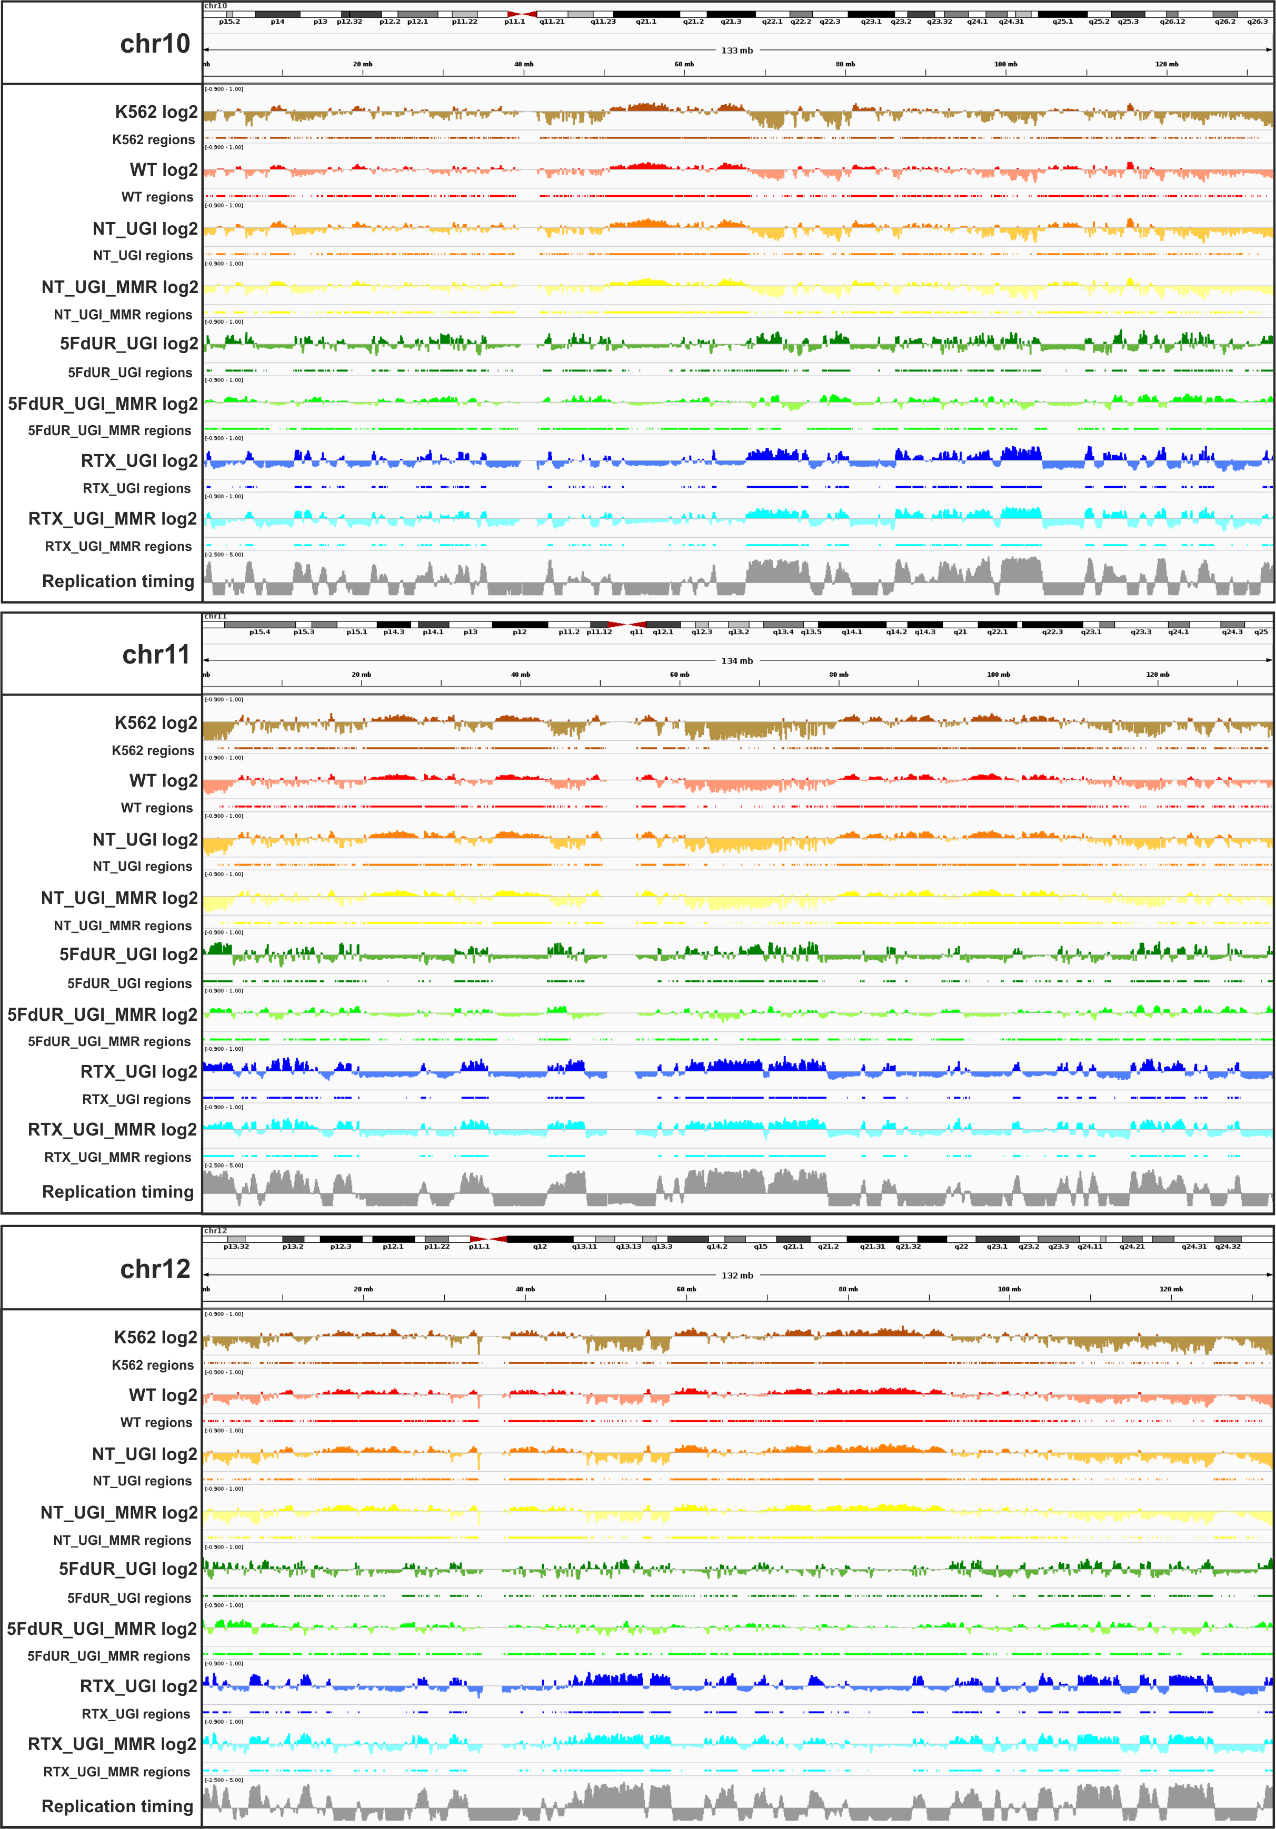

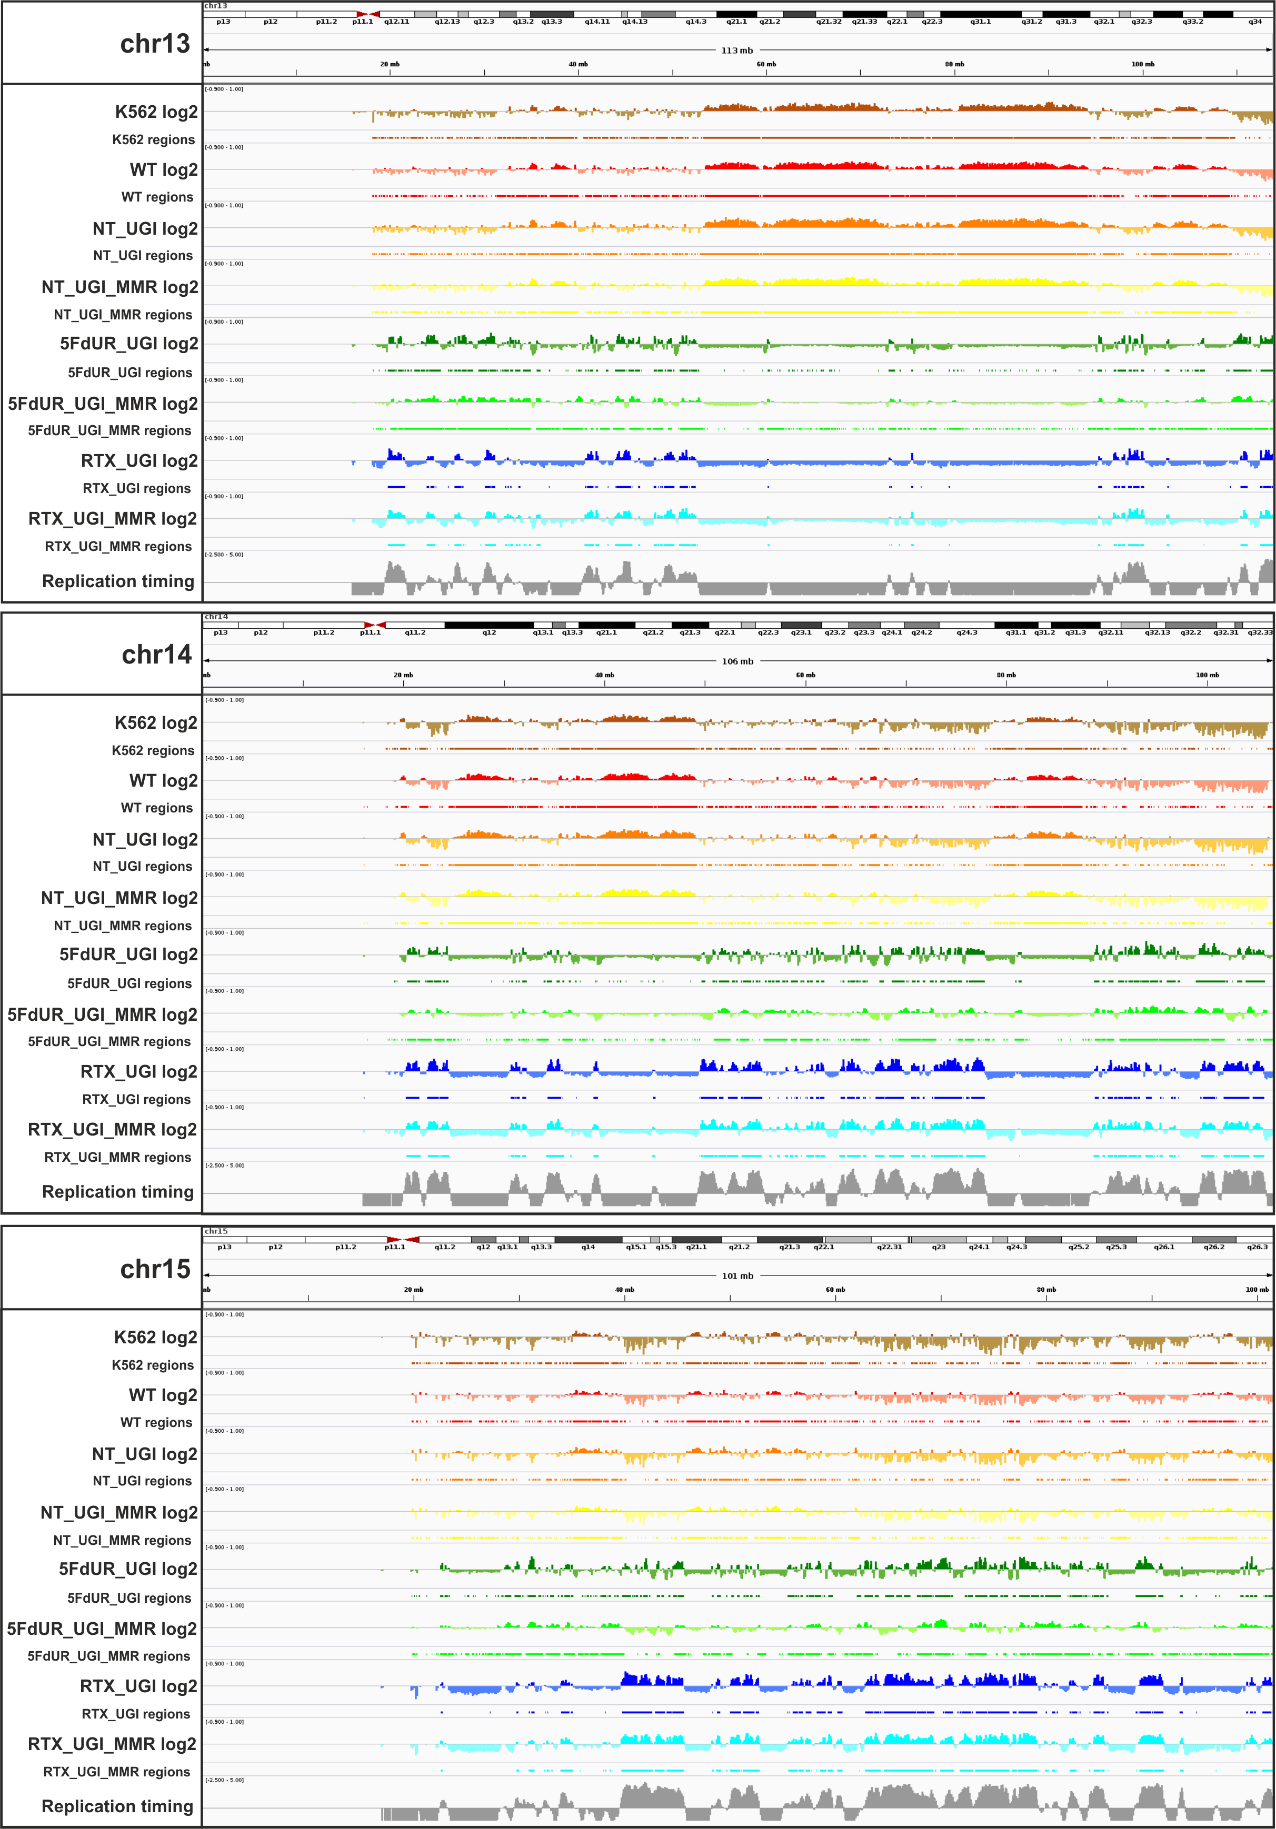

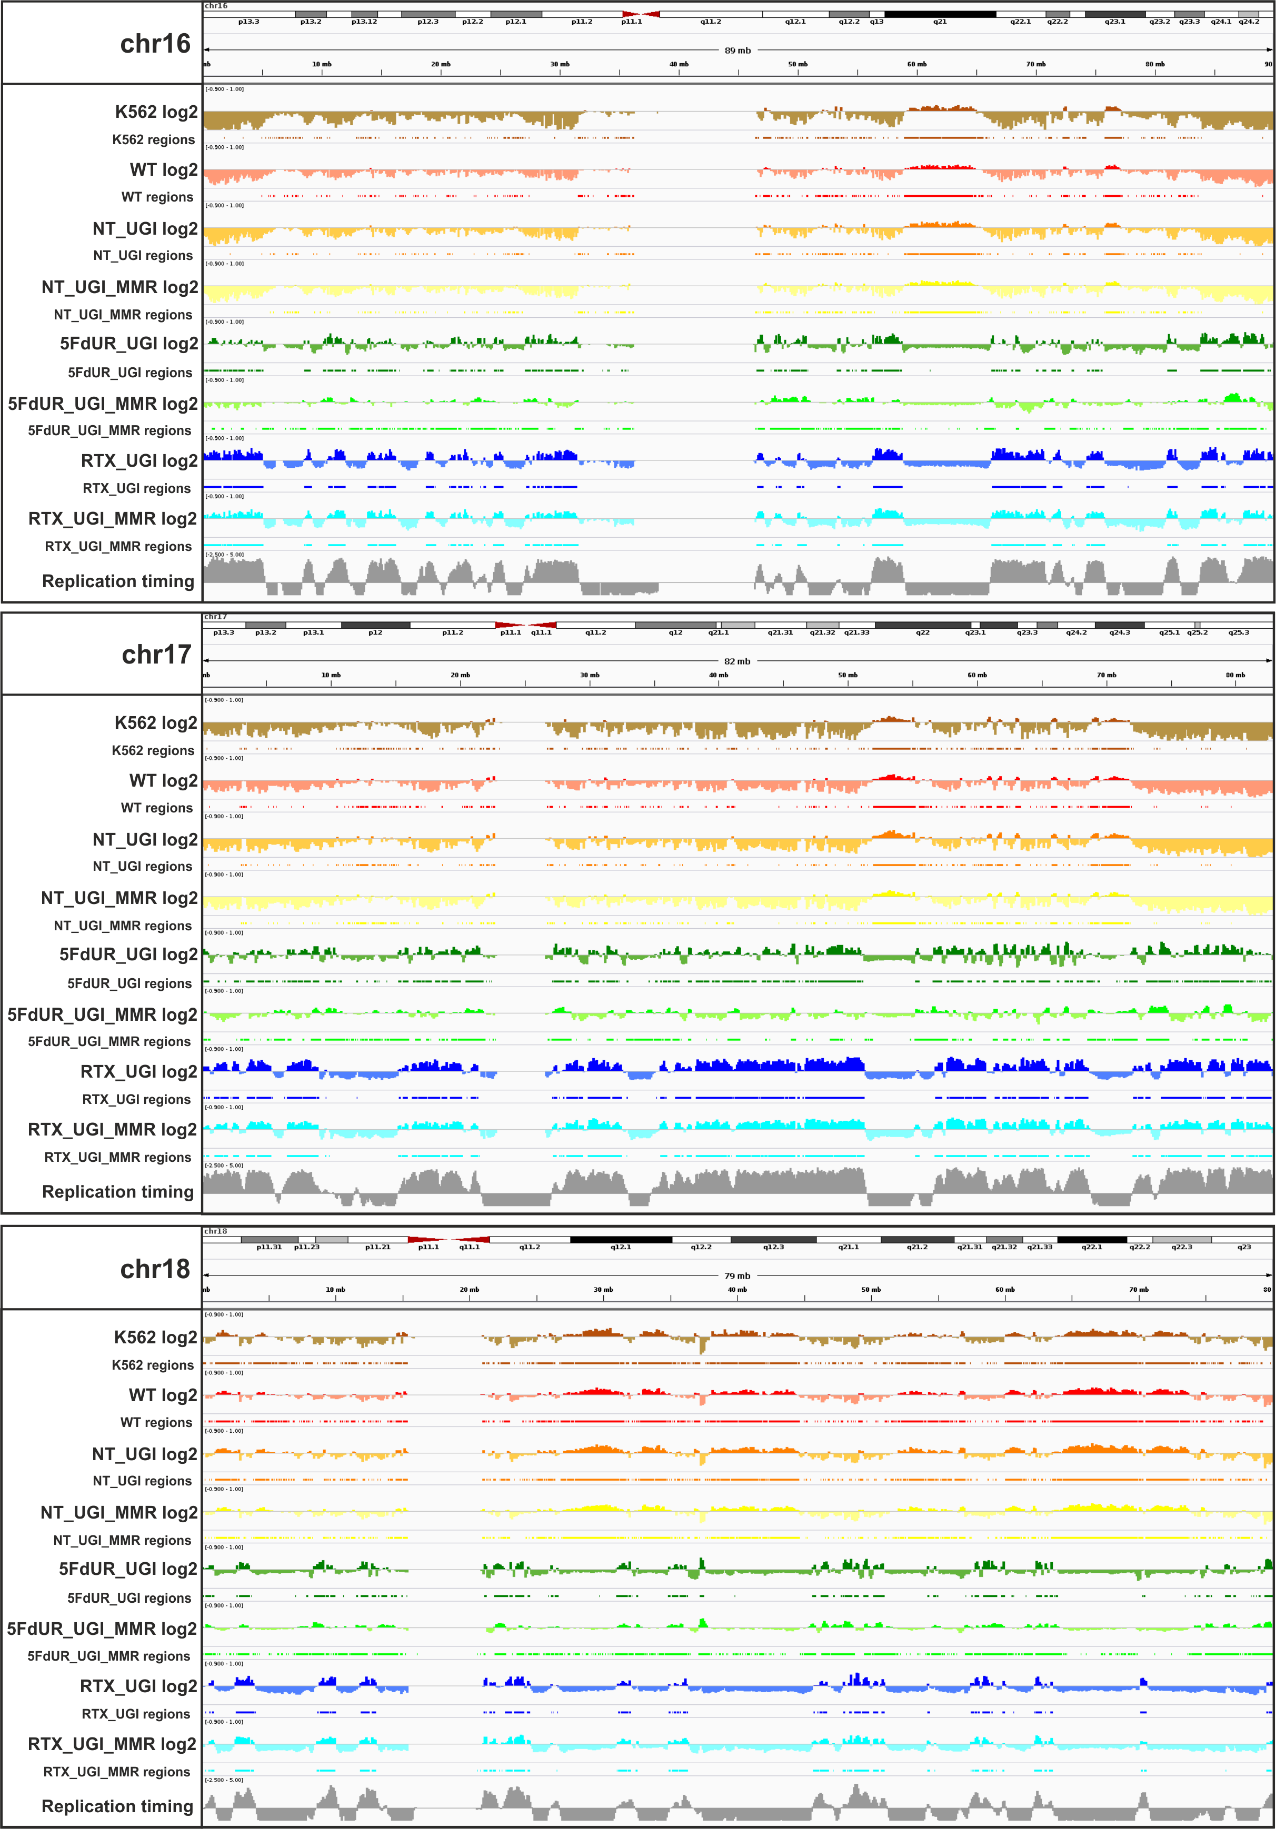

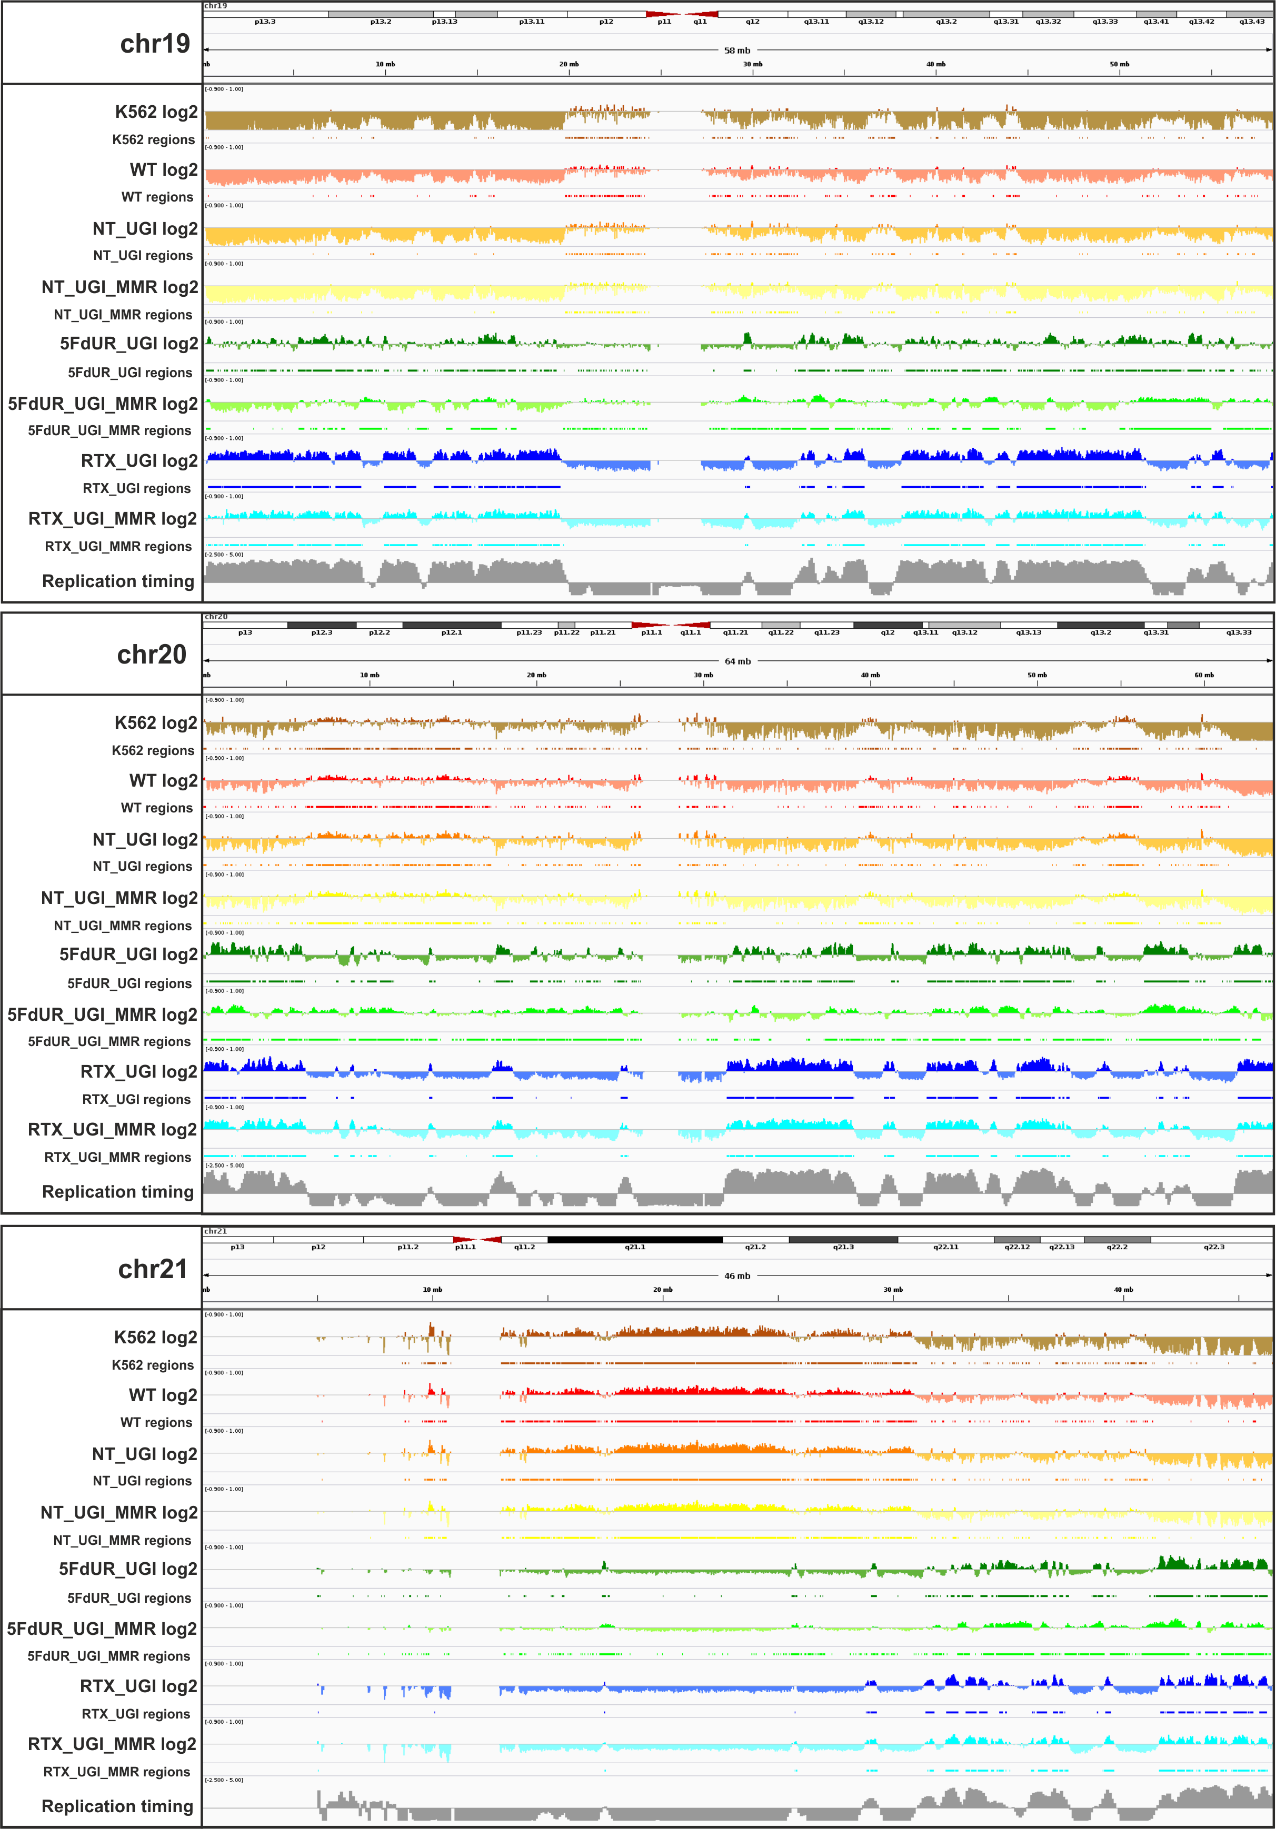

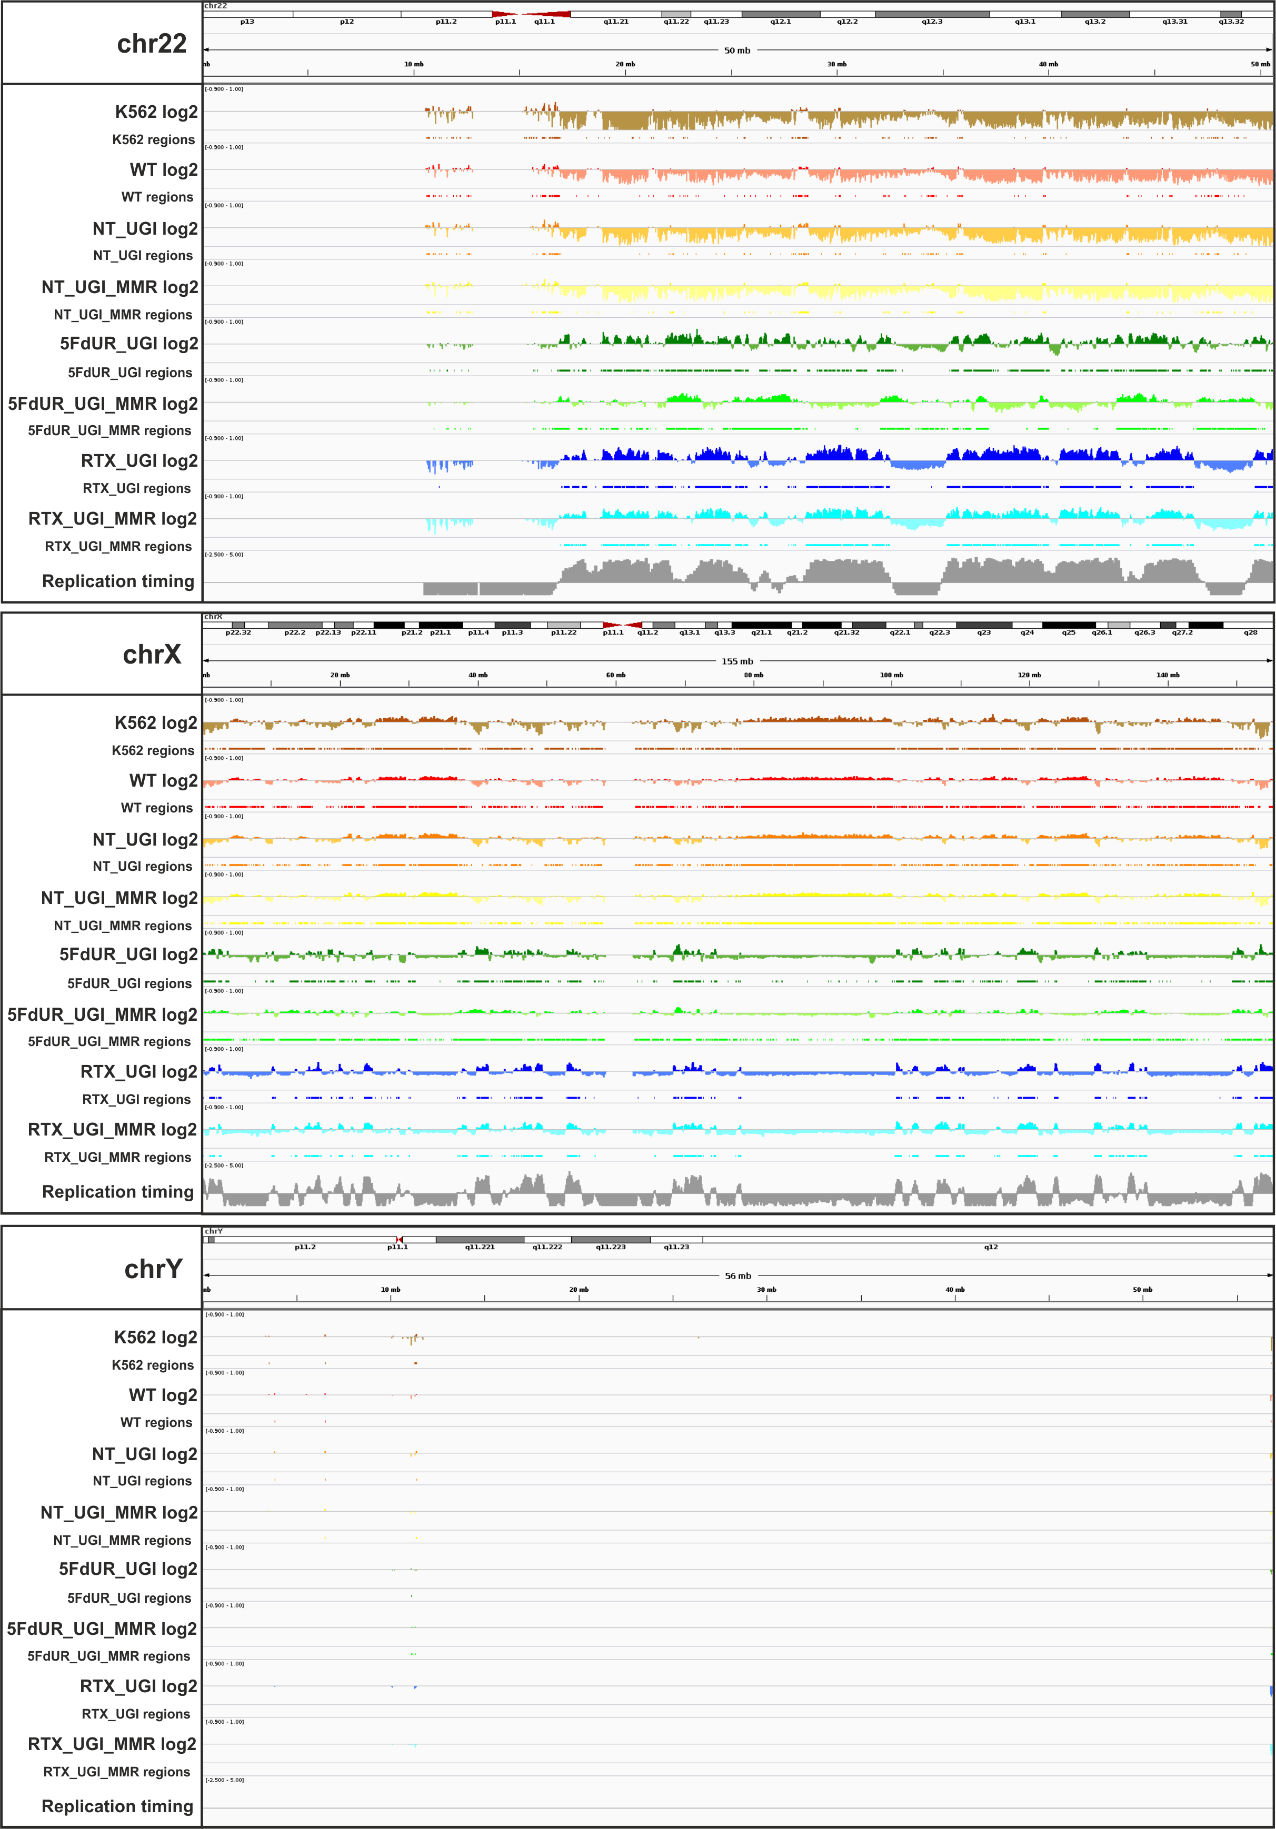

Supplement: supp2 [file elife-60498-supp2-v1.docx]
