# Supplementary material for: Genome-wide alterations of uracil distribution patterns in human DNA upon chemotherapeutic treatments
Source: eLife. 2020 Sep 21;9:e60498. doi: 10.7554/eLife.60498 (PMC7505663; doi:10.7554/eLife.60498)
Supplement: Supplementary file 1. — List of the investigated samples (table 1); list of applied tools (table 2); pre-processing including blacklisting and additional statistics (table 3); and methods to determine uracil enrichment pattern. All applied processing steps are given in generalized command lines. [file elife-60498-supp1.pdf]

## Supplementary file 1

### Detailed analysis pipeline – methods of U-DNA-Seq data analysis

#### Supplementary file 1-table 1. Description of the investigated samples.

| abbreviation     | description                                                            |
|------------------|------------------------------------------------------------------------|
| WT               | wild type HCT116 that is MMR deficient                                 |
| NT_UGI           | non-treated UGI-expressing HCT116                                      |
| NT_UGI_MMR       | non-treated UGI-expressing HCT116, MMR proficient variant              |
| 5FdUR_UGI        | 5FdUR treated UGI-expressing HCT116                                    |
| 5FdUR_UGI_MMR    | 5FdUR treated UGI-expressing HCT116, MMR proficient variant            |
| RTX_UGI          | RTX treated UGI-expressing HCT116                                      |
| RTX_UGI_MMR      | RTX treated UGI-expressing HCT116, MMR proficient variant              |
| NT_UGI_ctr       | empty bead control for U-DNA-IP in non-treated UGI-expressing HCT116   |
| 5FdUR_UGI_ctr    | empty bead control for U-DNA-IP in 5FdUR treated UGI-expressing HCT116 |
| NT_UGI_H3K36me3  | ChIP-seq for H3K36me3 in non-treated UGI-expressing HCT116             |
| RTX_UGI_H3K36me3 | ChIP-seq for H3K36me3 in RTX treated UGI-expressing HCT116             |

#### Supplementary file 1-table 2. Details on the applied tools.

| Program package | tool            | purpose                                                                                                                               | Version | Link                                                                                                                                 |
|-----------------|-----------------|---------------------------------------------------------------------------------------------------------------------------------------|---------|--------------------------------------------------------------------------------------------------------------------------------------|
| FastQC          |                 | Quality checking                                                                                                                      | 0.11.7  | <a href="https://www.bioinformatics.braham.ac.uk/projects/fastqc">https://www.bioinformatics.braham.ac.uk/projects/fastqc</a>        |
| Trimmomatic     |                 | Adapter and quality trimming                                                                                                          | 0.36    | <a href="https://github.com/timflutre/trimmomatic">https://github.com/timflutre/trimmomatic</a> (Bolger, Lohse, & Usadel, 2014)      |
| BWA             | MEM             | <i>Burrows-Wheeler Aligner</i>                                                                                                        | 0.7.17  | <a href="https://github.com/lh3/bwa">https://github.com/lh3/bwa</a> (H. W. Li, 2013)                                                 |
| samtools        | view            | Filtering reads in bam files                                                                                                          | 1.9     | <a href="https://github.com/samtools/samtools">https://github.com/samtools/samtools</a> (H. Li et al., 2009)                         |
|                 | merge           | Concatenating bam files                                                                                                               |         |                                                                                                                                      |
|                 | sort            | Sorting reads in a bam file (required by most of the downstream application)                                                          |         |                                                                                                                                      |
|                 | index           | Indexing bam files (required by most of the downstream application)                                                                   |         |                                                                                                                                      |
|                 | idxstats        | Reporting the numbers of mapped and unmapped reads in an indexed bam file along the chromosomes and scaffolds in the reference genome |         |                                                                                                                                      |
| Picard Tools    | MarkDuplicates  | Filtering out reads corresponding to PCR or optical duplicates                                                                        | 1.95    | <a href="http://broadinstitute.github.io/picard">http://broadinstitute.github.io/picard</a>                                          |
| deepTools       | multiBamSummary | Genome-wide comparison of multiple bam files regarding the read coverage in defined sized bins                                        | 3.2.1   | <a href="https://github.com/deeptools/deepTools/releases">https://github.com/deeptools/deepTools/releases</a> (Ramírez et al., 2016) |
|                 | bamCoverage     | Calculating genome scaled read coverage tracks in databins and with the option of smoothing resulting in bedgraph or bigWig files     |         |                                                                                                                                      |

|                              |                             |                                                                                                                                                                                   |        |                                                                                                                                                         |
|------------------------------|-----------------------------|-----------------------------------------------------------------------------------------------------------------------------------------------------------------------------------|--------|---------------------------------------------------------------------------------------------------------------------------------------------------------|
|                              | bigwigCompare               | Comparing two bigWig files in many different ways e.g. log2 ratio or subtract                                                                                                     |        |                                                                                                                                                         |
|                              | multiBigWigSummary          | Genome-wide comparison of multiple bw files in defined sized bins                                                                                                                 |        |                                                                                                                                                         |
|                              | plotCorrelation             | Calculating and plotting the correlation coefficients from the results of multiBigWigSummary or multiBamSummary                                                                   |        |                                                                                                                                                         |
| bedtools2                    | merge                       | Merging intervals in files in many different ways                                                                                                                                 | 2.28.0 | <a href="https://github.com/arg5x/bedtools2">https://github.com/arg5x/bedtools2</a> (Quinlan & Hall, 2010)                                              |
|                              | subtract                    | Subtracting intervals in files in different ways                                                                                                                                  |        |                                                                                                                                                         |
|                              | complement                  | Taking the complement of an interval file comparing to a reference genome                                                                                                         |        |                                                                                                                                                         |
|                              | intersect                   | Extracting overlapping fractions of interval files in many different ways                                                                                                         |        |                                                                                                                                                         |
|                              | jaccard                     | Calculating Jaccard indices (ratio of base numbers in the intersect over the union of two interval files)                                                                         |        |                                                                                                                                                         |
|                              | annotate                    | Comparing query interval file to a set of database interval files, and reporting overlap ratio and/or the number of overlapping intervals for each interval in the query bed file |        |                                                                                                                                                         |
| GIGGLE                       | sort_bed                    | A script utilizing also bgzip, to sort and compress bed files for giggle search                                                                                                   | 1.0    | <a href="https://github.com/ryanlayer/giggle">https://github.com/ryanlayer/giggle</a> (Layer et al., 2018)                                              |
|                              | Index                       | Special indexing applied for the library of the database interval files                                                                                                           |        |                                                                                                                                                         |
|                              | search                      | Scoring colocalization between a query and indexed database interval files                                                                                                        |        |                                                                                                                                                         |
| kentUtils                    | bigWigToWig                 | conversion tool from the binary coded bigWig to a text format Wiggle file                                                                                                         |        | <a href="https://github.com/ucscGenomeBrowser/kent">https://github.com/ucscGenomeBrowser/kent</a> (Kuhn, Haussler, & Kent, 2013)                        |
|                              | bigWigAverageOverBed        | Averaging scores in a bw files for the intervals given in a bed files                                                                                                             |        |                                                                                                                                                         |
|                              | liftOver                    | Converting genomic coordinates in a bed file from one to another reference genome version                                                                                         |        |                                                                                                                                                         |
| MACS2                        | callpeak                    | Calling peaks of read coverage, standard tool in ChIP-seq data analysis                                                                                                           | 2.1.2  | <a href="https://github.com/taoliu/MACS">https://github.com/taoliu/MACS</a> (Feng, Liu, & Zhang, 2011; Zhang et al., 2008)                              |
| Segway package               | Genomedata load             | Preparation of genomedata file for the Segway train and annotate                                                                                                                  | 1.4.4  | <a href="http://noble.gs.washington.edu/proj/genomedata/">http://noble.gs.washington.edu/proj/genomedata/</a> (Hoffman, Buske, & Noble, 2010)           |
|                              | Segway                      | Learning algorithm to define genomic segments with characteristic patterns, performing genome segmentation.                                                                       | 3.0    | <a href="https://segway.hoffmanlab.org/">https://segway.hoffmanlab.org/</a> (Chan et al., 2017; Hoffman et al., 2012)                                   |
|                              | Segtools                    | Calculating signal distribution and other features on the identified genomic segments, and preparing heatmaps and plots                                                           | 1.2.4  | <a href="http://noble.gs.washington.edu/proj/segtools">http://noble.gs.washington.edu/proj/segtools</a> (Buske, Hoffman, Ponts, Le Roch, & Noble, 2011) |
| Python                       | Seaborn, Matplotlib, Pandas | Seaborn is a library for making statistical graphics in Python. It is built on top of matplotlib and closely integrated with pandas data structures.                              | 0.10.1 | <a href="https://pypi.org/project/seaborn/">https://pypi.org/project/seaborn/</a> (Hunter, 2007; McKinney & others, 2010)                               |
| R                            |                             | Environment for statistical computing                                                                                                                                             | 3.5.1  | <a href="https://www.R-project.org/">https://www.R-project.org/</a> (R Core Team, 2018)                                                                 |
| Linux command-line utilities | awk                         | Text pattern scanning and processing tool to handle big data in text format in many different ways                                                                                | 4.0.2  | Copyright © 2016 Free Software Foundation, Inc.                                                                                                         |
|                              | sort                        | Sorting information of a text file in many different ways                                                                                                                         | 8.22   |                                                                                                                                                         |
|                              | grep                        | Handling and processing big data in text format in many different ways                                                                                                            | 2.20   |                                                                                                                                                         |

## Preprocessing

Raw sequencing data for both input and enriched samples were first quality checked (using FastQC) and trimmed (using Trimmomatic (Bolger et al., 2014)), then aligned to the human reference genome (using BWA (H. W. Li, 2013)). The GRCh38.d1.vd1 reference genome sequence (basically the GCA\_000001405.15\_GRCh38\_no\_alt\_analysis\_set (Jensen, Ferretti, Grossman, & Staudt, 2017)) was selected that contains additional decoy segments (GenBank Accession GCA\_000786075) and virus sequences to help eliminating potential contaminating reads from the core alignment (<https://gdc.cancer.gov/about-data/data-harmonization-and-generation/gdc-reference-files> (Gao et al., 2019)). Aligned reads were sorted (using samtools sort (H. Li et al., 2009)), and duplicates were marked (using Picard Tools) resulting in bam files (raw aligned reads). Reads with MAPQ=0 were removed from raw bam files using samtools view as follows.

```
$ samtools view -b -h -q 1 NAME.sorted.dedup.bam -L list_of_chr_bam.bed -o  
NAME.MAPQfiltered.bam
```

*# list\_of\_chr\_bam.bed is a 3 column tab delimited text file with indication of the name of chromosomes, their starts and their ends within the applied reference genome assembly.*

Hereafter, all applied command lines are provided in a generalized way, where „NAME“ consists of the following indications: treatments\_cellType\_replicationNo\_sampleType. In this study, „treatments“ can be WT, NT\_UGI, RTX\_UGI, or 5FdUR\_UGI; cellTypes can be HCT116, HCT116MMR (MMR proficient variant of HCT116) or K562; replicationNo can be rep1, rep2, or merged; sampleType can be IP (=enriched), son (=input), or combination of these in case of log2 ratio or other files derived from two samples (e.g. IP\_vs\_son). Where distinction is necessary, a note is inserted in brackets after the „NAME“ (e.g. NAME(rep1)...), otherwise the command was applied on all of the samples. The names of the files deposited into the Gene Expression Omnibus (GEO, accession number GSE126822) also follow this scheme.

Cell type specific blacklists were created by combination of the universal DAC blacklist (<https://www.encodeproject.org/files/ENCFF419RSJ>) suggested for general use by ENCODE consortium (Amemiya, Kundaje, & Boyle, 2019) and a cell type specific blacklist defined based on Ultra High Signal (UHS) regions and low-mappability regions detected in the input sequencing data (Figure 2-figure supplement 2). This procedure involves deepTools (Ramírez et al., 2016), some tools from the kentUtils package of the UCSC (Kuhn et al., 2013), R and linux command-line utilities. The steps are as follows:

### Method to define Ultra High Signal (UHS) regions:

- (1) Compute coverage tracks without smoothing for input samples only.

```
$ bamCoverage -b NAME.sorted.dedup.bam -o NAME.bin100bp.no_smooth.RPGC.bw --binSize  
100 --verbose --normalizeUsing RPGC --effectiveGenomeSize 2913022398 -p 16
```

```

41
42         (2) Compute histogram on coverage signals to define a threshold above which UHS regions are
43             considered (Figure 2-figure supplement 2C).
44
45 $ bigWigToWig NAME.bin100bp.no_smooth.RPGC.bw NAME.bin100bp.no_smooth.RPGC.wig
46
47 In R:
48
49 > NAME <- read.delim("NAME.bin100bp.no_smooth.RPGC.wig", header=FALSE)
50 > hist(NAME$V4, breaks = 100)
51 > hist(NAME$V4, breaks = 3000, xlim = c(-0.2, 400), ylim = c(0, 5000))
52
53 A threshold at coverage signal = 50 was decided.
54
55         (3) Compute interval (bed) files describing UHS regions.
56
57 # deleting lines that are only for indication the bedGraph sections and then selecting data bins that are
58 above the threshold 50
59
60 $ grep -vWF "bedGraph" NAME.bin100bp.no_smooth.RPGC.wig | awk ' $4 > 50 ' >
61 NAME.bin100bp.no_smooth.RPGC.UHS.bed
62
63 # merging neighboring data bins to a single interval, then sorting, then printing column 1, 2, and 3, and
64 also the line number in each line of the bed file
65
66 $ bedtools merge -i NAME.bin100bp.no_smooth.RPGC.UHS.bed | sort -k1,1 -k2,2n | awk
67 '{print $1 "\t" $2 "\t" $3 "\t" NR}' > NAME.bin100bp.no_smooth.RPGC.UHS.numbered.bed
68
69 # calculating average log2 uracil enrichment value for the intervals in the bed file, it is added to the
70 column 5
71
72 $ bigWigAverageOverBed -bedOut=NAME.bin100bp.no_smooth.RPGC.UHS.scored.bed
73 NAME.bin100bp.no_smooth.RPGC.bw NAME.bin100bp.no_smooth.RPGC.UHS.numbered.bed DEL.tab
74
75 # sorting, then printing again with the right format of the float numbers in the column 5
76
77 $ sort -k1,1 -k2,2n NAME.bin100bp.no_smooth.RPGC.UHS.scored.bed | awk '{printf "%s\t",
78 $1; printf "%s\t", $2; printf "%s\t", $3; printf "%s\t", $4; printf "%f\n", $5}' >
79 NAME.bin100bp.no_smooth.RPGC.UHS.scored2.bed
80
81
82 Method to define low-mappability regions:
83
84         (1) Compute coverage tracks without smoothing and also without normalizing for the input bam
85             files, original and filtered ones (in filtered one, the MAPQ=0 reads were removed using
86             samtools view, see above).
87
88 $ bamCoverage -b NAME.sorted.dedup.bam -o NAME.bin100bp.no_smooth.no_norm.bw --binSize
89 100 --verbose --effectiveGenomeSize 2913022398 -p 16

```

```

74 $ bamCoverage -b NAME.MAPQfiltered.bam -o
75 NAME.MAPQfiltered.bin100bp.no_smooth.no_norm.bw --binSize 100 --verbose --
76 effectiveGenomeSize 2913022398 -p 16

77         (2) Compute log2 ratio track of coverage original / filtered (using deepTools/BamCompare for bins
78         100bp).

79 $ bigwigCompare -b1 NAME.bin100bp.no_smooth.no_norm.bw -b2
80 NAME.MAPQfiltered.bin100bp.no_smooth.no_norm.bw -o NAME.original_vs_filtered.log2.bw -
81 of bigwig --binSize 100 --skipZeroOverZero --pseudocount 2 1 -v -p 16

82         (3) Compute histogram on log2 ratio signals (Figure 2-figure supplement 2D).

83 $ bigWigToWig NAME.original_vs_filtered.log2.bw NAME.original_vs_filtered.log2.wig

84 In R (R Core Team, 2018):

85 > NAME_of <- read.delim("NAME.original_vs_filtered.log2.wig", header=FALSE)
86 > hist(NAME_of$V4, breaks = 100)
87 > hist(NAME_of$V4, breaks = 100, xlim = c(-0.2, 4), ylim = c(0, 1500000))

88 A threshold at log2 ratio signal = 1.0 was decided, that means that half of the reads in the given bin have
89 MAPQ=0.

90         (4) Compute interval (bed) files that describe regions with more than 50% ambiguously mapped
91         reads considered as low-mappability regions.

92 $ grep -vWF "bedGraph" NAME.original_vs_filtered.log2.wig | awk ' $4 > 1 ' >
93 NAME.original_vs_filtered.log2.blackMAPQ.bed

94 $ bedtools merge -i NAME.original_vs_filtered.log2.blackMAPQ.bed | sort -k1,1 -k2,2n |
95 awk '{print $1 "\t" $2 "\t" $3 "\t" NR}' >
96 NAME.original_vs_filtered.log2.blackMAPQ.numbered.bed

97 $ bigWigAverageOverBed -bedOut=NAME.original_vs_filtered.log2.blackMAPQ.scored.bed
98 NAME.original_vs_filtered.log2.bw
99 NAME.original_vs_filtered.log2.blackMAPQ.numbered.bed DEL.tab

100 $ sort -k1,1 -k2,2n NAME.original_vs_filtered.log2.blackMAPQ.scored.bed | awk '{printf
101 "%s\t", $1; printf "%s\t", $2; printf "%s\t", $3; printf "%s\t", $4; printf "%f\n",
102 $5}' > NAME.original_vs_filtered.log2.blackMAPQ.scored2.bed

103 Cell type specific blacklists were then created by merging the DAC blacklist (ENCFF419RSJ), the UHS and
104 the low-mappability regions using bedtools merge with the parameter - d500 to avoid 500 bases or shorter
105 gaps with obviously no biological meaning (cf. purple and black intervals on IGV view at Figure 2-figure
106 supplement 2B). For HCT116 cell line specific blacklist, all the corresponding input samples were used and
107 the derived intervals were merged together.

108 $ cat NAME1.bin100bp.no_smooth.RPGC.UHS.scored2.bed
109 NAME2.bin100bp.no_smooth.RPGC.UHS.scored2.bed {...}

```

```

110 NAMEn.bin100bp.no_smooth.RPGC.UHS.scored2.bed | sort -k1,1 -k2,2n >
111 united_sorted_UHS_HCT116.bed

112 $ bedtools merge -i united_sorted_UHS_HCT116.bed > UHS_HCT116.bed

113 $ cat NAME1.original_vs_filtered.log2.blackMAPQ.scored2.bed
114 NAME2.original_vs_filtered.log2.blackMAPQ.scored2.bed {...}
115 NAMEn.original_vs_filtered.log2.blackMAPQ.scored2.bed | sort -k1,1 -k2,2n >
116 united_sorted_blackMAPQ_HCT116.bed

117 $ bedtools merge -i united_sorted_blackMAPQ_HCT116.bed > blackMAPQ_HCT116.bed

118 $ cat ENCF419RSJ.bed UHS_HCT116.bed blackMAPQ_HCT116.bed | sort -k1,1 -k2,2n >
119 united_sorted_blacklist_HCT116.bed

120 $ bedtools merge -i united_sorted_blacklist_HCT116.bed -d 500 > blacklist_HCT116.bed
121

```

122 The effective genome size was calculated by subtracting the blacklisted and the originally masked  
123 regions of the reference genome.

```

124 $ bedtools subtract -a list_of_chr_bam.bed -b blacklist_HCT116.bed >
125 not_blacklisted_HCT116.bed

126 $ bedtools nuc -fi GRCh38.d1.vd1.fa -bed not_blacklisted_HCT116.bed >
127 not_blacklisted_HCT116_nuc.bed

128 $ awk '{(sum1+=$6) (sum2+=$9) (sum3+=$7) (sum4+=$8) (sum5+=$10) (sum6+=$11)
129 (sum7+=$12)} END {print sum1 "\t" sum2 "\t" sum3 "\t" sum4 "\t" sum5 "\t" sum6 "\t"
130 sum7}' not_blacklisted_HCT116_nuc.bed

131 825630405      826937345      570444697      570830493      165010872      99      2958853872

```

132 *# Note that awk will sum up the number from the head line too – so column number has to be subtracted.*

| 133 | number of A | number of T | number of C | number of G | number of N | N° other | length     |
|-----|-------------|-------------|-------------|-------------|-------------|----------|------------|
| 134 | 825630399   | 826937336   | 570444690   | 570830485   | 165010862   | 88       | 2958853860 |

135 Thereby, the effective genome size was calculated for the analysis of the HCT116 samples as  
136 2793842910 (length – number of N – N° other). For the MMR proficient HCT116 cells, a separate blacklist  
137 was calculated. Accordingly, the effective genome size has been changed to 2804512581.

138 GC content for the effective part of the reference genome was found to be 40.85% for both MMR deficient  
139 and proficient HCT116 cells. This was calculated according to the formula: (number of C + number of G)  
140 / effective genome size.

141

142 This cell type specific united blacklist was applied in samtools view to BAM files that were also filtered for  
143 MAPQ=0 reads previously.

```

144 $ samtools view -b -h NAME.MAPQfiltered.bam -L blacklist_HCT116.bed -o
145 NAME.blacklist.bam -U NAME.filtered_blacklisted.bam

146 $ samtools index NAME.filtered_blacklisted.bam

147 $ samtools idxstats NAME.filtered_blacklisted.bam >
148 NAME.filtered_blacklisted.bam.idxstats.csv

```

149

150 **Supplementary file 1-table 3. Number of reads in samples during the pre-processing steps.** All  
151 samples and replicates are shown here that were sequenced in the frame of the present publication.  
152 Number of raw reads means read number before starting alignment (the sum of the mapped and unmapped  
153 read numbers). Uniquely mapped read means that MAPQ is not zero. The samples are as follows: non-  
154 treated wild-type (WT), non-treated UGI-expressing (NT\_UGI), 5FdUR treated UGI-expressing  
155 (5FdUR\_UGI), RTX treated UGI-expressing (RTX\_UGI) HCT116 cells; non-treated UGI-expressing  
156 (NT\_UGI MMR), 5FdUR treated UGI-expressing (5FdUR\_UGI MMR), RTX treated UGI-expressing  
157 (RTX\_UGI MMR) MMR proficient version of HCT116 cells, and non-treated wild-type K562 cells (K562).  
158 Genomic DNA was isolated and sonicated to about 300 kb fragments (input), uracil-DNA was enriched by  
159 immunoprecipitation via FLAG-tagged U-DNA sensor (enriched). Here, we included K562 data too that was  
160 addressed to have a kind of reference point to the previously published dU-seq data (Shu et al., 2018) with  
161 which detailed comparison is also made in the Appendix 1.

| sample                       | replicates    | number of<br>raw reads | number of<br>mapped<br>reads | unmapped reads |      | uniquely mapped reads |       | uniquely mapped<br>reads after blacklisting |       |
|------------------------------|---------------|------------------------|------------------------------|----------------|------|-----------------------|-------|---------------------------------------------|-------|
|                              |               |                        |                              | number         | %    | number                | %     | number                                      | %     |
| WT input                     | WT1_son       | 138283424              | 138113944                    | 169480         | 0.12 | 131604925             | 95.17 | 126302380                                   | 91.34 |
|                              | WT2_son       | 185174607              | 184959442                    | 215165         | 0.12 | 175302618             | 94.67 | 168698159                                   | 91.10 |
| WT enriched                  | WT1_IP        | 144612745              | 144094135                    | 518610         | 0.36 | 138611548             | 95.85 | 131765827                                   | 91.12 |
|                              | WT2_IP        | 159514985              | 159314208                    | 200777         | 0.13 | 152796029             | 95.79 | 145489972                                   | 91.21 |
| NT_UGI<br>input              | NT1_son       | 164023406              | 163757733                    | 265673         | 0.16 | 156045404             | 95.14 | 149734348                                   | 91.29 |
|                              | NT2_son       | 173254485              | 173088530                    | 165955         | 0.10 | 165373102             | 95.45 | 158978819                                   | 91.76 |
| NT_UGI<br>enriched           | NT1_IP        | 260763674              | 260300247                    | 463427         | 0.18 | 251164014             | 96.32 | 239327438                                   | 91.78 |
|                              | NT2_IP        | 136148357              | 134759365                    | 1388992        | 1.02 | 129486254             | 95.11 | 123064064                                   | 90.39 |
| 5FdUR_UGI<br>input           | 5FdUR1_son    | 128706895              | 128669770                    | 37125          | 0.03 | 122476766             | 95.16 | 118558597                                   | 92.12 |
|                              | 5FdUR1_son    | 201926203              | 201560665                    | 365538         | 0.18 | 193086643             | 95.62 | 184756297                                   | 91.50 |
| 5FdUR_UGI<br>enriched        | 5FdUR1_IP     | 150596242              | 150522522                    | 73720          | 0.05 | 144554269             | 95.99 | 141582874                                   | 94.01 |
|                              | 5FdUR2_IP     | 138651760              | 138410833                    | 240927         | 0.17 | 133200761             | 96.07 | 128584894                                   | 92.74 |
| RTX_UGI<br>input             | RTX1_son      | 145920877              | 145775676                    | 145201         | 0.10 | 139168642             | 95.37 | 133567232                                   | 91.53 |
|                              | RTX2_son      | 147882518              | 147674678                    | 207840         | 0.14 | 141097936             | 95.41 | 135259752                                   | 91.46 |
| RTX_UGI<br>enriched          | RTX1_IP       | 166544868              | 166305588                    | 239280         | 0.14 | 160567280             | 96.41 | 155171205                                   | 93.17 |
|                              | RTX2_IP       | 151875638              | 151666578                    | 209060         | 0.14 | 146619425             | 96.54 | 141987664                                   | 93.49 |
| NT_UGI MMR<br>input          | NT1MMR_son    | 176769886              | 176519499                    | 250387         | 0.14 | 168384253             | 95.26 | 162316924                                   | 91.82 |
|                              | NT2MMR_son    | 158422442              | 158204670                    | 217772         | 0.14 | 150145829             | 94.78 | 144327780                                   | 91.10 |
| NT_UGI MMR<br>enriched       | NT1MMR_IP     | 206717745              | 206322712                    | 395033         | 0.19 | 198774470             | 96.16 | 189830957                                   | 91.83 |
|                              | NT2MMR_IP     | 181222656              | 180978162                    | 244494         | 0.13 | 174061142             | 96.05 | 167043578                                   | 92.18 |
| 5FdUR_UGI<br>MMR input       | 5FdUR0MMR_son | 225701020              | 225256603                    | 444417         | 0.20 | 215868115             | 95.64 | 206203797                                   | 91.36 |
|                              | 5FdUR1MMR_son | 161595292              | 161314811                    | 280481         | 0.17 | 153899974             | 95.24 | 147556558                                   | 91.31 |
|                              | 5FdUR2MMR_son | 168394046              | 168247239                    | 146807         | 0.09 | 160551391             | 95.34 | 153742056                                   | 91.30 |
| 5FdUR_UGI<br>MMR<br>enriched | 5FdUR0MMR_IP  | 163350647              | 163119913                    | 230734         | 0.14 | 156865033             | 96.03 | 152306214                                   | 93.24 |
|                              | 5FdUR1MMR_IP  | 165059439              | 164692746                    | 366693         | 0.22 | 157148267             | 95.21 | 152505075                                   | 92.39 |
|                              | 5FdUR2MMR_IP  | 161660950              | 161500117                    | 160833         | 0.10 | 154724245             | 95.71 | 150031196                                   | 92.81 |
| RTX_UGI<br>MMR input         | RTX1MMR_son   | 182107737              | 181930877                    | 176860         | 0.10 | 173346807             | 95.19 | 165477472                                   | 90.87 |
|                              | RTX2MMR_son   | 216039165              | 215831688                    | 207477         | 0.10 | 204582815             | 94.70 | 195579694                                   | 90.53 |
| RTX_UGI<br>MMR<br>enriched   | RTX1MMR_IP    | 142816751              | 142519961                    | 296790         | 0.21 | 136944112             | 95.89 | 133722720                                   | 93.63 |
|                              | RTX2MMR_IP    | 166796548              | 166485737                    | 310811         | 0.19 | 159559070             | 95.66 | 155107383                                   | 92.99 |
| K562 input                   | K562_son      | 106137622              | 105875437                    | 262185         | 0.25 | 100326105             | 94.52 | 97429855                                    | 91.8  |
| K562<br>enriched             | K562_IP       | 109490393              | 109306854                    | 183539         | 0.17 | 105310296             | 96.18 | 102013265                                   | 93.17 |

Correlation was calculated among bam files using multiBamSummary and plotCorrelation tools of the deepTools package (Ramírez et al., 2016). Pearson correlation coefficients were calculated with 5000 bases bin size between uniquely mapped reads of samples after blacklisting as follows:

```
$ multiBamSummary bins --binSize 5000 -b NAME1.filtered_blacklisted.bam
NAME2.filtered_blacklisted.bam {...} NAMEn.filtered_blacklisted.bam -o
multiBamSummary_bin5000.npz --scalingFactors
scalingFactors_from_multiBamSummary_bin5000.txt --outRawCounts
raw_counts_from_multiBamSummary_bin5000.csv --ignoreDuplicates --maxFragmentLength
2000 --extendReads -v -p 16

$ plotCorrelation --corData multiBamSummary_bin5000.npz --corMethod pearson --
whatToPlot heatmap -o multiBamSummary_bin5000_heatmap.png -T multiBamSummary_bin5000 -
-skipZeros --removeOutliers --plotNumbers --colorMap RdPu
```

Pearson correlation coefficients between replicates were measured as follows: WT enriched: 0.92, input: 0.89; NT\_UGI enriched: 0.79, input: 0.82; 5FdUR\_UGI enriched: 0.87, input: 0.88; RTX\_UGI enriched: 0.97, input: 0.89. NT\_UGI\_MMR enriched: 0.92, input: 0.84; 5FdUR\_UGI\_MMR enriched: 0.88, input: 0.78; RTX\_UGI\_MMR enriched: 0.95, input: 0.93. All further data processing and analysis steps were done on the two biological replicates separately, as well as on merged bam files of corresponding replicates. All the results were in good agreement between replicates, so hereafter, in the main figures, we show results for the merged data.

Merging replicates were performed at the level of cleaned aligned reads (filtered\_blacklisted.bam files) using samtools merge (H. Li et al., 2009).

```
$ samtools merge -r -l -c --threads 16
NAME(merged).filtered_blacklisted.non_sorted.bam NAME(rep1).filtered_blacklisted.bam
NAME(rep2).filtered_blacklisted.bam

$ samtools sort -ll -o NAME(merged).filtered_blacklisted.bam -O BAM -@16
NAME(merged).filtered_blacklisted.non_sorted.bam

$ samtools index NAME(merged).filtered_blacklisted.bam
```

Comparison of the samples at the level of merged, filtered and blacklisted bam files (Figure 2-figure supplement 3) shows clear differences among input and enriched files, as well as treated and non-treated samples. All input files belong to the HCT116 cell line are quite similar, while the input sample of K562 cells shows significant difference that is another argument for cell type specific blacklisting.

#### **Determination of uracil enrichment: log2 ratio track and derived regions versus peaks called by MACS2 tool.**

Uracil enrichment should be determined from the increased coverage of enriched data versus the input using cleaned aligned reads (filtered\_blacklisted.bam files), as it is also recommended by the current

ENCODE standard (<https://www.encodeproject.org/chip-seq/histone/#restrictions>). For that, basically two main ways are available: 1) conventional peak calling algorithms (e.g. MACS2 (Feng et al., 2011; Zhang et al., 2008)), especially if relatively intense and sharp peaks of enrichment are expected; 2) calculation and comparison of genome scaled coverage tracks for both enriched and input sequencing data e.g. in the form of log2 ratio tracks (Figure 3-figure supplement 1). This latter option results in more detailed information on the enrichment in the format of bedGraph or bigwig (bw). However, such log2 ratio tracks (bw files) can hardly be used to screen large databases for colocalizing genomic features or factor binding profiles (cf. Figure 2-figure supplement 1).

In case of the present samples (either non-treated or treated by thymidylate biosynthesis inhibitors), we found broad genomic regions with elevated log2 signals rather than intense sharp peaks (Figure 3A, Figure 3-figure supplement 1, Figure 4-figure supplement 2). Hence, we decided to derive interval (bed) files from the log2 ratio tracks (bw) using a threshold reasonable based on log2 ratio signal histograms (cf. Figure 3C, and Figure 3-figure supplement 4). These intervals might be able to describe such broad regions of uracil enrichment better than the peak calling results (cf. Figure 3-figure supplement 1), and simultaneously allow efficient screening of large datasets for colocalizing features.

To further access the appropriate approach of data processing and extracting information on genomic uracil enrichment, we performed both 1) broad peak calling, and 2) extraction of even broader regions based on log2 ratio tracks. Hereafter, the two terms 'peak' and 'region' will be consequently applied for the results of these two approaches, respectively.

- 1) Peak calling was performed using broad peak option in MACS2 at two different broad-cutoff values (grey intervals at Figure 3-figure supplement 1). Note that --cutoff-analysis option can also be used to estimate the number and length of the peaks at different q and p cutoff values.

```
$ MACS2 callpeak -t NAME(IP).filtered_blacklisted.bam -c
NAME(son).filtered_blacklis.bam --broad -g 2793842910 --broad-cutoff 0.05 -n NAME.0p05
--outdir {PATH} --nomodel -f BAMPE
```

```
$ MACS2 callpeak -t NAME(IP).filtered_blacklisted.bam -c
NAME(son).filtered_blacklis.bam --broad -g 2793842910 --broad-cutoff 0.5 -n NAME.0p5 -
--outdir {PATH} --nomodel -f BAMPE
```

- 2) Determination of broad regions based on log2 ratio tracks was performed as follows using bamCoverage and bigwigCompare tools of deepTools package (Ramírez et al., 2016), some tools from the kentUtils package of the UCSC (Kuhn et al., 2013), R and linux command-line utilities.

```
$ bamCoverage -b NAME.filtered_blacklisted.bam -o NAME.bin100bp.smooth5000.RPGC.bw --
binSize 100 --verbose --smoothLength 5000 --normalizeUsing RPGC --effectiveGenomeSize
2793842910 -p 16 --extendReads
```

```

234 $ bigwigCompare -b1 NAME(IP).bin100bp.smooth5000.RPGC.bw -b2
235 NAME(son).bin100bp.smooth5000.RPGC.bw -o NAME.bin100bp.smooth5000.RPGC.log2.bw -of
236 bigwig --binSize 100 -v -p 16

237 $ bigWigToWig NAME.bin100bp.smooth5000.RPGC.log2.bw
238 NAME.bin100bp.smooth5000.RPGC.log2.wig

239 In R (Figure 3C, and Figure 3-figure supplement 4):

240 > NAME(short) <- read.delim("NAME.bin100bp.smooth5000.RPGC.log2.wig", header=FALSE)
241 > hist(NAME(short)$V4, breaks = 100, xlim = c(-1.5, 1.5), ylim = c(0, 2500000))
242

243 The histograms are shown in Figure 3C, and Figure 3-figure supplement 4, and data are provided in the
244 corresponding source data files. The applied thresholds are shown in Figure 3-figure supplement 2A and
245 also indicated in the corresponding source data files.

246 Extraction of the data bins with log2 ratio signal higher than the threshold was done as follows:

247 # deleting lines that is only for indication the bedGraph sections and then selecting data bins that are above
248 the threshold (in this example, it is 0.2)

249 $ grep -vWF "bedGraph" NAME.bin100bp.smooth5000.RPGC.log2.wig | awk ' $4 > 0.2 ' >
250 NAME.bin100bp.smooth5000.RPGC.log2.0p2.bed

251 # merging neighboring data bins to a single interval, then sorting, then printing column 1, 2, and 3, and also
252 the line number in each line of the bed file

253 $ bedtools merge -i NAME.bin100bp.smooth5000.RPGC.log2.0p2.bed | sort -k1,1 -k2,2n |
254 awk '{print $1 "\t" $2 "\t" $3 "\t" NR}' >
255 NAME.bin100bp.smooth5000.RPGC.log2.0p2.numbered.bed

256 # calculating average log2 uracil enrichment value for the intervals in the bed file, it is added to the column
257 5

258 $ bigWigAverageOverBed -bedOut=NAME.bin100bp.smooth5000.RPGC.log2.0p2.scored.bed
259 NAME.bin100bp.smooth5000.RPGC.log2.bw
260 NAME.bin100bp.smooth5000.RPGC.log2.0p2.numbered.bed DEL.tab

261 # sorting, then printing again with the right format of the float numbers in the column 5

262 $ sort -k1,1 -k2,2n NAME.bin100bp.smooth5000.RPGC.log2.0p2.scored.bed | awk '{printf
263 "%s\t", $1; printf "%s\t", $2; printf "%s\t", $3; printf "%s\t", $4; printf "%f\n",
264 $5}' > NAME.bin100bp.smooth5000.RPGC.log2.0p2.region.bed

265 # only if top ranked intervals have to be selected: sorting by average log2 uracil enrichment scores in
266 decreasing order, then selecting the top 50000 intervals (other numbers of top intervals can be defined as
267 it is desired), then sorting back in alphabetic order (that is required by several possible further applications
268 e.g. bedtools)

269 $ sort -k 5 -nr NAME.bin100bp.smooth5000.RPGC.log2.0p2.region.bed | head -n 50000 |
270 sort -k1,1 -k2,2n > NAME.bin100bp.smooth5000.RPGC.log2.0p2.top50k.bed

```

We argue that peak calling using MACS2 is suboptimal for description of distribution of genomic uracil, even if broad peak calling is applied (Figure 3-figure supplement 1). Based on theoretical expectations (cf. main text) as well as on the initial processing of the actual U-DNA-Seq data, we recommend to use the log2 ratio of the genome scaled coverage tracks and the derived regions of uracil enrichment rather than the peak calling approach.

To further strengthen this choice, we made a detailed comparison on the defined regions of uracil enrichment (based on log2 ratio tracks) and the peak calling results (Figure 3-figure supplement 2). A statistics, including the applied thresholds, Jaccard indices between replicates, and the extent of the regions, are shown for region.bed files derived from the log2 ratio tracks (Figure 3-figure supplement 2A). Regarding peak calling, we found, that using the same broad-cutoff parameter, the numbers of called peaks are extremely different (from 35 000 to 250 000) among the samples, even between parallels. This difference in peak numbers does not seem to correlate with the elevated uracil level in treated samples (cf. higher number of peaks in WT and NT\_UGI samples than in the treated ones). Using the „--cutoff-analysis” option in MACS2, we tried to harmonize the number of called peaks in different samples using sometimes very different broad-cutoff parameters (Figure 3-figure supplement 2B). Comparing the two statistics for the two approaches, the reproducibility of peak calling was still much worse (cf. Jaccard index values between replicates, in case of peak calling (Figure 3-figure supplement 2B) versus log2 regions of uracil enrichment (Figure 3-figure supplement 2A)). Lower reproducibility of peak calling results in lower descriptive value for the uracil distribution, as it is also reflected in comparison of drug-treated and non-treated samples (Figure 3-figure supplement 2D vs C).

Overlapping bases and Jaccard indices were calculated for the interval files by bedtools jaccard tool as follows:

```
$ bedtools jaccard -a NAME1.bin100bp.smooth5000.RPGC.log2.0p2.region.bed -b  
NAME2.bin100bp.smooth5000.RPGC.log2.0p2.region.bed
```

In the QC report of sequencing from Novogene, the GC contents of the sequenced samples were documented. All samples, except for the non-treated enriched ones, were around 42% characteristic for the human genome. However, in case of non-treated enriched samples, the GC content was consequently decreased to around 37%. We were curious, if such difference might occur due to different GC content of the regions enriched in uracils in the non-treated versus drug-treated samples. Indeed, GC contents of regions were decreased to around 33% and increased to about 44-46% in case of non-treated and drug-treated samples, respectively (Figure 3-figure supplement 2A). For comparison, GC content of the not blacklisted and non-masked part of the reference genome was 40.85% ((number of C + number of G) / effective genome size).

305 GC% was calculated for the interval files of each sample using bedtools nuc tool and awk as follows:

```
306 $ bedtools nuc -fi GRCh38.d1.vd1.fa -bed  
307 NAME1.bin100bp.smooth5000.RPGC.log2.0p2.region.bed | awk '{(sum1+= $8) (sum2+= $11)  
308 (sum3+= $9) (sum4+= $10)} END {print sum1 "\t" sum2 "\t" sum3 "\t" sum4}' >>  
309 summary.region.bed.nuc.csv  
  
310 $ bedtools nuc -fi GRCh38.d1.vd1.fa -bed NAME1.0p05_peaks.broadPeak | awk  
311 '{(sum1+= $12) (sum2+= $15) (sum3+= $13) (sum4+= $14)} END {print sum1 "\t" sum2 "\t" sum3  
312 "\t" sum4}' >> summary.peaks.bed.nuc.csv
```

313 Based on the comparison reported in Figure 3-figure supplement 2, we decided that log2 ratio tracks and  
314 the derived interval files will be used for further analysis. For visualization, IGV views are shown for all the  
315 samples (replicates were merged) in a selected genomic region (Figure 3A), as well as for all the  
316 chromosomes (Supplementary file 2).

317 Furthermore, we used multiBigwigSummary and plotCorrelation to show Pearson correlation on log2 ratio  
318 tracks (see the command lines below). Heatmaps for individual replicates (Figure 3-figure supplement 3)  
319 and also for merged replicates (Figure 3B) revealed that the treated and non-treated enriched samples are  
320 well separated in terms of global uracil distribution pattern.

```
321 $ multiBigwigSummary bins -b NAME1.filtered_blacklisted.bw  
322 NAME2.filtered_blacklisted.bw {...} NAMEn.filtered_blacklisted.bw -o  
323 mbws_filtered_blacklisted_bw_data.npz -v -p 16  
  
324 $ plotCorrelation --corData mbws_filtered_blacklisted_bw_data.npz --corMethod pearson  
325 --whatToPlot heatmap -o mbws_filtered_blacklisted_bw_heatmap.png -T  
326 mbws_filtered_blacklisted_bw --skipZeros --removeOutliers --plotNumbers --colorMap  
327 RdPu
```

328

329 For the negative control IP samples, genome-scaled coverage tracks were also calculated in the same way  
330 as described above. Then the control signal tracks were normalized according to the amounts of the pulled  
331 down DNA (measured by Qubit assay, Figure 1-figure supplement 2A), and were subtracted from their  
332 corresponding U-DNA-IP tracks as follows.

```
333 $ bigwigCompare -b1 5FdUR_UGI_IP.bin100bp.smooth5000.RPGC.bw -b2  
334 5FdUR_UGI_ctr.bin100bp.smooth5000.RPGC.bw --operation subtract -o  
335 5FdUR_UGI_IP_subtract_ctr. bin100bp.smooth5000.RPGC.bw -of bigwig --binSize 100 --  
336 scaleFactors 1:0.109 -v -p 32
```

337 These corrected coverage tracks were then combined with their input to calculate log2 enrichment tracks  
338 (cf. Figure 1-figure supplement 2).

```
339 $ bigwigCompare -b1 5FdUR_UGI_IP_subtract_ctr.bin100bp.smooth5000.RPGC.bw -b2  
340 5FdUR_UGI_son.bin100bp.smooth5000.RPGC.bw -o  
341 5FdUR_UGI_ctr_subtracted.bin100bp.smooth5000.RPGC.log2.bw -of bigwig --binSize 100 -v  
342 -p 32
```

## References

- Amemiya, H. M., Kundaje, A., & Boyle, A. P. (2019). The ENCODE Blacklist: Identification of Problematic Regions of the Genome. *Scientific Reports*, 9(1), 9354. <https://doi.org/10.1038/s41598-019-45839-z>
- Bolger, A. M., Lohse, M., & Usadel, B. (2014). Trimmomatic: a flexible trimmer for Illumina sequence data. *Bioinformatics (Oxford, England)*, 30(15), 2114–2120. <https://doi.org/10.1093/bioinformatics/btu170>
- Buske, O. J., Hoffman, M. M., Ponts, N., Le Roch, K. G., & Noble, W. S. (2011). Exploratory analysis of genomic segmentations with Segtools. *BMC Bioinformatics*, 12(1), 415. <https://doi.org/10.1186/1471-2105-12-415>
- Chan, R. C. W., Libbrecht, M. W., Roberts, E. G., Bilmes, J. A., Noble, W. S., & Hoffman, M. M. (2017). Segway 2.0: Gaussian mixture models and minibatch training. *Bioinformatics*, 34(4), 669–671. <https://doi.org/10.1093/bioinformatics/btx603>
- Feng, J., Liu, T., & Zhang, Y. (2011). Using MACS to Identify Peaks from ChIP-Seq Data. *Current Protocols in Bioinformatics*, 34(1), 2.14.1-2.14.14. <https://doi.org/10.1002/0471250953.bi0214s34>
- Gao, G. F., Parker, J. S., Reynolds, S. M., Silva, T. C., Wang, L.-B., Zhou, W., ... Noble, M. S. (2019). Before and After: Comparison of Legacy and Harmonized TCGA Genomic Data Commons' Data. *Cell Systems*, 9(1), 24-34.e10. <https://doi.org/10.1016/j.cels.2019.06.006>
- Hoffman, M. M., Buske, O. J., & Noble, W. S. (2010). The Genomedata format for storing large-scale functional genomics data. *Bioinformatics (Oxford, England)*, 26(11), 1458–1459. <https://doi.org/10.1093/bioinformatics/btq164>
- Hoffman, M. M., Buske, O. J., Wang, J., Weng, Z., Bilmes, J. A., & Noble, W. S. (2012). Unsupervised pattern discovery in human chromatin structure through genomic segmentation. *Nature Methods*, 9(5), 473–476. <https://doi.org/10.1038/nmeth.1937>
- Hunter, J. D. (2007). Matplotlib: A 2D graphics environment. *Computing in Science & Engineering*, 9(3), 90–95.
- Jensen, M. A., Ferretti, V., Grossman, R. L., & Staudt, L. M. (2017). The NCI Genomic Data Commons as an engine for precision medicine. *Blood*, 130(4), 453–459. <https://doi.org/10.1182/blood-2017-03-735654>
- Kuhn, R. M., Haussler, D., & Kent, W. J. (2013). The UCSC genome browser and associated tools. *Briefings in Bioinformatics*, 14(2), 144–161. <https://doi.org/10.1093/bib/bbs038>
- Layer, R. M., Pedersen, B. S., DiSera, T., Marth, G. T., Gertz, J., & Quinlan, A. R. (2018). GIGGLE: a search engine for large-scale integrated genome analysis. *Nature Methods*, 15(2), 123–126. <https://doi.org/10.1038/nmeth.4556>
- Li, H., Handsaker, B., Wysoker, A., Fennell, T., Ruan, J., Homer, N., ... Durbin, R. (2009). The Sequence Alignment/Map format and SAMtools. *Bioinformatics*, 25(16), 2078–2079. <https://doi.org/10.1093/bioinformatics/btp352>
- Li, H. W. (2013). Aligning sequence reads, clone sequences and assembly contigs with BWA-MEM. *ArXiv:1303.3997v1 [q-Bio.GN]*. Retrieved from <https://www.semanticscholar.org/paper/Aligning-sequence-reads%2C-clone-sequences-and-with-Li/0ee3a1f7a363b16ceda8f1053a8172f051fd8d4c>
- McKinney, W., & others. (2010). Data structures for statistical computing in python. In *Proceedings of the 9th Python in Science Conference* (Vol. 445, pp. 51–56).
- Quinlan, A. R., & Hall, I. M. (2010). BEDTools: a flexible suite of utilities for comparing genomic features.

384 *Bioinformatics*, 26(6), 841–842. <https://doi.org/10.1093/bioinformatics/btq033>

385 R Core Team. (2018). R: A language and environment for statistical computing. *R Foundation for*  
386 *Computing, Vienna, Austria. URL <https://www.R-project.org/>.*

387 Ramírez, F., Ryan, D. P., Grüning, B., Bhardwaj, V., Kilpert, F., Richter, A. S., ... Manke, T. (2016).  
388 deepTools2: a next generation web server for deep-sequencing data analysis. *Nucleic Acids*  
389 *Research*, 44(W1), W160-5. <https://doi.org/10.1093/nar/gkw257>

390 Shu, X., Liu, M., Lu, Z., Zhu, C., Meng, H., Huang, S., ... Yi, C. (2018). Genome-wide mapping reveals  
391 that deoxyuridine is enriched in the human centromeric DNA. *Nature Chemical Biology*, 14(7), 680–  
392 687. <https://doi.org/10.1038/s41589-018-0065-9>

393 Zhang, Y., Liu, T., Meyer, C. A., Eeckhoutte, J., Johnson, D. S., Bernstein, B. E., ... Liu, X. S. (2008).  
394 Model-based Analysis of ChIP-Seq (MACS). *Genome Biology*, 9(9), R137.  
395 <https://doi.org/10.1186/gb-2008-9-9-r137>

396
